# Supplementary material for: Dual RNA-seq of Parasite and Host Reveals Gene Expression Dynamics during Filarial Worm–Mosquito Interactions
Source: PLoS Negl Trop Dis. 2014 May 22;8(5):e2905. doi: 10.1371/journal.pntd.0002905 (PMC4031193; doi:10.1371/journal.pntd.0002905)
Supplement: Dataset S1 — A tabular representation of Aedes aegypti and Brugia malayi time course transcript abundance profiles and over-represented gene ontology (GO) terms; comparative analysis of B. malayi time course transcript abundance profiles during infection of compatible (LVP) versus non-compatible (RED) mosquitoes; life cycle transcript abundance profile and mosquito stage enriched expression patterns in B. malayi; Over-represented GO terms among the mosquito stage-enriched genes of B. malayi; Over-represented KEGG pathways among the mosquito stage-enriched genes of B. malayi; and putative secreted proteins among the mosquito stage-enriched genes of B. malayi. All time points and parasite stages are represented. (XLSX) [file pntd.0002905.s001.xlsx]

## Sheet: Contents
Worksheet Title	Data Descripton	Organism	Associated Figure
2a	Time-course transcript abundance profile (median-centered logFC)	Brugia malayi	Fig. 2 (Cluster P)
2b	Time-course transcript abundance profile (median-centered logFC)	Aedes aegypti	Fig. 2 (Cluster H)
2c	Time-course transcript abundance profile (logFC infected - logFC uninfected)	Aedes aegypti	Fig. 2 (Cluster HR)
2d	Time-course transcript abundance profile (median-centered logFC)	Brugia malayi	Fig. 2 (Cluster C)
3a	Over-represented GO terms (p-value)	Brugia malayi	Fig. 3 (Cluster P)
3b	Over-represented GO terms (p-value)	Aedes aegypti	Fig. 3 (Cluster H)
3c	Over-represented GO terms (p-value)	Aedes aegypti	Fig. 3 (Cluster HR)
4	Time-course transcript abundance profile (logFC during infection of LVP - logFC during infection of RED)	Brugia malayi	Fig. 4
5a	Life-cycle transcript abundance profile (median-centered logFC) and mosquito stage-enriched expression pattern (FDR)	Brugia malayi	Fig. 5
5b	Over-represented GO terms among the mosquito stage-enriched genes (p-value)	Brugia malayi	Fig. 5
5c	Over-represented KEGG pathways among the mosquito stage-enriched genes (p-value)	Brugia malayi	Fig. 5
5d	Putative secreted proteins among the mosquito stage-enriched genes	Brugia malayi	Fig. 5

## Sheet: 2a
Gene ID	Gene Description	Cluster	Day 1	Day 2	Day 3	Day 4	Day 5	Day 6	Day 7	Day 8	Range	FDR
Bm1_00005	hypothetical protein		-1.29755	0.452452	0.0674982	0.3096	-0.209042	-0.308217	0.356039	-0.0674982	1.75	0.434611
Bm1_00010	C2 domain containing protein		-2.19638	0.711868	0.519936	0.341138	0.122837	-0.142591	-0.122837	-0.820792	2.90825	0.347568
Bm1_00015	Homeobox protein Nkx-6.1		0	0	0	0.701768	0	0	0	0.719329	0.719329	0.143793
Bm1_00020	hypothetical protein	P11	-3.12893	-1.46246	-0.414236	-0.00257515	0.00257515	1.33396	3.88031	3.68266	7.00923	3.14181e-101
Bm1_00025	tailless protein		-0.247517	-0.247517	-0.247517	0.0266373	-0.0266373	0.0449523	1.24198	0.470253	1.48949	0.0760214
Bm1_00035	hypothetical protein	P3	-1.62172	-1.62172	1.98068	0.00640143	0.801738	1.14805	-0.00640143	-0.0898738	3.6024	6.23138e-06
Bm1_00065	Cathepsin L-like precursor	P10	-0.120078	-0.120078	-0.120078	-0.120078	0.120078	2.96543	6.43849	7.57853	7.6986	1.59825e-239
Bm1_00070	myosin head (motor domain) containing protein	P2	-0.937573	-0.937573	1.79591	-0.937573	1.72041	2.35847	0.230453	-0.230453	3.29604	1.85462e-13
Bm1_00075	Solute carrier family 35 member E1		-0.901777	0.158485	-0.0577301	-0.397482	0.437728	0.0594283	-0.0690994	0.0577301	1.3395	0.905067
Bm1_00080	MGC82645 protein	P8	-2.39394	-1.33195	-1.55421	0.0365721	0.581036	0.50651	0.686908	-0.0365721	3.08085	0.00126784
Bm1_00085	translation initiation factor 3 subunit 7		0.277051	0.865391	0.532622	0.074454	-0.074454	-0.382815	-0.498851	-0.825827	1.69122	0.0129638
Bm1_00095	Cathepsin L-like precursor	P10	-0.220815	-0.220815	-0.220815	-0.220815	0.220815	3.01461	5.15207	4.10615	5.37288	3.08742e-63
Bm1_00100	AT hook motif family protein		0.194196	-0.434298	-0.0315171	-0.259934	-0.367982	0.225165	0.0315171	0.129095	0.659462	0.826186
Bm1_00110	hypothetical protein		-2.12061	-2.12061	-1.27686	-0.146485	0.471825	0.244602	0.146485	0.310623	2.59244	0.0362489
Bm1_00115	hypothetical protein		-0.802155	1.28514	0.0420233	-0.100287	-0.0420233	0.263044	0.419009	-0.409894	2.0873	0.613315
Bm1_00120	ATP synthase epsilon chain, mitochondrial		-1.58356	-0.113311	0.17048	-0.208151	0.113311	-0.385465	0.206272	0.173192	1.78984	0.334895
Bm1_00130	Protein kinase domain containing protein		-0.0741309	-0.434557	-0.335675	-0.0954126	0.498325	0.449828	1.01154	0.0741309	1.4461	0.0406003
Bm1_00135	regulator of G-protein signaling rgs-7	P5	-3.46791	0.97072	0.612422	0.555321	-0.115806	-0.320312	-0.428609	0.115806	4.43863	0.000930235
Bm1_00140	Cell division protein	P16	-0.311003	0.442173	0.492212	0.0883733	0.258653	-0.0883733	-0.862724	-0.867071	1.35928	4.85811e-10
Bm1_00150	hexokinase type II		-0.562217	-0.562217	-0.562217	0.739547	0.357973	0.189608	-0.13373	0.13373	1.30176	0.461548
Bm1_00160	hypothetical protein		2.16987	-0.00618068	-0.828375	0.298292	0.00618068	0.221015	-0.963425	-1.28106	3.45093	0.0208487
Bm1_00165	KE2 family protein		-1.19944	0.554026	0.0189266	0.481177	-0.17656	-0.0189266	-0.543023	0.0506274	1.75347	0.178935
Bm1_00170	DNA-directed RNA polymerase II 7.6 kDa polypeptide		0.2693	0.596974	0.155114	-0.328591	0.0997135	-0.0997135	-0.598164	-0.472817	1.19514	0.0775517
Bm1_00175	LITAF-like protein		0.128815	-0.653205	-0.263845	0.542109	-0.128815	0.456527	0.50809	-0.3823	1.19531	0.294062
Bm1_00180	DnaJ chaperonine	P15	0.782655	0.645888	0.270511	-0.0590158	0.0590158	-0.209586	-0.967579	-0.982021	1.76468	9.4638e-17
Bm1_00185	40S ribosomal protein S26		1.46226	-0.995547	-0.151166	0.530657	0.151166	0.36262	-0.421092	-0.604191	2.4578	0.337204
Bm1_00190	hypothetical protein		-1.30083	-1.30083	-1.30083	0.226797	0.426262	0.112081	0.408605	-0.112081	1.72709	0.170589
Bm1_00195	40S ribosomal protein S26		-0.331004	0.733914	0.164764	-0.057742	-0.115849	0.953635	-0.137464	0.057742	1.28464	0.361962
Bm1_00200	hypothetical protein		0	0	0	0.503799	0	0.311071	0	0	0.503799	0.551988
Bm1_00205	ShTK domain containing protein	P8	-3.21604	-3.21604	-3.21604	-0.677788	0.677788	2.44238	3.52945	3.00709	6.74549	2.16332e-78
Bm1_00210	hypothetical protein		0	1.05943	0	0	0.220498	0	0	0.390953	1.05943	0.429507
Bm1_00215	hypothetical protein		-0.489552	0.574133	-0.0149543	0.0149543	0.430497	-0.335533	-0.489552	0.459012	1.06369	0.256497
Bm1_00225	protein ZC84.6	P3	-0.847633	-0.847633	2.63582	-0.343835	0.343835	1.84521	1.09095	-0.454115	3.48345	5.78413e-09
Bm1_00230	Helix-loop-helix DNA-binding domain containing protein	P6	-3.16108	-0.247494	-0.449073	0.247494	-0.586365	0.343117	1.342	1.67291	4.83399	3.08179e-12
Bm1_00235	hypothetical protein	P7	-1.04573	-1.04573	0.0894449	-0.0144006	-0.430999	0.0144006	1.56683	2.05056	3.09628	4.69807e-08
Bm1_00240	hypothetical protein		0	0	0	0	0	0.309614	0.394579	0.961003	0.961003	0.266539
Bm1_00245	hypothetical protein		0	0	0	0	0.76007	0.171784	0	0.39224	0.76007	0.298216
Bm1_00255	Notch signaling pathway homolog protein 1		0.524665	0.302632	0.0936514	-0.19306	-0.298274	-0.510404	-0.0936514	0.534423	1.04483	0.0282676
Bm1_00260	Protein set-1		0.468729	-0.15489	-0.320212	0.594789	0.295794	0.15489	-0.679528	-0.398383	1.27432	0.0523095
Bm1_00265	hypothetical protein		-0.214473	-0.754878	-0.124703	0.145999	0.237054	0.124703	0.406052	-0.176222	1.16093	0.152074
Bm1_00270	ImpB/MucB/SamB family protein	P15	1.21524	-0.158588	0.28132	0.318024	0.158588	-0.400189	-1.0384	-0.993015	2.25364	0.000951541
Bm1_00275	S-phase kinase-associated protein SKR-1		-1.94748	0.025129	-0.243015	-0.00306209	-0.153902	0.00306209	0.193761	0.202881	2.15036	0.041683
Bm1_00280	2-oxoisovalerate dehydrogenase alpha subunit, mitochondrial precursor		-0.886766	-0.0601543	0.0601543	0.58945	0.238834	-0.231718	-0.414764	0.359789	1.47622	0.0703932
Bm1_00290	Zinc finger, C2H2 type family protein		0	0	0.491678	0	0	0.311147	0	0	0.491678	0.618845
Bm1_00295	hypothetical protein		0	0	0	0	0	0.153879	0.22728	0.390953	0.390953	0.855344
Bm1_00300	Olfactomedin-like domain containing protein		-2.20136	0.709989	0.324379	-0.0145002	-0.0039636	0.0039636	0.103446	-0.143742	2.91134	0.83389
Bm1_00305	protein F46F5.4	P7	-1.87663	-1.87663	-0.300312	-0.0656936	0.115312	0.0920698	1.28632	0.0656936	3.16295	0.00127399
Bm1_00315	hypothetical protein	P11	0	0	0	0	0	0.309696	1.5254	1.36326	1.5254	0.000192214
Bm1_00320	protein R52.2		0	0	0	0	0.443556	0	0.551988	0	0.551988	0.323266
Bm1_00330	hypothetical protein		-1.70951	-1.70951	0.0502185	0.263696	-0.0550619	0.16592	-0.0502185	0.106029	1.97321	0.663701
Bm1_00335	glutamate-gated chloride channel alpha3A subunit		-0.585604	-0.945342	-0.615931	0.0547177	-0.0547177	0.41842	0.839996	0.165524	1.78534	0.0153642
Bm1_00340	MH1 domain containing protein		1.11202	-0.111019	-0.451091	-0.229912	-0.385233	0.111019	0.134531	0.322825	1.56311	0.694613
Bm1_00345	hypothetical protein		-2.26917	0.150047	0.671153	0.633431	0.00446688	-0.21499	-0.277728	-0.00446688	2.94032	0.244829
Bm1_00350	succinyl-CoA ligase	P5	-1.21006	0.318574	0.124931	0.042847	0.16324	-0.042847	-0.54484	-0.981377	1.52863	1.1112e-06
Bm1_00355	Guanine nucleotide-binding protein alpha-12 subunit		-0.771285	-0.771285	-0.771285	0.950448	0.90005	-0.183001	0.585819	0.183001	1.72173	0.0334162
Bm1_00360	hypothetical protein		0.749889	-0.181675	0.138064	0.369908	0.0540439	-0.348715	-0.0540439	-0.499736	1.24963	0.50186
Bm1_00365	transcription factor E2F3		-1.61368	-0.634724	0.172371	-0.00521321	0.129963	0.0773664	-0.269736	0.00521321	1.78605	0.465192
Bm1_00370	hypothetical protein		0.338733	0.389464	-0.439421	-0.00673192	0.00673192	0.0416328	-0.247577	-0.23542	0.828885	0.804258
Bm1_00375	Centromere/kinetochore Zw10 family protein		0.0956966	0.0151306	0.313879	0.125079	-0.0151306	-0.0770728	-0.131376	-0.384633	0.698512	0.157573
Bm1_00390	CG1676-PA		0.745992	0.186375	0.0184843	-0.0184843	-0.0460208	0.0209329	-0.242217	-0.187512	0.988209	0.632067
Bm1_00395	hypothetical protein	P4	-0.379452	-0.379452	0.105806	-0.105806	-0.379452	1.95944	0.561282	0.327647	2.3389	1.71693e-07
Bm1_00400	U5 snRNP-associated 102 kDa protein	P3	-0.318867	-0.0860117	0.296074	-0.107541	0.0860117	0.839227	0.111156	-0.161043	1.15809	3.81246e-05
Bm1_00405	LP10852p		1.55206	-0.275849	-0.0917017	0.294452	-0.0575776	0.0268509	0.0334477	-0.0268509	1.82791	0.232429
Bm1_00410	hypothetical protein	P10	-0.645183	-0.645183	-0.645183	-0.37167	0.37167	2.27711	3.79353	5.09211	5.7373	7.51748e-35
Bm1_00415	hypothetical protein		-0.514431	-0.514431	-0.0366436	-0.514431	1.00049	0.0515096	0.0366436	0.19923	1.51492	0.0937441
Bm1_00420	hypothetical protein		-0.0754983	-0.0754983	0.421361	-0.0754983	0.138351	0.0754983	-0.0754983	0.866831	0.942329	0.396805
Bm1_00425	KMQK697		-0.736429	-0.273976	0.220548	-0.0247907	-0.121431	0.230958	0.0247907	0.473078	1.20951	0.797141
Bm1_00430	hypothetical protein		-0.199812	0.865662	-0.199812	0.674901	-0.199812	0.210243	0.199812	-0.199812	1.06547	0.35407
Bm1_00440	Protein C21B10.09 in chromosome II		-1.82414	-0.763707	0.24037	-0.103069	0.103069	0.158453	-0.120447	0.112863	2.06451	0.92453
Bm1_00445	calcyclin binding protein-like	P15	0.364066	0.0035513	-0.0035513	0.12224	0.0923575	-0.0231259	-0.711376	-0.608855	1.07544	0.00387627
Bm1_00450	aminomethyltransferase		-3.58508	0.226612	0.493158	-0.391366	-0.0862021	-0.207403	0.0862021	0.149891	4.07823	0.130848
Bm1_00455	RAMP4-2	P2	0.268941	-0.157051	0.386377	-0.426319	0.0441767	-0.0441767	0.444962	-0.977418	1.42238	0.00358824
Bm1_00460	DNL zinc finger family protein		0.586192	0.186304	0.302146	-0.240848	-0.0326594	-0.283294	0.0326594	-0.0563981	0.869486	0.89741
Bm1_00470	Protein-tyrosine phosphatase containing protein	P6	-0.847251	1.24364	0.282706	-0.847251	-0.405161	-0.282706	1.44036	1.32019	2.28761	3.21826e-07
Bm1_00475	PH domain containing protein	P6	-1.63654	-0.131169	-0.0627922	-0.0494191	0.0494191	0.954629	2.61549	2.69738	4.33392	4.17296e-89
Bm1_00480	hypothetical protein	P6	-1.77812	-0.0298687	-0.459567	0.153226	0.0298687	-0.535805	0.510632	1.68864	3.46676	5.95068e-17
Bm1_00485	hypothetical protein	P12	-0.532389	-0.532389	-0.532389	0.168797	0.079162	-0.079162	0.201131	1.80275	2.33514	0.00612591
Bm1_00490	CEH-25 homeobox protein		-0.448822	-0.481384	-1.31651	0.293341	0.608584	0.138467	-0.0924827	0.0924827	1.9251	0.0439135
Bm1_00500	hypothetical protein		-1.4326	-0.369653	0.336663	0.684361	0.0446327	0.214017	-0.0446327	-0.0671678	2.11696	0.831466
Bm1_00505	hypothetical protein	P13	1.03882	-1.41022	-1.41022	-1.13636	-0.248257	0.248257	2.49023	2.55076	3.96097	2.63894e-31
Bm1_00510	LD21614p	P16	0.646879	1.29598	0.249604	-0.507781	0.0221446	-0.0221446	-1.41158	-0.639081	2.70756	0.00982888
Bm1_00520	hypothetical protein	P12	0	0	0	0	0	0.317429	0.960459	1.82001	1.82001	0.000495556
Bm1_00525	hypothetical protein		-1.15781	-1.15781	-0.00779446	0.259123	0.0932849	0.237476	-0.211624	0.00779446	1.41693	0.833259
Bm1_00530	Rho-GTPase-activating		-2.95228	0.617983	0.0789779	0.0284053	-0.34822	0.0999674	-0.0284053	-0.147532	3.57027	0.59021
Bm1_00535	RhoGAP domain containing protein		-2.00918	0.178418	-0.157636	0.344973	-0.132463	-0.104189	0.104189	0.302364	2.35415	0.252624
Bm1_00540	prolyl oligopeptidase family protein	P5	-0.410412	0.337535	0.274593	0.219291	0.241973	-0.219291	-0.560185	-0.821677	1.15921	1.13933e-05
Bm1_00545	T-complex protein 1, zeta subunit	P16	0.287096	0.478095	0.297535	-0.0279238	0.0279238	-0.241102	-1.13601	-1.54526	2.02336	8.46968e-27
Bm1_00550	Lipase family protein	P4	-1.95027	-1.95027	-1.09823	1.45619	-1.72247	2.73286	2.85376	1.09823	4.80403	3.41314e-25
Bm1_00555	astacin protease protein 30	P9	-0.682013	-0.682013	-0.682013	1.56626	-0.682013	1.21775	2.03846	0.682013	2.72048	4.81723e-05
Bm1_00565	hypothetical protein		-1.59377	-0.532586	-1.10963	0.300149	0.222251	0.0610194	0.0874176	-0.0610194	1.89392	0.500354
Bm1_00575	DOMON domain containing protein	P2	-2.86833	-0.776652	0.584422	-1.05782	0.278757	2.45007	0.19918	-0.19918	5.3184	5.94356e-34
Bm1_00580	grainyhead transcription factor	P7	-1.78014	-1.78014	-0.19254	0.19254	-0.232975	0.525166	1.36905	0.575929	3.14919	0.00170207
Bm1_00585	zgc:55839		0.23401	0.197047	-0.308441	-0.801982	-0.943641	-0.197047	0.299997	0.211728	1.24364	0.221616
Bm1_00590	hypothetical protein		-0.86511	-0.86511	-0.38578	-0.162513	0.162513	0.473798	1.30262	0.670029	2.16773	0.0282676
Bm1_00600	hypothetical protein		-3.00236	-0.315753	-1.08512	0.590845	0.19144	0.462271	0.558754	-0.19144	3.5932	0.0102089
Bm1_00615	adenylate cyclase, type IX	P6	-5.13171	-1.31998	-1.49315	0.162394	-0.0905895	0.0905895	1.28873	1.43345	6.56517	1.81818e-37
Bm1_00620	hypothetical protein		-0.0788008	-0.0788008	0.765056	0.424997	0.14914	0.0788008	-0.0788008	-0.0788008	0.843857	0.481831
Bm1_00630	polyprotein		-0.113542	-0.113542	-0.113542	0.390256	0.113542	-0.113542	0.834455	0.599681	0.947997	0.139687
Bm1_00635	hypothetical protein		-0.417588	0.645595	-0.417588	0.615171	-0.00242497	0.542969	0.00242497	-0.417588	1.06318	0.277699
Bm1_00640	hypothetical protein		-1.24191	0.853683	0.664384	-0.0704852	0.359721	0.0704852	-0.53341	-0.290578	2.09559	0.513864
Bm1_00645	Transmembrane cell adhesion receptor mua-3 precursor	P11	0.207944	-1.18249	-1.75915	0.487031	-0.207944	-0.936723	2.36402	3.39417	5.15331	1.40134e-40
Bm1_00650	microfilarial sheath protein, identical		-0.280288	0.778846	0.564318	-0.280288	0.126507	0.0514401	-0.0514401	-0.280288	1.05913	0.533821
Bm1_00655	myosin heavy chain, nonmuscle type 1	P5	-0.732285	0.0750687	0.509758	0.268463	0.335338	-0.0750687	-0.392117	-0.415401	1.24204	3.88465e-05
Bm1_00660	2700029M09Rik protein	P15	0.669757	0.14498	0.111258	0.208079	-0.111258	-0.417048	-1.08217	-1.02957	1.75193	3.61687e-07
Bm1_00665	Fibronectin type III domain containing protein	P5	-2.71217	0.393583	-0.782726	-0.0740735	1.253	2.72751	-0.0236996	0.0236996	5.43968	9.97043e-33
Bm1_00670	hypothetical protein		-1.64155	-1.64155	0.27563	0.946936	0.824809	0.48904	-0.27563	-0.277645	2.58848	0.0161255
Bm1_00675	nudE nuclear distribution gene		0.0187697	0.140099	-0.220771	0.129693	-0.0214177	-0.0187697	-0.094769	0.113939	0.36087	0.978952
Bm1_00680	Ras-related protein Rac1		0.514533	0.624169	0.0398396	0.0178165	-0.0178165	-0.0558091	-0.278289	-0.215271	0.902458	0.313921
Bm1_00685	C2 domain containing protein		-0.908985	-0.20213	0.0201429	0.0070239	0.0320844	0.0560962	-0.0070239	-0.0253826	0.965081	0.983922
Bm1_00690	transporter		0.275811	-0.0861631	-0.255854	0.0492497	0.179847	-0.0492497	0.100723	-0.58934	0.86515	0.338471
Bm1_00695	nucleolar RNA-associated protein alpha	P16	-0.0378765	0.845844	0.594978	0.0378765	0.0564833	-0.520441	-0.900592	-1.39203	2.23787	5.74575e-19
Bm1_00700	RNA, U transporter 1		2.16255	0.233872	0.142672	-0.334988	-0.14928	-0.142672	0.190374	-0.267981	2.49754	0.0293067
Bm1_00715	RE35942p	P6	-3.71191	-0.0154301	-2.57139	-0.767693	0.0851787	0.33835	0.0154301	0.0684292	4.05026	1.0802e-05
Bm1_00720	hypothetical protein		-0.490583	1.17409	-0.490583	-0.216608	0.274351	-0.490583	0.591513	0.216608	1.66467	0.0335205
Bm1_00730	hypothetical protein		0	0	0.473915	0	0	0	0.19682	0	0.473915	0.719928
Bm1_00735	hypothetical protein	P10	0	0	0	0	0	1.88873	4.38672	2.87647	4.38672	3.83296e-34
Bm1_00740	hypothetical protein	P8	-2.11061	-2.11061	-1.63039	-0.299524	0.55642	0.299524	1.50645	0.632687	3.61705	5.31565e-08
Bm1_00745	abnormal cell lineage protein 10 (Protein lin-10)	P6	-2.78237	-0.0959309	-0.470491	-0.193517	0.0959309	0.497361	1.17828	0.980644	3.96065	3.82674e-05
Bm1_00750	RhoGEF domain containing protein		1.07945	0.337376	0.194671	-0.128415	-0.273322	-0.0904704	0.0904704	-0.413601	1.49306	0.782646
Bm1_00755	Variant SH3 domain containing protein		-0.455601	-0.455601	0.0331693	-0.455601	0.0185573	-0.0185573	0.115149	0.251709	0.70731	0.774093
Bm1_00760	hypothetical protein		-1.67443	-0.554741	-0.152141	0.569019	0.152141	0.195412	0.295763	-0.452865	2.24345	0.0155175
Bm1_00765	hypothetical protein		-2.28736	0.621572	0.952709	-0.23929	-0.250191	0.0344987	0.0219657	-0.0219657	3.24007	0.247275
Bm1_00780	hypothetical protein		-0.335925	-0.335925	0.529602	0.168768	0.584467	0.141397	-0.141397	-0.335925	0.920392	0.601619
Bm1_00785	hypothetical protein		-0.433187	-2.88568	0.656905	0.132826	0.28338	-0.123942	-0.0428078	0.0428078	3.54259	0.0538305
Bm1_00790	PH domain containing protein		0.574442	0.213964	-0.300199	0.49547	0.135138	-0.662282	-0.135138	-1.17003	1.74447	0.0773013
Bm1_00795	E1-E2 ATPase family protein	P6	-1.69865	-0.230077	0.123112	0.382581	-0.123112	-0.369315	0.352995	0.779771	2.47842	0.00774501
Bm1_00800	hypothetical protein		1.83683	-0.606744	-0.606744	0.425537	-0.19458	-0.0558165	0.0558165	0.0911658	2.44358	0.479559
Bm1_00805	MRG family protein		0.836664	0.00574637	0.13243	0.0817189	-0.00574637	-0.117343	-0.42238	-0.366996	1.25904	0.389428
Bm1_00810	Variant SH3 domain containing protein		0.502957	0.285643	0.216946	-0.0136608	0.0136608	-0.25579	-0.176796	-0.102878	0.758747	0.304318
Bm1_00815	Cuticle collagen 14	P10	0.311725	-1.11656	-1.47872	-0.311725	-1.71716	2.62947	4.86778	2.7818	6.58494	1.66908e-110
Bm1_00820	RIKEN cDNA 2700023J09		-0.475921	0.587648	0.383477	0.0285581	-0.0285581	0.0746615	-0.10515	-0.0740097	1.06357	0.978952
Bm1_00825	hypothetical protein	P10	-0.631488	-0.631488	-0.147582	-0.357637	0.147582	1.51997	2.8318	2.47174	3.46329	4.94327e-18
Bm1_00830	Aminopeptidase ZK353.6 in chromosome III		-0.479181	-0.066544	-0.127508	0.19827	0.325554	0.191907	0.066544	-0.615821	0.941376	0.00282101
Bm1_00840	succinyl-CoA ligase	P5	-1.28978	-0.297757	0.216663	0.211605	0.193944	0.168845	-0.168845	-0.593869	1.50645	0.00198786
Bm1_00845	hypothetical protein		0	0	0	0	0	0.41789	1.14359	0.402245	1.14359	0.0679151
Bm1_00850	hypothetical protein	P1	-1.17065	-0.109728	0.400531	-0.468644	-0.126958	0.109728	1.36378	1.34504	2.53442	0.000800749
Bm1_00855	hypothetical protein		0	0	0	0	0	0.153507	0.19682	0	0.19682	0.911732
Bm1_00860	Transcription factor IIA, alpha/beta subunit family protein	P12	-1.00728	-0.418861	0.439722	0.222655	-0.296381	-0.0886144	0.0886144	1.43271	2.43998	1.47236e-10
Bm1_00865	excretory/secretory protein Juv-p120 precursor		0	0	0	0	0	0.173881	0.425943	0	0.425943	0.737387
Bm1_00870	cathepsin L-like precursor	P11	0	0	0	0	0	0.565518	2.78349	3.73085	3.73085	8.00965e-22
Bm1_00875	Notch signaling pathway homolog protein 1		-0.351809	0.712424	-0.351809	-0.078473	0.0972102	-0.199018	0.078473	0.343441	1.06423	0.796437
Bm1_00885	Immunoglobulin I-set domain containing protein		-1.2945	-0.479267	0.202129	0.155495	0.215847	0.0642892	-0.0642892	-0.247124	1.51035	0.0343135
Bm1_00895	von Willebrand factor type A domain containing protein	P11	-3.81917	-2.1517	-3.81917	0.727719	0.771985	-0.727719	3.74253	4.63702	8.45619	2.42529e-133
Bm1_00900	Voltage-gated potassium channel, Shaw-family (KCNC, Kv3-like) alpha-subunit		-1.59615	-1.59615	-1.59615	0.0313229	0.0180891	-0.0180891	0.228152	0.0914016	1.8243	0.108214
Bm1_00905	Voltage-gated potassium channel, Shaw-family (KCNC, Kv3-like) alpha-subunit		-0.300815	-0.300815	0.184686	0.401185	0.141906	-0.141906	0.251822	-0.300815	0.701999	0.701759
Bm1_00910	Zinc finger, C2H2 type family protein	P11	-0.461151	-0.461151	0.0192234	-0.187263	-0.0192234	0.508557	5.53866	4.80572	5.99981	1.61618e-96
Bm1_00915	hypothetical protein		0.434	0.0729286	0.285581	-0.123897	0.662425	-0.167875	-0.269054	-0.0729286	0.931479	0.512419
Bm1_00920	Hypothetical 30.5 kDa protein ZK1321.3 in chromosome II, putative		0.065436	-0.716504	-0.188687	-0.065436	0.151755	-0.0857588	0.169412	0.128163	0.885916	0.978678
Bm1_00925	pfAARP2 protein		-0.579571	-0.579571	0.561924	-0.579571	0.24835	-0.24835	0.277876	0.399427	1.14149	0.330264
Bm1_00930	Hypothetical UPF0028 protein ZK370.4 in chromosome III, putative		-0.897189	-0.173707	0.0127906	-0.0428085	0.0428114	0.442998	0.36052	-0.0127906	1.34019	0.254317
Bm1_00935	myosin heavy chain B (MHC B)	P1	-5.0835	-2.99185	-1.44452	-0.367826	0.367826	1.72846	3.80242	3.99328	9.07679	3.11826e-192
Bm1_00950	hypothetical protein		-0.112539	-0.112539	0.37768	0.39126	-0.112539	-0.112539	0.112539	0.288873	0.503799	0.569644
Bm1_00955	Protein kinase domain containing protein		-1.3264	-0.265311	-0.845923	0.484102	-0.281638	0.836323	0.265311	0.488509	2.16273	0.0927342
Bm1_00960	hypothetical protein		-0.33678	0.725855	-0.33678	-0.0627825	-0.0860598	0.217714	0.214583	0.0627825	1.06264	0.833293
Bm1_00965	Eukaryotic-type carbonic anhydrase family protein		-0.70457	-0.70457	-0.70457	-0.00261147	0.570853	1.14246	1.07956	0.00261147	1.84703	0.0130302
Bm1_00975	CUT domain containing protein		-1.21121	-0.150783	1.29279	0.206589	0.650768	0.000107103	-0.000107103	-0.811443	2.504	0.0811311
Bm1_00980	hypothetical protein		0	0	0	0	0	0.173657	0.685	0.69716	0.69716	0.275967
Bm1_00985	hypothetical protein	P10	-0.821759	-0.821759	-0.821759	0.0550108	-0.0550108	1.31172	3.11998	3.51106	4.33282	1.03712e-25
Bm1_00990	Tubulin binding cofactor A family protein		-0.596811	-0.135023	0.694773	0.901778	0.21058	0.0509851	-0.131007	-0.0509851	1.49859	0.0678495
Bm1_00995	hypothetical protein		-0.124936	0.0878313	-0.0610766	0.374676	0.0217899	-0.0217899	0.327581	-0.214314	0.588989	0.122607
Bm1_01005	hypothetical protein		0	0	0	0	0	0.174358	0.19682	0	0.19682	0.910687
Bm1_01010	guanine nucleotide-binding protein G-o protein alpha subunit, putative	P1	-2.2019	-1.14086	-0.629516	0.111559	-0.111559	0.937174	1.13332	1.14859	3.35049	0.000124629
Bm1_01015	phosphatase-like		0	0	0.491247	0	0.260275	0	0.370349	0	0.491247	0.621015
Bm1_01020	hypothetical protein	P11	-0.958685	-0.398869	-0.0671675	0.0671675	-0.0970111	0.290837	1.38816	1.64039	2.59908	7.02748e-35
Bm1_01030	hypothetical protein		-1.88691	-0.8266	-0.293957	0.233184	0.0465721	-0.0465721	0.706715	0.647229	2.59362	0.451483
Bm1_01035	hypothetical protein	P13	-0.0165953	-1.13996	-0.525887	0.0165953	-0.45834	0.952768	0.956151	1.15069	2.29065	9.68025e-30
Bm1_01040	hypothetical protein	P14	1.89915	1.32299	0.114547	0.350242	-0.114547	-1.20571	-0.905192	-0.43819	3.10486	6.82332e-09
Bm1_01045	hypothetical protein		-0.353716	-0.353716	0.11768	-0.0804365	0.52662	0.173014	0.0804365	-0.353716	0.880336	0.735509
Bm1_01050	1810045K07Rik protein	P11	0.724732	1.19321	0.74306	0.328126	-1.45793	-1.5641	-0.361975	-0.328126	2.75731	8.58908e-05
Bm1_01055	hypothetical protein		0	1.0639	0	0	0	0	0.228115	0	1.0639	0.516846
Bm1_01060	Calcium-binding protein	P1	-3.92249	-2.25602	0.0437593	-0.1413	-0.0437593	1.08803	1.59444	1.65145	5.57394	6.37207e-23
Bm1_01065	Protein kinase domain containing protein		-0.450447	-0.450447	-0.450447	0.251245	0.25325	0.261107	0.0618886	-0.0618886	0.711554	0.858119
Bm1_01070	Ammonium Transporter Family protein	P5	-5.94276	-0.466079	-0.297925	0.297925	0.427179	0.6974	0.49094	-0.686978	6.64016	4.44028e-12
Bm1_01080	Laminin related. see also lmb- protein 1	P5	-1.5933	-0.0070218	0.0157328	-0.036935	0.164299	0.00291568	-0.00291568	0.0381788	1.7576	0.00556021
Bm1_01085	hypothetical protein		-2.07738	-0.411728	0.726991	0.511526	0.121141	-0.121141	0.1785	-0.262065	2.80437	0.410121
Bm1_01090	hypothetical protein		0	0	0	0.274185	0	0	0	0.390633	0.390633	0.706413
Bm1_01095	env-like protein		-0.198431	-0.198431	-0.198431	0.0755612	0.0290187	-0.0290187	0.634442	0.201038	0.832873	0.586509
Bm1_01100	hypothetical protein		-0.137028	-0.137028	0.351711	0.137028	-0.137028	-0.137028	0.714326	0.255565	0.851354	0.201551
Bm1_01105	hypothetical protein		-2.78696	-0.366474	0.0158886	0.830544	-0.0158886	0.069209	-0.195037	0.0815015	3.61751	0.210254
Bm1_01130	hypothetical protein		0	0	0	0	0.446036	0.686214	1.40333	0	1.40333	0.0186135
Bm1_01135	hypothetical protein	P6	-1.49897	-0.438404	-0.655093	0.223685	-0.223685	0.757019	2.34146	2.37653	3.8755	3.12438e-11
Bm1_01140	hypothetical protein	P4	-1.45588	-0.476366	0.0980764	-0.288519	-0.0980764	1.28978	1.54238	1.41355	2.99825	2.05629e-17
Bm1_01145	hypothetical protein		-1.15106	-1.15106	-0.676919	0.0230866	0.0245683	-0.0230866	0.184274	0.204457	1.35552	0.794303
Bm1_01150	DHHC zinc finger domain containing protein		-1.49226	0.0765429	0.20781	0.0401409	-0.0656733	0.206343	-0.0401409	-0.2532	1.70007	0.802837
Bm1_01170	hypothetical protein		1.09881	-0.460384	0.443312	-0.162604	-0.0540898	0.119551	-0.127988	0.0540898	1.55919	0.778815
Bm1_01175	AVO3		-1.35221	-0.289192	0.22257	0.541257	-0.711977	0.348571	0.158295	-0.158295	1.89346	0.508692
Bm1_01180	DB module family protein	P9	-3.28062	-2.21863	-1.53241	1.18493	-1.18493	2.70258	3.55037	2.05392	6.83099	5.72485e-69
Bm1_01185	hypothetical protein		-1.51459	-0.26857	0.327117	0.357359	-0.0477222	0.0477222	0.110278	-0.0987814	1.87195	0.572718
Bm1_01190	hypothetical protein		-2.26406	-0.172222	0.625849	0.421064	0.0932625	0.00447019	-0.285823	-0.00447019	2.8899	0.529906
Bm1_01235	Tropomyosin	P7	-4.49562	-3.43376	-2.07407	-0.365944	0.365944	1.79443	3.48026	3.58784	8.08347	4.49901e-137
Bm1_01260	hypothetical protein	P9	-0.912013	-0.912013	-0.0682054	0.504873	-0.487721	0.0682054	1.42308	1.53283	2.44485	0.000231864
Bm1_01265	P40		-0.108472	-0.108472	0.363667	-0.108472	0.108472	0.419589	-0.108472	0.599137	0.707609	0.472561
Bm1_01270	protein 2	P9	-2.30791	-2.30791	-1.46439	0.0650285	-0.0650285	1.21371	1.96152	0.293917	4.26943	1.43688e-15
Bm1_01275	hypothetical protein		-2.88613	-0.200224	0.455431	0.433455	0.200224	0.433151	-0.404805	-0.828625	3.34156	0.0124318
Bm1_01280	vacuolar protein sorting 55		-3.89296	0.468499	-0.0061265	-0.111356	0.549147	0.408428	0.0061265	-0.34131	4.44211	0.0219331
Bm1_01285	hypothetical protein		-0.414087	0.596129	-0.0118827	0.0419701	0.0368397	-0.0484211	-0.295428	0.0118827	1.01022	0.449969
Bm1_01290	hypothetical protein		0.856558	0.281875	0.153705	0.0586859	-0.0616209	-0.16507	-0.470008	-0.0586859	1.32657	0.434637
Bm1_01295	Fic protein family protein		-1.12494	-0.46871	0.310999	-0.194577	0.186118	0.0662123	0.665603	-0.0662123	1.79055	0.210327
Bm1_01300	Alpha amylase, catalytic domain containing protein	P15	1.72232	1.15555	0.749166	0.0401338	-0.0401338	-0.67942	-1.27707	-1.03243	2.9994	3.67867e-64
Bm1_01310	hypothetical protein		0	0	0	0	0	0.153507	0.228115	0	0.228115	0.910332
Bm1_01315	Zinc finger, C2H2 type family protein		-0.301831	0.762961	0.521362	-0.301831	-0.0331404	0.0331404	0.44127	-0.301831	1.06479	0.438713
Bm1_01320	Inositol polyphosphate kinase family protein	P5	-4.83353	-0.471361	-0.136429	0.209504	0.0314881	-0.0314881	0.12183	0.570351	5.40388	0.00114982
Bm1_01325	hypothetical protein		-0.808745	-0.681958	-0.398276	0.129412	0.0943972	0.0265296	-0.0265296	0.112828	0.938157	0.383955
Bm1_01330	rho guanine nucleotide exchange factor 12		-1.59322	-1.59322	-0.464263	-0.421161	0.421161	0.903282	0.909297	0.763171	2.50252	0.012361
Bm1_01335	T-cell receptor beta chain ANA 11		2.45926	0	0	0	0	0	0.19682	0	2.45926	0.282041
Bm1_01350	RE33889p		-0.0606089	-0.4198	-0.320135	0.680533	0.0606089	0.334054	-0.860682	0.420798	1.54121	0.0427112
Bm1_01355	hypothetical protein		-0.220961	-0.220961	-0.220961	-0.220961	0.220961	0.748742	1.23455	0.743019	1.45551	0.0169796
Bm1_01360	60S ribosomal protein L10		-0.336468	-0.336468	-0.336468	-0.0628939	0.298143	0.635198	0.597705	0.0628939	0.971665	0.43415
Bm1_01365	hypothetical protein		-2.02582	0.65752	0.0535146	-0.0535146	-0.406307	0.130799	-0.0643067	1.00588	3.0317	0.268444
Bm1_01370	alpha-1,3-mannosyltransferase		-2.81885	-0.727108	-0.0204733	0.501493	0.120307	0.264478	0.0204733	-0.461981	3.32034	0.261799
Bm1_01375	hypothetical protein	P10	0	0	0	0	0	0.566175	1.30371	1.67642	1.67642	0.00121611
Bm1_01380	hypothetical protein		-2.19944	0.489288	0.582684	0.050956	0.493076	-0.0639515	-0.050956	-0.65938	2.78212	0.428417
Bm1_01385	hypothetical protein		-0.636385	0.423098	0.504296	0.239462	-0.0607261	-0.103223	-0.0874133	0.0607261	1.14068	0.963043
Bm1_01390	hypothetical protein	P10	-0.872743	-0.872743	-0.872743	-0.368944	0.368944	1.70533	2.12789	0.499053	3.00063	1.96499e-07
Bm1_01395	hypothetical protein		0	0	0	0.273411	0	0.329477	0.226646	0	0.329477	0.845923
Bm1_01415	hypothetical protein		0.0530997	1.10538	0.439614	0.235376	-0.0530997	-0.401508	-0.343436	-0.998278	2.10366	0.0128644
Bm1_01420	hypothetical protein		-4.34646	0.228139	-0.0503508	0.426949	0.0503508	-0.257067	-0.197832	0.246514	4.77341	0.0291114
Bm1_01425	hypothetical protein	P13	-0.381342	-1.80895	-0.677922	0.0648737	0.558753	-0.0648737	0.818509	1.64965	3.4586	1.69177e-20
Bm1_01430	Protein kinase domain containing protein		-1.70126	0.721406	0.497357	0.485273	0.463903	-0.463903	-0.507737	-1.30201	2.42267	0.0218039
Bm1_01435	cell division control protein 2 homolog	P16	0.206795	0.364111	0.283931	0.565244	-0.206795	-0.914576	-1.2621	-1.44102	2.00627	3.43646e-19
Bm1_01440	Uncharacterized hematopoietic stem/progenitor cells protein MDS029		0.28201	0.308092	0.351115	-0.100487	-4.86956e-05	4.86956e-05	-0.50295	-0.262719	0.854066	0.225245
Bm1_01445	tRNA (guanine-N(7)-)-methyltransferase		-3.78587	0.0253889	-0.0105071	0.0385808	0.0105071	-0.101409	-0.211953	0.142352	3.92823	0.548657
Bm1_01450	dnaK protein		-0.220863	0.0548707	-0.0503144	0.092624	0.0503144	0.107599	-0.354739	-0.48274	0.590339	0.147525
Bm1_01455	Ser/Thr protein phosphatase family protein		0	0	0.473915	0	0	0.153507	0	0	0.473915	0.76742
Bm1_01460	Beta-glucuronidase precursor	P10	-1.22355	-1.22355	-0.388401	-0.719754	0.388401	2.10132	3.12013	1.81842	4.34369	3.03522e-16
Bm1_01465	cuticular collagen Bmcol-2	P11	-1.31984	-0.665289	-2.39505	-0.104152	0.226365	0.104152	3.46999	3.44431	5.86505	8.00905e-83
Bm1_01470	Immunoglobulin I-set domain containing protein	P5	-5.65779	-1.54523	-1.38171	0.0825481	0.242461	0.944337	0.707178	-0.0825481	6.60213	1.76473e-29
Bm1_01480	hypothetical protein	P5	-1.99477	0.670277	0.340281	0.502034	0.213311	-0.213311	-0.223911	-0.39775	2.66504	0.00638815
Bm1_01485	Dynamin		0.11347	-0.11347	-0.273003	-0.271593	-0.220222	0.656995	0.642401	0.627417	0.929997	1.1142e-07
Bm1_01490	hypothetical protein	P1	-2.83386	-1.17091	-0.154634	-0.545178	0.184262	0.395327	0.154634	0.446377	3.28024	2.81259e-06
Bm1_01500	hypothetical protein		-0.528099	0.532808	-0.0426488	-0.0245771	1.1997	-0.0891825	0.0245771	0.175227	1.7278	0.0960078
Bm1_01505	hypothetical protein		0	0	0	0.273411	0	0.418416	0	0	0.418416	0.578002
Bm1_01510	phosphoribosyl pyrophosphate synthetase-associated protein, putative		-2.94955	-0.0381991	0.00829272	0.24339	0.237759	-0.185274	-0.00829272	0.340896	3.29045	0.662623
Bm1_01515	hypothetical protein	P1	-2.75669	-0.631396	-0.227145	0.133302	-0.0315534	0.0315534	0.279569	0.674704	3.43139	2.20934e-05
Bm1_01520	GRAM domain containing protein		-0.873624	-0.410018	0.362537	0.344017	-0.0877525	-0.470829	0.0877525	0.481272	1.3549	0.121883
Bm1_01525	hypothetical protein		-3.17357	0.101376	0.222516	-0.192271	0.216844	-0.101376	-0.155583	0.213121	3.39609	0.601774
Bm1_01530	Divalent cation transporter family protein		-4.15998	0.276217	-0.118435	-0.378811	-0.238698	0.118435	0.39949	0.158454	4.55947	0.0200765
Bm1_01535	2-amino-3-ketobutyrate coenzyme A ligase, mitochondrial precursor		-3.72558	-0.620189	0.206646	0.0557407	-0.0557407	0.517	0.0717956	-0.0618656	4.24258	0.0745348
Bm1_01540	proline oxidase, mitochondrial precursor	P5	-0.16305	0.16305	0.404628	0.616389	0.203471	-0.742812	-0.900969	-0.839917	1.51736	7.12967e-15
Bm1_01545	Dual specificity mitogen-activated protein kinase kinase 7. -TRUNCATED-	P2	-0.167361	-0.0471802	0.607162	0.488569	0.607852	0.0471802	-0.181233	-0.876601	1.48445	0.00267422
Bm1_01550	microfilariae surface-associated protein	P12	0.829461	-1.62222	-0.495579	-0.20426	-0.480404	0.20426	1.69417	4.97624	6.59846	2.38894e-97
Bm1_01555	hypothetical protein		0.694905	0.694434	-0.203937	-0.0285135	-0.227948	-0.0761532	0.437163	0.0285135	0.922853	0.0118359
Bm1_01560	hypothetical protein		0.481123	0.511454	-0.0184263	-0.239702	0.0184263	0.0301076	-0.224788	-0.135701	0.751156	0.398481
Bm1_01565	Mitochondrial carrier protein		0.259434	0.449707	0.0920954	-0.520553	0.0439237	-0.116965	-0.0439237	-0.182261	0.970261	0.0991762
Bm1_01570	hypothetical protein		1.03211	-0.360601	0.78289	-0.00259909	0.071015	0.00259909	-0.0521753	-0.241541	1.39271	0.804699
Bm1_01575	TraB family protein		-0.114754	0.278387	-0.0220336	-0.246657	0.0598296	0.0669429	0.0220336	-0.29042	0.568808	0.711658
Bm1_01580	fatty acid elongation protein 3	P16	0.0500533	0.681878	0.398744	-0.0413067	0.0413067	-0.754799	-0.892655	-1.01174	1.69361	2.72949e-12
Bm1_01585	fatty acid elongation protein 3	P16	1.06755	1.29109	0.86164	0.291348	-0.291348	-1.61394	-1.92745	-1.86092	3.21854	7.24094e-83
Bm1_01590	Nuclear hormone receptor family member nhr-19		-1.49498	0.171522	-0.356934	0.989504	0.104018	-0.408163	-0.104018	0.314247	2.48448	0.253507
Bm1_01595	hypothetical protein		-2.86789	-0.776882	0.00365414	0.389813	0.318128	0.269625	-0.0305515	-0.00365414	3.2577	0.477072
Bm1_01600	hypothetical protein		-0.0163006	0.638473	-0.0407799	0.394299	0.613057	0.0163006	-0.372349	-0.5209	1.15937	0.195052
Bm1_01605	hypothetical protein		0.334543	0.600963	0.0883955	0.0308616	-0.0308616	-0.297959	-0.3247	-0.306726	0.925663	0.552456
Bm1_01610	hypothetical protein		-2.09541	-0.430309	0.224789	-0.284434	0.191019	-0.191019	0.509986	0.247951	2.6054	0.595962
Bm1_01615	40S ribosomal protein S24	P5	-0.725048	1.3568	0.640782	0.341298	0.726374	-0.341298	-0.779216	-1.68204	3.03884	5.67104e-30
Bm1_01625	hypothetical protein		1.65855	0.883867	0.0801525	-0.0801525	-0.518579	0.301583	-0.415541	-0.39245	2.17712	0.390126
Bm1_01645	hypothetical protein	P12	-0.576342	0.48551	0.267104	1.05113	-0.576342	-0.267104	-0.363212	2.02171	2.59805	1.91125e-08
Bm1_01650	hypothetical protein		-1.82629	-0.159811	-0.982663	-0.104293	0.104916	0.104293	0.687217	0.919575	2.74586	0.068372
Bm1_01655	Protein kinase domain containing protein		0	0	0	0	0.26248	0	0	0.390633	0.390633	0.733088
Bm1_01660	cytoplasmic polyadenylation element binding protein 3		-1.28705	-0.224505	-0.451286	0.760551	0.189785	0.041383	-0.041383	0.257831	2.0476	0.656599
Bm1_01665	Retinoblastoma-associated protein A domain containing protein	P5	-4.60492	-0.0303094	0.54755	0.526476	0.199546	0.0303094	-0.251239	-0.151748	5.15247	0.00120066
Bm1_01670	cation efflux family protein		-1.07816	0.322223	0.339888	-0.151496	0.100395	0.209491	-0.100395	-0.42861	1.41805	0.1341
Bm1_01675	hypothetical protein		-1.89345	-1.89345	0.648344	-0.171452	-0.0488778	0.40835	0.296816	0.0488778	2.54179	0.231479
Bm1_01680	hypothetical protein		-0.870694	-0.870694	-0.385664	0.161417	-0.0894348	0.105809	0.0894348	0.0935059	1.03211	0.905966
Bm1_01685	Patched family protein		-2.17874	-2.17874	0.241037	0.683357	0.0222184	-0.489059	0.0927531	-0.0222184	2.8621	0.046071
Bm1_01690	Conserved oligomeric Golgi complex component 4		-1.3638	-0.0604938	-0.0170933	0.199653	0.0222246	0.158418	0.0170933	-0.114729	1.56346	0.262265
Bm1_01695	RE11181p		-0.627092	-0.627092	0.502859	0.545283	-0.197337	0.918915	0.197337	-0.232265	1.54601	0.16858
Bm1_01735	UDP-N-acetylglucosamine--peptide N-acetylglucosaminyltransferase		-2.95421	-0.157762	-0.085578	-0.00663979	0.0664996	0.132176	0.199267	0.00663979	3.15347	0.0771111
Bm1_01740	hypothetical protein		0.739269	-0.522495	-0.0244412	0.0244412	0.0386028	0.0432848	-0.0427956	-0.554431	1.2937	0.656599
Bm1_01745	S1 RNA binding domain containing protein	P16	0.134055	0.348768	0.15407	0.119444	-0.119444	-0.578474	-1.2094	-1.64741	1.99618	2.37813e-19
Bm1_01750	DEAD/DEAH box helicase family protein		0.614866	-0.0147823	0.0147823	0.35445	0.133786	-0.286391	-0.980838	-0.535732	1.5957	0.116196
Bm1_01755	CG33184-PD		-3.01362	-0.103068	0.476805	-0.826731	0.103068	-0.277097	0.272895	0.236528	3.49043	0.0622682
Bm1_01760	hypothetical protein		0	0	0	0.274255	0	0	1.23548	0.403934	1.23548	0.0381375
Bm1_01765	Probable mitochondrial import receptor subunit TOM7-like	P16	0.0789392	0.308516	0.181953	-0.0789392	0.119403	-0.569045	-0.646358	-0.926418	1.23493	0.00128032
Bm1_01770	Lin1-like protein	P15	0.51598	0.478449	0.242888	0.183408	-0.183408	-0.445888	-0.884748	-0.734839	1.40073	0.0064897
Bm1_01775	ADP-ribosylation factor 1		-0.33199	0.731925	0.141883	-0.0586158	-0.11237	0.511574	-0.13522	0.0586158	1.06391	0.753616
Bm1_01780	hypothetical protein	P5	-1.4093	-0.346971	-0.572029	0.218956	0.741422	1.35829	-0.218956	0.414599	2.76759	0.00569888
Bm1_01790	indoleamine 2,3-dioxygenase	P8	-2.55032	-2.55032	-0.789352	1.25283	0.601527	-0.0751022	0.0751022	0.256994	3.80315	1.05851e-06
Bm1_01800	hypothetical protein		0.450398	0.0869942	-0.0869942	-0.109933	0.133959	-0.408292	-0.285598	0.333332	0.85869	0.905966
Bm1_01805	60S ribosomal protein L10a	P15	0.586576	0.506134	0.105958	0.0915308	-0.0915308	-0.669995	-1.65185	-2.09578	2.68236	5.34642e-38
Bm1_01810	hypothetical protein		-1.07136	-1.07136	-0.593111	0.903006	1.12055	0.68281	0.593111	-0.677884	2.19191	0.0176173
Bm1_01815	Zinc finger, C2H2 type family protein		0	0	0	0	0	0.418416	0.197868	0	0.418416	0.631416
Bm1_01825	hypothetical protein		0.619215	-0.770473	-0.0804984	-0.110475	-0.104414	0.0804984	0.109593	1.21777	1.98824	0.0831471
Bm1_01830	collagen protein 99	P8	-3.40523	-3.40523	-2.27466	-0.179593	0.179593	0.620132	1.15202	0.498396	4.55725	7.12639e-15
Bm1_01835	Immunoglobulin I-set domain containing protein	P7	-0.989267	-0.989267	-0.508348	-0.287209	0.287209	0.551254	1.34866	1.44769	2.43696	0.000322582
Bm1_01840	Copine VIII	P12	-0.956585	-0.956585	-0.956585	0.0755916	-0.0755916	0.56027	1.10638	2.34314	3.29972	2.68157e-07
Bm1_01845	Copine family protein	P6	-1.54253	0.124497	-0.411825	-0.124497	-0.166202	1.16592	2.28044	3.13711	4.67964	1.20304e-27
Bm1_01850	Hypothetical RING finger protein R06F6.2 in chromosome II, putative		0.105784	0.107743	-0.0637566	-0.0598992	-0.186476	-0.190639	0.278738	0.0598992	0.469377	0.445613
Bm1_01855	ethanolamine-phosphate cytidylyltransferase	P3	0.50656	0.251849	0.591448	0.513201	-0.288314	-0.251849	-0.350324	-0.613935	1.20538	3.96636e-09
Bm1_01860	hypotetical protein, conserved	P6	-4.78652	-0.349485	-0.431499	0.293454	-0.189933	0.189933	1.73872	1.16034	6.52523	1.53789e-23
Bm1_01865	Pol polyprotein		0	0	0	0	0	0.173881	0.22728	0.390953	0.390953	0.854627
Bm1_01870	Glycerophosphoryl diester phosphodiesterase family protein	P6	-0.675951	0.159843	-0.342547	-0.116924	-0.0182232	0.0182232	1.22791	1.076	1.90386	1.24364e-13
Bm1_01875	hypothetical protein	P11	-2.09593	-1.26745	-0.683064	0.038611	-0.038611	0.448928	1.87412	2.03546	4.13138	2.77712e-51
Bm1_01880	hypothetical protein		-2.14833	-1.08735	-0.384719	0.28162	0.0844483	-0.0844483	0.354323	0.210032	2.50265	0.585178
Bm1_01885	Copine family protein	P9	-1.67918	-0.971488	-1.64372	-0.133354	0.133354	1.09404	2.28442	2.63249	4.31167	2.62575e-99
Bm1_01890	Surp module family protein		0.144964	0.200436	0.0933849	0.0424618	-0.0684245	-0.0424618	-0.334496	-0.152738	0.534932	0.477128
Bm1_01900	Cyclase associated protein homolog protein 1, isoform b, putative		-2.04516	-0.984594	0.366241	-1.01226	-0.030372	0.407449	0.564384	0.030372	2.60954	0.0951587
Bm1_01905	CAP protein	P6	-2.20373	-0.958373	-0.833849	-0.123334	0.123334	0.672462	1.28782	1.16309	3.49155	1.6452e-43
Bm1_01910	extracellular sulfatase		0.210226	-0.106197	0.042522	-0.647878	-0.335354	-0.042522	0.0728489	0.170358	0.858104	0.371692
Bm1_01915	Sulfatase family protein	P1	-1.44089	0.00689692	-0.00689692	-0.168165	-0.113572	0.110887	0.547232	0.645191	2.08608	0.00269645
Bm1_01920	CGI-62 protein		-1.09308	-0.0333897	0.0333897	-0.589276	0.744106	0.522139	0.394558	-0.134521	1.83718	0.500892
Bm1_01925	Phosphoglycerate kinase	P1	-2.44713	-1.19735	-0.68499	-0.213361	0.213361	0.872578	1.59508	1.65934	4.10647	5.92496e-63
Bm1_01930	6-phosphofructokinase	P1	-1.23026	-0.179822	-0.0639568	-0.079183	0.0639568	0.358222	0.533689	0.578461	1.80873	4.11983e-06
Bm1_01935	hypothetical protein		-0.288935	0.0949243	0.451574	-0.164473	0.09008	-0.09008	0.192533	-0.295025	0.746599	0.694613
Bm1_01940	metallo-beta-lactamase superfamily protein	P5	-1.10933	0.0105549	-0.0105549	0.0583993	0.124064	0.116461	-0.826168	-1.39972	1.52379	0.00178067
Bm1_01945	Protein kinase domain containing protein		-0.400993	-0.0672861	-0.206907	0.355421	-0.141924	0.0747689	0.174328	0.0672861	0.756413	0.625828
Bm1_01950	Tyrosine-protein kinase F09A5.2 in chromosome X	P8	0.721996	-0.71394	-1.36807	0.735688	0.193134	0.0394697	-0.0394697	-0.540055	2.10376	0.0071092
Bm1_01965	Copper type II ascorbate-dependent monooxygenase, N-terminal domain containing protein	P7	-2.01553	-2.01553	-0.642874	-0.122033	0.122033	0.47181	1.29542	1.46901	3.48454	4.73609e-06
Bm1_01990	chitin synthase 2 (chs-2) fragment		-0.134105	-0.134105	-0.134105	-0.134105	0.134105	0.177565	1.12741	0.822873	1.26151	0.118513
Bm1_02005	SNF7 family protein		0.30215	0.573174	0.547797	-0.129609	0.121902	-0.264065	-0.321151	-0.121902	0.894324	0.0442
Bm1_02010	spermatogenesis associated 11		-2.48681	0.425675	-0.176242	-0.367738	0.0458271	0.427222	0.293511	-0.0458271	2.91403	0.547879
Bm1_02015	Choline/Carnitine o-acyltransferase family protein	P6	-1.9146	-0.0236716	-0.62182	-0.279123	0.0236716	1.38031	2.17223	1.94901	4.08682	1.26285e-58
Bm1_02020	hypothetical protein		-0.428894	-0.0722335	-0.343541	0.220947	0.0722335	0.158754	0.318121	-0.0972743	0.747015	0.753336
Bm1_02025	Cyclin, N-terminal domain containing protein	P9	-0.457257	0.370257	0.114909	0.872188	0.139377	-0.50594	-0.114909	-0.466386	1.37813	0.00607716
Bm1_02030	hypothetical protein		0	0	0	0.273396	0	0.292148	0	0	0.292148	0.747094
Bm1_02035	ThiF family protein		0.755812	-0.243654	-0.362555	-0.208756	-0.101591	0.101591	0.143846	0.165477	1.11837	0.397538
Bm1_02040	Hypothetical glycine receptor like protein T20B12.9 in chromosome III		0	0	0	0	0.222795	0.452472	0.199128	0	0.452472	0.753086
Bm1_02045	cysteine-rich protein 1	P10	-0.514021	-1.14055	-0.665621	-0.0463812	0.0463812	1.06307	1.84671	2.31462	3.45517	1.66675e-38
Bm1_02050	hypothetical protein		-0.220709	-0.220709	-0.220709	-0.220709	0.220709	0.343446	0.948522	0.956554	1.17726	0.0619265
Bm1_02055	AF17 C	P11	-0.995288	-0.995288	-0.995288	-0.292785	0.292785	0.481533	1.81475	1.53136	2.81004	2.05158e-07
Bm1_02060	Tropomyosin family protein	P6	-3.76704	-1.78015	-1.8534	-0.0965973	0.0965973	1.20669	2.67565	2.77287	6.53991	3.30825e-134
Bm1_02065	Abnormal cell migration protein 10		-0.520763	-0.285455	-0.778953	0.00922169	-0.00922169	0.454678	0.286467	0.617831	1.39678	0.12115
Bm1_02075	Papain family cysteine protease containing protein		-0.136984	-0.136984	-0.136984	0.136984	0.905329	0.536187	0.273311	-0.136984	1.04231	0.277091
Bm1_02080	hypothetical protein		-0.287989	-0.287989	0.205273	-0.287989	-0.0234156	0.0234156	0.141853	0.115284	0.493261	0.906921
Bm1_02085	hypothetical protein	P3	-2.51274	-0.846253	2.48058	-0.261788	0.0818948	1.81223	0.171778	-0.0818948	4.99332	6.17759e-14
Bm1_02090	hypothetical protein		0.610193	0.544127	0.0450521	0.394327	-0.0450521	-0.0807253	-0.0872403	-0.160906	0.771098	0.102074
Bm1_02095	hypothetical protein	P8	-2.52006	-2.52006	-2.03658	-0.47256	0.688342	1.59825	1.50866	0.47256	4.11831	1.78048e-19
Bm1_02100	Cathepsin L-like precursor	P11	0	0	0	0	0	1.9598	5.81208	7.34796	7.34796	5.54765e-174
Bm1_02115	hypothetical protein	P9	-2.00418	-2.00418	-1.52459	1.37408	-1.37408	2.52507	4.80514	2.85146	6.80933	2.89932e-65
Bm1_02120	Thrombospondin type 1 domain containing protein	P5	-0.678429	1.23398	0.955021	0.466472	-0.0969107	0.0969107	-0.467544	-0.861996	2.09598	6.07439e-05
Bm1_02130	piwi domain containing protein		-0.136683	-0.136683	-0.136683	0.136683	0.47407	0.336987	0.261365	-0.136683	0.610753	0.774509
Bm1_02135	ribosomal protein L9 domain containing protein		-0.530317	0.295414	0.0462108	0.244099	0.118835	-0.147961	-0.0462108	-0.638798	0.934212	0.751752
Bm1_02140	Lethal protein 805, isoform d		0	0	0	0	0	0	0.54731	0.982601	0.982601	0.121262
Bm1_02145	hypothetical protein		-1.4476	-1.4476	-0.318382	-0.148008	0.164518	0.148008	0.424107	0.368767	1.87171	0.549193
Bm1_02150	MGC82072 protein		1.77634	0.337035	0.23932	-0.0812015	0.0812015	-0.490784	-0.350888	-0.719515	2.49585	0.17806
Bm1_02155	Delta5 fatty acid desaturase	P5	-2.44112	1.37206	0.493829	0.879243	0.964061	-0.493829	-0.708407	-1.26148	3.81317	3.3955e-07
Bm1_02160	signal peptide peptidase family protein	P1	-2.83165	-1.16519	-0.208369	-0.347082	0.208369	1.04615	1.73829	1.70256	4.56994	9.05906e-17
Bm1_02165	Endonuclease/Exonuclease/phosphatase family protein		-0.715565	0.062249	-0.231186	0.241863	0.152915	-0.062249	0.0696495	-0.257379	0.957429	0.236785
Bm1_02170	hypothetical protein	P6	-4.511	-0.591843	-1.23107	0.336729	-0.336729	0.547376	2.36677	2.84172	7.35271	1.2796e-97
Bm1_02175	Integrin alpha cytoplasmic region family protein	P5	-4.31727	0.256231	0.478225	-0.024518	0.0823107	0.024518	-0.710564	-1.01929	4.7955	9.86648e-06
Bm1_02190	hypothetical protein		-0.709571	-0.709571	0.655995	0.167269	0.0550752	-0.709571	-0.00308161	0.00308161	1.36557	0.118513
Bm1_02195	hypothetical protein		-1.26078	0.409972	-0.103658	0.155393	-0.374688	-0.236437	0.346728	0.103658	1.67075	0.908963
Bm1_02205	hypothetical protein	P8	-2.57306	-2.57306	-2.57306	0.776994	0.519591	-0.519591	0.72531	1.35242	3.92548	6.04753e-13
Bm1_02210	Glycosylation related protein 12, isoform		0.0109412	-0.0222125	-0.239949	-0.0109412	0.0638336	-0.266308	0.0855606	0.429839	0.696147	0.916914
Bm1_02215	Protein kinase domain containing protein	P12	-0.0836231	-0.0836231	-0.0836231	0.190296	-0.0836231	0.0836231	0.3112	1.86186	1.94548	0.000601795
Bm1_02220	Ubiquitin carboxyl-terminal hydrolase family protein	P5	-1.27562	0.25012	0.203237	0.362848	0.302059	-0.203237	-0.315809	-0.454868	1.63847	0.000279557
Bm1_02225	hypothetical protein	P5	-0.606132	1.42163	0.615816	0.755283	0.285116	-0.285116	-0.774437	-1.06359	2.48522	6.99899e-19
Bm1_02230	Voltage-gated calcium channel, P/Q-type, alpha subunit. C. elegans unc-2 ortholog	P7	-1.38804	-1.38804	-0.544579	-0.087809	0.087809	0.877183	1.95496	2.04406	3.4321	1.35701e-11
Bm1_02240	Globin family protein	P10	-0.91091	0.150231	-0.426553	-0.208503	-0.150231	1.25542	3.41748	2.9589	4.32839	2.13763e-31
Bm1_02245	hypothetical protein	P2	-2.06103	-0.591292	-0.0213203	-0.624968	0.0729315	0.912152	0.355045	0.0213203	2.97319	5.49941e-09
Bm1_02255	Zinc finger, C2H2 type family protein		-0.0865107	-0.0865107	0.404173	-0.0865107	0.360602	0.0865107	0.139286	-0.0865107	0.490684	0.804376
Bm1_02260	LD06138p		-0.00623774	0.460819	0.00623774	-0.0450802	0.101289	-0.143627	-0.30327	0.0436831	0.764089	0.609338
Bm1_02265	MGC69076 protein		0.238579	-1.15179	-0.449732	-0.241534	0.396532	-0.129825	0.283954	0.129825	1.54833	0.595586
Bm1_02270	OTU-like cysteine protease family protein		-3.25423	-0.148669	-0.037417	0.181294	0.037417	0.377254	0.223033	-0.162481	3.63148	0.597187
Bm1_02275	RNA polymerase II transcriptional coactivator	P16	0.251496	0.642245	0.188007	0.139544	-0.139544	-0.414394	-1.20564	-1.21157	1.85381	7.12288e-08
Bm1_02300	hypothetical protein		0	0	0	0.503106	0.221107	0.173516	0	0	0.503106	0.735957
Bm1_02305	Kunitz/Bovine pancreatic trypsin inhibitor domain containing protein	P10	-2.44293	-2.44293	-1.96195	-0.720837	0.720837	1.66339	2.7694	3.10256	5.54549	6.27188e-49
Bm1_02315	hypothetical protein		0.648919	-0.139585	-0.687972	-0.506788	0.107002	0.367104	0.52764	-0.107002	1.33689	0.544329
Bm1_02320	Protein kinase domain containing protein		-0.532296	-0.146438	-0.065012	0.065012	0.161603	0.305532	0.349955	-0.541987	0.891941	0.332003
Bm1_02325	Immunoglobulin I-set domain containing protein	P9	-1.70573	-1.70573	-1.221	0.341746	-0.341746	0.406705	1.11663	0.808624	2.82236	0.000260186
Bm1_02330	von Willebrand factor type C domain containing protein	P13	0.895919	-2.95495	-2.46841	-0.179789	-0.383979	0.179789	0.770083	0.837995	3.85087	2.84219e-07
Bm1_02340	hypothetical protein	P10	-0.591114	-0.591114	-0.11091	0.11091	-0.359728	0.82525	2.19358	2.88911	3.48022	1.44127e-14
Bm1_02345	hypothetical protein	P9	-2.27584	0.142802	-1.4324	2.52886	-0.21025	-0.142802	3.02676	2.74969	5.30259	6.48952e-52
Bm1_02350	tRNA-Leu		-0.308333	-0.308333	-0.308333	0.722976	0.13723	-0.13723	1.04843	0.66524	1.35676	0.0718073
Bm1_02360	hypothetical protein	P16	-0.54633	0.28108	-0.28108	-0.358097	1.23816	1.14553	0.718278	-0.394631	1.78449	4.58007e-08
Bm1_02365	hypothetical protein		0.870147	0.74749	0.279191	0.0979542	-0.165632	-0.253242	-0.0979542	-0.84302	1.71317	0.0761751
Bm1_02370	dihydrouridine synthase domain containing protein		-0.890627	-0.0907555	0.448798	0.247912	0.149934	0.042464	-0.042464	-0.467139	1.33943	0.316291
Bm1_02375	hypothetical protein		0.630609	0.864493	-0.24637	-0.404304	-0.261718	-0.454352	0.670058	0.24637	1.31885	0.174925
Bm1_02380	SPRY domain containing protein		-1.01619	-0.55372	0.175356	-0.180411	0.00998556	-0.00998556	0.195708	0.136445	1.2119	0.926699
Bm1_02385	DnaJ domain containing protein		0.199078	0.435621	-0.0560657	0.0560657	-0.360566	-0.533718	0.303679	-0.323655	0.969339	0.775629
Bm1_02390	hypothetical protein	P10	-1.278	-0.217566	-0.44328	-1.278	0.217566	1.49135	4.20996	2.27893	5.48796	6.23223e-32
Bm1_02395	hypothetical protein	P10	-1.50637	-1.50637	-1.02597	0.020159	-0.020159	1.39636	2.74487	2.72106	4.25124	7.00835e-24
Bm1_02400	hypothetical protein	P11	0	0	0	0	0	0.173	2.53078	3.6829	3.6829	1.05572e-16
Bm1_02405	fidgetin protein		-0.298473	2.13438	-0.298473	0.57591	0.917452	-0.14996	-0.110352	0.110352	2.43285	0.115042
Bm1_02410	hypothetical protein		0	0	0	0	0.220498	0	0.425943	0	0.425943	0.66628
Bm1_02415	G-patch domain containing protein		-1.92252	0.49536	0.1574	0.264035	-0.00587897	-0.280374	0.00587897	-0.383583	2.41788	0.819907
Bm1_02420	ATPase, AAA family protein		0.777505	-0.0737384	-0.0745966	0.359823	0.618689	0.0737384	-0.360898	-0.102209	1.1384	0.0505325
Bm1_02430	SAP1 protein		-1.50384	-0.445008	0.0846537	0.547166	-0.0846537	-0.528837	0.688642	0.970181	2.47402	0.421973
Bm1_02435	G-patch domain containing protein		0.53314	0.502911	-0.187748	-0.26879	0.123744	-0.00196809	-0.229977	0.00196809	0.80193	0.6983
Bm1_02440	hypothetical protein		1.15076	-0.498063	-0.239496	0.207933	-0.287262	0.150128	-0.0998872	0.0998872	1.64882	0.84806
Bm1_02445	Pin1-type peptidyl-prolyl cis-trans isomerase, BmPin1	P15	1.74137	0.245963	-0.130852	-0.0378338	0.0378338	0.131592	-0.634604	-1.03263	2.77401	0.000282757
Bm1_02450	kinesin like protein KLP-4	P13	0.117255	-0.626794	-0.708783	-0.163457	-0.117255	0.340456	0.74057	0.515923	1.44935	0.000599112
Bm1_02455	WW domain containing protein	P1	-3.59917	-0.912193	-0.794159	-0.91342	0.794159	1.02775	1.52206	1.25019	5.12123	2.60262e-19
Bm1_02460	Not1 N-terminal domain, CCR4-Not complex component family protein		-0.720407	0.409791	0.0443909	0.0494535	-0.15053	-0.0144209	0.0144209	-0.187038	1.1302	0.498731
Bm1_02470	BED zinc finger family protein		-1.00092	-1.00092	-1.00092	0.0326441	0.068511	0.710564	0.509099	-0.0326441	1.71148	0.200761
Bm1_02480	tRNA-dihydrouridine synthase 4		-2.55212	0.72628	0.408385	0.0369365	-0.0678815	0.0874678	-0.156279	-0.0369365	3.2784	0.664013
Bm1_02485	Potential global transcription activator SNF2L		-0.0967209	0.42691	0.229129	0.192757	0.0802998	-0.0802998	-0.419538	-0.5018	0.92871	0.000214592
Bm1_02490	linker histone H1 and H5 family protein		-0.552679	-0.552679	0.270535	0.14817	0.515594	-0.552679	0.517275	-0.14817	1.06995	0.205901
Bm1_02495	histone H3		-1.11743	-0.0568891	-0.265107	0.0549453	0.838163	-0.0549453	1.23208	0.574607	2.34951	0.0991659
Bm1_02500	hypothetical protein		0.825143	0.0362569	-0.0362569	-0.928352	0.128377	-0.316301	-0.922332	0.305954	1.7535	0.29382
Bm1_02505	histone H2A		0.00808442	0.836239	-0.126034	-0.191977	-0.0943086	0.109047	-0.00808442	0.367167	1.02822	0.791179
Bm1_02510	histone H2B 2		-2.18228	0.246552	0.91761	0.0670709	0.259321	-0.0670709	-0.88335	-0.841482	3.09989	0.400021
Bm1_02515	histone H4	P5	-1.40949	0.649895	0.733947	0.196573	0.488925	-0.196573	-0.585433	-0.253675	2.14344	5.33325e-13
Bm1_02520	1300013D05Rik protein		-3.57484	0.235967	0.251903	-0.08478	0.0415241	-0.0415241	-0.429591	0.156493	3.82674	0.360181
Bm1_02525	hypothetical protein	P5	-0.781914	0.926923	0.530006	1.13363	0.438148	-0.438148	-0.930064	-1.83679	2.97042	4.65716e-16
Bm1_02530	hypothetical protein		-3.20906	0.0685681	-1.14848	0.198833	-0.30444	-0.0446361	0.373713	0.0446361	3.58277	0.0326567
Bm1_02535	transcriptional activator RF2a		0	0	0	0	0.569723	0.653624	0	0	0.653624	0.212613
Bm1_02540	hypothetical protein		-1.07501	-0.0152713	0.0780634	-0.800889	-0.0364069	0.0152713	0.0901014	0.0968202	1.17183	0.799302
Bm1_02545	hypothetical protein		-0.797165	-0.0516911	-0.307214	0.0516911	-0.198893	0.0608305	0.0846676	0.410005	1.20717	0.111685
Bm1_02555	hypothetical protein		-2.44799	-0.0295372	0.178244	0.237171	0.0295372	-0.547666	0.162627	-0.18616	2.68516	0.489394
Bm1_02560	Sodium/calcium exchanger protein	P14	1.50929	0.0775473	-0.424179	-1.30959	-0.0478635	-1.1315	0.0478635	0.328929	2.81888	0.000967312
Bm1_02565	40S ribosomal protein S12		0	0	0	0	0	0.174358	0.228115	0	0.228115	0.908963
Bm1_02570	hypothetical protein	P16	0.296189	0.507157	0.608713	-0.107596	0.107596	-0.406563	-0.726985	-1.05615	1.66486	8.82112e-07
Bm1_02575	hypothetical protein	P6	-3.59204	-1.92506	-2.01489	-0.465607	0.465607	0.990442	1.49839	1.1351	5.09043	2.01992e-23
Bm1_02590	106 kDa O-GlcNAc transferase-interacting protein		-2.25166	-2.25166	-0.678907	0.285597	0.0974672	-0.0974672	0.591925	0.690212	2.94187	0.0167989
Bm1_02595	CDP-alcohol phosphatidyltransferase family protein		0.313567	0.128844	0.0816688	0.0274369	-0.0274369	-0.454679	-0.759601	-0.884531	1.1981	0.0539879
Bm1_02600	hypothetical protein		0.484545	-0.277521	-0.0789858	-0.092743	0.0789858	0.232272	0.188892	-0.347279	0.831823	0.435335
Bm1_02605	hypothetical protein		-0.558515	-0.558515	0.560681	0.473686	0.249817	0.0073986	-0.0073986	-0.165312	1.1192	0.808576
Bm1_02610	hypothetical protein	P2	-2.15855	-0.492086	0.558544	-1.65461	-0.0868588	0.317104	0.0868588	1.43482	3.59338	1.58105e-07
Bm1_02615	Paramyosin, identical	P10	-2.7803	-2.7803	-1.41334	-0.731542	0.731542	2.12346	3.72354	3.47797	6.50384	4.65784e-51
Bm1_02625	Zinc finger in N-recognin family protein		0.45635	0.415507	0.690949	-0.325563	-0.555719	-0.19549	-0.287528	0.19549	1.24667	0.366158
Bm1_02630	hypothetical protein		-0.244597	0.343855	0.051752	0.215019	-0.00592015	-0.182389	-0.103186	0.00592015	0.588453	0.855125
Bm1_02635	LOC398445 protein	P15	0.603168	0.414843	0.154071	0.31987	-0.154071	-0.250208	-0.821457	-1.20286	1.80603	2.60595e-07
Bm1_02640	Tubulin beta chain		-2.19896	-2.19896	0.00701719	0.336874	-0.00701719	0.265356	0.368511	-0.266381	2.56747	0.255313
Bm1_02645	hypothetical protein		-1.10478	0.562309	0.472211	0.61704	0.271223	-0.430637	-0.271223	-0.397771	1.72182	0.231173
Bm1_02650	hypothetical protein	P13	0.235359	-1.26453	-1.22817	-0.606914	-0.123369	0.123369	0.703216	1.24046	2.50499	9.15396e-21
Bm1_02655	RIKEN cDNA 1110057H19		-0.155162	0.666765	0.657384	-0.234198	0.839533	0.155162	-0.44006	-0.561296	1.40083	0.0533844
Bm1_02660	erythroblast macrophage protein EMP		0.0334196	-0.90289	0.00431456	-0.269586	0.100626	-0.00431456	-0.0530371	0.281186	1.18408	0.643997
Bm1_02675	GYF domain containing protein		-3.13661	-0.449998	-0.344909	-0.193902	0.294934	0.193902	0.573667	0.30633	3.71028	0.174245
Bm1_02680	Paf1 family protein		0.212063	0.478752	0.0491072	0.236011	-0.0491072	-0.136106	-0.902171	-0.967612	1.44636	0.0332744
Bm1_02685	Hypothetical 45.4 kDa protein in thiaminase I 5'region, putative		-1.34519	-0.517771	0.13499	-0.0798234	0.138454	0.03233	-0.03233	0.122891	1.48365	0.859076
Bm1_02690	RNA binding motif protein		-1.29666	-0.23594	0.607917	0.230206	-0.108472	-0.0695336	0.44428	0.0695336	1.90458	0.827746
Bm1_02695	Zinc carboxypeptidase family protein	P3	-2.30655	-2.30655	-0.113742	0.887258	1.01359	1.57971	0.113742	-1.12916	3.88625	7.9102e-11
Bm1_02700	hypothetical protein		-1.56897	-1.56897	-1.09031	0.0585037	0.0694177	-0.00512999	0.00512999	0.260036	1.82901	0.388765
Bm1_02710	kinesin-like protein KIF3A		-0.58359	-0.618778	0.188406	-0.0305278	-0.263471	0.360908	0.407778	0.0305278	1.02656	0.166384
Bm1_02715	hypothetical protein		-0.248865	-0.248865	0.607194	0.0246237	-0.0246237	0.061799	0.147819	-0.248865	0.856059	0.828509
Bm1_02720	hypothetical protein		-0.719211	0.943195	0.563159	-0.0101366	0.265544	0.0101366	-0.350606	-0.233923	1.66241	0.137532
Bm1_02725	T-box protein 2		-1.12449	-0.0621712	-0.645162	0.293575	0.0621712	0.344759	0.46309	-0.168157	1.58758	0.716399
Bm1_02730	chaperone-activity of bc1 complex-like, mitochondrial		-1.47493	0.347947	0.0127809	0.317914	-0.0127809	0.138927	-0.15805	-0.273517	1.82288	0.108703
Bm1_02735	Variant SH3 domain containing protein		0.0102309	-0.373448	0.104294	-0.215465	-0.014071	0.198482	-0.0102309	0.0180431	0.57193	0.586509
Bm1_02740	hypothetical protein		-1.30325	0.36189	-0.257984	0.0700511	0.0552066	0.100575	-0.0552066	-0.283527	1.66514	0.855662
Bm1_02745	hypothetical protein	P3	-0.274768	-0.552485	0.289351	0.559641	0.274768	0.434493	-0.29662	-1.07154	1.63118	5.77968e-06
Bm1_02750	Lectin C-type domain containing protein	P2	-1.74788	-1.74788	1.41472	-0.329739	1.94116	2.02043	0.329739	-0.376116	3.76831	4.04219e-14
Bm1_02755	Predicted DNA repair exonuclease		-1.72289	0.697363	0.0273357	0.528163	0.290234	-0.0273357	-0.132558	-0.356214	2.42025	0.637572
Bm1_02760	Neurotransmitter-gated ion-channel ligand binding domain containing protein	P6	-4.05691	-0.247663	-2.69028	-0.621491	0.247663	2.19174	3.95566	3.95844	8.01535	4.80218e-142
Bm1_02765	Galactosyltransferase family protein	P12	-0.367271	-0.367271	-0.367271	0.136526	-0.136526	0.421497	1.22225	1.89194	2.25921	0.000170095
Bm1_02770	Galactosyltransferase family protein		-3.79242	-0.881943	0.0793875	0.153607	-0.0119508	0.0119508	-0.237002	0.458508	4.25093	0.138172
Bm1_02775	1,4-alpha-glucan branching enzyme	P1	-3.25311	-1.19549	-0.909204	-0.124193	0.124193	0.989066	1.18995	0.798818	4.44306	6.59035e-32
Bm1_02780	hypothetical protein	P10	-2.22676	-2.22676	-1.74345	-0.926682	0.926682	2.51881	3.35121	3.31423	5.57797	2.38382e-73
Bm1_02785	WLPL439	P13	0.514142	-0.872215	-0.795649	-0.634083	-0.206344	0.206344	0.572902	1.17351	2.04573	0.00319351
Bm1_02790	wnt family protein		-2.79459	-0.702861	0.162519	0.695498	0.00973989	0.124162	-0.00973989	-0.125878	3.49009	0.221616
Bm1_02795	hypothetical protein		0	0	0	0	0	0.331411	1.02307	0.957852	1.02307	0.0682826
Bm1_02800	Histone H2B 2		-0.512247	0.551575	-0.512247	-0.00918579	-0.250388	0.176437	0.00918579	0.870188	1.38244	0.451928
Bm1_02805	hypothetical protein		-0.914453	0.282911	0.239122	-0.0106239	-0.162624	0.113479	0.0106239	-0.302133	1.19736	0.746845
Bm1_02810	glycosyl transferase, group 2 family protein		-2.27209	-0.08323	0.256216	-0.152582	0.584783	0.46324	0.08323	-0.115033	2.85687	0.0245618
Bm1_02815	Amino acid permease family protein	P6	-0.248496	1.31891	0.68479	0.0286928	-0.147437	-1.13811	-0.0286928	0.504531	2.45702	0.00384154
Bm1_02820	EGF-like domain containing protein		-1.26062	0.410549	0.693414	0.631324	0.301522	-0.301522	-0.521866	-0.870469	1.95403	0.278659
Bm1_02825	Hypothetical 42.9 kDa protein R74.6 in chromosome III		-0.227709	0.832388	-0.227709	0.474169	0.0273247	0.431397	-0.0273247	-0.227709	1.0601	0.476405
Bm1_02835	hypothetical protein		-0.467464	-0.467464	-0.467464	0.234366	0.0145181	-0.0145181	0.0575118	0.50004	0.967504	0.775414
Bm1_02840	hypothetical protein		0	0	0	0	0.259966	0.533879	1.16483	0	1.16483	0.0810994
Bm1_02865	hypothetical protein	P11	-1.58876	-0.527644	-0.454798	-0.288378	0.288378	1.41133	4.44724	4.80135	6.39012	9.14732e-90
Bm1_02870	T-cell receptor beta chain ANA 11		0	0	0	0.274164	0.220498	0	0.197417	0	0.274164	0.860889
Bm1_02875	protein F52E1.8		0	0	0	0.503079	0	0.153879	0	0	0.503079	0.639902
Bm1_02900	hypothetical protein		-0.767545	-0.767545	1.15684	-0.0651793	0.831974	0.80113	0.0651793	-0.767545	1.92438	0.0236399
Bm1_02905	hypothetical protein	P6	-1.06674	-0.00588814	-0.581054	-0.364462	0.00588814	0.91047	1.22699	1.08876	2.29373	0.00501473
Bm1_02910	hypothetical protein		0	0	0.844642	0	0	0.175006	0	0.719529	0.844642	0.246124
Bm1_02915	hypothetical protein		0	0	0	0	0	0	0.397941	0	0.397941	0.640902
Bm1_02930	Cuticle collagen 14		0	0	0	0	0	0.652607	0.432207	0	0.652607	0.311523
Bm1_02935	nuclear cap binding protein subunit 2		-0.0604227	0.511239	0.348317	-0.441289	0.0786707	0.0604227	-0.3134	-0.383501	0.952528	0.0704656
Bm1_02940	Glycine-rich cell wall structural protein 1 precursor	P9	-3.52226	-5.97574	-2.02221	1.73007	-1.54865	1.54865	4.78622	3.12296	10.762	2.58903e-107
Bm1_02945	heparan 6-O sulfotransferase HST-6		-0.876157	0.183726	-0.386284	-0.173732	0.423349	0.215771	0.173732	-0.177492	1.29951	0.901355
Bm1_02950	CGI-146 protein		-0.903582	0.342323	-0.148642	-0.0974876	0.127487	-0.180939	0.0974876	0.13651	1.2459	0.956886
Bm1_02955	hypothetical protein		-1.25705	-1.25705	-0.782191	0.268176	-0.158881	0.283708	0.158881	0.270771	1.54076	0.583617
Bm1_02960	hypothetical protein	P6	-3.22961	0.0480128	-0.434828	-0.326734	-0.0480128	0.085328	1.18607	0.919613	4.41568	3.0828e-08
Bm1_02970	S-antigen protein precursor		0	0	0	0.274185	0	0	0	0.390633	0.390633	0.706413
Bm1_02980	hypothetical protein		-0.794224	0.269208	0.0360025	-0.0930041	-0.0360025	0.0526616	-0.244762	0.377574	1.1718	0.975426
Bm1_02985	reticulocyte binding-like protein 2b		-1.08328	-1.08328	-0.595276	0.333377	-0.186529	0.186529	0.204112	0.282344	1.41665	0.661695
Bm1_02990	protein unc-52	P6	-3.49814	-1.83119	-1.58466	-0.479237	0.479237	1.84237	3.35245	2.58297	6.85058	6.60616e-88
Bm1_02995	Immunoglobulin I-set domain containing protein	P7	-2.53385	-2.53385	-0.338511	-0.639559	0.338511	1.46447	2.92414	2.34253	5.45799	9.62238e-42
Bm1_03000	TPR Domain containing protein		-0.633191	-0.633191	-0.148215	0.399141	1.00848	0.148215	0.535341	-0.633191	1.64167	0.0736626
Bm1_03005	Ser/Thr protein phosphatase family protein	P6	-2.22394	-1.16261	-1.38249	-0.697647	0.697647	1.24454	2.6452	2.71374	4.93768	1.95856e-40
Bm1_03010	PRO0477p		-0.307483	-0.0716549	0.118925	0.14398	0.269616	0.0157387	-0.144607	-0.0157387	0.577099	0.977028
Bm1_03015	hypothetical protein	P11	-0.820048	-0.820048	0.018832	0.480141	-0.820048	-0.018832	4.07783	2.88377	4.89788	1.26501e-47
Bm1_03045	Nematode cuticle collagen N-terminal domain containing protein	P11	-1.43761	-0.3778	-0.961914	0.748888	0.3778	-0.968889	3.56705	6.30844	7.74605	3.25116e-54
Bm1_03050	hypothetical protein		-0.185813	-0.185813	0.677065	0.318791	0.0327931	-0.0327931	-0.185813	0.521731	0.862878	0.51454
Bm1_03060	G protein-coupled receptor F59B2.13		-0.868483	-0.868483	0.258174	-0.868483	-0.0483716	0.0483716	0.710476	0.82739	1.69587	0.054005
Bm1_03075	Methyltransferase-like protein		-1.10004	0.144385	0.45745	-0.0605273	0.36595	-0.484025	0.0605273	-0.298963	1.55749	0.130921
Bm1_03080	hypothetical protein		-0.0398167	0.621042	-0.239778	0.172848	0.0880502	0.0235107	-0.0235107	-0.367073	0.988115	0.603441
Bm1_03085	glutamyl-tRNA synthetase		-0.193059	0.632724	-0.0148365	0.130588	0.0219263	-0.0473408	0.0148365	-0.587165	1.21989	0.822893
Bm1_03090	RNA binding motif protein	P16	0.321658	0.495324	0.649381	0.117961	-0.117961	-0.633043	-1.1739	-0.92682	1.82328	7.78795e-06
Bm1_03100	Major intrinsic protein		-0.534793	1.12735	-0.0421657	-0.534793	0.577837	-0.0609886	0.0421657	0.172728	1.66214	0.319204
Bm1_03105	Hypothetical 11.0 kDa protein in FAA3-MAS3 intergenic region, putative		0.647347	0.287184	0.615433	0.50842	-0.349747	-0.446178	-0.287184	-1.40986	2.0572	0.0288885
Bm1_03110	Major intrinsic protein	P13	1.12333	-1.32507	0.863697	-0.623047	0.917574	-0.355267	-0.382371	0.355267	2.44841	0.00320994
Bm1_03115	DNA repair protein Rad4 containing protein	P14	1.22713	0.96155	0.135083	0.222609	-0.135083	-0.511696	-1.07563	-0.582876	2.30276	0.000339412
Bm1_03120	serine/threonine kinase 12	P15	0.769316	-0.00239826	0.446169	0.00239826	0.117069	-0.579491	-0.646226	-1.41706	2.18638	0.000581912
Bm1_03125	Animal haem peroxidase family protein	P9	-1.84484	-0.784102	-1.84484	1.84528	-0.673091	2.24598	1.50267	0.673091	4.09082	1.34959e-14
Bm1_03135	Major intrinsic protein		-0.79539	-0.79539	-0.307105	0.081086	0.522456	0.143201	0.867867	-0.081086	1.66326	0.402887
Bm1_03140	Major intrinsic protein	P13	-0.28037	-1.01081	-0.0366136	0.0366136	-0.157203	0.747227	1.10452	1.76406	2.77486	6.31353e-25
Bm1_03145	Cuticle collagen 7 precursor	P11	-0.566945	-0.566945	-0.566945	1.06009	0.412191	-0.412191	5.17601	8.02631	8.59325	3.51488e-76
Bm1_03160	hypothetical protein		0.675068	-0.217567	0.237182	0.0946839	-0.0848746	0.039055	-0.275238	-0.039055	0.950306	0.961378
Bm1_03165	hypothetical protein		-0.125233	0.485044	0.303841	-0.208591	0.260596	0.125233	-0.308513	-0.469239	0.954283	0.00187353
Bm1_03170	hypothetical protein		0	0	0	0	0	0	0.548866	0	0.548866	0.373712
Bm1_03175	hypothetical protein		2.3177	-0.136774	-0.136774	0.136774	-0.136774	0.547526	0.431741	-0.136774	2.45447	0.137022
Bm1_03180	hypothetical protein		0	0	0	0	0	0	0.19682	0.402667	0.402667	0.760031
Bm1_03185	gag protein	P13	3.49025	-0.323531	0.145001	-0.323531	-0.323531	-0.145001	0.184405	0.401211	3.81378	0.00619508
Bm1_03195	adenylyl cyclase		-0.731408	1.36329	-0.731408	0.685641	-0.118161	0.143881	0.118161	-0.731408	2.0947	0.0583203
Bm1_03200	Cell wall integrity and stress response component 2 precursor, putative		-0.659711	0.40134	0.920971	0.216762	-0.0443757	-0.0952195	-0.453749	0.0443757	1.58068	0.394753
Bm1_03205	hypothetical protein		0	1.06374	0	0.274164	0.220498	0	0	0	1.06374	0.503375
Bm1_03210	hypothetical protein	P1	-2.72229	-0.630357	-0.0145871	-1.19553	0.117571	0.0145871	2.26027	2.19374	4.98256	2.03495e-24
Bm1_03235	29kDa protein from Anisakis simplex	P7	-2.02782	-4.47867	-0.79373	-0.155744	0.155744	1.14351	2.36667	2.52258	7.00124	5.67734e-83
Bm1_03240	hypothetical protein		0	0	0	0	0	0.153507	0	0.390633	0.390633	0.807316
Bm1_03245	Protein kinase domain containing protein		-3.18695	0.245425	0.504048	0.303999	-0.110099	0.110099	-0.188078	-0.382963	3.691	0.333172
Bm1_03250	N(4)-(Beta-N-acetylglucosaminyl)-L-asparaginase		-1.80051	0.291678	-0.427572	0.930267	-0.015667	0.193804	-0.145399	0.015667	2.73078	0.303407
Bm1_03255	hypothetical protein		-0.369486	-0.369486	-0.369486	0.663721	0.823619	0.176966	-0.176966	0.338251	1.19311	0.442853
Bm1_03260	coronin 2A		-0.755441	-0.755441	0.380841	-0.481467	0.416734	-0.179685	0.179685	0.209832	1.17217	0.56126
Bm1_03265	N-terminal acetyltransferase complex ARD1 subunit homolog, putative		-1.60565	0.813606	-0.021827	0.021827	0.635941	0.288427	-0.263185	-0.639652	2.41925	0.424739
Bm1_03270	hypothetical protein		-0.344636	0.7157	-0.344636	-0.0706095	0.441498	0.519362	0.0706095	-0.344636	1.06034	0.373712
Bm1_03275	kinesin-II 85 kDa subunit		-0.722899	0.336197	-0.249555	0.449481	-0.459014	0.103335	0.015362	-0.015362	1.17238	0.826342
Bm1_03280	Clc-type chloride channel protein	P8	-1.73471	-1.73471	-1.73471	0.579059	0.464573	-0.0701118	0.0701118	0.524885	2.31377	0.00378922
Bm1_03285	hypothetical protein		0.274581	-0.0214247	-0.348678	0.0214247	0.117467	0.0397337	-0.204857	-0.198269	0.623259	0.730229
Bm1_03290	homeobox protein		-0.992797	-0.992797	0.127564	0.72925	-0.379098	-0.127564	0.146466	0.187031	1.72205	0.430938
Bm1_03295	Brix domain containing protein 1 homolog	P16	0.310806	0.724428	0.451924	0.0220364	-0.0220364	-0.0593253	-0.356819	-0.389742	1.11417	0.00235694
Bm1_03300	hypothetical protein		-3.41721	0.0131405	-0.0131405	-0.15925	-0.40818	0.0274704	0.282876	0.218929	3.70009	0.510433
Bm1_03305	hypothetical protein		0	0	0	0	0	0.418416	0.197868	0	0.418416	0.631416
Bm1_03310	Ferm domain (protein4.1-ezrin-radixin-moesin) family protein 4-like	P12	-0.379555	-0.346153	-0.28454	-0.194028	0.194028	0.21497	0.971473	1.63552	2.01508	4.65367e-19
Bm1_03315	hypothetical protein		-0.565907	-0.565907	0.277915	-0.292317	0.0674501	-0.000471347	0.000471347	0.136171	0.843822	0.943987
Bm1_03320	Protein kinase domain containing protein		-0.985743	-0.719083	-0.0597805	0.0356498	-0.0356498	0.313991	0.320211	0.150396	1.30595	0.10605
Bm1_03325	hypothetical protein	P5	-1.81244	-0.144309	-0.223575	1.16842	1.40471	0.144309	-0.351572	0.61476	3.21715	0.00181832
Bm1_03330	hypothetical protein		0	0	0	1.41492	0	0.459038	0	0	1.41492	0.036876
Bm1_03335	protein kinase C3,putative		0.893119	0.682086	0.144987	-0.475243	-0.0123067	0.0123067	-0.440784	-0.885281	1.7784	0.125358
Bm1_03345	hypothetical protein		-2.60456	0.0812864	-0.0812864	-0.556512	0.400467	0.609335	0.41266	-0.546975	3.2139	0.0236558
Bm1_03350	hypothetical protein	P4	-2.45796	-0.792423	-0.398316	0.523377	0.107362	1.4402	0.913722	-0.107362	3.89815	1.82419e-05
Bm1_03355	hypothetical protein		-0.585524	-0.585524	0.258196	-0.0820337	0.0290461	-0.0290461	0.235915	0.780837	1.36636	0.720227
Bm1_03360	hypothetical protein		0.394002	-0.412717	-0.144333	-0.0407736	-0.299142	0.11922	0.0407736	0.676919	1.08964	0.179487
Bm1_03365	RanBP1 domain containing protein		-0.710552	0.0130531	0.0735554	0.222401	-0.0132973	-0.0849161	0.145484	-0.0130531	0.932954	0.906921
Bm1_03370	LD15209p		-1.28264	-0.167561	0.192265	0.047611	0.0778104	-0.197205	0.0353688	-0.0353688	1.47491	0.915075
Bm1_03375	gag protein		0	0	0	0.503079	0	0.173881	0	0	0.503079	0.639106
Bm1_03385	'Cold-shock' DNA-binding domain containing protein	P2	-1.4434	-1.4434	-0.599812	-0.741377	0.599812	0.678107	0.953891	1.22407	2.66747	0.000517727
Bm1_03390	hypothetical protein		0	0	0	0	0	0.311147	0.197417	0	0.311147	0.794342
Bm1_03395	dynein heavy chain isotype 1B		-0.842817	0.21925	0.000764367	-0.842817	0.316539	-0.0615515	-0.000764367	0.333852	1.17667	0.325901
Bm1_03400	KIAA1997 protein		-1.45095	-0.389774	-0.0817593	0.443116	0.418274	0.141442	-0.281698	0.0817593	1.89406	0.732667
Bm1_03405	hypothetical protein	P12	-1.58477	-0.522489	-1.10528	0.225979	-0.225979	0.720025	0.766555	2.01115	3.59592	3.12716e-06
Bm1_03410	ephrin receptor 1 precursor	P1	-4.09503	-1.67551	-0.160933	0.550811	0.622126	0.546995	0.160933	-0.394687	4.71715	4.63208e-07
Bm1_03415	protein-tyrosine phosphatase Lar-like precursor		-1.3219	-1.3219	-0.187449	0.57181	0.477513	0.428756	0.187449	-0.357777	1.89371	0.361962
Bm1_03420	Integrin alpha pat-2 precursor	P10	-0.489559	-0.519317	-0.226385	-0.35022	0.226385	0.969907	1.94602	1.44347	2.46534	1.28014e-17
Bm1_03425	hypothetical protein		0.270516	0.234422	-0.616992	-1.32207	-0.448775	-0.145839	0.145839	0.302567	1.62464	0.0166623
Bm1_03430	dihydrolipoamide S-acetyltransferase precursor	P6	-0.797126	-0.172694	-0.232291	0.0932489	-0.0782962	0.0782962	0.938175	1.4155	2.21263	3.161e-21
Bm1_03435	hypothetical protein	P6	-0.439742	0.619275	-0.439742	-0.165525	-0.22135	0.165525	1.46961	1.40595	1.90935	0.00550477
Bm1_03440	hypothetical protein	P6	-1.67755	-0.616847	-0.548556	-0.0500807	0.0500807	0.947974	1.49467	1.7818	3.45935	2.59124e-05
Bm1_03445	hypothetical protein		-1.70694	-1.70694	-0.572894	0.265802	0.152436	-0.115362	0.277934	0.115362	1.98488	0.403861
Bm1_03450	hypothetical protein		1.47968	-0.895203	0.424054	0.0935258	0.097126	-0.0935258	-0.604431	-0.388591	2.37488	0.0566697
Bm1_03455	hypothetical protein		0.611089	0.2508	0.352579	-0.0296197	0.0296197	-0.423727	-0.564729	-1.13324	1.74433	0.290371
Bm1_03470	Dopey, N-terminal domain containing protein		0	0	0.491247	0	0.221107	0	0.397558	0	0.491247	0.616545
Bm1_03485	reverse transcriptase		0	0	0	0	0.225146	0	0.550561	0.392696	0.550561	0.471203
Bm1_03490	KH domain containing protein		-0.543751	-0.543751	-0.078644	0.330658	0.391476	0.078644	0.248019	-0.135187	0.935228	0.958037
Bm1_03495	Kunitz/Bovine pancreatic trypsin inhibitor domain containing protein	P10	-1.31365	-0.252504	0.0553379	-0.611423	-0.0553379	1.62372	2.72083	2.1233	4.03447	5.66476e-19
Bm1_03510	hypothetical protein		0	0	0	0	0	0	0.855089	0.697696	0.855089	0.0651786
Bm1_03515	Kunitz/Bovine pancreatic trypsin inhibitor domain containing protein	P3	-3.50611	-3.50611	2.93553	0.0611498	-0.0611498	3.23299	0.625924	-0.161381	6.7391	2.03093e-64
Bm1_03520	Kunitz/Bovine pancreatic trypsin inhibitor domain containing protein	P3	-4.56408	-4.56408	3.08619	-0.0990051	-0.423666	3.622	0.82455	0.0990051	8.18608	3.08666e-117
Bm1_03525	dUTP diphosphatase	P16	-0.305109	0.495264	-0.2289	0.2289	0.547071	0.276946	-0.686016	-1.17794	1.72501	7.14968e-05
Bm1_03530	FHA domain containing protein		0.658608	0.625629	-1.51757	0.664861	-0.0284754	-0.288354	-0.238186	0.0284754	2.18243	0.0410716
Bm1_03540	Argonaute protein		0	0	0.844396	0	0.857485	0	0.944599	0	0.944599	0.0345964
Bm1_03560	UNC-62 splice variant 1a-7		-2.42511	-0.00464773	-0.665943	0.00464773	0.616115	-0.180317	0.543585	0.581237	3.04123	0.137434
Bm1_03565	hypothetical protein	P7	-4.20084	-4.20084	-2.44194	-0.607103	0.607103	1.1643	2.60574	3.31432	7.51516	3.7846e-75
Bm1_03585	hypothetical protein		-0.839083	-0.0166208	0.207503	0.0877147	0.0166208	0.0172164	-0.189891	-0.252366	1.04659	0.389856
Bm1_03590	Regulator of nonsense transcripts 1 homolog	P11	-0.228555	-0.401719	-0.465812	-0.0357199	0.0357199	0.189299	0.777581	0.904576	1.37039	2.97767e-10
Bm1_03595	hypothetical protein	P9	-1.14656	-1.14656	-0.658914	0.826356	-0.383408	1.01697	2.14572	0.383408	3.29228	1.32566e-06
Bm1_03600	hypothetical protein	P9	-1.99103	-0.928281	-0.617753	0.869672	-0.928578	1.34836	2.0393	0.617753	4.03033	5.58292e-08
Bm1_03605	hypothetical protein		-1.63772	0.0287622	0.877121	0.410819	0.10307	-0.0287622	-0.112291	-0.106405	2.51484	0.610437
Bm1_03610	hypothetical protein		-2.63369	-0.543788	0.571024	-0.0966214	-0.0600849	0.0600849	0.217763	0.568364	3.20472	0.421172
Bm1_03615	Hypothetical 56.2 kDa protein in UME3-HDA1 intergenic region, putative		-0.0109802	0.109161	0.361025	-0.420188	0.154574	0.0109802	-0.445655	-0.453018	0.814042	0.428981
Bm1_03620	cuticlin 1 precursor	P4	-1.78017	-0.113688	-0.204405	0.113688	-0.59128	8.23991	8.39342	6.03545	10.1736	3.17744e-167
Bm1_03625	hypothetical protein	P4	0	0	0	0	0	2.63895	2.56649	0.394724	2.63895	1.24085e-15
Bm1_03630	hypothetical protein		0	0	0	0	0	0	0.22728	0.707471	0.707471	0.433928
Bm1_03635	hypothetical protein		-1.92977	0.755664	-0.353989	0.255801	0.421713	-0.0123024	-0.393026	0.0123024	2.68543	0.586252
Bm1_03645	Warthog protein	P4	-2.67837	-2.67837	-0.0577463	0.447559	-2.24558	2.91596	0.432381	0.0577463	5.59433	2.09239e-54
Bm1_03660	translation initiation factor 3 subunit 7	P5	-0.799673	1.32982	0.698446	0.378747	0.147955	-0.147955	-0.36733	-0.692677	2.1295	6.994e-10
Bm1_03665	hypothetical protein		-0.402112	0.252784	0.0235294	0.525322	-0.0650714	-0.0235294	-0.437256	0.189424	0.962578	0.505823
Bm1_03670	hypothetical protein		-0.921829	-0.921829	0.198768	-0.41803	0.119947	-0.0265421	0.0265421	0.0382294	1.1206	0.872746
Bm1_03675	hypothetical protein		-0.746917	-0.746917	-0.746917	-0.0451467	0.0451467	0.19194	0.322759	0.433419	1.18034	0.609355
Bm1_03680	Zinc finger, C2H2 type family protein		0.47009	-0.854409	0.13402	-0.607439	-0.190525	0.369201	0.365942	-0.13402	1.3245	0.083207
Bm1_03685	Guanylate kinase family protein		0.109629	0.721169	-0.109629	0.443569	0.367618	-0.316712	-0.438438	-0.449198	1.17037	0.102568
Bm1_03700	hypothetical protein		2.442	0	0	0	0	0	0.228115	0	2.442	0.280846
Bm1_03705	Twik (KCNK-like) family of potassium channels, alpha subunit 38. C. elegans sup-9 ortholog	P8	-2.78051	-2.78051	-2.29655	-0.661646	0.661646	1.97951	2.16185	0.738	4.94236	4.56453e-33
Bm1_03710	Zinc finger, C2H2 type family protein		-0.31049	1.77961	-0.31049	0.390858	-0.0861711	-0.31049	0.0861711	0.396838	2.0901	0.0444438
Bm1_03715	Zinc finger, C2H2 type family protein	P13	4.4074	-0.0598986	0.263462	-0.846028	-0.358766	-0.159065	0.612389	0.0598986	5.25343	7.81373e-09
Bm1_03720	mothers against decapentaplegic homolog 3		-2.58738	-0.167597	-0.0614664	0.732176	0.133402	0.0614664	0.27439	-0.146862	3.31955	0.309445
Bm1_03725	MH1 domain containing protein	P13	1.73435	-2.50057	0.589685	-0.606223	-0.428892	-0.0343233	0.0343233	0.549474	4.23492	0.0023951
Bm1_03730	hypothetical protein		1.04624	0.321984	-0.154767	0.127865	-0.235208	-0.0602791	0.0602791	-0.278783	1.32502	0.739781
Bm1_03735	hypothetical protein		-3.45196	-1.36106	0.0373478	-0.360205	0.303331	0.275559	0.186235	-0.0373478	3.75529	0.0943074
Bm1_03740	hypothetical protein		0	0	0	0.503798	0.228146	0.310105	0	0	0.503798	0.677796
Bm1_03745	Hsp20/alpha crystallin family protein		-0.630448	-0.630448	-0.630448	0.401395	-0.401395	0.808176	1.0561	0.549281	1.68655	0.0169473
Bm1_03750	Thrombospondin type 1 domain containing protein	P2	-0.692294	0.974184	1.49532	-0.692294	0.0899345	-0.0109037	-0.692294	0.0109037	2.18762	0.000263335
Bm1_03760	FHA domain containing protein		1.25447	0.474494	0.388262	-0.020425	-0.0221252	0.0174535	-0.243236	-0.0174535	1.49771	0.927967
Bm1_03765	hypothetical protein		-0.690102	-0.690102	-0.690102	0.186373	0.229333	-0.0171131	0.112608	0.0171131	0.919435	0.719356
Bm1_03770	FLYWCH zinc finger domain containing protein		-1.23808	-0.175059	0.503142	-0.206783	0.500312	0.266016	0.0511165	-0.0511165	1.74122	0.874276
Bm1_03775	hypothetical protein		1.21207	0.46776	-0.327802	0.341722	-0.389165	0.196805	-0.239127	-0.196805	1.60124	0.396118
Bm1_03780	Hypothetical 38.3 kDa protein in HEM2-OCH1 intergenic region, putative	P10	0.0233136	-0.604796	-0.87046	-0.0969565	-0.0233136	1.68699	2.24976	1.20374	3.12022	2.7904e-23
Bm1_03785	hypothetical protein		0	0	0	0	0.211228	0	0.441705	0.725325	0.725325	0.504251
Bm1_03795	hypothetical protein	P11	0	0	0	0	0	0.311615	1.77086	1.55606	1.77086	0.000646313
Bm1_03800	hypothetical protein	P5	-4.36135	-1.08409	-1.2587	0.296288	0.760919	-0.0289569	0.0289569	0.426005	5.12227	5.68449e-10
Bm1_03805	hypothetical protein		-0.8269	-0.8269	-0.8269	0.345475	0.343393	0.131141	-0.131141	0.539884	1.36678	0.339557
Bm1_03810	Homeobox protein onecut		0.816173	-0.568237	0.285817	0.180907	-0.259678	-0.677863	-0.180907	0.189533	1.49404	0.637308
Bm1_03815	mucin-like protein		-0.548342	-0.548342	-0.0699545	-0.0445438	0.0445438	0.43308	0.299421	0.411714	0.981422	0.872489
Bm1_03820	SKI/SNO/DAC family protein		-1.59664	0.49554	1.0163	-0.178266	-0.570467	0.178266	0.820393	-0.42134	2.61294	0.0420862
Bm1_03825	cAMP-dependent protein kinase catalytic subunit	P2	-0.969124	0.0928172	-0.125621	-0.0928172	0.900006	1.40165	0.77276	-0.259769	2.37078	0.00558989
Bm1_03830	AMP-binding enzyme family protein		-1.27235	-0.211111	0.0999801	-0.0999801	-0.226553	0.438051	0.767687	0.411041	2.04004	0.396351
Bm1_03835	Translin family protein		0.144752	-0.0527148	0.269397	-0.298692	0.0527148	0.207711	-0.734161	-0.505882	1.00356	0.522598
Bm1_03840	hypothetical protein	P5	-1.22525	1.02531	0.402282	0.0840453	0.482991	-0.0840453	-1.01912	-0.524476	2.25056	4.84596e-05
Bm1_03845	hypothetical protein		0.0849638	-0.758246	0.132062	-0.288874	0.00999695	-0.00999695	-0.235061	0.277166	1.03541	0.49838
Bm1_03850	hypothetical protein		-0.39543	0.667625	0.720901	-0.39543	-0.171009	0.171009	-0.39543	0.563779	1.11633	0.104241
Bm1_03855	ATP synthase F1, delta subunit family protein		-0.646689	-0.309294	0.110308	-0.0376724	0.0377866	0.123965	0.0376724	-0.0686103	0.770654	0.902598
Bm1_03860	hypothetical protein		-1.3322	-0.26902	-0.216867	0.391097	0.468811	0.271952	0.152138	-0.152138	1.80101	0.90474
Bm1_03865	dynein light intermediate chain	P4	-0.486168	-0.233299	-0.122028	-0.187892	0.122028	0.55214	0.518815	0.520572	1.03831	5.61726e-05
Bm1_03870	hypothetical protein		0.102084	0.261513	-0.271873	-0.102084	-0.485321	-0.116069	0.445233	0.318381	0.930554	0.0614681
Bm1_03875	protein F32E10.5		-1.08089	0.587647	-0.245701	-0.203629	0.41388	-0.098955	0.289629	0.098955	1.66854	0.864925
Bm1_03880	hypothetical protein		0.556043	0.0454876	0.117303	-0.0454876	-0.104449	-0.171466	0.0660611	-0.0826162	0.727509	0.78546
Bm1_03885	Peptidase family C54 containing protein		-1.73254	-0.369791	0.142567	-0.00146015	-0.302822	0.00146015	0.35402	0.165845	2.08656	0.23534
Bm1_03890	hypothetical protein		-0.210484	0.425748	0.239825	0.200723	-0.0351642	0.0351642	-0.058506	-0.455856	0.881604	0.440482
Bm1_03895	WD-repeat protein		-2.01399	0.0784443	0.781701	0.105012	0.1291	-0.113419	-0.0784443	-0.834505	2.79569	0.26214
Bm1_03900	Nematode cuticle collagen N-terminal domain containing protein	P10	-3.71004	-2.04252	-1.65474	-0.273274	0.273274	4.66939	6.28003	5.79236	9.99007	1.05961e-195
Bm1_03905	hypothetical protein		-0.757125	0.30746	-0.262461	0.413889	0.124175	-0.124175	-0.358358	0.224779	1.17101	0.897501
Bm1_03910	40S ribosomal protein S27	P16	0.699879	1.09618	0.527438	-0.188051	0.188051	-0.703081	-1.69288	-2.1329	3.22908	4.31932e-38
Bm1_03915	VPS28 protein homolog	P16	-0.217592	0.563506	0.253743	0.135924	0.116992	-0.116992	-0.80915	-0.695897	1.37266	3.51108e-05
Bm1_03920	Cytochrome c oxidase subunit IV family protein		-0.974568	-0.0105256	-0.109832	-0.187357	0.11832	0.0105256	0.256322	0.196473	1.23089	0.254759
Bm1_03925	hypothetical protein		0.75637	0.319732	-0.0395325	0.401954	-0.145272	-0.063119	0.0395325	-0.0932871	0.901642	0.302641
Bm1_03930	hypothetical protein		-2.74443	-0.0592518	0.205046	-0.106819	-0.11662	0.0592518	0.631254	0.248452	3.37568	0.324599
Bm1_03935	40S ribosomal protein S4-like		-0.701756	0.802384	0.215873	0.0623863	0.0347325	-0.0347325	-0.0516185	-0.384673	1.50414	0.388045
Bm1_03940	von Willebrand factor type D domain containing protein		0.023542	0.252957	-0.663387	0.344507	-0.971282	0.418561	-0.023542	-0.748149	1.38984	0.115851
Bm1_03945	hypothetical protein		-0.785495	0.273476	0.0779338	-0.0822036	-0.175117	0.705066	0.978658	-0.0779338	1.76415	0.512968
Bm1_03950	Serine/threonine protein phosphatase C34C12.3 in chromosomeIII, putative		-0.0280747	0.142706	0.419985	0.0303405	0.0280747	-0.38408	-0.249567	-0.488445	0.90843	0.244713
Bm1_03955	GrpE protein homolog, mitochondrial precursor	P16	0.115517	0.476437	0.344154	0.117458	-0.115517	-0.284463	-0.496994	-0.754761	1.2312	5.262e-06
Bm1_03960	ribosomal protein L16 containing protein		-0.199898	0.0642633	0.246549	-0.0642633	0.231974	0.159748	-0.316493	-0.621749	0.868298	0.189413
Bm1_03965	hypothetical protein	P15	0.36967	0.249149	0.264031	0.127723	-0.127723	-0.176551	-0.633057	-1.04377	1.41344	0.000493567
Bm1_03975	S-phase kinase-associated protein 1A		0	0	0	0	0	0.566046	0.221383	0	0.566046	0.413923
Bm1_03980	hypothetical protein	P10	-1.07639	-1.07639	-1.07639	-0.199912	0.199912	1.58072	2.52222	1.79909	3.59861	3.28785e-15
Bm1_03990	Nematode cuticle collagen N-terminal domain containing protein	P9	-0.464572	-0.464572	-0.464572	0.237362	-0.237362	0.307773	1.45231	2.13984	2.60441	6.4315e-06
Bm1_03995	serpin (BmSERPIN)	P8	-4.25579	-4.25579	-4.25579	-2.20746	2.20746	3.24838	4.49821	3.58284	8.754	4.33226e-176
Bm1_04000	UPF0017 protein CG3488	P2	-1.0235	-0.639503	0.124134	-0.44848	-0.124134	0.332371	0.645289	0.515421	1.66879	0.000124038
Bm1_04005	PH domain containing protein		-3.55261	-1.13385	-0.671503	-0.232625	0.259569	0.232625	0.309329	0.246384	3.86194	0.0118081
Bm1_04010	EGF-like domain containing protein	P2	-3.6219	0.185883	1.60469	-0.185883	1.82225	1.73061	-0.348021	-0.702155	5.44415	8.87672e-23
Bm1_04030	Calcium binding EGF domain containing protein		0	0	0.872891	0	0	0.1499	0	0.939827	0.939827	0.176278
Bm1_04035	Acid phosphatase B0361.7 precursor		-0.562787	-0.562787	0.820794	0.139601	-0.337816	-0.139601	0.992307	1.24628	1.80906	0.0250424
Bm1_04040	hypothetical protein		0.114399	-0.247016	0.183112	0.347201	0.0758032	-0.157443	-0.376637	-0.0758032	0.723837	0.875388
Bm1_04045	hypothetical protein		0	0	0	0.274164	0	0.173881	0	0.402311	0.402311	0.807642
Bm1_04050	excretory/secretory protein Juv-p120 precursor		-0.211034	-0.211034	-0.211034	0.491372	0.234962	0.211034	-0.211034	0.961736	1.17277	0.213298
Bm1_04055	hypothetical protein		-0.376876	0.0843079	0.122245	0.332411	0.332027	-0.141195	-0.0843079	-0.664122	0.996534	0.593262
Bm1_04060	Malate dehydrogenase, cytoplasmic	P11	-0.962912	0.00340716	-0.150796	-0.280807	-0.00340716	0.611585	3.21744	3.75057	4.71348	1.64007e-133
Bm1_04065	hypothetical protein		-0.105795	-0.105795	-0.105795	0.76883	0.105795	0.179639	-0.105795	0.281342	0.874625	0.531729
Bm1_04070	Salivary glue protein Sgs-3 precursor		-0.370947	-1.7606	-0.29701	0.26845	0.261366	0.238451	0.0871708	-0.0871708	2.02905	0.385303
Bm1_04075	hypothetical protein		-0.0867578	-0.0867578	-0.0867578	0.187391	0.173517	0.0867578	0.139889	-0.0867578	0.274149	0.968416
Bm1_04080	hypothetical protein	P12	-0.828895	-0.828895	-0.348824	0.0475794	-0.0475794	0.147694	0.846821	1.52938	2.35828	0.00992983
Bm1_04095	Ser/Thr protein phosphatase family protein		-1.81271	0.605662	0.985699	-0.00237099	-0.0126792	0.451805	-0.759497	0.00237099	2.79841	0.0420807
Bm1_04100	ATP-dependent DNA helicase, RecQ family protein		-1.19979	0.409861	0.111178	-0.127076	0.00370536	0.157108	-0.292516	-0.00370536	1.60965	0.130522
Bm1_04105	GPI transamidase component PIG-T precursor		-0.369785	0.654135	-0.0419144	0.237705	0.0275695	-0.0275695	0.182819	-0.512819	1.16695	0.245651
Bm1_04110	linker histone H1 and H5 family protein	P14	1.02871	0.470877	-0.302452	0.101567	-0.145848	-0.0288666	-0.196174	0.0288666	1.33116	0.00102329
Bm1_04115	short coiled-coil protein		-0.430699	0.0736763	-0.1178	0.147389	0.410628	0.282967	-0.113856	-0.0736763	0.841327	0.8115
Bm1_04120	Hypothetical 28.6 kDa protein T07A5.2 in chromosome III, putative		-1.49848	0.165377	-0.654381	-0.0806793	0.0806793	0.211901	-0.647226	0.195584	1.71038	0.675112
Bm1_04125	Lipase family protein	P3	-3.59881	-2.53765	1.76521	-1.16983	-0.239876	3.49998	0.239876	0.266583	7.09879	1.82021e-80
Bm1_04130	hypothetical protein		-0.418532	-0.418532	0.711235	0.0852661	0.0238499	-0.108864	-0.0238499	0.285123	1.12977	0.801398
Bm1_04135	hypothetical protein		-1.87066	-0.807848	-0.742679	0.55773	-0.0921191	0.28875	0.0921191	0.750886	2.62155	0.323138
Bm1_04140	hypothetical protein		-0.251419	1.41344	-0.251419	0.0225386	-0.0225386	-0.0933045	0.710477	1.11915	1.66485	0.0386203
Bm1_04145	metalloprotease 1 precursor	P14	5.22666	3.14076	0.346739	0.13686	-0.13686	-0.13686	-0.13686	-0.13686	5.36352	1.33224e-20
Bm1_04150	Prion-like-		-0.642532	0.00473526	0.13319	-0.100716	0.53092	0.320361	-0.00473526	-0.140111	1.17345	0.0186966
Bm1_04155	TBC domain containing protein	P2	-1.65077	-1.65077	-0.521427	-0.774586	0.563555	0.744746	1.13745	0.521427	2.78822	0.000926806
Bm1_04160	WD domain containing protein		-0.761394	-0.761394	-0.28241	0.410982	0.699976	0.360239	0.28241	-0.367421	1.46137	0.484778
Bm1_04165	Iron-sulfur cluster assembly accessory protein		0.749797	-0.900547	0.235129	-0.4508	-0.0843515	0.0843515	-0.466063	0.457917	1.65034	0.525535
Bm1_04175	Histone deacetylase family protein	P12	-0.502514	-0.379068	-0.00266619	0.329493	0.00266619	-0.146982	0.532774	1.31747	1.81998	4.27397e-11
Bm1_04180	hypothetical protein	P12	-1.68289	-0.017537	-0.553084	2.28499	0.832197	-0.472281	0.017537	5.31093	6.99382	6.09607e-92
Bm1_04185	excretory/secretory protein Juv-p120 precursor	P11	-1.23208	-1.23208	-0.742083	-0.0586915	1.32412	0.0586915	1.62652	1.62527	2.8586	0.000236374
Bm1_04195	Transaldolase	P5	-1.55218	0.36389	0.105448	0.679457	-0.0440645	0.0440645	-0.227111	-0.241936	2.23164	0.000939885
Bm1_04200	Protein KIAA0103 homolog	P16	0.317788	0.527952	0.301647	0.192553	-0.192553	-0.218364	-0.743833	-0.692289	1.27179	1.1976e-05
Bm1_04205	Delta-1-pyrroline-5-carboxylate dehydrogenase, mitochondrial precursor	P16	0.0321678	0.560577	0.363968	0.133109	-0.0321678	-0.507859	-1.1941	-2.02251	2.58309	4.15166e-32
Bm1_04210	Protein kinase domain containing protein		-0.237041	0.826089	-0.237041	0.0370368	0.178701	0.199746	-0.0370368	-0.237041	1.06313	0.753336
Bm1_04220	Zinc finger, C2H2 type family protein		0	1.06374	0	0.50452	0	0	0	0	1.06374	0.263993
Bm1_04225	Zinc finger, C2H2 type family protein		2.4586	0	0	0.273396	0.261223	0	0	0	2.4586	0.266692
Bm1_04230	Neurobeachin homolog		1.87033	0.930767	-0.398007	-0.809232	0.0753918	0.0344127	-0.623339	-0.0344127	2.67956	0.0979361
Bm1_04235	hypothetical protein		0	1.06374	0	0.274164	0.261223	0	0	0	1.06374	0.500128
Bm1_04245	Putative eukaryotic translation initiation factor 3 subunit (eIF-3)		-2.4225	-0.00327357	0.00614018	0.354036	-0.306743	0.908025	-0.156428	0.00327357	3.33052	0.085171
Bm1_04250	hypothetical protein		1.35162	0.232598	-0.829641	-0.0552308	0.0552308	-0.146125	-0.507427	0.221974	2.18126	0.434637
Bm1_04255	hypothetical protein		0.213644	-1.17247	-0.316546	-0.604912	-0.135194	0.135194	0.513185	0.228018	1.68566	0.436392
Bm1_04260	Hypothetical 45.9 kDa protein in KCS1-GCV1 intergenic region, putative	P4	0.558772	-1.68681	-2.74898	-0.629908	-0.294684	2.4127	1.97298	0.294684	5.16167	2.54589e-31
Bm1_04265	hypothetical protein		0.395236	-0.00849221	0.0922578	-0.335498	-0.0421014	0.246777	0.00849221	-0.250693	0.730734	0.956172
Bm1_04270	ubiquitin thiolesterase homolog		-1.82834	0.419103	0.443758	0.502382	0.104382	-0.104382	-0.611961	-0.306782	2.33072	0.0126636
Bm1_04295	Stomatin protein 2		-0.154933	-0.154933	-0.154933	0.547354	-0.154933	0.154933	0.538556	0.239326	0.702287	0.427461
Bm1_04305	hypothetical protein		1.23187	-1.22053	-0.740618	-0.343555	0.352564	0.737455	0.0409032	-0.0409032	2.45239	0.100085
Bm1_04325	Nematode cuticle collagen N-terminal domain containing protein	P12	-1.65029	-1.65029	-1.65029	-0.35047	0.360553	0.35047	2.49118	6.86783	8.51812	7.57075e-125
Bm1_04330	endonuclease G, mitochondrial precursor		-2.41035	-0.319471	0.114768	-0.782875	-0.072183	0.072183	0.411724	0.254618	2.82207	0.281728
Bm1_04345	nuclear hormone receptor		0	0	0	0.273396	0	0	0.197417	0.390953	0.390953	0.764328
Bm1_04350	hypothetical protein		0.902699	1.13195	0.0238867	-0.0238867	-0.257367	-0.498544	0.189084	-0.838331	1.97029	0.310983
Bm1_04360	Zinc finger, C2H2 type family protein		2.97929	-0.310847	-0.310847	0.193927	0.0884449	-0.310847	-0.0776889	0.0776889	3.29013	0.06281
Bm1_04370	Dopey, N-terminal domain containing protein	P6	-1.43289	0.459077	0.0393669	-0.265833	-0.307744	0.216257	0.601848	-0.0393669	2.03474	0.00212814
Bm1_04375	TBC domain containing protein	P6	-1.8654	0.823657	-1.8654	0.384644	-0.71264	-0.159809	0.159809	0.667972	2.68906	0.00638824
Bm1_04380	Transthyretin-like family protein	P10	-1.32733	-1.32733	-0.198154	0.198154	-0.884056	0.922974	3.16726	3.67802	5.00535	2.86174e-33
Bm1_04385	alpha/beta hydrolase		0	0	0	0	0	0	0.19682	0.390633	0.390633	0.760756
Bm1_04390	HMG box family protein		1.04852	1.29088	0.166419	-0.518589	0.630593	-0.166419	-0.369234	-0.435693	1.80947	0.298659
Bm1_04395	hypothetical protein		-0.206275	0.858517	0.660391	-0.206275	0.448964	0.206275	-0.206275	-0.206275	1.06479	0.244822
Bm1_04400	Helix-hairpin-helix motif family protein	P5	-0.759122	1.60502	1.03272	0.503319	0.142747	-0.142747	-0.505308	-1.04918	2.6542	8.38141e-09
Bm1_04405	BED zinc finger family protein	P12	-0.131624	-0.337879	0.524904	0.291145	0.131624	-0.628315	-0.36181	0.655728	1.28404	0.00256158
Bm1_04410	hypothetical protein	P11	-0.109712	-0.109712	-0.109712	0.163657	0.109712	-0.109712	3.06077	2.27382	3.17048	2.22233e-11
Bm1_04415	repeat motif-containing gene		-0.104162	-0.104162	-0.104162	0.5963	0.104162	-0.104162	0.686562	0.623543	0.790724	0.434457
Bm1_04425	hypothetical protein	P10	-0.593355	-0.593355	-0.108441	0.108441	-0.349186	2.0551	5.39862	3.03482	5.99198	3.41953e-73
Bm1_04435	hypothetical protein		-0.191414	-0.191414	-0.191414	0.0828237	0.212939	-0.038844	0.038844	0.212202	0.404353	0.95709
Bm1_04440	60S ribosomal protein L11	P16	0.754478	0.741063	0.233971	-0.00653881	0.00653881	-0.546216	-1.80987	-2.02769	2.78217	4.75728e-56
Bm1_04445	hypothetical protein		-1.0085	-1.0085	0.565893	-0.130931	0.455303	0.120039	0.0413883	-0.0413883	1.5744	0.774562
Bm1_04450	Paramyosin	P10	-2.45673	-2.41102	-1.79264	-0.226393	0.226393	1.9376	3.34758	3.09708	5.80431	4.52757e-131
Bm1_04465	linker histone H1 and H5 family protein		-1.14059	0.690626	-0.564181	0.188592	-0.274844	0.138696	-0.138696	0.428372	1.83122	0.283293
Bm1_04490	hypothetical protein		0	0	0	0.274164	0	0.173881	0.22728	0	0.274164	0.910687
Bm1_04495	hypothetical protein		0	0	0	0	0	0	0.687036	0.401173	0.687036	0.198364
Bm1_04505	MGC85231 protein	P5	-0.873985	1.54523	0.702676	1.31244	-0.093624	-0.0872233	-0.320597	0.0872233	2.41921	0.00331206
Bm1_04510	hypothetical protein		0	0	0.474783	0	0	0.453527	0	0	0.474783	0.445479
Bm1_04555	GH23727p		-1.7569	-0.0927467	-0.628891	0.42815	-0.0130816	0.0130816	0.182031	0.0582811	2.18505	0.834963
Bm1_04565	hypothetical protein		-2.68617	0.000363139	-0.622971	-0.000363139	-0.145254	0.612188	0.204723	0.711942	3.39811	0.0622055
Bm1_04570	hypothetical protein	P12	-1.77797	-0.109179	0.509349	0.0328713	-0.0328713	-0.816505	0.282603	1.74104	3.51901	0.000379293
Bm1_04580	Integrase core domain containing protein		0	0	0	0	0	0.153507	0	0.390633	0.390633	0.807316
Bm1_04585	Hepatocellular carcinoma-associated antigen 59 family protein	P2	-1.37908	-0.0171102	1.10913	0.0171102	0.69943	1.08691	-0.303487	-0.24771	2.48821	4.73674e-08
Bm1_04590	hypothetical protein		0.564888	0.571371	0.341539	-0.150596	0.0238526	-0.0238526	-0.592715	-0.268596	1.16409	0.0746901
Bm1_04595	hypothetical protein		0.23624	0.407143	-0.207061	0.113293	-0.0404027	-0.214226	-0.0768672	0.0404027	0.621369	0.855344
Bm1_04600	D-tyrosyl-tRNA(Tyr) deacylase		-0.138202	0.214776	0.0810639	0.177693	0.142738	-0.120845	-0.0810639	-0.594287	0.809062	0.523753
Bm1_04605	Protein C14orf4 homolog	P2	-3.51135	-1.84489	0.181401	-0.161951	0.587511	0.428801	-0.206342	0.161951	4.09886	0.00159888
Bm1_04610	zgc:73290 protein		-0.82081	-0.855021	0.495155	-0.0777697	0.321757	0.449777	-0.49913	0.0777697	1.35018	0.167167
Bm1_04615	hypothetical protein		0.604564	1.06306	0.176281	0.45783	-0.176281	-0.498828	-0.910912	-1.85466	2.91772	0.0124741
Bm1_04620	40S ribosomal protein S24	P15	0.82417	0.628106	0.2311	-0.0997115	0.0997115	-0.459213	-1.44585	-1.84186	2.66603	1.57378e-34
Bm1_04625	CG3921-PA		2.3289	0.131852	-0.690464	-0.503405	0.286161	-0.223266	-0.131852	0.621378	3.01937	0.158219
Bm1_04630	hypothetical protein		-2.34321	-0.676738	-0.763093	0.341955	0.337046	-0.337046	0.359738	0.813249	3.15646	0.0352261
Bm1_04635	hypothetical protein		-1.00518	0.054681	-0.174154	-0.128702	0.598263	0.0733013	0.213404	-0.054681	1.60344	0.908392
Bm1_04640	Plasmid Maintenance Protein containing protein		0.0530086	0.330482	-0.00486376	0.00486376	0.00756185	-0.183003	-0.0777027	-0.28695	0.617432	0.78973
Bm1_04650	diacylglycerol kinase	P1	-2.28155	-0.190605	0.0296761	-0.0296761	-0.629596	0.372268	0.939745	1.19462	3.47618	0.000737314
Bm1_04660	replication licensing factor MCM7		0.309845	-0.0478804	0.662586	0.0478804	0.103996	-0.445798	-0.202941	-1.17757	1.84016	0.142347
Bm1_04665	2,3-bisphosphoglycerate-independent phosphoglycerate mutase, putative	P6	-1.73432	0.0129945	-0.152394	-0.0129945	-0.125879	0.164684	0.974944	1.05348	2.7878	1.2203e-13
Bm1_04670	Serine-rich protein-like		-0.916603	0.144284	-0.0786416	-0.642678	0.140975	-0.0335965	0.0335965	0.259348	1.17595	0.811081
Bm1_04680	hypothetical protein		-0.223146	-0.223146	-0.223146	-0.223146	0.223146	0.244197	1.2286	1.29866	1.5218	0.0100888
Bm1_04685	hypothetical protein	P6	-1.39677	-0.335625	-0.269965	0.129422	-0.129422	0.551105	1.40586	0.660916	2.80263	0.00530228
Bm1_04690	zgc:92784		0.592625	-0.567384	-0.384318	0.0654409	-0.0035171	0.0035171	-0.0480987	0.326335	1.16001	0.86027
Bm1_04695	Cuticle collagen F09G8.6	P3	-1.19395	-0.133621	1.58576	0.614873	-0.455105	2.84133	0.133621	-0.240746	4.03528	5.73012e-12
Bm1_04705	hypothetical protein	P10	-0.205161	-0.205161	-0.205161	-0.205161	0.205161	1.22135	2.77225	2.82635	3.03151	1.50974e-09
Bm1_04710	hypothetical protein		-0.117333	0.940437	0.983269	-0.117333	-0.117333	0.16916	0.117333	-0.117333	1.1006	0.225909
Bm1_04715	Plexin repeat family protein		-3.00789	-0.916136	0.639063	-0.10516	0.109331	0.533227	0.10516	-0.339439	3.64696	0.0661341
Bm1_04720	hypothetical protein		0	0	0	0.274149	0.260275	0.329477	0	0	0.329477	0.825498
Bm1_04725	Helix-loop-helix DNA-binding domain containing protein		0.505121	-1.948	-0.0254031	0.0254031	-0.0833856	-0.862482	0.558447	0.40135	2.50645	0.0396303
Bm1_04735	hypothetical protein		-1.103	-0.0389131	0.0389131	0.0706302	0.374971	-0.771078	-0.873958	0.290057	1.47797	0.21598
Bm1_04740	Regulator of presynaptic activity aex-3	P9	-1.81645	-0.754484	-1.3321	0.155993	-0.155993	0.455914	1.47895	1.38775	3.2954	2.73731e-07
Bm1_04750	Fork head domain containing protein		1.63764	1.36771	-0.0147169	-0.388709	0.0147169	-0.401855	0.305682	-0.375505	2.03949	0.0860247
Bm1_04755	hypothetical protein		-0.13072	-0.13072	-0.13072	-0.13072	0.13072	0.759604	0.983095	0.847395	1.11381	0.123206
Bm1_04760	Hypothetical tyrosinase-like protein C02C2.1 in chromosome III, putative		0.680789	-0.113614	-1.30745	0.113614	-0.149335	-1.0902	0.31591	0.891903	2.19935	0.0920373
Bm1_04770	hypothetical protein		-0.784901	0.372296	-0.0661495	-0.224245	0.0792783	-0.207326	0.0661495	0.391734	1.17664	0.0739975
Bm1_04775	hypothetical protein	P16	1.51775	1.87132	0.752428	-0.079799	0.079799	-0.0972689	-0.739195	-0.166826	2.61052	0.000103681
Bm1_04780	hypothetical protein		1.30693	-0.0613846	0.478691	-0.550297	-0.271225	0.178681	-0.148231	0.0613846	1.85723	0.0795334
Bm1_04785	AN1-like Zinc finger family protein		1.22079	-0.901616	0.122262	0.274126	0.0228617	-0.13394	-0.0704765	-0.0228617	2.1224	0.49838
Bm1_04790	Platelet-activating factor acetylhydrolase, plasma/intracellular isoform II family protein		-0.0128408	0.261914	-0.181878	0.0128408	0.0253	-0.285508	-0.412496	0.176156	0.674411	0.166987
Bm1_04795	Gem-associated protein 7		0.368057	-0.25785	-0.631813	-0.513819	0.464232	-0.327148	0.467388	0.25785	1.0992	0.0317368
Bm1_04800	60S ribosomal protein L23a	P16	0.567563	0.730698	0.164758	-0.129511	0.129511	-0.449116	-1.11771	-1.49369	2.22439	1.26117e-25
Bm1_04805	Carboxylesterase family protein	P14	0.722772	0.424325	0.0143297	0.0289461	-0.0143297	-0.306354	-0.518432	-0.21471	1.2412	0.000502308
Bm1_04810	hypothetical protein		-1.94455	-0.280891	0.779969	0.644099	-0.0181988	0.0181988	-0.46131	0.382648	2.72452	0.43415
Bm1_04815	hypothetical protein		-0.639755	0.179853	0.328119	0.450917	0.126125	-0.126125	-0.294378	-0.209547	1.09067	0.0163925
Bm1_04820	vesicle trafficking protein SEC22b	P5	-4.33097	0.24311	0.786735	-0.101208	0.392858	0.101208	-0.278179	-0.346237	5.1177	4.4162e-05
Bm1_04825	glutathione reductase		-0.292928	0.382022	0.233624	-0.0264351	0.0450561	0.0264351	-0.319181	-0.471265	0.853287	0.00876712
Bm1_04830	15 kDa selenoprotein precursor		-1.75967	0.0351231	0.0494685	-0.144592	-0.0351231	0.060792	0.204408	-0.165137	1.96408	0.183824
Bm1_04835	Hypothetical 38.1 kDa protein in RCK1-AMS1 intergenic region, putative	P10	-1.52167	-1.52167	-1.52167	-1.248	1.248	3.14961	4.73332	4.63514	6.25499	2.62744e-82
Bm1_04840	KH domain containing protein	P15	0.744039	0.532965	0.115715	-0.126052	0.151122	-0.115715	-0.501318	-0.541672	1.28571	1.05286e-05
Bm1_04845	Alcohol dehydrogenase I		-0.18268	0.47167	-0.097517	0.097517	0.234105	-0.204421	0.256801	-0.374177	0.845847	0.789488
Bm1_04850	Hypothetical FAD-dependent oxidoreductase YEL047C		-0.00916962	0.328173	0.173442	0.0853799	0.00916962	-0.168293	-0.416496	-0.359127	0.744669	0.0669924
Bm1_04855	hypothetical protein		-0.495116	-0.0346159	-0.632156	0.0346159	0.662303	0.49226	0.183277	-0.597738	1.29446	0.0504022
Bm1_04860	hypothetical protein	P9	-4.40652	-3.34558	-1.78743	2.21772	-0.461668	1.24678	2.37462	0.461668	6.78115	1.03126e-41
Bm1_04865	DNA polymerase epsilon p17 subunit		-0.723281	0.249733	0.0814554	-0.295892	0.162497	0.519534	-0.0814554	-0.378091	1.24281	0.251791
Bm1_04870	hypothetical protein	P11	0	0	0	0	0	0	1.26968	1.36713	1.36713	9.5323e-05
Bm1_04880	NADH-ubiquinone oxidoreductase AGGG subunit homolog, mitochondrialprecursor	P7	-1.18278	-0.855711	-0.220205	-0.0796677	0.0796677	0.185496	0.672423	1.24718	2.42997	5.11485e-17
Bm1_04885	Hypothetical tyrosinase-like protein C02C2.1 in chromosome III, putative	P9	-0.186517	-0.186517	-0.186517	2.35256	0.0330606	-0.0330606	3.3958	5.83022	6.01673	3.18914e-29
Bm1_04895	hypothetical protein		-0.547964	-0.547964	-0.0675018	-0.27408	0.0675018	0.662462	0.41151	1.13264	1.68061	0.155186
Bm1_04900	eukaryotic translation initiation factor 2 subunit 1	P16	0.520603	0.594978	0.209642	0.0568405	-0.0568405	-0.611227	-1.25151	-1.39284	1.98782	4.58018e-12
Bm1_04905	mitochondrial prohibitin complex protein 1	P15	0.903534	0.62587	0.0250594	-0.0224501	0.0224501	-0.408757	-1.38873	-1.39152	2.29505	7.31447e-24
Bm1_04910	60S ribosomal protein L27a	P16	0.604632	0.61031	0.132334	-0.132334	0.169755	-0.406259	-1.52125	-1.94987	2.56018	7.6233e-37
Bm1_04915	60S acidic ribosomal protein P1	P16	0.142322	0.912425	0.30962	-0.142322	0.218346	-0.299575	-0.485281	-1.21778	2.13021	5.39046e-13
Bm1_04920	ADP-ribosylation factor family		-0.322222	-0.322222	0.164529	0.380099	0.311674	-0.164529	0.229505	-0.322222	0.702321	0.653846
Bm1_04925	coronin 2A		-0.242498	-0.242498	0.225932	0.0306797	-0.0306797	0.544322	1.05509	-0.242498	1.29758	0.371552
Bm1_04930	SET domain containing protein	P12	0.113797	-0.0548912	-0.0584765	-0.407224	-0.362586	0.0548912	0.32326	0.777774	1.185	6.73118e-08
Bm1_04935	hypothetical protein		-1.4028	-1.4028	-0.558941	0.0146695	-0.0146695	0.290416	0.609678	0.655434	2.05824	0.281658
Bm1_04955	hypothetical protein	P4	-1.49196	-0.836359	-0.110047	-0.057275	0.057275	0.968582	1.03622	0.971812	2.52818	1.32926e-06
Bm1_04965	CG6817-PA	P12	-0.29244	-0.29244	-0.29244	-0.0183462	0.153955	0.0183462	0.28002	1.74847	2.04091	0.00963557
Bm1_04970	hypothetical protein		-1.93735	1.16844	0.258001	0.375968	-0.653734	-0.45196	-0.00703183	0.00703183	3.10579	0.076105
Bm1_04975	Hypothetical RING finger protein F54G8.4 in chromosome III, putative	P11	-1.23412	-0.17157	-0.390255	-0.730326	0.17157	0.501552	2.48294	2.62672	3.86084	1.80992e-14
Bm1_04980	Hypothetical RING finger protein F54G8.4 in chromosome III, putative	P7	-4.54473	-2.87872	-0.857202	0.10057	-0.10057	0.376611	2.41144	2.78108	7.3258	3.15576e-93
Bm1_04985	transcription factor E74 isoform		-1.09802	-1.09802	0.258485	0.529454	-0.334515	0.132287	0.145802	-0.132287	1.62747	0.640902
Bm1_04990	Homeobox protein Nkx-6.1		-0.116609	-0.116609	-0.116609	0.386216	0.153688	-0.116609	0.116609	0.2719	0.502825	0.7524
Bm1_04995	hypothetical protein		0	0	0	0	0.220498	0.173881	0.197417	0	0.220498	0.93282
Bm1_05005	hypothetical protein	P13	-0.713336	-2.10328	-1.10156	-0.0383828	0.487438	0.17808	0.521806	0.0383828	2.62509	0.00120066
Bm1_05010	Autophagy protein Apg5 containing protein		-0.835541	-0.374781	0.060621	0.00291996	0.160223	-0.084601	-0.00291996	0.481607	1.31715	0.758113
Bm1_05015	Nuclear hormone receptor-like 1	P9	-1.02612	-1.02612	-1.02612	0.274048	-0.274048	0.563208	0.872373	1.23608	2.2622	0.00471092
Bm1_05025	Cadherin domain containing protein		-0.461959	-0.461959	-0.461959	0.83855	-0.208107	0.902433	0.208107	0.490537	1.36439	0.105386
Bm1_05030	hypothetical protein		-0.0960171	-0.0960171	-0.0960171	0.406741	0.300448	0.241338	0.0960171	-0.0960171	0.502758	0.863575
Bm1_05035	excretory/secretory protein Juv-p120 precursor	P8	-2.6615	-2.6615	-2.18109	0.115139	0.14309	-0.0524612	0.0524612	0.384822	3.04632	0.000293342
Bm1_05045	Carboxypeptidase A2 precursor	P11	-0.967866	0.0913888	-0.967866	-0.0913888	0.207933	-0.532292	3.13896	3.82803	4.79589	9.09536e-18
Bm1_05050	hypothetical protein		-0.0966526	-0.0966526	-0.0966526	-0.0966526	0.118173	0.239095	0.0966526	0.308269	0.404922	0.903725
Bm1_05060	hypothetical protein		-1.39575	-1.39575	0.364587	0.0233919	0.344852	0.144939	-0.0731877	-0.0233919	1.76034	0.761533
Bm1_05065	SON protein		0	0	0.473915	0	0	0	0	0.402667	0.473915	0.582873
Bm1_05070	hypothetical protein	P7	-1.01638	-1.01638	0.559135	0.0154368	-0.572223	-0.0154368	1.67515	1.51629	2.69153	1.14468e-05
Bm1_05075	hypothetical protein	P13	1.09042	0.0333413	-0.654613	-0.41956	-0.685818	-0.0333413	0.30449	0.891517	1.77624	1.25923e-09
Bm1_05095	hypothetical protein		-2.01891	-0.351564	-0.263733	-0.0458383	0.537564	0.834237	0.722036	0.0458383	2.85315	0.128161
Bm1_05100	hypothetical protein		-2.26783	-0.211873	0.0635674	0.220688	0.254935	-0.0635674	0.0973201	-0.31139	2.52276	0.142665
Bm1_05110	Alpha-mannosidase C1orf22		1.65409	-1.64882	-0.0549476	-0.0217234	0.0217234	-0.213316	0.064534	0.154762	3.30291	0.574802
Bm1_05115	hypothetical protein		-0.344696	1.75436	1.03001	0.358734	0.0563486	-0.0563486	-0.344696	-0.344696	2.09906	0.0336225
Bm1_05120	hypothetical protein		-0.0350685	0.0350685	0.291481	0.100637	0.176283	-0.158436	-0.426569	-0.370806	0.718049	0.328978
Bm1_05125	hypothetical protein	P11	-0.370443	-0.370443	0.11894	-0.0963624	-0.370443	0.0963624	1.47164	0.588619	1.84209	0.00329059
Bm1_05130	hypothetical protein		0	0	0	0	0.219689	0	0.19682	0	0.219689	0.859753
Bm1_05135	hypothetical protein	P7	-1.62459	-1.62459	-0.780672	-0.452215	0.510669	0.452215	1.09002	0.71556	2.71462	0.00888001
Bm1_05145	EAP30 subunit of ELL complex		1.5532	-0.696669	0.155445	0.0520319	-0.383464	-0.0520319	-0.233287	0.294754	2.24987	0.678958
Bm1_05155	Zinc finger, C2H2 type family protein		0	1.05954	0	0	0	0.154162	0.370349	0	1.05954	0.501977
Bm1_05160	Troponin T	P1	-4.53152	-2.06088	-1.18625	-0.139599	0.39501	1.50152	1.43608	0.139599	6.03304	5.51831e-59
Bm1_05165	hypothetical protein		-0.522399	-0.522399	0.82748	0.179446	0.121084	0.339084	-0.297564	-0.121084	1.34988	0.563779
Bm1_05190	hypothetical protein		0	0	0	0.273376	0	0	0	0.390633	0.390633	0.706492
Bm1_05195	hypothetical protein		0	0	0	0.274185	0	0	0.19682	0	0.274185	0.833009
Bm1_05225	hypothetical protein		0.510981	-0.26837	0.487398	-0.125393	0.389446	-0.210257	-0.155046	0.125393	0.779351	0.844631
Bm1_05230	hypothetical protein		-1.19582	-1.19582	0.176969	0.526191	-0.166879	0.233971	-0.351423	0.166879	1.72201	0.502909
Bm1_05255	hypothetical protein		0	0	0	0	0	0.156026	0.550479	0.392618	0.550479	0.544767
Bm1_05260	Pou domain - N-terminal to homeobox domain containing protein		0.290254	-0.874983	-0.337608	-0.619091	-0.0804003	0.195314	0.0804003	0.215067	1.16524	0.295782
Bm1_05265	Homeobox domain containing protein		1.44649	-0.192642	-0.725204	0.0335937	-0.339472	-0.0335937	0.250312	0.492306	2.17169	0.507365
Bm1_05270	hypothetical protein		0	1.06374	0	0	0	0.311147	0	0	1.06374	0.428414
Bm1_05275	phosphomevalonate kinase		-1.56169	1.12317	0.634623	0.0657797	-0.0657797	0.477529	-0.602198	-0.854632	2.68486	0.03864
Bm1_05280	Protein transport protein SEC61 gamma subunit		-0.437112	0.062434	0.584428	-0.0583414	0.0583414	0.43069	-0.281205	-0.940183	1.52461	0.0282676
Bm1_05285	hypothetical protein	P3	-1.6289	-1.6289	2.52774	0.488639	0.752539	0.72429	-0.488639	-0.927188	4.15664	4.1566e-10
Bm1_05290	hypothetical protein	P3	-3.26371	-3.26371	2.81687	0.25241	1.14984	1.33487	-0.25241	-0.392223	6.08058	2.05322e-31
Bm1_05295	hypothetical protein	P4	-1.21413	-0.151628	-0.0853563	0.0853563	-0.449151	1.35024	1.85856	1.24584	3.07269	2.5242e-05
Bm1_05300	glutathione synthetase family protein		-0.985973	0.0618914	0.212484	-0.0259301	0.0259301	0.158026	-0.402159	-0.374622	1.19846	0.117981
Bm1_05305	hypothetical protein	P14	0.455874	0.294929	0.113497	0.199739	-0.113497	-0.461654	-0.659255	-0.462507	1.11513	0.00119787
Bm1_05310	hypothetical protein		-1.06418	-1.06418	0.288042	-0.361783	-0.0244475	0.0244475	0.276131	0.307945	1.37213	0.773899
Bm1_05315	hypothetical protein		-0.248501	-0.248501	0.595764	0.0256032	-0.0256032	-0.248501	0.124264	0.143371	0.844265	0.618103
Bm1_05320	cystathionine gamma-lyase	P5	-1.10305	0.142483	-0.0529787	0.676119	1.00383	0.0529787	-0.638307	-0.30437	2.10688	2.2778e-06
Bm1_05325	Protein kinase domain containing protein		0	0	0	0	0.444134	0.310177	0.202842	0	0.444134	0.760768
Bm1_05330	probable sodium-dependent inorganic phosphate cotransporter, putative		-0.634528	-0.634528	-0.159453	0.398905	0.403729	-0.0511013	0.0511013	0.0729016	1.03826	0.88022
Bm1_05335	snx17-prov protein		-2.04766	0.0433316	0.373198	0.139079	-0.0433316	0.0949187	-0.242483	-0.10511	2.42085	0.885848
Bm1_05340	hypothetical protein		0.535122	0.989272	-0.792287	0.26493	-0.26493	-0.71905	-0.955789	0.50329	1.94506	0.0506931
Bm1_05345	WD-repeat protein 3		-1.67145	-0.00672176	1.05022	0.915892	0.734698	-0.172256	-0.326294	0.00672176	2.72167	0.059531
Bm1_05350	MGC81364 protein	P7	-2.08832	-2.08832	-0.322607	0.596693	0.268481	0.824758	1.70537	-0.268481	3.79369	1.78829e-07
Bm1_05360	hypothetical protein		-0.884817	0.779048	1.02237	0.41527	-0.0146701	0.0146701	-0.0521956	-0.884817	1.90719	0.158973
Bm1_05385	SNARE domain containing protein		-1.15928	0.0845428	0.45848	0.0804862	0.531664	-0.0804862	-0.193952	-0.455886	1.69095	0.115722
Bm1_05390	hypothetical protein	P6	-1.68063	-0.619486	-0.83351	0.21344	-0.21344	0.86436	1.07142	1.42097	3.1016	0.000179201
Bm1_05395	Formin Homology 2 Domain containing protein		2.19149	-0.263512	-0.263512	0.0105216	-0.0105216	0.996087	0.821865	-0.263512	2.455	0.0166017
Bm1_05400	KIAA0892 protein		-3.03858	-0.127243	0.121289	-0.0956322	-0.372282	0.0956322	0.426618	0.592804	3.63139	0.13773
Bm1_05405	hypothetical protein	P14	3.08458	3.59577	1.86541	0.258535	-0.258535	-0.838269	-0.779058	-0.765513	4.43404	4.81214e-22
Bm1_05410	P22U	P10	-0.26048	-0.26048	-0.26048	0.0134608	-0.0134608	2.84264	5.31963	3.61419	5.58011	2.9496e-51
Bm1_05415	glycosylphosphatidylinositol anchor attachment 1 (GPAA1)-like		0.428544	0.498103	0.0793404	-0.043285	-0.284563	0.043285	-0.182547	-0.617315	1.11542	0.56126
Bm1_05420	Golgi-specific DHHC zincfinger protein		-0.592898	0.235516	0.46098	0.0137506	-0.0137506	0.0730349	-0.624428	-0.302085	1.08541	0.32539
Bm1_05425	Zinc finger in N-recognin family protein		-0.149952	0.115759	0.111357	0.585554	0.339543	-0.111357	-0.128795	-0.163326	0.74888	0.157529
Bm1_05430	GPI transamidase subunit PIG-U family protein		-0.540209	0.192655	0.0985409	0.134774	0.0229949	-0.0229949	-0.390701	-0.231276	0.732864	0.697034
Bm1_05435	hypothetical protein		-0.247182	-0.0116348	0.44708	0.0321778	0.142158	0.0116348	-0.469086	-1.01901	1.46609	0.274612
Bm1_05440	Thioredoxin family protein	P5	-0.787071	0.177676	-0.177676	0.281261	0.369965	0.259657	-0.295253	-0.547232	1.15704	0.000324863
Bm1_05445	Variant SH3 domain containing protein	P7	-1.07124	-0.609203	-0.0735825	0.0735825	-0.102961	0.245435	0.594846	0.969212	2.04045	0.00511218
Bm1_05450	GTP-ase activating protein for Arf containing protein	P6	-2.13949	0.253259	-0.35031	-0.195114	-0.312027	0.195114	0.383189	0.507035	2.64652	3.63289e-06
Bm1_05455	seven transmembrane domain protein		-0.443746	0.136221	0.0634632	0.326112	0.171182	-0.0634632	-0.299363	-0.473965	0.800078	0.229243
Bm1_05460	Type III restriction enzyme, res subunit family protein	P5	-3.71268	0.925422	0.426168	0.610259	0.244774	-0.244774	-0.839546	-0.375696	4.6381	1.87106e-05
Bm1_05465	hypothetical protein	P6	-2.27293	0.643418	-1.1443	-0.463896	-1.15553	1.33014	0.732329	0.463896	3.60306	1.79659e-06
Bm1_05470	hypothetical protein	P1	-4.78756	-0.976416	0.630169	-0.376518	-0.189145	0.989547	0.963567	0.189145	5.77711	1.80337e-13
Bm1_05475	exonuclease family protein		-2.97179	0.137615	-0.0766662	-0.332991	-0.67115	0.113089	0.7659	0.0766662	3.73769	0.057064
Bm1_05480	hAT family dimerisation domain containing protein		-0.980635	0.266718	0.0224983	-0.0224983	0.0981121	-0.0395522	-0.142968	0.0856921	1.24735	0.972035
Bm1_05485	hypothetical protein		-0.218661	-0.250637	-0.141597	-0.240038	0.141597	0.260181	0.269996	0.675207	0.925843	0.560777
Bm1_05490	hypothetical protein		0.0475179	0.283964	0.621233	0.0803677	-0.0475179	-0.333581	-0.462225	-0.584285	1.20552	0.363379
Bm1_05495	hypothetical protein		-2.53272	0.742756	0.749859	0.370525	0.267284	-0.379486	-0.267284	-0.26755	3.28258	0.117258
Bm1_05500	hypothetical protein		-2.08126	0.340096	-0.0307057	0.860877	0.341654	0.0307057	-0.261306	-0.401282	2.94214	0.172839
Bm1_05505	Innexin family protein	P6	-1.71049	-0.730166	-0.821274	0.0198211	-0.0198211	0.495693	0.21956	0.38668	2.20618	0.000739756
Bm1_05510	Voltage-gated calcium channel, T-type, alpha subunit. C. elegans cca-1 ortholog	P12	-0.139934	-0.290371	-0.433751	0.0359406	-0.0359406	0.0644985	0.945412	1.55419	1.98794	1.89552e-14
Bm1_05515	Protein phosphatase 2C containing protein		-0.0918698	0.147349	0.739215	0.0487016	-0.0487016	-0.121816	0.298552	-0.595148	1.33436	0.432627
Bm1_05520	hypothetical protein		0.565006	0.436136	0.28044	0.0594208	-0.107459	-0.233212	-0.0594208	-0.0793016	0.798218	0.804395
Bm1_05525	5'-AMP-activated protein kinase, beta subunit, complex-interacting region containing protein		-0.882129	0.180674	0.500354	-0.180674	-0.656078	0.397514	-0.192381	1.36656	2.24869	0.0243067
Bm1_05530	ADP,ATP carrier protein 1		-2.71124	-1.65021	-1.13047	0.150105	-0.0685549	0.0685549	0.190534	0.390245	3.10149	0.0617445
Bm1_05535	arrestin domain containing protein	P10	-0.137823	-0.395808	-0.383561	-0.199925	0.310924	0.251941	0.621389	0.137823	1.0172	0.00235941
Bm1_05540	hypothetical protein		0.626739	-0.0575816	0.0575816	0.240371	-0.115618	-0.146984	0.124625	-0.152875	0.779614	0.804736
Bm1_05545	lactamase, beta 2	P6	-2.84436	0.0681059	-0.323144	-0.0681059	-0.384837	0.498304	1.4575	0.585092	4.30186	6.36025e-08
Bm1_05550	hypothetical protein		-1.17136	-0.110968	-0.0432126	0.875928	0.0432126	-0.0976152	0.60566	0.205758	2.04729	0.552585
Bm1_05575	hypothetical protein	P9	-4.57226	-5.35763	-2.5786	1.75697	-1.4052	1.4052	5.20052	3.58573	10.5581	9.80781e-131
Bm1_05580	Glycine-rich cell wall structural protein 1 precursor	P7	-4.04884	-4.40719	-0.314788	1.45682	-2.12009	0.314788	3.44012	1.47752	7.84731	2.74893e-85
Bm1_05590	Cyclic-nucleotide gated cation channel, C. elegans tax-4 ortholog		-0.378227	-0.378227	0.447714	0.124749	0.727323	-0.378227	-0.0117756	0.0117756	1.10555	0.262366
Bm1_05595	KH domain containing protein		-0.108469	-0.108469	-0.108469	-0.108469	0.65886	0.201334	0.108469	0.85223	0.960699	0.268158
Bm1_05600	hypothetical protein		0	0	0	0	0.219689	0.153507	0	0	0.219689	0.898964
Bm1_05605	Ssu72-like protein		-3.1958	0.914834	0.540389	-0.0694333	0.0694333	0.26044	-0.191399	-0.461799	4.11064	0.0916658
Bm1_05610	hypothetical protein	P14	0.956114	0.332114	-0.507174	0.276079	0.248055	-0.248055	-0.692537	-0.612866	1.64865	0.000511284
Bm1_05615	hypothetical protein	P8	-0.93364	-0.93364	-0.93364	-0.429581	1.27809	1.21512	1.07373	0.429581	2.21174	0.000141541
Bm1_05620	hypothetical protein		0.498571	0.620749	0.215406	0.0523036	-0.150801	-0.0523036	-0.699178	-0.54779	1.31993	0.367319
Bm1_05625	oxidoreductase, zinc-binding dehydrogenase family protein		-0.00389775	-0.403676	-0.0816031	0.00389775	0.253229	0.0370902	-0.359285	0.0693879	0.656905	0.848155
Bm1_05640	Ammonium transporter 3		-2.39235	-1.33154	0.142064	0.468544	0.46575	0.275855	-0.142064	-0.233762	2.8609	0.317876
Bm1_05645	hypothetical protein		0	0	1.37277	0	0.767417	0	0.204796	0	1.37277	0.0174551
Bm1_05650	hypothetical protein		0	0	0	0.5038	0	0.153879	0	0	0.5038	0.639902
Bm1_05655	Phosphatidylinositol 3- and 4-kinase family protein	P13	0.0230452	-0.469052	-0.225922	-0.0230452	-0.0660326	0.147269	0.671003	0.487932	1.14005	0.000270594
Bm1_05660	signal transduction protein CBL-B		0.917823	0.00242196	-0.0400317	0.0855774	-0.181211	-0.00242196	0.0349066	-0.722775	1.6406	0.207945
Bm1_05665	hypothetical protein	P1	-2.48003	-1.41825	-0.721604	-0.228623	0.228623	1.07991	1.59609	1.03551	4.07612	4.22696e-11
Bm1_05675	cuticular collagen Bmcol-2	P6	-3.25031	-0.889671	-2.01285	-0.234694	0.389684	0.234694	3.89221	3.70063	7.14251	2.84084e-72
Bm1_05680	hypothetical protein		0	0	0	0	0	0.437393	0.815468	0	0.815468	0.150005
Bm1_05690	Low-density lipoprotein receptor domain class A containing protein	P8	-2.48197	-1.42092	-2.48197	-0.509062	1.02669	1.81595	1.56331	0.509062	4.29792	1.78251e-17
Bm1_05695	hypothetical protein		-0.423212	-0.423212	0.0627783	0.0805855	0.191245	0.0244869	-0.423212	-0.0244869	0.614458	0.702916
Bm1_05700	proteasome subunit alpha type 6	P16	-0.0161599	0.537673	0.559593	-0.0262003	0.356427	0.0161599	-0.512587	-0.865358	1.42495	6.024e-13
Bm1_05705	hypothetical protein		-0.336611	0.140055	0.16563	0.0519179	0.00709424	-0.00709424	-0.332274	-0.360283	0.525914	0.314597
Bm1_05710	hypothetical protein		-0.520768	-0.520768	-0.0305036	-0.520768	0.805267	0.0305036	0.466117	0.429343	1.32604	0.207945
Bm1_05715	60S ribosomal protein L28	P15	0.98355	0.707122	0.352155	-0.198335	0.198335	-0.379014	-1.42761	-1.82751	2.81106	2.3201e-48
Bm1_05720	Protein kinase domain containing protein	P15	0.449776	0.160226	0.284529	0.00633949	-0.00633949	-0.425699	-0.846188	-0.677799	1.29596	0.00329824
Bm1_05725	Acyltransferase family protein	P3	-0.737786	-1.36305	0.653535	-0.313254	-1.07782	1.67418	1.43126	0.313254	3.03723	9.92237e-21
Bm1_05740	Vinculin family protein		-0.596245	-0.165155	0.165155	0.336289	0.338333	0.223337	-0.190636	-0.405483	0.934578	0.0223634
Bm1_05745	hypothetical protein		-0.0624926	-0.287668	-0.0332927	0.0191888	-0.0191888	0.0813186	0.354557	0.339009	0.642226	0.349774
Bm1_05750	hypothetical protein		0	0	0	0	0.447828	0	0.197417	0	0.447828	0.649135
Bm1_05765	Zinc finger, C2H2 type family protein		-0.59866	0.461206	-0.108716	0.278368	0.16045	-0.271309	-0.177436	0.108716	1.05987	0.897582
Bm1_05785	hypothetical protein	P4	0	0	0	0	0	5.12447	4.16484	2.8853	5.12447	2.39393e-37
Bm1_05790	XPG N-terminal domain containing protein		-1.58384	0.835404	-0.000701486	-0.056574	0.212983	-0.0513875	0.000701486	0.376396	2.41924	0.893297
Bm1_05795	hypothetical protein	P10	-2.05823	-2.05823	-1.5775	-0.0857704	0.0857704	1.37329	2.79285	3.71347	5.77171	6.22126e-52
Bm1_05805	Nematode cuticle collagen N-terminal domain containing protein	P4	-0.20061	-0.20061	-0.20061	-0.20061	0.2135	2.09645	1.18368	0.20061	2.29706	1.24018e-05
Bm1_05810	small nuclear ribonucleoprotein Sm D3	P15	1.19698	0.954948	0.527017	0.306284	-0.635243	-0.306284	-1.09959	-1.00165	2.29657	7.83572e-06
Bm1_05820	hypothetical protein		-0.410285	0.64928	0.0645837	-0.410285	0.346954	0.00829899	-0.212311	-0.00829899	1.05956	0.641373
Bm1_05825	Homeobox domain containing protein		-1.49055	-0.429514	0.094533	-0.189731	-0.094533	0.583463	1.13548	1.02837	2.62602	0.027297
Bm1_05830	hypothetical protein		-1.4515	0.213972	-0.0746471	0.0746471	-0.292166	-0.170905	0.0816708	0.36572	1.81722	0.913738
Bm1_05835	hypothetical protein		-1.93703	-0.875903	0.1195	0.314228	-0.128271	0.269671	0.207969	-0.1195	2.25126	0.762966
Bm1_05840	myocyte nuclear factor-beta		-2.69449	-1.02802	-0.266877	0.0814298	-0.0814298	0.359192	0.390884	0.245524	3.08537	0.36357
Bm1_05845	hypothetical protein		-2.4969	-0.130293	-0.14171	0.0956194	0.0797225	0.261061	0.194164	-0.0797225	2.75797	0.142665
Bm1_05850	Nuclear hormone receptor family member nhr-40		-2.11854	0.406918	0.603925	0.181676	-0.0181164	0.0181164	-0.0446255	-0.0187009	2.72247	0.0723714
Bm1_05855	hypothetical protein		-0.335849	-0.335849	-0.335849	0.167948	0.599161	-0.167948	0.820817	0.843847	1.1797	0.100166
Bm1_05865	Glutamate receptor 1 precursor	P8	-2.64043	-1.57917	-1.27061	0.0908757	0.474149	0.16023	-0.0908757	0.790424	3.43086	0.0015841
Bm1_05870	Innexin inx-7	P2	-0.411002	0.475642	1.12359	0.279978	0.314467	-0.279978	-0.367755	-0.626511	1.7501	3.84953e-05
Bm1_05880	hypothetical protein		0	0	0	0	0.219689	0	0	0.402667	0.402667	0.737387
Bm1_05885	T-box protein 12		-0.954704	0.713514	-0.110888	-0.0778867	0.0700903	-0.0700903	0.101032	0.723543	1.67825	0.80426
Bm1_05890	B20-1 protein	P11	-0.965486	-0.729689	-0.0267554	-0.158631	0.0267554	0.154793	2.19009	2.24392	3.2094	1.77897e-34
Bm1_05895	Gex interacting protein protein 16, isoform d	P9	-0.842259	-1.04784	-1.19972	0.59889	0.0309384	-0.0309384	1.54136	1.79563	2.99536	1.37893e-25
Bm1_05900	hypothetical protein		-0.315808	-0.315808	-0.315808	0.385928	-0.0493614	0.0982304	0.0493614	0.404835	0.720643	0.838059
Bm1_05905	hypothetical protein	P2	-0.80042	-1.20215	-0.301693	-0.310768	1.14278	0.953773	0.766068	0.301693	2.34493	1.75906e-10
Bm1_05910	hypothetical protein		-1.95042	0.139914	1.075	-0.139914	0.225955	0.247933	-0.280939	-0.986845	3.02542	0.0258125
Bm1_05915	ATP-dependent helicase		1.35508	0.125931	-0.0106634	0.114702	0.0106634	-0.244428	-0.410501	-0.25342	1.76558	0.0115606
Bm1_05920	Uncoordinated protein 2, isoform c	P7	-2.09765	-2.09765	-1.25778	-0.469685	0.469685	0.931407	1.81938	2.1545	4.25215	1.60821e-16
Bm1_05925	EGF-like domain containing protein	P11	-0.060215	0.060215	-1.9995	0.386348	-0.341178	-1.02026	2.24899	3.61416	5.61365	3.81273e-67
Bm1_05930	Muscle positioning protein 4	P11	0.526211	-0.865746	-1.08288	1.12823	-0.526211	-0.873804	2.82595	3.73858	4.82146	1.7518e-43
Bm1_05935	hypothetical protein	P5	-3.72257	-0.617106	0.327622	0.122641	0.77563	0.529442	-0.122641	-0.207054	4.4982	0.000585412
Bm1_05940	hypothetical protein	P10	-0.252189	-0.252189	-0.252189	0.252189	-0.252189	2.03532	4.55322	2.11073	4.80541	3.7115e-24
Bm1_05945	Transcription factor AP-2 family protein	P4	-3.88557	-0.607933	-0.442441	0.57971	-1.16117	1.89324	1.98236	0.442441	5.86793	4.34923e-31
Bm1_05950	hypothetical protein		-0.651736	-0.303253	-0.0709072	0.142771	-0.103401	0.0709072	0.180409	0.0997178	0.832145	0.88576
Bm1_05955	Elongation factor Tu C-terminal domain containing protein		-0.299018	-0.33383	-0.512318	0.0252739	-0.0252739	0.145103	0.0976688	0.270457	0.782775	0.128261
Bm1_05960	Patched family protein	P11	-0.556694	-0.0956335	-0.494605	0.116524	0.0956335	-0.599119	4.13659	5.42787	6.02699	1.67631e-105
Bm1_05965	hypothetical protein		0.0762102	-0.0762102	-0.550861	-0.680354	0.298196	0.128604	0.247278	-0.177696	0.97855	0.0907825
Bm1_05970	hypothetical protein		-0.869524	1.54522	0.258283	0.161816	0.607652	-0.572881	-0.161816	-0.476692	2.41475	0.0664724
Bm1_05975	Neurotransmitter-gated ion-channel transmembrane region family protein	P11	-0.480356	-0.480356	-0.480356	-0.20646	0.426864	0.20646	2.08182	3.11137	3.59173	4.07588e-17
Bm1_05980	hypothetical protein		-0.573381	0.487769	-0.573381	-0.573381	0.197036	-0.133658	0.602605	0.133658	1.17599	0.123606
Bm1_05985	hyperosmotic protein 21		1.31777	0.0402793	0.387925	-0.0766878	0.219074	-0.0402793	-0.26223	-0.109113	1.58	0.217089
Bm1_06000	hypothetical protein	P12	0	0	0	0	0	0	0.575238	4.89091	4.89091	1.89076e-53
Bm1_06010	hypothetical protein		-1.2256	-0.164504	0.529506	-0.523563	-0.065572	0.065572	0.456873	0.936659	2.16226	0.231173
Bm1_06020	Neurobeachin homolog		1.1593	-1.08594	0.0538321	-0.521602	-0.282113	0.262571	-0.0538321	0.110965	2.24523	0.562276
Bm1_06030	gene 11-1 protein precursor	P12	0	0	0	0	0	0	0.214344	3.47443	3.47443	2.39283e-23
Bm1_06035	Tudor domain containing protein		-3.48494	0.325401	0.525913	0.204955	-0.0539802	0.0539802	-0.120026	-0.186438	4.01086	0.305313
Bm1_06050	Fork head domain containing protein		-1.6924	-1.6924	0.366056	0.202196	0.621158	-0.202196	0.524894	-0.31808	2.31356	0.16616
Bm1_06055	tRNA-Ser		0	0	0	0	0	0.311245	0	0	0.311245	0.742578
Bm1_06060	hypothetical protein		0	0	0	0.274185	0	0.153507	0	0	0.274185	0.874276
Bm1_06065	hypothetical protein	P14	3.50644	1.95557	0.636659	-0.227095	0.0503907	-0.0503907	-0.52578	-0.731146	4.23758	6.53216e-06
Bm1_06070	coatomer alpha subunit		-0.188881	-0.0635675	0.281623	0.00681611	0.206389	0.281926	-0.00681611	-0.55618	0.838105	0.0027583
Bm1_06080	hypothetical protein	P12	-0.265844	-0.265844	-0.265844	0.00759945	-0.00759945	0.734636	1.348	2.34023	2.60607	6.58187e-05
Bm1_06085	hypothetical protein		-1.28867	-0.226525	0.287696	-0.411956	0.272665	-0.0843972	0.168478	0.0843972	1.57637	0.881458
Bm1_06090	MAS20 protein import receptor containing protein	P16	0.580241	0.919419	0.30406	-0.30406	0.450455	-0.33313	-1.56871	-1.57633	2.49575	1.50678e-15
Bm1_06095	Hypothetical 99.7 kDa protein in SDL1 5'region precursor, putative	P2	-2.65338	-0.986915	0.13951	-1.35286	-0.13951	0.252661	0.489488	0.68986	3.34324	0.000352138
Bm1_06100	DNA mismatch repair protein MutL containing protein		-2.98465	0.122545	0.406194	0.208823	0.312507	-0.54116	-0.122545	-0.929114	3.39084	0.033103
Bm1_06105	XPA protein N-terminal containing protein		0.189432	-0.166208	-0.346738	0.378595	-0.0160291	0.152715	0.0160291	-0.210433	0.725333	0.940252
Bm1_06110	RIKEN cDNA 5830427H10 gene	P15	0.350831	0.20028	0.179326	0.129651	-0.129651	-0.596788	-0.865098	-1.57479	1.92562	2.95138e-05
Bm1_06120	hypothetical protein		-2.00855	-0.343071	-0.432003	0.304574	0.0538256	-0.0466584	0.485466	0.0466584	2.49402	0.663701
Bm1_06125	hypothetical protein	P1	-4.24754	-2.58108	-0.960763	-0.188141	0.188141	0.901334	1.69135	1.88675	6.13429	3.20356e-46
Bm1_06130	Nuclear anchorage protein 1	P2	-1.78154	-1.81631	-0.357632	-0.514235	0.366596	0.357632	0.364103	0.450725	2.26704	3.95783e-13
Bm1_06140	Pyruvate kinase, alpha/beta domain containing protein	P10	-0.22921	-0.22921	-0.22921	-0.22921	0.22921	2.28768	4.40232	4.36948	4.63153	1.07768e-41
Bm1_06145	Pygopus homolog 1		0.922583	-0.726697	0.0347699	-0.1414	-0.0347699	0.203579	-0.142946	0.138461	1.64928	0.905966
Bm1_06150	hypothetical protein	P5	-4.02703	-0.595823	-1.00597	-0.0799688	0.129941	0.199616	0.2524	0.0799688	4.27943	0.00738307
Bm1_06155	hypothetical protein	P2	-2.74395	-0.0581128	0.799162	-0.557349	0.673598	1.11361	-1.05759	0.0581128	3.85756	8.62035e-09
Bm1_06160	zyg-9 protein		-0.620212	-0.19341	-0.261198	-0.22723	0.212825	0.19341	0.363625	0.233425	0.983838	0.0118359
Bm1_06170	Uncharacterized protein family UPF0005 containing protein		-0.80373	0.280372	0.338651	0.155061	-0.0704148	-0.195603	-0.0601637	0.0601637	1.14238	0.0995583
Bm1_06175	cathepsin L-like cysteine proteinase		-0.735938	-0.735938	0.648911	-0.0346253	0.15672	0.0346253	-0.185914	0.215231	1.38485	0.831466
Bm1_06180	Papain family cysteine protease containing protein		-0.0796834	-0.0796834	-0.0796834	-0.0796834	0.362603	0.0796834	0.314943	0.627403	0.707087	0.622612
Bm1_06185	Papain family cysteine protease containing protein		-0.30982	0.754379	0.18351	0.193161	-0.0915734	-0.15696	-0.0802308	0.0802308	1.0642	0.916035
Bm1_06190	60S ribosomal protein L24 (L30)	P16	0.429657	0.63472	0.187622	-0.0292932	0.0292932	-0.312834	-0.993715	-1.31508	1.9498	3.7597e-20
Bm1_06195	hypothetical protein		1.2139	0.802854	0.0903578	-0.0903578	0.35168	-0.4979	-0.291717	-1.45481	2.66871	0.0120254
Bm1_06200	hypothetical protein		0.255997	-0.101546	-0.00736144	-0.144287	0.00736144	-0.0755502	0.897899	0.482046	1.04219	0.226231
Bm1_06205	cleavage stimulation factor		-0.661334	0.563185	0.147075	0.0129366	0.35248	-0.0129366	-0.12437	-0.578793	1.22452	0.0406866
Bm1_06210	RH61522p		-1.05919	0.510842	-0.103714	-0.41709	0.0321068	0.0559574	-0.0321068	0.228642	1.57004	0.599862
Bm1_06215	hypothetical protein		0	0	0	0	0.44854	0.290968	0.36766	0	0.44854	0.732989
Bm1_06220	hypothetical protein		-1.15671	1.26258	-0.681863	0.73666	0.547796	-0.863955	-0.371103	0.371103	2.41929	0.0223801
Bm1_06225	Immunoglobulin I-set domain containing protein	P5	-3.45601	-0.178384	0.731925	0.820737	0.422306	0.112257	-0.255468	-0.112257	4.27675	0.00225306
Bm1_06230	Immunoglobulin I-set domain containing protein	P5	-1.40269	0.228227	0.308197	0.00660972	0.0187187	-0.00660972	-0.301293	-0.390532	1.71088	0.00872662
Bm1_06235	hypothetical protein		1.09954	-1.356	-0.00284847	-0.654118	0.223229	-0.0345299	0.0952404	0.00284847	2.45555	0.615136
Bm1_06240	Conserved hypothetical protein		-0.231295	-0.231295	-0.231295	0.271575	0.0373902	0.0570363	-0.0373902	0.157672	0.50287	0.954659
Bm1_06245	hypothetical protein	P7	-2.22697	-2.22697	-0.310287	0.503801	-0.155391	0.155391	2.12243	1.76953	4.3494	2.71387e-11
Bm1_06250	SET domain containing protein		0.53844	0.341783	-0.218769	0.0450054	-0.0102308	-0.0506356	-0.183528	0.0102308	0.757209	0.529906
Bm1_06255	Type I phosphodiesterase / nucleotide pyrophosphatase family protein	P8	-3.98877	-2.92739	-3.50714	-0.638954	0.638954	1.99825	1.71738	1.17832	5.98702	3.08742e-63
Bm1_06260	Hypothetical 36.5 kDa protein K01A12.3 in chromosome X, putative		-2.13558	-1.07495	0.0691585	1.1232	0.106342	-0.422527	0.444808	-0.0691585	3.25878	0.0290907
Bm1_06265	hypothetical protein		-0.770366	-0.770366	0.0673257	1.04061	1.15891	0.433217	-0.0766187	-0.0673257	1.92928	0.0593604
Bm1_06270	hypothetical protein	P2	-1.26746	-0.20731	1.30068	1.04667	1.49907	0.20731	-0.578937	-0.300942	2.76652	0.00207967
Bm1_06275	SET domain containing protein	P1	-2.49617	-0.405199	0.722103	0.558574	0.0300922	-0.0300922	1.21515	-0.136677	3.71132	0.00195909
Bm1_06280	hypothetical protein	P12	-2.12211	-2.12211	-0.550194	0.129119	-0.129119	1.26795	2.12454	3.9387	6.06082	1.97452e-44
Bm1_06285	cleft lip and palate associated transmembrane protein 1, putative		-0.431367	0.398253	0.00069531	-0.00069531	0.0463781	-0.00123362	0.0173065	-0.282054	0.82962	0.332734
Bm1_06290	hypothetical protein		0	0	0	0	0	0.292662	0.397558	0	0.397558	0.662233
Bm1_06300	integrase		0	0	0	0	0	0.174358	0.19682	0	0.19682	0.910687
Bm1_06315	hypothetical protein		-0.15521	-0.15521	-0.15521	-0.15521	0.264285	0.15521	0.534491	0.237791	0.6897	0.605877
Bm1_06320	hypothetical protein		-1.1567	-1.1567	-0.0386876	-0.279772	0.0386876	0.0650627	0.909321	1.17737	2.33406	0.0652107
Bm1_06325	SD27140p	P11	-1.07044	-1.07044	-0.226579	0.347352	0.204868	-0.204868	1.1799	1.46952	2.53997	0.00463057
Bm1_06330	hypothetical protein		0	0	0.491678	0	0	0.153879	0.22728	0	0.491678	0.816506
Bm1_06335	CX module family protein		-1.8075	-1.8075	-0.231839	0.622011	0.385693	-0.0271114	0.0271114	0.134518	2.42951	0.31215
Bm1_06340	hypothetical protein	P4	-4.49979	-2.40804	-0.0322738	0.0322738	-2.06568	3.62997	1.19307	0.279633	8.12976	6.33796e-112
Bm1_06345	High temperature-induced dauer formation protein 1, isoform b, putative		-1.0893	-0.0857822	0.142465	-0.123181	0.0726869	0.161958	-0.0726869	0.102933	1.25125	0.573161
Bm1_06350	Zinc finger, C2H2 type family protein		-0.221224	0.439537	-0.0178794	0.250811	0.0178794	-0.0442857	0.183623	-0.117016	0.660761	0.694613
Bm1_06355	oxidoreductase, short chain dehydrogenase/reductase family protein		-1.33895	0.32317	0.325878	0.176412	0.031853	-0.031853	-0.325889	-0.164533	1.66483	0.517654
Bm1_06360	3-hydroxyacyl-CoA dehydrogenase type II	P15	0.119539	0.21558	0.383977	0.033313	-0.033313	-0.286729	-1.47789	-1.17022	1.86187	1.27005e-20
Bm1_06365	hypothetical protein		0.72231	-0.204268	-0.0824354	0.046898	-0.0671465	-0.042514	0.042514	0.346518	0.926578	0.169197
Bm1_06370	Sulfotransferase domain containing protein		-0.832058	0.0803836	-0.0689639	0.0899966	0.108523	-0.167097	0.0689639	-0.200481	0.940581	0.574759
Bm1_06375	SD22372p		-0.701126	-0.737127	0.0952518	0.0264013	0.0434049	-0.0897556	0.40955	-0.0264013	1.14668	0.383573
Bm1_06380	DnaJ domain containing protein		-0.0359633	0.200453	-0.553522	-0.297181	0.0937447	-0.168447	0.0359633	0.113321	0.753976	0.92931
Bm1_06385	Ras-related protein ypt4		-0.173752	-0.207037	0.11031	-0.106673	0.157222	-0.24808	0.345085	0.106673	0.593165	0.688498
Bm1_06390	beta-lactamase family protein	P8	-1.82711	-1.82711	-1.82711	0.291985	0.433603	0.714094	0.993863	-0.291985	2.82098	0.000118673
Bm1_06395	multidrug resistance related protein 1	P8	-1.9977	-1.96997	-1.14879	0.0236755	-0.0236755	0.311691	0.627453	0.168594	2.62515	5.20401e-22
Bm1_06400	hypothetical protein	P2	-0.497717	-0.837971	-0.28642	-0.0795156	0.775506	0.839219	0.0795156	0.440366	1.67719	1.98622e-08
Bm1_06405	Septin 6		-0.131736	-0.131736	-0.131736	1.16886	0.131736	0.472456	0.445366	-0.131736	1.3006	0.202186
Bm1_06410	acetyltransferase, GNAT family protein		0.284945	-0.0296845	0.635449	0.387598	-0.106063	0.0296845	-0.451031	-0.608409	1.24386	0.0380352
Bm1_06415	hypothetical protein		-0.259071	0.086193	0.129007	0.206416	0.0167281	-0.219287	-0.115992	-0.0167281	0.465488	0.749308
Bm1_06420	hypothetical protein		-0.360329	0.293276	0.0627518	0.169616	-0.0297513	-0.242925	0.0297513	-0.134112	0.653606	0.96957
Bm1_06425	Inhibitor of Apoptosis domain containing protein	P13	0.563066	-0.216087	0.418468	0.705293	0.216087	-1.19744	-1.04991	-1.1753	1.90273	0.00105643
Bm1_06430	TBC domain containing protein		0.255886	-0.147325	-0.00714872	-0.143372	-0.125636	0.00714872	0.070978	0.117551	0.403211	0.920688
Bm1_06435	hypothetical protein		1.11522	-0.0422242	-0.110851	0.00312449	0.151783	-0.00312449	0.222546	-0.371971	1.48719	0.84703
Bm1_06440	hypothetical protein	P5	-3.26006	0.308691	0.470793	0.744712	0.379863	-0.324765	-0.308691	-1.1024	4.00477	0.000280948
Bm1_06445	Transthyretin-like family protein	P6	-2.38453	-0.262902	-0.726042	-0.189488	0.189488	0.254913	1.31139	1.88829	4.27282	5.93423e-32
Bm1_06450	Ubiquitin family protein		-0.0141249	0.177569	0.0798402	-0.0734592	0.0607163	0.0141249	-0.07576	-0.123546	0.301115	0.912779
Bm1_06455	TIP41-like family protein		1.11445	-0.247905	0.0963507	-0.0602128	-0.273037	0.0602128	0.362409	-0.163494	1.38749	0.375085
Bm1_06460	hypothetical protein		-0.670122	-0.670122	0.166324	-0.166324	-0.245833	0.310099	0.995263	0.691465	1.66538	0.147851
Bm1_06465	chromosome segregation protein smc1		-1.45945	0.956466	0.58393	0.16563	-0.3137	0.225021	-0.16563	-0.297664	2.41592	0.711287
Bm1_06470	hypothetical protein		0.650962	-0.732263	-0.676318	0.0161327	-0.0161327	-0.254385	0.387576	0.282974	1.38322	0.747907
Bm1_06475	Hypothetical 18.4 kDa protein T05H10.3 in chromosome II precursor	P3	-2.95368	-2.95368	0.317172	-0.317172	-0.998689	2.91648	3.41386	1.35121	6.36755	8.09259e-46
Bm1_06480	OTU-like cysteine protease family protein		-0.34686	0.083937	0.0743096	-0.0743096	-0.301367	0.0791148	0.124832	-0.110592	0.471692	0.768537
Bm1_06485	Yippee-like protein 5		-3.57109	-1.48066	-0.411232	-0.192298	0.253841	0.300038	0.192298	0.323552	3.89464	0.0226767
Bm1_06490	hypothetical protein		-3.88372	-0.314648	-0.0253391	-0.0174611	0.0174611	0.0585023	0.576289	0.498639	4.46001	0.0284795
Bm1_06495	hypothetical protein		-3.30356	0.897006	0.246004	0.132001	-0.846782	-0.45513	0.113473	-0.113473	4.20056	0.0128545
Bm1_06500	KIAA0033		-0.540686	0.145027	-0.0618267	-0.193703	-0.262922	0.0618267	0.399953	0.131887	0.940639	0.243777
Bm1_06505	WD-repeat protein BING4	P15	0.917548	0.407432	0.255316	-0.108028	0.108028	-0.141994	-0.757456	-0.809922	1.72747	6.01708e-05
Bm1_06510	WD-repeat protein BING4	P5	-1.22089	0.830053	0.285786	-0.108851	0.180496	0.108851	-0.686182	-0.862939	2.05095	1.55386e-05
Bm1_06515	hypothetical protein		-0.419768	0.188378	0.273844	0.0490739	0.121618	-0.0490739	-0.0662351	-0.343934	0.693612	0.862594
Bm1_06520	EF hand family protein	P1	-3.48437	-1.3928	-0.686076	-0.290583	0.290583	0.757323	1.33643	1.42982	4.91419	2.5934e-16
Bm1_06525	hypothetical protein		1.79787	-2.04082	-0.294806	-0.319654	-0.686267	0.294806	0.394907	0.699582	3.83868	0.0164456
Bm1_06530	Temporarily assigned gene name protein 150, isoform b	P6	-2.48482	-0.819183	-0.72604	0.104375	-0.104375	0.590887	1.293	0.868707	3.77781	4.10729e-05
Bm1_06535	signal recognition particle 9 kDa protein homolog		-2.79429	0.117048	0.431386	0.332145	0.296896	-0.117048	-0.29018	-0.438264	3.22568	0.231669
Bm1_06540	Zinc finger, C2H2 type family protein		0.316081	0.435497	-0.0434682	0.0600787	0.0434682	-0.476658	-0.163719	-0.254334	0.912155	0.744493
Bm1_06545	hypothetical protein		-0.824234	-0.208579	0.0484988	-0.0743057	-0.0484988	0.114932	0.273633	0.389088	1.21332	0.208613
Bm1_06550	Protein kinase domain containing protein		-0.0359672	0.0889439	-0.0984372	-0.19597	0.106619	-0.00823361	0.00823361	0.217706	0.413676	0.924642
Bm1_06555	wnt family protein		-0.698657	-0.698657	0.144818	0.333414	0.346907	0.181398	-0.144818	-0.698657	1.04556	0.436392
Bm1_06560	hypothetical protein		0.608987	-0.609497	-0.172207	-0.0152382	0.0152382	-0.13547	0.0488091	0.292276	1.21848	0.925688
Bm1_06565	spliced leader 30 kDa protein		0.452907	0.918357	0.201213	0.0661963	-0.0661963	-0.177963	-0.450353	-0.670674	1.58903	0.0529001
Bm1_06570	3-oxo-5-alpha-steroid 4-dehydrogenase 1		-0.534519	-0.892201	-0.0350828	0.0350828	0.0645808	0.209095	0.520157	-0.173754	1.41236	0.437963
Bm1_06575	hypothetical protein		-0.051636	0.654881	0.0347404	0.417302	-0.0347404	0.0889152	-0.324392	-0.260265	0.979273	0.393211
Bm1_06580	60s ribosomal protein L49, mitochondrial		0.119589	0.902915	0.175876	0.0932573	-0.146707	-0.0932573	-0.435759	-0.692433	1.59535	0.0246113
Bm1_06585	hypotetical protein, conserved		0.015604	-0.30248	0.215538	-0.0929045	-0.015604	-0.054029	0.325569	0.263515	0.628049	0.679464
Bm1_06590	Animal haem peroxidase family protein	P10	-1.21489	-1.21489	-0.0850757	0.0850757	-0.772576	2.86444	6.14079	4.02067	7.35567	1.4075e-107
Bm1_06605	SH2 domain containing protein		0	0	0	0.274185	0	0	0	0.390633	0.390633	0.706413
Bm1_06610	Cell wall protein DAN4 precursor		-0.16624	-0.16624	-0.16624	0.336741	-0.16624	0.16624	0.381856	0.23708	0.548096	0.702072
Bm1_06615	40S ribosomal protein S4	P16	0.929579	0.847839	0.355684	-0.162634	0.162634	-0.566715	-1.2105	-1.51134	2.44092	1.7808e-37
Bm1_06620	CG7849-PB		0.262311	0.387484	-0.0354257	0.0307363	-0.0307363	0.0850842	-0.767402	-0.874201	1.26168	0.0277932
Bm1_06625	homolog of yeast longevity gene protein 2, isoform a	P6	-3.23743	1.39947	0.0427355	-0.0427355	-0.104822	-0.407307	0.843222	1.01587	4.6369	2.58699e-06
Bm1_06630	NAC domain containing protein	P15	1.22689	0.793491	0.132095	-0.132095	0.227163	-0.427555	-0.965793	-1.24068	2.46757	2.80973e-24
Bm1_06635	60S ribosomal protein L17	P16	0.372545	0.640563	0.287047	-0.0728738	0.0728738	-0.574193	-1.45414	-1.75702	2.39758	3.61838e-40
Bm1_06640	Protein phosphatase inhibitor containing protein		-2.37223	-0.705758	0.336248	0.00118612	-0.00118612	0.244588	0.17183	-0.314471	2.70848	0.705973
Bm1_06645	hypothetical protein		-2.33397	0.57665	0.76152	0.0393687	0.199942	-0.21306	-0.0393687	-0.512005	3.09549	0.24641
Bm1_06650	hypothetical protein		-2.87186	-1.81065	-1.11899	0.183739	0.438291	0.0395329	-0.0395329	0.375652	3.31015	0.0102409
Bm1_06655	hypothetical protein	P4	-0.37899	-0.122615	0.606954	0.489623	-0.864417	0.278113	0.122615	-0.139808	1.47137	0.00180976
Bm1_06660	hypothetical protein	P5	-3.70163	1.22166	0.758435	0.856625	0.735417	-0.735417	-0.963986	-1.17601	4.92328	3.54248e-18
Bm1_06665	Transmembrane amino acid transporter protein	P12	-2.05656	-2.05656	-0.138948	0.962424	0.138948	-0.155063	0.607059	2.62668	4.68325	2.17534e-20
Bm1_06670	Acid phosphatase F26C11.1		-3.44589	-1.02668	0.119479	0.123212	-0.161446	-0.119479	0.304887	0.453904	3.89979	0.115569
Bm1_06675	protein-S isoprenylcysteine O-methyltransferase		-2.55267	0.132968	-0.132968	-0.366293	-0.141155	0.556224	0.147154	0.828625	3.3813	0.117583
Bm1_06680	KH domain containing protein	P16	-0.229963	0.128065	0.30424	-0.128065	0.255043	0.327237	-1.01143	-1.3574	1.68464	8.04547e-15
Bm1_06685	Ser/Thr protein phosphatase family protein	P13	0.265508	-1.4905	-1.1626	-0.638876	-0.117669	1.05218	1.39401	0.117669	2.88452	7.75998e-20
Bm1_06690	hypothetical protein	P11	-0.861935	-0.861935	-0.0145381	0.0145381	-0.24638	0.338149	3.17555	1.49547	4.03748	1.14449e-24
Bm1_06695	hypothetical protein	P11	-0.93084	-0.0376092	-0.716256	0.0515149	0.0376092	-0.809525	3.20002	1.83247	4.13086	7.2778e-135
Bm1_06700	hypothetical protein		0	0	0	0	0.930478	0.781273	0.704428	0	0.930478	0.117051
Bm1_06705	probable ribosylglycoyhdrolase		-1.67239	-0.00278382	-0.065059	0.376246	0.0818463	0.188856	-0.025613	0.00278382	2.04863	0.976115
Bm1_06710	hypothetical protein	P3	0.112844	0.0757687	0.557193	-0.0757687	-0.882841	0.29408	-1.2588	-0.389302	1.816	0.000969203
Bm1_06715	hypothetical protein		-1.38493	-0.325021	-0.245719	-0.0834338	0.0834338	0.476493	0.257453	0.42934	1.86142	0.890762
Bm1_06720	hypothetical protein		-1.16717	0.499339	-0.336603	-0.135444	-0.217959	0.135444	0.587819	0.19003	1.75499	0.816277
Bm1_06725	hypothetical protein		2.14623	-0.412941	-0.170183	0.170183	-0.203139	0.324293	0.409817	-0.272573	2.55917	0.284364
Bm1_06730	Snowski, identical	P6	-3.29653	0.514366	-0.134167	0.193449	-0.728937	-0.0980703	0.615753	0.0980703	3.91228	0.00960576
Bm1_06735	GBF1 protein		-1.28738	-0.226303	0.0851664	-0.255679	0.0769258	-0.0769258	0.454268	0.529947	1.81732	0.755303
Bm1_06740	kinesin family member 12	P12	0	0	0	0	0	0.944771	0.89716	2.04514	2.04514	0.000848078
Bm1_06750	Ras-related protein Rab-30		-2.97481	-0.0626266	0.361386	-0.243626	0.205558	0.0508699	-0.0508699	0.181845	3.33619	0.675102
Bm1_06755	endochitinase	P4	-0.223345	0.836479	-0.223345	-0.223345	0.223345	1.68218	0.463308	-0.223345	1.90553	0.00042171
Bm1_06760	zgc:100814 protein	P8	-1.16036	-1.1917	-0.453239	0.98562	1.80025	1.50447	0.453239	-0.618715	2.99194	3.49248e-22
Bm1_06765	gamma-secretase subunit pen-2		-2.70312	0.401941	0.0173245	-0.0173245	0.550663	-0.397317	0.0899159	-0.5388	3.25378	0.140689
Bm1_06770	hypothetical protein		-0.386862	-0.0344904	-0.0270289	0.245216	-0.044506	0.0270289	0.216104	0.536167	0.923029	0.547991
Bm1_06775	hypothetical protein		1.03194	-0.0371467	0.0371467	0.249418	0.055005	-0.0565133	-0.293383	-0.526064	1.558	0.129078
Bm1_06780	TAP42-like family protein	P6	-1.98405	0.141347	-0.225693	-0.141347	-0.156432	0.196581	0.67093	0.740915	2.72496	4.26295e-05
Bm1_06785	hypothetical protein		0.17795	-0.00479047	-0.0392674	0.280054	-0.0965128	0.00479047	-0.547579	0.140628	0.827633	0.298041
Bm1_06790	hypothetical protein		-0.884645	-0.884645	0.689593	0.147083	0.581929	-0.182405	-0.0740503	0.0740503	1.57424	0.627876
Bm1_06795	hypothetical protein		-0.13667	-0.13667	-0.13667	0.13667	0.432881	0.29856	0.381517	-0.13667	0.569551	0.755175
Bm1_06805	hypothetical protein		0.660189	-0.726444	0.128842	0.584798	-0.404094	-0.128842	0.368618	-0.42157	1.38663	0.349428
Bm1_06810	Cuticle collagen dpy-7 precursor	P3	-4.49171	-4.49171	2.15511	-1.33179	0.336693	2.86559	0.199195	-0.199195	7.3573	5.16981e-116
Bm1_06825	hypothetical protein		1.18896	0.346696	-0.00962018	0.000845777	-0.181692	-0.0665372	0.3507	-0.000845777	1.37065	0.647264
Bm1_06830	ABC transporter transmembrane region family protein		-0.135067	-0.135067	-0.135067	0.139244	0.135067	0.344494	0.264154	-0.135067	0.479561	0.874377
Bm1_06845	hypothetical protein		0	0	0	1.16984	0	0.179817	0	0.407761	1.16984	0.155331
Bm1_06850	reverse transcriptase		0	0	0	0.274185	0	0.174358	0	0	0.274185	0.872489
Bm1_06855	hypothetical protein		-0.0752317	0.990401	-0.0752317	0.628371	0.198246	0.0752317	-0.0752317	-0.0752317	1.06563	0.425384
Bm1_06870	Pao retrotransposon peptidase family protein		0	0	0	0	0	0.153507	0.228115	0	0.228115	0.910332
Bm1_06875	hypothetical protein		-1.76809	0.650041	0.153465	-0.0458926	-0.218117	0.41223	-0.328448	0.0458926	2.41814	0.643968
Bm1_06880	polyadenylate-binding protein 4	P15	0.961981	0.418077	0.31554	0.0147411	-0.0147411	-0.625662	-0.979142	-0.857864	1.94112	3.63749e-12
Bm1_06885	hypothetical protein		0	0	0	0	0.216274	0.588367	0.433437	0	0.588367	0.600458
Bm1_06890	env-like protein		0	0	0	0	0	0.173881	0.197417	0.402311	0.402311	0.855344
Bm1_06895	hypothetical protein		0	0	0	0	0.4095	0	0	0.390953	0.4095	0.525761
Bm1_06900	Probable tyrosine-protein kinase kin-31		0	0	0	0	0.61138	0.154162	0	0	0.61138	0.457248
Bm1_06905	Zinc finger, ZZ type family protein		-1.71955	-0.496777	0.270006	0.0679517	0.0760049	0.0550818	-0.0550818	-0.138499	1.98956	0.0977027
Bm1_06910	DNA polymerase delta catalytic subunit		-0.487723	0.00472108	0.385719	0.381532	0.150467	-0.0799229	-0.0892488	-0.00472108	0.873442	0.240518
Bm1_06915	cDNA sequence BC018371	P7	-2.47077	-2.47077	-1.10115	-0.351533	0.351533	0.767772	1.15715	0.784412	3.62792	1.72001e-07
Bm1_06920	hypothetical protein		0	0	0	0.274185	0	0	0	0.390633	0.390633	0.706413
Bm1_06925	F26F3.2 protein		1.6982	0.257764	-0.0942565	0.0942565	-0.09985	-0.23443	0.100833	-0.0962919	1.93263	0.787198
Bm1_06930	Zinc finger protein 183 homolog		-1.01682	-0.779724	0.316756	-0.0872936	0.0872936	0.39057	-0.161608	0.26241	1.40739	0.461776
Bm1_06935	HAD-superfamily hydrolase, subfamily IA, variant 1 containing protein		-1.08005	-0.109223	0.39708	0.15298	0.0531729	-0.223073	0.0691155	-0.0531729	1.47713	0.477257
Bm1_06940	Oligosaccharyl transferase STT3 subunit homolog	P15	0.17151	-0.0256473	0.387733	0.0256473	0.224379	-0.0779739	-0.506841	-0.685981	1.07371	0.00275689
Bm1_06945	Streptomyces cyclase/dehydrase family protein		-0.502846	0.325462	0.265985	0.0257777	-0.348353	-0.0257777	0.347795	-0.150612	0.850641	0.793277
Bm1_06950	Double-stranded RNA binding motif family protein		-1.37295	0.289069	0.409683	0.111172	-0.0362127	0.0362127	-0.281599	-0.284939	1.78263	0.0414506
Bm1_06955	hypothetical protein		-2.65633	0.44924	0.294479	-0.342281	0.0647807	0.0616779	-0.186857	-0.0616779	3.10557	0.7271
Bm1_06960	hypothetical protein		1.27636	0.883511	-0.436008	-0.0558956	0.164147	-0.0669174	-0.00684055	0.00684055	1.71237	0.775414
Bm1_06965	hypothetical protein	P7	-2.14965	-2.14965	-0.566812	0.280019	-0.280019	0.480982	1.47814	1.2854	3.62779	3.97698e-08
Bm1_06970	Hypothetical 28.7 kDa protein in RNR3-ARC15 intergenic region, putative		-1.18762	-1.18762	0.986143	-0.0149091	0.372473	0.0149091	-0.481324	0.343051	2.17376	0.190346
Bm1_06980	hypothetical protein	P2	-2.5329	-0.866434	-0.00477511	0.00477511	1.29068	2.00279	0.197397	-0.478255	4.53569	4.43525e-18
Bm1_06985	rRNA methyltransferase		0.28928	-0.0844465	0.124169	0.0851743	0.0017997	-0.0017997	-0.614111	-0.443421	0.903391	0.0382108
Bm1_06990	Myotubularin-related family protein		-0.478885	-0.0486916	0.384844	0.0486916	0.288911	0.0998027	-0.241375	-0.509239	0.894083	0.0352071
Bm1_06995	hypothetical protein		1.80225	0.900755	0.414139	0.291671	-0.499967	-0.620475	-0.291671	-0.338579	2.42273	0.168469
Bm1_07000	Serine protease Z688.6 precursor		0.0787139	-0.858581	-0.378178	-0.0787139	0.279103	0.272356	0.282267	-0.37576	1.14085	0.193696
Bm1_07005	Serine protease Z688.6 precursor	P6	-0.916143	-0.124753	-0.358999	0.124753	0.387614	0.245298	0.535876	-0.535403	1.45202	0.000604011
Bm1_07010	Serine carboxypeptidase S28 family protein	P8	-4.29951	-4.29951	-1.76832	0.745169	1.71506	1.59796	1.01003	-0.745169	6.01457	2.26825e-38
Bm1_07015	hypothetical protein		-1.81539	0.549556	0.134347	0.0261067	-0.0261067	0.116307	-0.090388	-0.218752	2.36495	0.466047
Bm1_07020	membrane-bound transcription factor protease		-2.02913	0.0960196	-0.0413773	0.0413773	0.0788364	0.36312	-0.247407	-0.494172	2.39225	0.0373999
Bm1_07025	CCR4-NOT transcription complex subunit 7		-1.38826	-0.211659	-0.174217	0.0191798	0.127932	0.242319	-0.0191798	0.168084	1.63058	0.304339
Bm1_07030	60S ribosomal protein L12	P16	0.208264	0.662268	0.314268	-0.122747	0.122747	-0.34156	-1.27498	-1.60615	2.26842	7.2994e-31
Bm1_07035	alkyldihydroxyacetonephosphate synthase	P5	-0.779645	0.186134	0.138297	-0.00323427	0.00323427	0.227793	-0.157571	-1.59525	1.82304	3.77261e-08
Bm1_07040	YjeF-related protein, C-terminus containing protein		0.234414	-0.0699929	0.143344	0.0430823	-0.0430823	0.144066	-0.0845419	-0.206001	0.440415	0.945144
Bm1_07045	hypothetical protein		-0.859146	0.204871	0.530323	0.31508	0.444855	-0.204871	-0.662745	-0.468742	1.38947	0.406775
Bm1_07050	hypothetical protein		-0.690959	-0.690959	0.152821	-0.186819	1.03669	0.597003	-0.0114604	0.0114604	1.72765	0.178188
Bm1_07055	CDP-alcohol phosphatidyltransferase family protein	P6	-1.30023	-0.0277123	-0.13638	-0.121285	0.0277123	0.272062	0.826746	0.555317	2.12698	2.45381e-07
Bm1_07060	Protein kinase domain containing protein	P6	-1.24417	1.00415	0.126254	-0.126254	-0.652898	-0.190407	1.54624	1.20091	2.79041	1.53708e-13
Bm1_07070	hypothetical protein	P4	-1.12029	-0.0593249	0.242663	-0.418277	-0.875352	1.56921	0.396445	0.0593249	2.6895	2.45019e-06
Bm1_07075	hypothetical protein	P3	-0.56998	-0.56998	0.564419	-0.296085	-0.140189	1.429	1.09798	0.140189	1.99897	0.000786214
Bm1_07080	CENP-B N-terminal DNA-binding domain containing protein	P10	-0.448848	-0.448848	0.0288383	-0.448848	-0.0288383	1.96369	2.56098	1.09214	3.00982	6.03442e-10
Bm1_07090	hypothetical protein		0	0	0	0.273376	0.26248	0	0	0	0.273376	0.80651
Bm1_07095	Zinc finger, C2H2 type family protein		-0.0763036	-0.0763036	0.417465	0.954659	0.49194	0.0763036	-0.0763036	-0.0763036	1.03096	0.206705
Bm1_07100	hypothetical protein		2.45926	0	0	0.273376	0	0	0	0	2.45926	0.244889
Bm1_07105	FG-GAP repeat family protein		-0.680594	0.379534	0.904086	0.0212872	0.18837	-0.0212872	-0.130219	-0.288074	1.58468	0.719928
Bm1_07110	cullin homolog 3		-0.0060041	0.590119	0.096821	0.182137	-0.0672585	0.0060041	-0.0827204	-0.0861535	0.676272	0.264312
Bm1_07115	ankyrin repeat domain protein 28	P9	-0.909039	-0.47792	-0.283303	0.0759516	-0.0759516	0.289989	0.823393	0.959062	1.8681	4.15346e-10
Bm1_07120	hypothetical protein		-1.96155	0.130377	-0.215875	-0.239153	-0.130377	0.574059	1.00096	1.0914	3.05295	0.0157346
Bm1_07125	hypothetical protein		-1.00286	-1.00286	-1.00286	0.169817	0.473784	0.682599	-0.169817	0.172453	1.68546	0.0963602
Bm1_07130	hypothetical protein		-2.52932	0.905114	-0.00437141	0.0591447	-0.199328	0.00437141	0.00750748	-0.471435	3.43444	0.532429
Bm1_07135	hypothetical protein	P1	-2.35767	-1.64908	-0.740769	-0.208566	0.270747	0.807401	0.471184	0.208566	3.16507	8.31468e-20
Bm1_07140	hypothetical protein	P2	-0.737585	-0.888748	-0.539136	-0.291945	0.291945	0.690227	0.437036	0.443376	1.57898	8.07999e-07
Bm1_07145	hypothetical protein		-1.33579	0.332507	0.246924	-0.458607	-0.07766	0.0641471	-0.0641471	0.194824	1.6683	0.91757
Bm1_07150	hypothetical protein		-0.327926	0.329601	0.444514	0.241885	-0.161899	-0.183794	-0.505617	0.161899	0.950131	0.487787
Bm1_07155	hypothetical protein		0	0	0	0.273409	0	0	0.832254	0.94875	0.94875	0.0768389
Bm1_07160	Hsp20/alpha crystallin family protein	P5	-2.85314	0.250866	-0.147931	-0.368395	-0.0441274	0.0441274	0.460152	1.64662	4.49976	1.93428e-06
Bm1_07165	ATPase, AAA family protein	P5	-0.191218	0.773875	0.28376	0.331965	0.136807	-0.472204	-0.756057	-0.136807	1.52993	3.66547e-06
Bm1_07170	cytokine inducible SH2-containing protein 5		-0.851302	0.118515	-0.0740421	0.0740421	-0.0928346	-0.132007	0.230061	0.321153	1.17246	0.618557
Bm1_07180	Sly1 protein homolog		-0.743468	-0.0397615	0.0146384	-0.0146384	-0.0629582	0.303169	0.288565	0.0834199	1.04664	0.263292
Bm1_07185	programmed cell death protein 6		-1.8995	0.57559	0.411175	0.308943	-0.0794583	-0.0727198	-0.0636621	0.0636621	2.47509	0.158593
Bm1_07190	hypothetical protein		-1.026	-0.0426873	0.378049	0.191994	0.22696	-0.103682	-0.0773182	0.0426873	1.40405	0.804127
Bm1_07195	K+ channel tetramerisation domain containing protein		0.267896	-0.301655	-0.0761716	-0.32066	-0.190662	0.0761716	0.241598	0.666281	0.986941	0.12878
Bm1_07200	Alpha-adaptin homolog		-0.775774	0.0445301	0.0254539	-0.11015	0.0397851	0.0243303	-0.0243303	-0.428465	0.820305	0.353538
Bm1_07205	Hypothetical 34.8 kDa protein C28H8.5 in chromosome III, putative	P9	-1.42639	-1.42639	-0.946595	0.946595	-1.42639	2.08129	5.09652	3.53057	6.52291	3.91471e-73
Bm1_07210	Casein kinase I C03C10.2 in chromosome III		0	0	1.12713	0.273475	0	0.171904	0	0	1.12713	0.196569
Bm1_07215	hypothetical protein		0	1.0639	0.49226	0	0	0	0	0	1.0639	0.35646
Bm1_07235	Dual specificity phosphatase, catalytic domain containing protein		-0.385337	-0.385337	0.439806	0.119319	-0.119319	-0.385337	0.267479	1.16032	1.54565	0.0899519
Bm1_07245	hypothetical protein		-3.09923	0.179059	-0.0140056	0.250521	0.243365	0.0140056	-0.021706	-0.579636	3.34975	0.426266
Bm1_07250	TPR Domain containing protein	P11	-0.339145	-0.211523	-0.378934	-0.0261076	0.0261076	0.250963	0.751936	0.713601	1.13087	0.000313729
Bm1_07255	hypothetical protein, conserved		-0.0813282	0.156686	0.331493	0.100513	-0.121746	0.0813282	-0.440714	-0.65905	0.990543	0.0137418
Bm1_07260	hypothetical protein		-2.42061	-0.000294622	-0.656948	-0.106403	0.000294622	0.222341	0.183952	0.77677	3.19738	0.278728
Bm1_07265	hypothetical protein		0	0	0	0	0	0.174358	0	0.390633	0.390633	0.806126
Bm1_07270	hypothetical protein		0	0	0	0	0	0.153879	0.36954	0	0.36954	0.753616
Bm1_07275	Core-2/I-Branching enzyme family protein	P10	0	0	0	0	0	1.13165	1.88826	2.04343	2.04343	0.000161141
Bm1_07280	hypothetical protein		0	0	0	0	0	0.311245	0	0	0.311245	0.742578
Bm1_07285	DNA polymerase epsilon p17 subunit		-2.7553	0.157061	0.287671	-0.0699102	0.0699102	-0.114275	0.310277	-0.40504	3.06558	0.645672
Bm1_07290	Prion-like-	P9	-0.896068	-0.896068	-0.420199	1.8331	-0.284034	0.85626	2.11637	0.284034	3.01243	1.82767e-05
Bm1_07295	MGC80520 protein	P13	-0.174936	-2.6286	-0.300716	0.628513	0.174936	0.312347	1.24449	-0.803957	3.87309	0.000170095
Bm1_07300	hypothetical protein		-2.01178	-0.346813	0.684754	0.107797	-0.0228445	-0.343062	0.0228445	0.503024	2.69653	0.508937
Bm1_07305	KH domain containing protein		0.291618	0.351401	0.227738	-0.319799	0.158266	-0.158266	-0.521496	-0.624704	0.976104	0.000169169
Bm1_07310	hypothetical protein	P10	-1.2234	-0.161353	-0.738688	-0.52137	0.161353	2.24689	3.81947	3.35941	5.04287	5.16669e-41
Bm1_07315	hypothetical protein		-0.739059	0.239941	0.0198404	0.0992613	-0.0198404	-0.0801216	-0.243943	0.111067	0.979	0.971924
Bm1_07320	Zinc finger, C2H2 type family protein		-0.968797	0.0932457	0.161278	-0.69491	-0.199306	-0.0932457	0.192059	0.714327	1.68312	0.383955
Bm1_07340	zinc metalloproteinase toh-2 precursor	P9	-2.78171	-1.11523	-1.21223	1.27572	-2.18533	1.11523	2.51039	1.15435	5.2921	1.33229e-23
Bm1_07345	hypothetical protein	P7	-0.510809	-0.692622	-0.172056	0.0175471	-0.0175471	0.265902	0.760537	0.82467	1.51729	6.53794e-11
Bm1_07350	DNA translocase ftsK	P9	0.375584	0.643199	-0.375584	6.49898	1.52682	-1.46487	-3.07152	-2.76394	9.5705	0
Bm1_07355	Proline-rich protein MP-2 precursor		0	0	0	0.5038	0	0	0	0	0.5038	0.531625
Bm1_07360	NADH-ubiquinone oxidoreductase 30 kDa subunit, mitochondrial precursor	P1	-3.01383	-0.439935	-0.236461	0.0836823	-0.0836823	0.220549	0.768208	0.76465	3.78204	2.85567e-11
Bm1_07365	TLD family protein		-3.55252	0.143127	-0.000490921	-0.00936899	-0.0587442	0.297977	0.225589	0.000490921	3.85049	0.516765
Bm1_07370	Heat shock factor binding protein 1		-0.467048	0.273247	0.00652575	-0.00652575	0.135981	0.105763	-0.0960801	-0.228086	0.740294	0.834612
Bm1_07375	exosome complex exonuclease RRP40		-0.0413582	0.109609	-0.0721193	0.0630438	-0.0510847	0.0368279	0.0621734	-0.0368279	0.181729	0.998325
Bm1_07380	Leucine Rich Repeat family protein		-0.00937494	-0.362386	0.00937494	0.00950735	-0.177467	-0.117166	0.0362995	0.0502969	0.412683	0.904493
Bm1_07385	hypothetical protein		0.602272	-0.62585	-0.209822	-0.403852	-0.0104069	0.0104069	0.139535	0.0823392	1.22812	0.927128
Bm1_07390	Nuclear movement protein	P16	-0.114907	0.358432	0.492172	0.13075	0.114907	-0.287251	-0.964937	-1.05213	1.5443	1.76875e-09
Bm1_07395	60S ribosomal protein L39	P16	-0.185928	1.24646	0.983678	0.0509598	1.10689	-0.0509598	-0.0608903	-0.858181	2.10464	2.91114e-08
Bm1_07400	adaptin or adaptin-related protein protein 8		0.847931	-0.376277	0.278739	0.0550149	0.150776	-0.0550149	-0.356546	-0.393912	1.24184	0.0956197
Bm1_07405	WD40-like Beta Propeller Repeat family protein	P8	-1.20631	-0.950041	-1.23984	-0.515636	0.898076	1.49796	1.35113	0.515636	2.7378	3.92142e-31
Bm1_07410	hypothetical protein		-0.115479	-0.115479	-0.115479	-0.115479	0.115479	0.848	0.589303	1.06741	1.18289	0.0800513
Bm1_07415	hypothetical protein		0	0	0	0	0	0	0.197868	0.967847	0.967847	0.183824
Bm1_07420	aconitate hydratase, mitochondrial	P1	-3.54629	-0.751502	-0.454726	0.0519234	-0.0519234	0.708727	1.63282	1.64506	5.19134	3.25116e-54
Bm1_07425	Immunoglobulin I-set domain containing protein		-0.137136	-0.137136	-0.137136	0.137136	0.264779	0.275944	0.605176	-0.137136	0.742313	0.711942
Bm1_07430	Fasciclin domain containing protein		-3.62517	0.395202	0.383611	0.262002	0.0107835	-0.140688	-0.0107835	-0.363838	4.02037	0.220835
Bm1_07435	hypothetical protein		-0.246675	-0.246675	-0.246675	0.0275233	-0.0275233	0.596321	0.490987	0.143743	0.842996	0.612698
Bm1_07445	hypothetical protein		0	0	0	0.274185	0.219689	0	0	0	0.274185	0.811669
Bm1_07450	hypothetical protein		0	0	0	0	0	0.153507	0.228115	0	0.228115	0.910332
Bm1_07475	hypothetical protein		-0.275098	0.788591	-0.275098	-0.275098	-0.275098	0.275098	0.714676	0.673448	1.06369	0.0902164
Bm1_07480	KH domain containing protein		0.136213	-0.100206	0.295141	-0.211042	0.122321	0.100206	-0.473325	-0.279946	0.768467	0.0283236
Bm1_07485	hypothetical protein		-1.82435	-1.82435	0.361151	-0.0138423	0.244877	-0.32382	0.0138423	0.225099	2.1855	0.448458
Bm1_07490	hypothetical protein		2.30878	-0.262484	-0.0242028	0.384072	-0.304078	0.0242028	-0.218586	0.117845	2.61286	0.278069
Bm1_07495	hypothetical protein		-1.76516	0.32668	-0.0101007	0.664467	-0.103554	0.0101007	0.571958	-0.0820095	2.42963	0.497063
Bm1_07500	hypothetical protein		-1.91209	0.504987	0.168532	-0.0998797	0.207238	-0.273763	0.0916003	-0.0916003	2.41708	0.910687
Bm1_07505	RE15519p		-1.10808	0.558395	-0.264376	0.0648351	-0.0648351	0.0954554	0.320691	-0.147444	1.66648	0.939539
Bm1_07510	mitochondria processing peptidase subunit beta	P16	-0.152628	0.781845	0.0122554	-0.0122554	0.181891	0.133393	-0.399305	-0.846238	1.62808	4.05096e-08
Bm1_07515	hypothetical protein		1.72231	0.948956	0.107172	-0.717586	-0.150772	-0.149638	-0.107172	0.227625	2.43989	0.320333
Bm1_07525	hypothetical protein		-2.49859	0.605443	0.633803	0.729045	0.0834811	-0.376043	-0.0834811	-0.142259	3.22763	0.173131
Bm1_07530	Hypothetical 32.4 kDa protein in TAF40-ERV25 intergenic region, putative		0.570408	0.538701	-0.300989	0.012726	0.0694003	-0.012726	-0.282446	-1.17693	1.74734	0.466758
Bm1_07535	tubulin beta chain		-1.82641	-0.159921	0.709685	0.425264	0.490997	-0.090329	0.090329	-0.143962	2.53609	0.677796
Bm1_07540	hypothetical protein		-0.770841	0.252946	0.114501	0.0606997	0.10325	-0.0813331	-0.0606997	-0.2642	1.02379	0.363715
Bm1_07545	ARP2/3 complex 16 kDa subunit		0.719268	0.0730578	0.189905	0.0176378	-0.0176378	-0.024127	-0.405939	-0.422172	1.14144	0.39315
Bm1_07550	Kelch motif family protein		-0.176572	-0.00518864	-0.0568504	-0.0359989	0.00518864	0.164132	0.167892	0.350754	0.527326	0.551865
Bm1_07555	Large-conductance calcium-activated potassium channel Slo-1 (KCNMA) alpha subunit. C. elegans slo-1 ortholog	P13	-0.948	-1.73203	-0.870906	-0.343515	0.343515	0.954484	1.46142	1.15271	3.19344	9.31446e-16
Bm1_07560	Large-conductance calcium-activated potassium channel Slo-1 (KCNMA) alpha subunit. C. elegans slo-1 ortholog	P6	-2.23597	-1.40909	-1.46853	-0.505891	0.505891	1.18781	1.79386	1.43791	4.02983	7.11104e-51
Bm1_07565	geranylgeranyl pyrophosphate synthetase		0.872075	0.190526	-0.155083	0.259233	-0.0992116	0.0992116	-0.176773	-0.125544	1.04885	0.797296
Bm1_07570	Prp18 domain containing protein		-0.444515	0.525758	0.120993	-0.160929	-0.0336833	-0.0473197	0.0336833	0.422391	0.970274	0.454401
Bm1_07575	chromosome 10 open reading frame 42		0.264743	-0.0125602	0.0125602	0.17699	-0.193871	-0.160804	-0.225201	0.0839393	0.489944	0.90717
Bm1_07580	hypothetical protein	P1	-3.37427	-1.7078	-0.852651	0.167393	-0.167393	0.274445	0.455917	0.721912	4.09619	0.000977704
Bm1_07605	hypothetical protein		0.712795	0.143716	0.302412	0.0568404	-0.147749	-0.128687	-0.0568404	-0.462054	1.17485	0.84719
Bm1_07610	Protein C14orf111 homolog		0.38005	0.0694	0.232637	-0.0343618	0.0343618	-0.123248	-0.31557	-0.644673	1.02472	0.169814
Bm1_07615	Peroxin-3 family protein		-1.24844	0.319807	0.0739914	0.0368211	-0.0368211	-0.0773325	0.239976	-0.141549	1.56825	0.845656
Bm1_07620	eukaryotic translation initiation factor 4E-1	P16	0.240001	0.628682	0.115441	-0.0441602	0.0441602	-0.0807052	-0.493791	-0.787395	1.41608	0.00674892
Bm1_07625	hypothetical protein		-1.50458	0.160921	0.0679265	-0.203984	-0.0284104	0.0968784	0.0284104	-0.543459	1.6655	0.929507
Bm1_07630	Protein kinase domain containing protein		0	0	0	0	0.41869	0.566166	0	0.392846	0.566166	0.419193
Bm1_07635	GM16138p		-4.72901	-0.0311631	0.298347	-0.118793	0.0679936	-0.221474	0.49568	0.0311631	5.22469	0.0235155
Bm1_07640	Heat shock 70 kDa protein C precursor	P2	-1.12841	0.0715623	0.463666	-0.0715623	0.129983	0.188717	-1.13856	-1.26981	1.73348	1.71238e-12
Bm1_07645	heat shock 70 kDa protein C precursor	P2	-0.694638	-0.0354097	0.553285	0.0354097	0.204765	0.21899	-0.789059	-0.838163	1.39145	4.18316e-07
Bm1_07655	hypothetical protein		-0.566347	0.497454	0.278151	-0.566347	0.0447188	-0.235895	-0.0447188	0.130356	1.0638	0.660479
Bm1_07660	hypothetical protein		-0.80615	-0.80615	0.312852	1.16614	-0.0432138	-0.482918	0.0432138	0.15976	1.97229	0.0439852
Bm1_07665	Cytochrome oxidase assembly protein		-2.20017	-0.63022	0.203178	-0.0278089	0.4578	0.320751	-0.0113499	0.0113499	2.65797	0.0248695
Bm1_07670	cytochrome C-type heme lyase		-0.630481	0.0291785	0.161271	-0.0174727	0.0148334	0.144868	-0.106952	-0.0148334	0.791752	0.907037
Bm1_07675	Tubulin beta-1 chain	P5	-0.330768	1.07758	0.943547	0.458183	0.330768	-0.339927	-1.05233	-1.27081	2.34839	1.56635e-18
Bm1_07680	EB module family protein	P1	-4.50158	-0.581246	-0.0371336	0.578027	-0.158494	0.322302	0.849703	0.0371336	5.35128	4.2052e-06
Bm1_07685	DJ-1 family protein		-0.75478	0.0969835	0.154912	-0.263571	0.242921	0.17189	-0.161496	-0.0969835	0.997701	0.586494
Bm1_07690	mitochondrial 2-oxoglutarate/malate carrier protein	P16	0.19406	0.668488	0.222511	0.118351	-0.118351	-0.685427	-0.926329	-0.856843	1.59482	1.08162e-06
Bm1_07695	hypothetical protein		1.89869	-0.292594	0.670011	0.292587	0.165063	-0.165063	-0.563457	-0.593113	2.49181	0.154594
Bm1_07700	RWD domain containing protein		-0.407057	0.644345	0.138083	0.377946	-0.0510466	0.0510466	-0.173896	-0.128102	1.0514	0.484497
Bm1_07705	hypothetical protein		0.163127	0.989235	-0.0925886	0.0842533	0.300129	-0.108586	-0.0842533	-0.470712	1.45995	0.578475
Bm1_07710	Probable molybdopterin binding domain containing protein		0.149979	-0.229767	-0.0456789	-0.324016	-0.258175	0.18224	0.0456789	0.674905	0.998921	0.085997
Bm1_07715	hypothetical protein		1.03123	-0.0794833	0.56645	-0.0465819	0.0465819	-0.350526	-0.11527	0.161351	1.38176	0.250914
Bm1_07730	Eukaryotic aspartyl protease family protein		-0.136822	-0.136822	-0.136822	0.136822	0.920138	0.42796	-0.136822	0.261447	1.05696	0.156236
Bm1_07735	hypothetical protein	P10	-0.258994	-0.258994	-0.258994	0.0149017	-0.0149017	0.622829	1.27437	1.55816	1.81716	0.0026494
Bm1_07740	hypothetical protein	P11	-0.642856	-0.642856	-0.163202	-0.139343	0.139343	0.730643	2.42463	3.12172	3.76458	1.49045e-16
Bm1_07745	Helix-loop-helix DNA-binding domain containing protein		-0.452988	-0.452988	0.0264487	0.579152	-0.0264487	0.320866	-0.070419	0.507625	1.03214	0.753616
Bm1_07750	metalloprotease		-1.23458	-0.174191	-0.756824	0.659899	0.0606257	0.620486	0.216033	-0.0606257	1.89447	0.46501
Bm1_07755	hypothetical protein		0.827862	0.792263	0.187797	-0.183657	0.00665367	-0.00665367	-0.0491522	-0.158343	1.01152	0.587092
Bm1_07760	hypothetical protein		-0.291472	-0.167827	-0.0993575	0.0426127	0.165645	-0.0426127	0.637879	0.661854	0.953326	0.238058
Bm1_07765	hypothetical protein		-1.00965	0.65314	0.364329	-0.505159	0.194304	-0.194304	0.387882	-0.292135	1.66279	0.70088
Bm1_07770	hypothetical protein	P11	-0.371523	-0.0324189	-0.191411	0.0324189	-0.288664	0.154531	0.945303	1.06771	1.43923	3.63618e-15
Bm1_07775	enhancer of rudimentary homolog		-0.718504	0.398592	0.264938	0.184324	0.240296	-0.184324	-0.83055	-0.506958	1.22914	0.302559
Bm1_07780	immunogenic protein 3	P10	-1.31979	-0.257891	-1.31979	-0.815839	0.257891	1.57546	3.69508	4.32256	5.64235	1.98487e-69
Bm1_07790	hypothetical protein	P16	0.322597	0.632669	-0.0502601	-0.408598	0.0502601	0.0778434	-0.730469	-0.94532	1.57799	0.00176099
Bm1_07795	hypothetical protein		0.684622	-0.0550835	0.336983	-0.42969	0.233924	-0.132165	0.0550835	-0.569938	1.25456	0.460302
Bm1_07805	hypothetical protein		-0.211011	0.852101	-0.211011	-0.211011	0.401423	0.211011	0.339143	-0.211011	1.06311	0.415838
Bm1_07810	F-box domain containing protein		-2.36459	0.054624	-0.175359	0.454642	-0.261561	-0.0258221	0.0258221	0.23097	2.81923	0.68762
Bm1_07815	hypothetical protein		-1.73696	-0.676003	0.175457	0.514833	0.0250436	-0.0250436	0.585276	-0.201929	2.32223	0.545062
Bm1_07820	hypothetical protein		-1.15987	-1.15987	-1.15987	0.139503	-0.139503	0.43512	0.436679	0.512098	1.67196	0.131109
Bm1_07825	hypothetical protein		0.482891	-0.298137	-0.0535169	0.154717	-0.673939	0.0535169	0.659016	-0.281885	1.33295	0.330293
Bm1_07830	SMC family, C-terminal domain containing protein		-0.997215	0.026191	0.263706	0.0441821	-0.0202796	-0.0200129	-0.379439	0.0200129	1.26092	0.516563
Bm1_07835	pyridoxal kinase		-2.17541	-0.0836256	-0.602069	0.254377	0.0152574	0.30519	0.225779	-0.0152574	2.4806	0.696917
Bm1_07840	Thioredoxin family protein		0.317223	0.0259349	0.00587192	-0.204911	-0.0487225	0.223953	-0.00587192	-0.0962933	0.522134	0.872489
Bm1_07845	hypothetical protein	P9	-1.84394	-1.84394	-1.00642	0.129206	-0.129206	0.44735	1.93558	2.01212	3.85605	8.90874e-12
Bm1_07850	ubiquitin-conjugating enzyme E2-binding protein 1		-1.98387	0.000756848	0.262117	0.198838	-0.0396397	0.0237777	-0.000756848	-0.507148	2.24599	0.177834
Bm1_07855	Conserved hypothetical ATP binding protein		-1.06173	0.600613	0.220524	0.223169	0.178653	-0.178653	-0.555033	-0.911711	1.66234	0.0260265
Bm1_07860	hypothetical protein	P6	-2.57564	0.532991	-0.151729	-0.0389472	-0.274054	0.0389472	1.16972	0.809952	3.74536	0.00255492
Bm1_07865	Zona pellucida-like domain containing protein	P11	-1.35693	-0.296042	-0.518949	-0.324802	0.296042	1.694	6.01376	5.11705	7.3707	3.3102e-103
Bm1_07870	jmjC domain containing protein	P13	1.34945	-0.0373299	0.0373299	-0.39585	0.490159	-1.09814	-0.253113	0.433121	2.44759	0.00600854
Bm1_07875	hypothetical protein		-0.770052	0.896437	0.812933	-0.496065	-0.114241	0.377973	0.0628449	-0.0628449	1.66649	0.405751
Bm1_07880	T-cell receptor beta chain ANA 11		-0.10046	-0.10046	0.376631	-0.10046	0.124703	0.336693	0.10046	-0.10046	0.477091	0.778583
Bm1_07885	SD09147p	P15	0.428559	0.0520303	0.24614	-0.0160658	0.0160658	-0.511755	-0.577644	-1.13587	1.56443	0.00248893
Bm1_07890	hypothetical protein		-0.341402	0.180464	0.0108302	0.279026	-0.294198	0.0357149	-0.0108302	-0.0623717	0.620427	0.692091
Bm1_07895	MGC84563 protein		-1.32662	-1.32662	-0.196911	0.301287	0.326073	0.0896883	-0.0465845	0.0465845	1.6527	0.729235
Bm1_07900	hypothetical protein		-0.0785096	0.384667	0.568992	-0.153011	0.462717	-0.5325	-0.662733	0.0785096	1.23173	0.105435
Bm1_07905	metallophosphoesterase 1		-0.274997	-0.254311	-0.149258	-0.102433	0.102433	0.108254	0.578262	0.708851	0.983849	0.000337391
Bm1_07910	hypothetical protein		-1.01094	0.0495436	0.108912	0.289544	-0.0495436	0.71037	-0.320172	-0.611322	1.7213	0.348399
Bm1_07915	hypothetical protein		-2.27404	-0.182966	0.816818	-0.22649	-0.0773634	0.395137	0.342862	0.0773634	3.09086	0.303064
Bm1_07920	WGR domain containing protein		-0.0888463	-0.032877	0.46316	0.390876	0.366051	0.032877	-0.0592147	-0.164152	0.627312	0.0762829
Bm1_07925	peroxisomal membrane anchor protein	P13	1.92704	0.0248009	0.275344	-0.0248009	0.200764	-0.20803	-0.682224	-1.25127	3.17831	0.00284009
Bm1_07930	hypothetical protein		-0.57362	-0.110261	-0.0381348	-0.129862	0.0381348	0.164533	0.114201	0.130465	0.738153	0.887577
Bm1_07935	hypothetical protein		1.51833	-0.735927	0.123789	-0.497721	-0.0219096	0.318615	-0.272733	0.0219096	2.25426	0.553257
Bm1_07940	oxidoreductase, short chain dehydrogenase/reductase family protein		-0.536231	-0.0219163	0.291554	0.28537	0.132554	0.0219163	-0.174539	-0.546702	0.838257	0.185571
Bm1_07950	hypothetical protein		-0.611369	-0.376879	-0.183041	-0.632931	0.183041	0.437269	0.61504	0.242668	1.24797	0.131392
Bm1_07955	Fibronectin type III domain containing protein	P1	-1.78299	-0.924178	-0.204771	-0.0476804	0.0841831	0.341629	0.356002	0.0476804	2.139	1.10366e-05
Bm1_07960	hypothetical protein		0.859659	1.03523	0.751437	-0.119402	0.118169	-0.134876	-0.295297	-0.118169	1.33052	0.136147
Bm1_07965	trafficking protein particle complex subunit 4		-3.35433	0.846967	-0.0150027	-0.411215	0.0150027	0.284792	-0.157672	0.0792189	4.2013	0.127444
Bm1_07985	hypothetical protein		0	0	0	0.273411	0	0.311071	0	0.39119	0.39119	0.730229
Bm1_07990	Neurotransmitter-gated ion-channel ligand binding domain containing protein		-2.32771	-2.32771	-0.746953	-0.0762986	0.0762986	0.396241	0.516655	0.420215	2.84436	0.0287685
Bm1_07995	hypothetical protein		0.374526	0.172007	0.133115	-0.178965	-0.18764	-0.0209127	0.0209127	-0.0836306	0.562166	0.839547
Bm1_08000	hypothetical protein		-0.610767	0.00808024	0.110406	-0.0572668	0.0291645	0.0522392	-0.166911	-0.00808024	0.721174	0.92772
Bm1_08005	hypothetical protein		0	0	0	0	0.211982	0	0.440516	0.690873	0.690873	0.50615
Bm1_08010	hypothetical protein	P12	0	0	0	0	0	0	0.408415	2.59712	2.59712	5.99506e-10
Bm1_08015	Twik (KCNK-like) family of potassium channels, alpha subunit 24	P11	-1.27536	-0.213185	0.655852	-0.399137	0.213185	-0.3928	3.98755	5.35726	6.63262	5.57376e-86
Bm1_08020	hypothetical protein		-1.00216	0.662363	0.757509	0.0303962	0.60263	-0.0303962	-0.169276	-0.608631	1.75966	0.37643
Bm1_08025	F-box domain containing protein		0	0	0	0	0.261223	0.153879	0.197417	0	0.261223	0.930848
Bm1_08035	Hypothetical 36.0 kDa protein C45G9.5 in chromosome III, putative		-0.855177	0.408738	-0.355089	-0.0183214	-0.00733913	0.00733913	0.186696	0.0635718	1.26391	0.702457
Bm1_08040	hypothetical protein	P10	0.189437	-0.966617	-0.705145	-0.189437	-1.09209	0.458597	2.59067	1.34604	3.68276	2.61941e-30
Bm1_08055	Hypothetical UPF0103 protein C37C3.8 in chromosome V	P9	0.00140134	-0.522197	-0.625639	0.295665	-0.174004	-0.00140134	0.762312	0.746372	1.38795	0.000210698
Bm1_08060	PHD-finger family protein		0.676124	0.525981	-0.21115	-0.00555457	-0.0960324	0.00555457	-0.0671743	0.439417	0.887274	0.81404
Bm1_08065	hypothetical protein		-0.640346	0.421919	0.941314	-0.136548	-0.0412406	0.0412406	0.538209	-0.245997	1.58166	0.501122
Bm1_08070	DnaJ domain containing protein		0.0941304	0.0976161	-0.120785	-0.00536102	-0.121749	-0.267125	0.152334	0.00536102	0.419459	0.715657
Bm1_08075	Paxneb protein		1.08565	0.244221	-0.00156989	0.198786	0.00156989	-0.10521	-0.090587	-0.191448	1.2771	0.388329
Bm1_08080	hypothetical protein		-0.246831	0.389559	0.257047	0.291397	0.14875	-0.14875	-0.174763	-0.522523	0.912082	0.149938
Bm1_08085	Glutaredoxin family protein		-0.538544	-0.466614	0.0719937	0.461879	-0.063001	0.0970029	0.063001	-0.067819	1.00042	0.453821
Bm1_08090	Zinc finger, C2H2 type family protein		0.0391569	0.00455261	-0.374204	-0.0867081	0.0334378	0.169891	-0.0298412	-0.00455261	0.544095	0.806156
Bm1_08095	Homeobox protein unc-4-like		-0.556595	-0.556595	-0.556595	0.743774	0.497052	0.00278738	-0.00278738	0.150428	1.30037	0.296371
Bm1_08100	lysine decarboxylase		-0.337303	-0.337303	-0.337303	-0.0638391	0.244356	0.61019	0.235248	0.0638391	0.947493	0.609245
Bm1_08105	keratinocyte associated protein 2		-0.238044	0.954965	0.559053	-0.172461	0.125098	0.126683	-0.125098	-0.61543	1.57039	0.0477726
Bm1_08110	Leucine Rich Repeat family protein		-1.34658	0.317712	0.141191	0.0903242	0.0426516	-0.0426516	-0.114031	-0.363611	1.66429	0.756228
Bm1_08115	hypothetical protein		-2.3581	0.0611193	-0.299176	-0.0452103	0.0112202	-0.0112202	0.0118013	0.154751	2.51285	0.945862
Bm1_08120	WW domain containing protein		-0.0301582	-0.0629073	0.257085	0.0092269	-0.0632925	-0.0092269	0.100201	0.0948389	0.320377	0.994683
Bm1_08125	Conserved oligomeric Golgi complex component 8		-4.18255	-0.612404	0.0750298	0.255429	-0.0750298	0.178177	0.0822215	-0.482016	4.43798	0.0708211
Bm1_08130	Myotubularin-related family protein	P6	-0.131118	0.267085	-0.396021	-0.555284	-0.338457	0.131118	0.34663	0.514223	1.06951	1.66426e-05
Bm1_08135	cell division protein kinase 10	P9	0.0200158	-0.298151	-1.12366	-0.0200158	-0.329091	0.189358	0.903241	0.892313	2.0269	1.98064e-10
Bm1_08145	Zinc finger, C2H2 type family protein		1.84869	2.08594	-0.119412	-0.0959779	-0.157835	-0.290242	0.0959779	0.576977	2.37618	0.0155175
Bm1_08150	NAD-dependent malic enzyme, mitochondrial precursor	P15	-0.146279	0.146279	1.0528	0.298426	0.184994	-0.80491	-2.66918	-3.36455	4.41735	4.40124e-101
Bm1_08155	Zinc finger, C2H2 type family protein		0	1.67049	0	0	0	0	0.22728	0	1.67049	0.128664
Bm1_08160	hypothetical protein	P6	-1.20138	-0.621206	-0.60909	-0.0323876	0.0323876	0.114124	0.412621	0.189522	1.614	0.000198885
Bm1_08165	hypothetical protein		-0.998268	-0.310965	-0.0830915	0.0445894	-0.0445894	0.0928257	0.433323	0.381435	1.43159	0.0577499
Bm1_08170	hypothetical protein		-0.108391	-0.108391	0.363639	-0.108391	0.108391	0.180782	0.122677	-0.108391	0.472029	0.877262
Bm1_08175	hypothetical protein	P5	-3.09476	0.182297	1.12267	0.131573	0.498349	-0.256118	-0.131573	-1.03891	4.21743	3.70874e-05
Bm1_08180	hypothetical protein		-1.04884	-1.04884	0.323627	-0.0169254	-0.00375181	0.00375181	0.309239	0.76648	1.81532	0.581996
Bm1_08185	Cation transporter family protein	P8	-2.02874	-2.02874	-1.18484	-0.133114	0.687039	0.958539	0.78358	0.133114	2.98728	0.00173778
Bm1_08190	hypothetical protein		-1.01214	-1.01214	0.115777	0.406432	-0.115777	0.322692	-0.144502	0.16151	1.41857	0.775414
Bm1_08195	hypothetical protein		1.08706	-0.670072	0.268927	-0.173055	0.0266763	-0.58851	-0.0266763	0.344965	1.75713	0.305963
Bm1_08200	hypothetical protein		-0.211367	0.252526	-0.0401298	0.0248705	-0.0248705	-0.10462	0.0963434	0.445964	0.657332	0.962269
Bm1_08205	Probable ATP-dependent RNA helicase p47 homolog	P16	0.645831	0.79594	0.245442	0.0197948	-0.0197948	-0.519907	-1.30389	-1.53416	2.3301	1.72422e-38
Bm1_08210	glutamate dehydrogenase, mitochondrial precursor, putative	P16	-0.055777	0.201688	0.327672	0.348868	0.055777	-0.406961	-1.48534	-2.09884	2.44771	2.79486e-35
Bm1_08215	hypothetical protein		-0.136738	-0.136738	-0.136738	0.136738	0.278561	0.299978	-0.136738	0.255438	0.436716	0.731812
Bm1_08220	hypothetical protein		0.833926	0.198655	0.0307401	-0.0307401	0.0634263	-0.128266	-0.646299	-0.649205	1.48313	0.0166913
Bm1_08225	hypothetical protein		-0.632493	-0.123671	0.253276	-0.204441	0.10414	0.0172615	0.160868	-0.0172615	0.885769	0.901285
Bm1_08230	hypothetical protein		0	0	0	0	0.611168	0	0	0	0.611168	0.317234
Bm1_08235	hypothetical protein		0	0	0	0	0.450656	0.525356	0	0	0.525356	0.418751
Bm1_08245	hypothetical protein	P6	-3.01991	-1.35344	-1.65055	-0.117519	0.191256	0.117519	1.48493	1.16004	4.50484	1.97533e-13
Bm1_08250	CG18437-PA	P13	0.212912	-2.23547	-1.10111	-0.0482011	-0.00769948	0.00769948	1.45534	1.24274	3.69081	2.97056e-08
Bm1_08255	hypothetical protein		1.81844	0.235226	-0.675737	-0.102945	0.32283	-0.0104886	0.0104886	-0.203004	2.49418	0.088195
Bm1_08260	hypothetical protein		-0.454086	0.604401	1.16829	0.0497144	0.155568	-0.30221	-0.454086	-0.0497144	1.62237	0.127478
Bm1_08265	RNA pseudouridylate synthase family protein		0.613592	0.189965	0.280921	0.245051	-0.490122	-0.529022	-0.189965	-0.466957	1.14261	0.129252
Bm1_08270	FLJ31455 protein		1.40278	0.771922	0.154751	-0.196421	0.086726	-0.108795	-0.22803	-0.086726	1.63081	0.806424
Bm1_08275	hypothetical protein		-0.154795	-0.154795	-0.154795	-0.154795	0.287332	0.154795	0.79629	0.243219	0.951085	0.283572
Bm1_08280	B-box type zinc-finger protein ncl-1	P6	-3.41413	-0.137026	-0.127209	-0.155986	0.127209	0.690239	1.93543	1.35779	5.34957	1.04233e-17
Bm1_08285	Aminopeptidase P, N-terminal domain containing protein		-3.88235	-0.312471	-0.147064	0.0445428	0.189521	0.28058	0.705419	-0.0445428	4.58777	0.0104548
Bm1_08330	LOC129285 protein		-1.33815	-0.275558	0.428853	-0.038023	0.443019	-0.0849204	0.282986	0.038023	1.78117	0.902762
Bm1_08335	Myb-like DNA-binding domain containing protein		-1.19411	1.222	0.566577	-0.160665	0.0527264	-0.0398009	0.0314255	-0.0314255	2.41611	0.747467
Bm1_08340	hypothetical protein	P5	-2.28604	-0.75233	-0.388256	0.15564	0.162266	0.349155	0.105663	-0.105663	2.6352	8.55158e-09
Bm1_08345	hypothetical protein		-0.357604	-0.0881887	0.278496	0.153701	0.238542	0.0881887	-0.291813	-0.348636	0.636099	0.298653
Bm1_08350	DEAD/DEAH box helicase family protein		-1.06025	-0.181236	0.427455	0.379479	0.075523	-0.075523	-0.145147	0.450376	1.51063	0.0166668
Bm1_08355	annexin	P1	-3.47976	-1.06056	0.337659	-0.100863	-0.461224	0.100863	0.142338	0.924126	4.40388	0.000511905
Bm1_08360	nuclear DNA-binding protein C1D		-2.41496	0.688299	0.55823	0.173431	-0.173431	-0.499033	-0.372057	0.370429	3.10326	0.350256
Bm1_08370	hypothetical protein		1.01091	-0.374873	-0.0643483	0.749093	0.0643483	-0.473806	0.434691	-0.0739937	1.48472	0.287929
Bm1_08375	cuticlin 1 precursor		-1.53123	0.558978	0.402226	0.657119	0.862108	-0.402226	-0.445235	-0.571797	2.39334	0.0786142
Bm1_08380	hypothetical protein		-2.03266	1.24377	0.396261	0.0859799	-0.116567	0.660406	-0.0859799	-0.338465	3.27643	0.182728
Bm1_08385	Hypothetical 17.1 kDa protein in PUR5 3'region		0	1.05927	0	0	0	0.153507	0	0	1.05927	0.572772
Bm1_08390	hypothetical protein		-0.299388	-0.299388	-0.299388	-0.0253413	0.146026	0.0253413	0.408469	0.10095	0.707857	0.846751
Bm1_08395	hypothetical protein		-0.582047	0.60548	0.351954	0.285946	0.0837139	-0.139079	-0.360409	-0.0837139	1.18753	0.0262859
Bm1_08400	hypothetical protein	P7	-0.374842	-1.1145	-0.102906	0.102906	-0.23893	0.643124	1.47947	1.34836	2.59397	6.84134e-20
Bm1_08405	catechol-O-methyltransferase domain containing 1		0	0	0	0	0	0	0.19682	0.390633	0.390633	0.760756
Bm1_08410	O-methyltransferase family protein		0	0	0	0.273411	0	0	0.424817	0.402047	0.424817	0.624374
Bm1_08415	chromosome 14 open reading frame 169		-2.37191	0.3137	-0.61768	0.11302	-0.159975	-0.11302	0.162182	0.449836	2.82175	0.60118
Bm1_08420	kinesin light chain protein 2, isoform a		0.479977	0.277506	0.606157	0.155307	-0.155307	-0.877668	-0.896909	-0.877285	1.50307	0.0615732
Bm1_08425	hypothetical protein		0.452393	-0.328931	0.196463	-0.578467	0.178182	-0.589631	-0.178182	0.444468	1.04202	0.366718
Bm1_08430	hypothetical protein		-0.577691	-0.115896	0.066282	-0.164515	0.113093	0.159564	-0.066282	0.0836998	0.737255	0.986644
Bm1_08435	Neuronal acetylcholine receptor protein, alpha-2 chain precursor		-0.260964	-0.260964	-0.260964	0.0129919	-0.0129919	0.294892	0.894598	1.10524	1.3662	0.0984254
Bm1_08440	Calcium binding EGF domain containing protein		-0.899989	-0.899989	-0.420104	0.131886	-0.131886	0.65266	0.85828	0.469928	1.75827	0.181973
Bm1_08450	hypothetical protein	P8	-1.84574	-1.84574	-1.84574	-0.427625	0.427625	1.24141	1.18753	1.44268	3.28842	1.31565e-07
Bm1_08455	Protein kinase domain containing protein		0	0	0	0.874851	0	0.804959	0.362878	0	0.874851	0.228402
Bm1_08465	hypothetical protein		-0.438894	0.621666	0.0395103	-0.438894	0.195827	0.234135	-0.21928	-0.0395103	1.06056	0.602564
Bm1_08470	hypothetical protein		0.0312028	-0.188155	-0.325313	0.0375645	0.275625	-0.347387	-0.0312028	0.669394	1.01678	0.0384022
Bm1_08475	hypothetical protein	P13	-0.114428	-2.56242	0.46259	-0.132841	-0.834604	0.114428	0.53741	0.748805	3.31122	0.00245263
Bm1_08480	von Willebrand factor type A domain containing protein	P4	0.17221	-1.2179	-1.14061	-0.653187	-0.17221	4.82231	3.16614	1.89791	6.04021	6.41349e-83
Bm1_08485	MGC53303 protein		-1.05612	0.34899	0.236984	-0.00700992	0.0891669	0.00700992	-0.150365	-0.147423	1.40511	0.401575
Bm1_08495	hypothetical protein		-1.31178	-1.31178	0.0608733	-0.279669	0.0501071	0.0985596	-0.0501071	0.0516636	1.41034	0.833293
Bm1_08500	tRNA-Pro		0	0	0	0.273396	0.447828	0	0	0	0.447828	0.593535
Bm1_08505	hypothetical protein	P4	-0.350071	0.71376	0.477931	0.152988	-0.350071	1.31308	-0.152988	-0.350071	1.66315	0.00492676
Bm1_08510	SD01790p	P4	-0.559542	-0.559542	0.284384	0.473035	-0.115088	2.2356	0.115088	-0.159922	2.79514	2.27799e-07
Bm1_08515	hypothetical protein		-0.345777	-0.345777	0.127343	0.157212	-0.127343	1.43338	0.597324	-0.345777	1.77916	0.030106
Bm1_08520	eukaryotic translation initiation factor 3 subunit 8	P16	0.355528	0.53479	0.122395	0.0105292	-0.0105292	-0.160081	-0.538727	-0.80629	1.34108	2.37349e-08
Bm1_08525	hypothetical protein		-0.137434	-0.573306	0.0678608	0.53034	0.245252	-0.0678608	-0.0853144	0.393532	1.10365	0.409624
Bm1_08530	Surf2		-0.27863	0.181903	0.28989	-0.0926804	0.0926804	0.0999259	-0.232606	-0.472293	0.762183	0.860387
Bm1_08535	phenylalanyl (f) trna synthetase protein 1, isoform b	P16	0.336064	0.710181	0.261311	0.0341791	-0.0341791	-0.327881	-0.300319	-0.697492	1.40767	9.79408e-06
Bm1_08540	Rhomboid family protein		-0.0882648	-0.0491186	0.0491186	-0.0620716	0.257489	0.176099	0.151743	-0.427482	0.684971	0.199667
Bm1_08545	Mediator protein 4	P16	0.00787386	0.683164	0.423995	-0.00787386	0.146621	-0.214484	-0.711085	-0.452635	1.39425	0.000208918
Bm1_08550	hypothetical protein		-0.222442	-0.222442	-0.222442	-0.222442	0.222442	0.355791	0.708747	0.957462	1.1799	0.171487
Bm1_08555	Kelch motif family protein		-2.91338	0.364253	-0.0444566	0.344538	-0.0570889	0.0444566	-0.0697832	0.184811	3.27764	0.720227
Bm1_08560	hypothetical protein		0.223627	-0.558974	1.05453	0.414345	0.428172	-0.363729	-0.223627	-1.04833	2.10286	0.0148915
Bm1_08565	Zinc finger, C2H2 type family protein	P16	0.065687	0.896552	0.528576	-0.371976	0.268432	-0.065687	-0.570169	-0.136445	1.46672	0.00177192
Bm1_08570	histone-fold protein CHRAC subunit	P16	0.138431	0.59953	0.106684	-0.123143	0.757186	-0.106684	-0.64904	-1.34608	2.10327	0.00463634
Bm1_08575	Beta-ketoacyl synthase, N-terminal domain containing protein		-1.81763	-0.149898	-0.0484797	0.771372	0.0484797	0.597727	0.149503	-0.289372	2.589	0.397351
Bm1_08580	AMP-binding enzyme family protein		0.0590904	-1.32724	-0.62149	0.701884	-0.387236	0.0427659	0.156679	-0.0427659	2.02912	0.242441
Bm1_08585	LD16137p		0.533358	0.605118	-0.0302031	0.350761	0.0302031	-0.0828439	-0.246012	-0.333474	0.938592	0.583814
Bm1_08590	hypothetical protein		-2.32772	0.77972	-0.282542	0.154609	-0.367781	-0.0159244	0.0159244	0.273345	3.10744	0.760031
Bm1_08595	hypothetical protein		-0.440638	1.22583	0.0437842	0.0631599	0.000998038	-0.000998038	-0.0463886	-0.0455425	1.66647	0.849566
Bm1_08600	hypothetical protein		-0.52336	-0.52336	0.606431	-0.0195628	0.533161	0.352147	0.0195628	-0.52336	1.12979	0.400784
Bm1_08605	nuclear DNA-binding protein C1D		1.8658	0.640273	-0.0777986	0.176954	-0.174629	-0.67617	-1.06679	0.0777986	2.9326	0.0435027
Bm1_08610	hypothetical protein		-2.14638	-1.08387	-1.01762	0.392264	0.27895	-0.023598	0.426119	0.023598	2.5725	0.245651
Bm1_08615	eukaryotic translation initiation factor 3 subunit 4	P16	0.63598	0.768136	0.481216	0.135816	-0.135816	-0.298443	-0.980753	-0.435338	1.74889	4.51803e-11
Bm1_08620	ADP-ribosylation factor-like protein 2		-1.02843	-0.2	0.0685476	0.116747	0.0080624	0.22907	-0.0080624	-0.133849	1.2575	0.929021
Bm1_08625	hypothetical protein	P12	0.418598	-0.00116248	-0.0929914	-0.206269	-0.33399	0.00116248	0.00159436	1.3473	1.68129	1.86577e-05
Bm1_08630	PAS domain containing protein		-1.01192	0.0485158	0.125199	0.405158	-0.113842	-0.46944	-0.0485158	0.523448	1.53537	0.670292
Bm1_08635	hypothetical protein	P6	-0.926155	0.0426873	-0.0972913	0.0282637	-0.0351466	-0.0282637	0.634814	0.565298	1.56097	0.000509413
Bm1_08640	Phospholipase d protein 1	P6	-2.19985	-0.729526	-0.607594	0.134033	-0.134033	0.489944	1.2559	1.08725	3.45575	1.14257e-18
Bm1_08645	hypothetical protein		0	0	0	0	0	0	0.228115	0.390633	0.390633	0.757872
Bm1_08650	Variant SH3 domain containing protein		-1.5998	1.0869	-0.0280945	0.0280945	0.299117	-0.319332	-0.422233	0.0862514	2.68671	0.452413
Bm1_08655	CG11202-PA		-0.43893	-0.43893	0.0397684	-0.164958	0.498963	0.224307	0.523421	-0.0397684	0.962351	0.745637
Bm1_08665	Periodic tryptophan protein 2 homolog	P15	0.640139	0.38552	0.19921	-0.062602	0.062602	-0.399616	-0.90747	-1.14164	1.78178	2.44752e-13
Bm1_08670	hypothetical protein	P15	1.02889	0.454765	0.198919	-0.0110086	0.0110086	-0.13507	-0.541523	-0.456997	1.57041	0.000113385
Bm1_08675	homeobox domain containing protein		0.639965	-0.148488	-0.969553	-0.00283073	0.24534	0.205859	-0.172677	0.00283073	1.60952	0.742541
Bm1_08690	hypothetical protein		-1.12727	-0.0666921	-0.291534	0.595677	-0.0853903	0.570977	0.0666921	1.03877	2.16604	0.392579
Bm1_08695	trehalose-6-phosphate synthase		0.282962	-0.0820429	0.222396	0.0382958	0.165824	-0.0382958	-0.278376	-0.415346	0.698308	0.121513
Bm1_08700	Membrane-bound transcription factor site-1 protease precursor, putative		-0.117791	-0.398832	0.0421886	0.354292	0.00163784	0.0797032	-0.00163784	-0.297451	0.753124	0.737387
Bm1_08705	DNA topoisomerase II, alpha isozyme	P16	-0.112696	0.229128	0.577048	0.350264	0.112696	-0.488455	-1.25617	-1.4177	1.99475	9.95957e-21
Bm1_08710	hypothetical protein		0.553386	-0.236034	0.704974	0.286221	-0.0253354	0.0253354	-0.29164	-0.0802473	0.996614	0.809598
Bm1_08720	ABC transporter N-terminus family protein	P11	-1.36606	-1.36606	-0.243402	-1.09211	0.315645	0.243402	3.74995	4.33736	5.70341	2.29282e-52
Bm1_08725	SWIM zinc finger family protein		0.13152	-0.564216	-0.120426	-0.0182739	0.0182739	-0.0771104	0.0384693	0.13536	0.699576	0.72399
Bm1_08730	hypothetical protein		0.999522	0.0347548	-0.357643	-0.759223	0.550998	0.366488	-0.278962	-0.0347548	1.75875	0.167396
Bm1_08735	hypothetical protein		-0.933734	-0.0471773	-0.136453	-0.280916	0.0684596	0.0471773	0.135485	0.547716	1.48145	0.305931
Bm1_08740	tRNA (5-methylaminomethyl-2-thiouridylate)-methyltransferase, putative		0.178089	0.0685419	-0.255909	0.138747	-0.256898	-0.0443199	0.0443199	-0.119733	0.434987	0.920455
Bm1_08745	hypothetical protein		-0.402453	-0.402453	0.963225	-0.402453	0.769796	0.046338	0.00874761	-0.00874761	1.36568	0.105543
Bm1_08750	hypothetical protein		0	0	0.487362	0	0.444441	0	0.395856	0	0.487362	0.484435
Bm1_08755	splicing factor, CC1-like family protein		0.490336	0.399117	0.276864	-0.0238246	0.0238246	-0.280719	-0.496018	-0.405454	0.986354	8.29788e-05
Bm1_08760	ShTK domain containing protein		-0.592274	-0.592274	-0.111472	0.707943	0.1874	-0.282904	0.111472	0.584997	1.30022	0.358586
Bm1_08770	hypothetical protein		0	0	0	0.273376	0	0.174358	0	0	0.273376	0.872529
Bm1_08775	Myb-like DNA-binding domain containing protein		-0.0738202	0.0336993	0.13358	-0.133861	-0.0336993	0.177198	0.0774811	-0.0552803	0.31106	0.838059
Bm1_08780	Glycosyl hydrolases family 38 protein	P4	0.0602374	-0.296225	-1.01627	-1.35644	-0.0602374	2.33856	1.95309	1.30609	3.69499	5.4585e-29
Bm1_08785	Helix-loop-helix DNA-binding domain containing protein	P5	-3.70209	0.580644	-0.147685	-0.29339	-0.0016582	0.0016582	0.112574	1.24589	4.94798	1.51992e-05
Bm1_08790	hypothetical protein	P11	-0.608064	-0.00413984	0.108817	0.00413984	-0.554435	-0.591505	0.935174	1.33875	1.94681	7.52837e-10
Bm1_08795	hypothetical protein	P16	0.042378	0.401719	0.167867	-0.042378	0.465231	-0.0671883	-0.0988057	-1.36468	1.82991	0.00386826
Bm1_08800	Rab GDP dissociation inhibitor alpha	P5	-1.18179	0.129655	0.151507	0.0381649	0.128963	-0.0381649	-0.247316	-0.496526	1.3333	0.000186076
Bm1_08805	ubiquinone biosynthesis O-methyltransferase family protein		-0.906914	-0.0122725	-0.139188	0.202066	0.117725	0.0122725	0.110848	-0.0615079	1.10898	0.666655
Bm1_08810	zgc:86903		0.136638	0.411561	-0.0772489	0.176785	-0.0553921	0.0553921	-0.216427	-0.305898	0.717459	0.520593
Bm1_08815	DnaJ domain containing protein		-0.313629	0.188645	-0.667778	-0.0807251	0.0608614	0.0372063	-0.0372063	0.302434	0.970212	0.589652
Bm1_08820	Zinc finger protein 207		0.226548	0.601383	-0.407153	0.0233278	0.102144	-0.229739	-0.0233278	-0.236713	1.00854	0.0606233
Bm1_08825	hypothetical protein		0.340726	-0.384852	-0.0386929	-0.0364569	-0.205	0.0364569	0.223764	0.0852652	0.725578	0.742004
Bm1_08830	Amidohydrolase family protein		-0.768363	-0.250889	0.0620195	0.148733	-0.0147525	0.133061	0.0147525	-0.20112	0.917097	0.334895
Bm1_08835	Fatty acid elongation protein 3	P16	0.518418	0.621253	0.0426593	-0.0426593	0.0777404	-0.278852	-0.809961	-1.42795	2.0492	6.33544e-12
Bm1_08840	cyclophilin-type peptidyl-prolyl cis-trans isomerase-12, Bmcyp-12	P15	0.449049	0.183019	-0.00686766	0.0627737	-0.00089001	0.00089001	-0.771073	-1.20092	1.64997	0.00340163
Bm1_08845	SH2 domain containing protein		-0.23815	-0.528443	-0.0517139	0.15648	0.1559	0.0807145	0.0382038	-0.0382038	0.684923	0.742004
Bm1_08850	Adenosine kinase-like		-0.608806	-0.608806	-0.608806	0.425242	0.279712	0.0623209	-0.0623209	0.0829263	1.03405	0.757332
Bm1_08855	hypothetical protein		-1.19812	0.115964	-0.0492058	-0.156335	0.0492058	0.12329	0.143851	-0.101983	1.34197	0.615492
Bm1_08860	MOZ/SAS family protein		-0.0223388	0.194153	-0.0669198	0.0558723	0.0104782	-0.0104782	0.0284089	-0.154038	0.348191	0.996172
Bm1_08865	hypothetical protein	P1	-2.38661	-0.719199	0.135199	-0.135199	-0.267335	0.938101	2.47864	2.40924	4.86525	7.33568e-23
Bm1_08870	hypothetical protein	P6	-2.67147	-0.251433	-1.30263	-0.484422	0.251433	1.40376	2.52245	2.49674	5.19392	1.22443e-30
Bm1_08875	hypothetical protein		0.396722	0.470128	-0.00527199	0.217042	0.00527199	-0.25406	-0.652324	-0.580974	1.12245	0.160366
Bm1_08880	riboflavin kinase		-1.20441	0.159303	0.0289156	-0.0590973	0.374177	0.100391	-0.192222	-0.0289156	1.57859	0.732441
Bm1_08885	Pre-B cell enhancing factor precursor		-1.319	0.0198368	0.221211	0.171059	-0.0127815	0.0127815	-0.103284	-0.322839	1.54021	0.168917
Bm1_08890	hypothetical protein		-0.0672083	-0.27636	0.400181	-0.155373	0.0672083	0.223445	0.144637	-0.0874604	0.676541	0.90016
Bm1_08895	hypothetical protein		-2.25659	1.55487	0.452307	0.475542	-0.306083	-0.186216	-0.277528	0.186216	3.81146	0.0179985
Bm1_08900	RNA binding protein		1.35253	0.174676	0.127424	0.0200679	-0.222876	-0.0584867	-0.0200679	-0.204295	1.57541	0.532836
Bm1_08905	hypothetical protein		-1.51551	0.401293	-0.515922	-0.0967018	-0.123902	0.0967018	0.48826	0.491408	2.00692	0.117336
Bm1_08910	hypothetical protein	P1	-2.89573	-0.772021	0.16269	0.0371775	-0.17568	-0.0371775	0.242024	0.163068	3.13776	0.00652637
Bm1_08915	hypothetical protein	P5	-5.71194	-0.134356	0.212315	0.628151	0.331849	-0.293478	0.134356	-1.20115	6.34009	2.2754e-17
Bm1_08920	hypothetical protein	P1	-2.09702	-0.039011	-0.409089	-0.209609	0.039011	1.17282	0.673683	0.353035	3.26984	4.83716e-11
Bm1_08925	Hypothetical zinc finger protein B0310.2 in chromosome X, putative		-0.0401369	0.784963	-0.0642704	0.192672	-0.292282	-0.458236	0.3678	0.0401369	1.2432	0.493278
Bm1_08930	hypothetical protein		-0.0971091	-0.0971091	0.397889	0.407603	0.118995	-0.0971091	0.0971091	-0.0971091	0.504712	0.702497
Bm1_08935	hypothetical protein		-3.49769	-0.066261	-0.479622	-0.17736	0.312042	0.399789	0.245636	0.066261	3.89748	0.2168
Bm1_08940	hypothetical protein		0.056362	0.116622	0.26596	-0.056362	0.0740553	-0.0823842	-0.621041	-0.481422	0.887001	0.0819979
Bm1_08945	transcriptional regulator, Sir2 family protein		-4.35819	0.150444	0.0295813	-0.16106	-0.0295813	-0.246091	0.159072	0.152208	4.51726	0.15864
Bm1_08950	hypothetical protein		-2.91222	-0.00319427	-0.200267	0.801808	0.444662	-0.00289424	0.00289424	0.19862	3.71403	0.136177
Bm1_08955	Hypothetical UPF0131 protein CG2811	P1	-2.6326	-0.9668	-0.00932074	0.0990084	0.00932074	0.926571	0.466136	-0.283121	3.55917	0.00806974
Bm1_08960	hypothetical protein		0.0132055	0.621182	-0.0132055	0.188754	-0.125894	-0.251363	-0.226569	0.0502668	0.872546	0.807982
Bm1_08965	hypothetical protein		-1.84526	-0.17878	0.454232	0.12741	-0.033967	0.033967	-0.498686	0.0895044	2.29949	0.775414
Bm1_08970	Helix-loop-helix DNA-binding domain containing protein		-0.130232	-1.51719	0.130232	-0.46011	0.303666	0.689148	0.235114	-0.422651	2.20634	0.0297968
Bm1_08975	von Willebrand Factor		-2.2541	0.166596	0.0504873	-0.0682451	-0.0504873	1.03453	0.665141	-0.571399	3.28862	0.0312142
Bm1_08980	Homeobox domain containing protein		-0.530767	0.531347	1.05018	-0.0269697	0.250463	0.0269697	-0.325159	-0.136023	1.58095	0.358897
Bm1_08985	basement membrane proteoglycan precursor	P10	-3.10374	-2.04256	-1.52375	-0.790297	0.790297	1.64248	3.12575	2.07536	6.22949	5.73487e-52
Bm1_08990	hypothetical protein		-0.113195	-0.113195	0.361735	-0.113195	-0.113195	0.179677	0.113195	0.854562	0.967757	0.37582
Bm1_09005	Homeobox protein lin-39		-2.24329	-1.18111	0.290236	-0.942877	0.14179	-0.100866	0.299885	0.100866	2.54318	0.169122
Bm1_09010	ATP dependent DNA ligase C terminal region family protein		0.443696	-0.207997	0.219341	-0.23122	0.0584936	0.127632	-0.0584936	-0.232043	0.675739	0.743974
Bm1_09015	Williams-Beuren syndrome chromosome region 16 protein		-0.068556	0.189641	-0.160508	0.286244	0.0537298	0.0596747	-0.0537298	-0.446831	0.733075	0.798336
Bm1_09020	LMBR1-like conserved region family protein		0.864522	0.686176	0.0175526	-0.325117	-0.594507	-0.484181	0.0639141	-0.0175526	1.45903	0.104586
Bm1_09025	hypothetical protein	P8	-3.15181	-3.15181	-1.57009	1.63407	1.59828	0.283456	0.41071	-0.283456	4.78588	4.78686e-15
Bm1_09030	IQ calmodulin-binding motif family protein	P5	-0.684241	0.284084	0.966859	0.77382	0.312671	-0.284084	-0.626695	-0.898004	1.86486	1.73601e-08
Bm1_09035	hypothetical protein	P5	-2.6327	1.1752	0.970067	0.884	0.516863	-0.516863	-1.1171	-0.578066	3.80791	1.76202e-06
Bm1_09040	RE40412p	P6	-3.54839	-1.1292	-0.837424	0.210578	-0.207367	0.207367	0.58631	0.982424	4.53082	1.25999e-06
Bm1_09045	fructose-bisphosphate aldolase 2		0.430573	0.0131496	-0.0131496	0.295746	-0.182249	-0.232258	-0.0167276	0.475367	0.707626	0.574701
Bm1_09050	ubiquitin	P16	0.520158	0.868895	0.138424	-0.138424	0.209079	-0.41775	-0.976752	-1.31981	2.18871	4.43371e-24
Bm1_09055	ShTK domain containing protein	P4	-0.216235	-0.216235	-0.216235	-0.216235	0.216235	3.5047	1.95088	4.96122	5.17746	6.1255e-55
Bm1_09060	hypothetical protein		0	0	0	0	0.261223	0.330134	0	0	0.330134	0.762837
Bm1_09070	UBASH3A protein homolog		-0.0952536	-0.0952536	-0.0952536	-0.0952536	0.600775	0.388691	0.0952536	0.291528	0.696029	0.661856
Bm1_09075	60S ribosomal protein L8	P15	0.971497	0.451995	0.335902	-0.210568	0.210568	-0.302317	-1.62926	-1.82013	2.79163	5.39379e-26
Bm1_09080	hypothetical protein		-1.67565	-1.67565	0.0785954	0.961651	-0.314714	-0.00882176	0.00882176	0.0105182	2.6373	0.0667846
Bm1_09085	transporter	P12	0.16636	0.99543	0.0691233	-0.362909	-0.0775038	-0.0691233	-0.0977512	1.89228	2.25519	4.0842e-31
Bm1_09090	Zinc finger, C2H2 type family protein		-0.088492	-0.088492	-0.088492	0.416269	0.181263	0.088492	0.104914	-0.088492	0.504761	0.893568
Bm1_09100	hypothetical protein		0.745804	-0.895316	0.228987	0.0262081	-0.205205	-0.0227595	0.0227595	-0.12893	1.64112	0.904609
Bm1_09105	hypothetical protein		-0.351534	0.0329188	0.263034	-0.284067	-0.0329188	-0.254702	0.186647	0.114823	0.614568	0.819573
Bm1_09110	Transmembrane GTPase fzo-1		-0.623219	0.127717	0.0438022	0.171564	-0.0125992	-0.0969868	-0.0557858	0.0125992	0.794783	0.778815
Bm1_09115	MGC80188 protein		-0.436544	-0.436544	0.0396704	0.439932	0.29468	0.144789	-0.0396704	-0.0444216	0.876476	0.923361
Bm1_09120	hypothetical protein		0.147821	0.265131	-0.367732	-0.00565667	0.282296	0.00565667	-0.275187	-0.360356	0.650028	0.718583
Bm1_09125	hypothetical protein	P6	-4.82122	-1.00684	-1.08263	-0.528663	0.528663	1.63292	3.251	3.23638	8.07222	3.24992e-84
Bm1_09130	hypothetical protein		-0.155283	-0.155283	-0.155283	0.347994	0.430679	0.155283	-0.155283	1.53277	1.68806	0.0207834
Bm1_09135	hypothetical protein	P6	-4.191	-0.271052	0.0103824	-0.0103824	0.038285	-0.304163	1.55633	2.19133	6.38233	8.80195e-34
Bm1_09150	guanylate kinase		-0.502485	-0.275793	-0.0513365	-0.134229	0.0513365	0.298836	0.294395	0.239703	0.801322	0.251223
Bm1_09155	ribosomal RNA adenine dimethylase family protein		-3.96781	-0.0472546	0.108956	0.127537	0.140041	0.0438124	-0.0438124	-0.532527	4.10785	0.171882
Bm1_09160	hypothetical protein		-0.192225	0.305586	0.17748	-0.249165	0.332724	0.249541	-0.17748	-0.772465	1.10519	0.190914
Bm1_09165	Glycine-rich cell wall structural protein 2 precursor		-0.463039	-0.463039	0.0173801	0.954566	-0.463039	-0.0173801	0.496512	0.244021	1.41761	0.0627032
Bm1_09170	Ubiquitin carboxyl-terminal hydrolase, family 1 protein		-0.681984	0.00613122	0.0173462	-0.492981	-0.00613122	0.0491252	0.361785	-0.0826957	1.04377	0.109754
Bm1_09175	hypothetical protein	P10	-0.749251	-0.749251	-0.749251	-0.245452	0.245452	1.23518	2.53428	2.14449	3.28353	2.36059e-09
Bm1_09180	hypothetical protein		-0.886018	0.178418	0.471613	0.922015	-0.436552	-0.298419	0.456096	-0.178418	1.80803	0.400982
Bm1_09185	DEAD/DEAH box helicase family protein		0.0770609	0.808181	0.293523	0.30738	-0.0770609	-0.129489	-0.31401	-1.10672	1.9149	0.0273415
Bm1_09190	Nucleolar complex-associated protein		1.00302	0.314135	-0.0671131	0.0671131	0.431284	-0.22425	-0.706008	-0.506547	1.70903	0.0541287
Bm1_09195	Thyroglobulin type-1 repeat family protein	P3	-1.93227	-1.93227	3.02362	0.114553	-0.212094	2.90149	0.317883	-0.114553	4.95589	3.28866e-40
Bm1_09200	hypothetical protein	P12	-1.32322	0.34328	-0.834869	0.723401	-0.259665	-0.281217	0.259665	2.4293	3.75252	1.42048e-07
Bm1_09205	DAK1 domain containing protein		-2.97281	-0.0602663	0.371109	-0.383721	-0.438411	0.0602663	0.307015	0.280908	3.34392	0.192576
Bm1_09210	Partner of SLD five, PSF1 family protein	P16	-0.0845105	0.895755	0.802438	0.100732	0.0845105	-0.471505	-0.614182	-1.17252	2.06828	0.00441266
Bm1_09215	hypothetical protein	P11	-0.433777	-0.433777	0.0419644	0.441577	0.178178	-0.433777	1.27437	-0.0419644	1.70815	0.00986753
Bm1_09225	HIT zinc finger family protein	P14	1.02273	0.797196	0.34564	0.16914	-0.16914	-0.730753	-1.16475	-0.934216	2.18748	2.41541e-10
Bm1_09230	S-adenosylmethionine synthetase	P16	0.699323	0.657774	0.284542	-0.0359981	0.0359981	-0.47381	-1.02228	-1.1933	1.89262	1.12522e-16
Bm1_09235	30S ribosomal protein S12		1.31123	-0.0179796	0.0179796	-0.2908	0.083493	0.0352948	-0.347753	-0.674541	1.98577	0.443094
Bm1_09240	jmjC domain containing protein		0.199093	-1.02403	-0.240327	0.0113766	-0.0113766	0.106651	-0.0452188	0.042748	1.22313	0.880412
Bm1_09245	RH49308p		-0.707223	0.0164173	0.147386	-0.101953	-0.0164173	-0.196737	0.685814	0.779065	1.48629	0.0314788
Bm1_09260	ShTK domain containing protein	P11	-1.11714	-0.0545048	0.239859	0.0545048	-0.672771	-0.433261	3.23637	5.18223	6.29937	1.39645e-54
Bm1_09265	Dehydrogenases, short chain protein 30		-1.4541	-0.797972	-0.00469018	0.00469018	0.0758748	0.108648	-0.0481365	0.057676	1.56275	0.725513
Bm1_09270	Skp1 related (ubiquitin ligase complex component) protein 18-like		0.149833	0.30974	0.118423	0.0200646	-0.0326822	-0.187996	-0.0200646	-0.261325	0.571065	0.876249
Bm1_09275	hypothetical protein		-0.23839	-0.23839	-0.23839	0.0355989	0.525909	0.0717976	-0.0355989	0.155165	0.764298	0.760756
Bm1_09280	Pex2 / Pex12 amino terminal region family protein	P15	0.886523	0.628245	0.358752	0.124426	-0.124426	-0.560596	-0.848215	-0.723041	1.73474	0.000923977
Bm1_09285	BTB/POZ domain containing protein	P16	0.946796	0.880588	0.458652	0.156601	-0.156601	-0.339603	-0.793945	-1.12979	2.07659	1.48689e-08
Bm1_09290	diphthamide biosynthesis protein 2 containing protein		0.447937	0.570914	0.498403	0.0844036	-0.0871452	-0.0844036	-0.568119	-0.421627	1.13903	0.0211025
Bm1_09295	Histone deacetylase 1		-0.299165	0.0411227	0.39911	0.278086	0.232855	-0.0411227	-0.403801	-0.341169	0.802911	0.00141259
Bm1_09300	GTP-ase activating protein for Arf containing protein		-0.658568	0.0683158	-0.0683158	-0.110399	-0.109101	0.364058	0.222918	0.430828	1.0894	0.226691
Bm1_09305	hypothetical protein		-0.335738	-0.370021	-0.600011	-0.150292	0.210091	0.229	0.150292	0.155286	0.82901	0.80381
Bm1_09310	Variant SH3 domain containing protein		0.18131	-0.707997	-0.335041	-0.0358904	0.0519994	-0.0362528	0.0358904	0.387797	1.09579	0.806156
Bm1_09315	DNA polymerase family B containing protein		-0.148753	-0.186233	0.104239	0.0774772	0.134963	-0.0685556	0.0685556	-0.122992	0.321196	0.937653
Bm1_09320	hypothetical protein		-0.32338	0.739008	-0.32338	0.378921	-0.0754998	0.349889	-0.119487	0.0754998	1.06239	0.659444
Bm1_09325	hypothetical protein	P1	-2.92451	-0.406505	0.00248794	-0.485306	0.465304	-0.00248794	0.948835	0.92037	3.87335	4.94801e-06
Bm1_09330	ACR148Wp		0.326124	0.582952	0.518355	-0.209819	-0.0995092	-0.403478	0.0995092	-1.29997	1.88292	0.0413209
Bm1_09335	CG32955-PG		-2.07668	0.0132671	-0.0132671	-0.182602	0.338297	-0.262995	0.372473	0.732099	2.80878	0.363881
Bm1_09340	hypothetical protein	P16	0.0289089	0.429687	0.598439	-0.0289089	0.0658083	-0.105981	-0.609752	-0.865781	1.46422	0.000213125
Bm1_09345	chloride channel protein 7		0.171615	0.00167879	0.0435861	0.0289023	-0.166558	-0.00167879	-0.322841	-0.331029	0.502644	0.426657
Bm1_09350	threonyl-tRNA synthetase, cytoplasmic	P15	0.229702	0.0784331	0.267168	-0.00781843	0.00781843	-0.227339	-0.752246	-1.10754	1.37471	1.4061e-10
Bm1_09355	hypothetical protein	P11	0	0	0	0	0	0.173149	1.57726	1.80677	1.80677	5.5963e-05
Bm1_09360	hypothetical protein	P11	-1.74791	-0.673797	-0.528805	-0.00432313	0.111038	0.00432313	1.93078	1.96246	3.71037	1.54972e-53
Bm1_09370	hypothetical protein		0.0107361	-0.137703	-0.144221	-0.0107361	-0.113348	0.0466925	0.128203	0.233789	0.37801	0.80651
Bm1_09375	Fukutin		-0.288835	-0.288835	-0.288835	0.881649	-0.288835	0.602505	0.288835	0.679961	1.17048	0.161166
Bm1_09380	Fukutin		-0.336224	-0.336224	-0.336224	-0.0622941	0.582944	0.724022	1.09279	0.0622941	1.42901	0.0910864
Bm1_09385	hypothetical protein		1.09353	-0.764518	-0.50774	0.237983	-0.257142	-0.141666	0.141666	0.537869	1.85805	0.107725
Bm1_09390	Mitochondrial carrier protein	P14	1.09831	1.07528	0.568383	0.461914	-0.903334	-0.461914	-1.12732	-0.954694	2.22563	0.00132104
Bm1_09395	RhoGAP domain containing protein		-0.0872222	0.37479	-0.0587369	0.041229	0.278221	0.0142276	-0.0142276	-0.366732	0.741522	0.667341
Bm1_09400	Protein-tyrosine phosphatase containing protein		0.27525	0.049683	-0.00271712	-0.134481	0.160157	0.00271712	-0.277625	-0.0109115	0.552875	0.658199
Bm1_09405	regulator of chromosome condensation		-0.116055	0.0287365	0.37524	-0.0727455	0.211566	0.215957	-0.303775	-0.0287365	0.679015	0.085171
Bm1_09410	hypothetical protein		0.0326874	-0.214095	0.0180438	-0.0180438	0.171781	0.0362246	-0.158791	-0.264113	0.435894	0.648837
Bm1_09415	hypothetical protein		-1.03047	-1.03047	0.0836516	0.00286615	0.55048	-0.00286615	0.528094	-1.03047	1.58095	0.168564
Bm1_09425	TPR Domain containing protein		-1.46377	-1.46377	0.430659	0.723424	-0.034744	0.034744	-0.0354466	0.464627	2.18719	0.482615
Bm1_09430	BmSERPIN	P8	-4.64087	-4.64087	-4.16016	-1.62085	1.62085	2.5405	3.68852	2.35372	8.32939	4.23111e-124
Bm1_09435	BmSERPIN, truncated	P8	-2.75961	-2.75961	-2.75961	-0.711812	1.7243	2.11864	2.1483	0.711812	4.90791	2.89431e-35
Bm1_09445	high mobility group protein		-0.895292	-0.00381775	0.280809	0.00381775	0.169852	0.247919	-0.109691	-0.24449	1.1761	0.328989
Bm1_09450	Formin Homology 2 Domain containing protein		-2.38469	-0.718216	-0.467794	-0.197289	0.197289	0.205608	0.439291	0.435218	2.82399	0.437133
Bm1_09455	HMG box family protein		-4.26637	-0.347687	0.0991065	-0.0381299	-0.108271	0.0381299	0.394131	0.511786	4.77815	0.056415
Bm1_09460	hypothetical protein		0.202828	0.469724	0.434337	-0.0253229	-0.22831	-0.455277	-0.492941	0.0253229	0.962665	0.122048
Bm1_09465	Tubulin-tyrosine ligase family protein	P11	0.262048	0.189441	-0.611208	0.0430684	-0.453966	-0.95868	0.247137	-0.0430684	1.22073	4.24669e-05
Bm1_09470	hypothetical protein		-0.184413	-0.184413	0.660106	-0.184413	0.536088	-0.184413	0.184413	0.986276	1.17069	0.0851072
Bm1_09475	tomosyn (vertebrate synaptic protein) homolog protein 1, isoform c	P6	-1.44708	-0.0838414	-0.0772975	0.0305495	0.00682659	-0.00682659	0.879884	1.32731	2.77439	4.27249e-08
Bm1_09480	hypothetical protein		-0.250242	-0.250242	-0.250242	0.781564	0.534988	0.0478774	-0.0478774	0.45098	1.03181	0.38304
Bm1_09485	Tomosyn (vertebrate synaptic protein) homolog protein 1-like	P13	0.452819	-0.874535	-0.76015	-0.143	-0.197128	0.143	0.815681	1.23254	2.10708	3.65404e-10
Bm1_09490	60S ribosomal protein L14	P16	0.591256	0.905612	0.233955	-0.233955	0.235505	-0.253533	-1.07284	-1.32996	2.23558	6.89717e-26
Bm1_09495	hypothetical protein		-3.66101	0.149878	0.469607	0.285503	-0.0260089	0.0260089	-0.213337	-0.106674	4.13062	0.261322
Bm1_09505	hypothetical protein		0	0	0	0	0	0.311245	0	0	0.311245	0.742578
Bm1_09510	hypothetical protein	P7	-1.38446	-1.38446	-0.255678	-0.352979	0.255678	0.939825	0.999545	1.61239	2.99685	0.00120028
Bm1_09515	hypothetical protein		-0.197076	-0.197076	0.283678	-0.197076	-0.197076	0.367109	0.197076	1.16989	1.36697	0.0665867
Bm1_09525	Zinc finger, C2H2 type family protein	P13	2.7433	-0.034001	0.034001	-1.09454	-0.6722	-0.925189	0.190728	0.271375	3.83784	0.000333941
Bm1_09530	Malate/L-lactate dehydrogenase family protein		-1.6975	-0.127549	-0.37686	0.176259	0.21993	0.18455	-0.239175	0.127549	1.91743	0.261839
Bm1_09535	hypothetical protein	P11	-1.58209	-1.58209	-1.10153	-0.163946	0.163946	0.861746	2.2524	2.54985	4.13194	2.24501e-19
Bm1_09540	hypothetical protein		-0.451358	-0.451358	-0.451358	0.053229	0.819335	0.220406	-0.053229	0.256172	1.27069	0.511126
Bm1_09545	Leucine Rich Repeat family protein		-1.22499	0.608635	-0.0338034	-0.418074	-0.460932	0.0784082	0.268089	0.0338034	1.83362	0.185551
Bm1_09550	glutamate--cysteine ligase	P9	-1.15411	-0.467736	-0.917238	0.456981	0.201555	-0.145894	0.219629	0.145894	1.61109	1.44533e-09
Bm1_09555	Plasmid Maintenance Protein containing protein		-0.598235	-0.339752	-0.0558992	0.0558992	-0.100738	0.101587	0.517824	0.163127	1.11606	0.36941
Bm1_09560	3'-5' exonuclease family protein	P16	0.0443886	0.352589	0.238934	0.0277328	-0.0277328	-0.0399942	-0.304222	-0.867535	1.22012	0.00154695
Bm1_09565	Transmembrane amino acid transporter protein	P9	-0.898007	-0.898007	-0.898007	0.133808	-0.133808	0.788468	2.35216	1.55521	3.25017	6.02169e-09
Bm1_09570	hypothetical protein	P10	-0.755799	-0.755799	-0.755799	-0.481801	0.481801	1.11967	1.10448	1.20008	1.95588	0.00187579
Bm1_09575	ZU5 domain containing protein	P10	0.47178	0.265462	-0.918502	-0.466787	-0.669061	0.0941937	0.896268	-0.0941937	1.81477	0.00241467
Bm1_09590	PH domain containing protein	P12	-0.0710531	-0.274226	-0.208134	-0.0901968	0.0710531	0.632918	1.13544	2.18135	2.45558	5.49198e-11
Bm1_09595	T-complex protein 1, gamma subunit	P16	0.193818	0.632388	0.257616	-0.102303	0.102303	-0.472436	-1.35723	-2.01077	2.64316	2.26825e-38
Bm1_09600	hypothetical protein		0.285856	0.253747	-0.0671863	0.0671863	0.0907269	-0.621384	-0.567223	-0.67081	0.956666	0.252088
Bm1_09605	hypothetical protein	P4	-0.833364	-0.833364	-0.355071	0.466064	0.845626	2.16903	-0.126643	0.126643	3.0024	1.03183e-06
Bm1_09610	Troponin T	P10	-1.955	-0.892948	-1.955	-0.782022	0.782022	4.43491	7.71251	8.32373	10.2787	1.10037e-278
Bm1_09615	hypothetical protein	P13	0.859716	0.102198	-0.446257	-0.306708	-0.646942	-0.102198	0.537347	1.14999	1.79693	6.07234e-22
Bm1_09635	hypothetical protein		0	0	0.844885	0	0.498506	0.288521	0	0	0.844885	0.412481
Bm1_09640	Nematode cuticle collagen N-terminal domain containing protein	P2	-3.18232	-1.51629	1.66493	-0.93109	1.172	2.92941	0.249987	-0.249987	6.11173	6.02572e-62
Bm1_09655	Ankyrin homolog precursor		-3.70769	0.105915	-0.105915	-0.24468	-0.4209	0.120377	0.298399	0.268922	4.00609	0.175385
Bm1_09660	hypothetical protein		0	1.05927	0.49226	0	0	0	0	0	1.05927	0.356978
Bm1_09665	hypothetical protein		-2.81383	0.463791	-0.190554	0.088699	0.0370033	-0.0370033	0.26134	-0.068223	3.27762	0.739109
Bm1_09670	NADH-ubiquinone oxidoreductase B22 subunit		-1.23277	-0.181956	0.253549	-0.311944	0.0925015	-0.0925015	0.298887	0.365446	1.59822	0.250143
Bm1_09675	Variant SH3 domain containing protein		-2.85869	0.0526505	0.0957873	-0.0824395	-0.0145537	0.293878	-0.2813	0.0145537	3.15257	0.643883
Bm1_09680	elongation factor 1-alpha	P12	-0.222751	-0.252199	-0.750605	0.0133151	0.00260238	-0.00260238	0.670625	1.97636	2.72697	8.47654e-10
Bm1_09685	NOLA3 protein		0.246422	0.202081	0.112997	0.115444	-0.112997	-0.414719	-0.585206	-0.620355	0.866777	0.00600107
Bm1_09690	Fatty acid hydroxylase family protein	P10	-1.16676	-0.340754	-0.456005	0.0253883	-0.0253883	1.5589	2.35978	2.16049	3.52654	1.22931e-43
Bm1_09695	hypothetical protein	P12	-0.935219	-0.935219	-0.0908239	-0.935219	0.18268	0.0908239	0.168353	1.79461	2.72983	0.000718889
Bm1_09705	Probable molybdopterin binding domain containing protein		-3.6423	-1.5519	-0.371178	0.159947	-0.0837702	0.0837702	0.148678	0.342077	3.98438	0.04831
Bm1_09710	RanBP1 domain containing protein		-0.498239	-0.0819313	-0.00835496	0.150559	0.0209666	0.207479	0.00835496	-0.255444	0.705718	0.294135
Bm1_09715	hypothetical protein		-0.588566	0.0729937	0.0514345	0.0576679	-0.07552	0.243605	-0.0514345	-0.18862	0.832171	0.855902
Bm1_09720	hypothetical protein	P10	-0.435232	-0.435232	-0.435232	-0.161278	0.161278	1.22696	2.99574	3.48254	3.91777	6.93507e-21
Bm1_09735	ankyrin repeat and SOCS box protein 3		-0.127376	0.763671	0.411746	0.54971	0.127376	-0.282235	-0.187027	-0.760054	1.52373	0.0728744
Bm1_09740	hypothetical protein		-2.29683	-0.630355	0.980314	0.522681	0.0290992	-0.171646	-0.0290992	0.903723	3.27714	0.0262725
Bm1_09745	glutamate decarboxylase, 67 kDa isoform	P10	-1.6942	-1.6942	-0.324706	-0.818015	0.324706	1.64279	2.94188	3.00752	4.70172	1.01123e-35
Bm1_09750	RIKEN cDNA 4930579A11	P14	0.523957	0.483662	0.276779	0.129633	-0.129633	-0.279844	-0.320253	-0.603366	1.12732	0.000803544
Bm1_09755	LOC443605 protein	P16	0.211191	0.261433	0.30909	-0.0655083	0.0655083	-0.196817	-0.746926	-1.11041	1.4195	3.00907e-05
Bm1_09760	U2 auxiliary factor 65 kDa subunit	P15	1.02712	0.499769	0.170182	-0.0456676	0.0456676	-0.112536	-0.613271	-0.565548	1.64039	1.51971e-09
Bm1_09765	Ubiquitin-conjugating enzyme family protein		1.75084	-0.691285	0.153242	0.608168	-0.00519083	-0.106145	-0.494334	0.00519083	2.44213	0.401799
Bm1_09775	serpin	P13	-0.59109	-3.04048	-2.55901	-2.33839	0.59109	2.34636	3.85598	4.31699	7.35747	7.27324e-170
Bm1_09780	hypothetical protein	P4	0	0	0	0	0	4.32135	2.45382	0.70281	4.32135	2.61521e-34
Bm1_09795	Leucine Rich Repeat family protein		0.645959	-0.738141	0.108728	-0.768174	0.363699	-0.181841	0.148822	-0.108728	1.41413	0.603402
Bm1_09800	hypothetical protein		0	0	0.844542	0	0	0	0	0	0.844542	0.313515
Bm1_09810	Lethal protein 805, isoform d		-0.730514	-0.730514	-0.730514	0.145962	-0.145962	0.157259	0.469989	1.54785	2.27837	0.018705
Bm1_09815	hypothetical protein		0	0	0	0	0	0	0.397558	0.707448	0.707448	0.323185
Bm1_09820	hypothetical protein		-0.0760157	-0.0760157	-0.0760157	-0.0760157	0.140322	0.0760157	0.155495	0.618005	0.694021	0.765279
Bm1_09825	hypothetical protein		1.91361	-0.534424	-0.534424	-0.0303629	-0.0775376	0.0303629	0.914088	1.00062	2.44804	0.0260232
Bm1_09830	hypothetical protein		-1.77252	1.14114	0.143474	-0.143474	0.500536	0.358823	-0.623782	-0.805945	2.91366	0.143668
Bm1_09835	hypothetical protein	P4	-1.28806	0.378415	-0.161678	0.0117882	-0.0117882	2.68508	0.324677	-0.581005	3.97314	3.69247e-20
Bm1_09840	hypothetical protein	P4	-0.112735	-0.112735	-0.112735	-0.112735	0.36874	1.52231	0.112735	0.594671	1.63504	0.00521127
Bm1_09850	hypothetical protein		-4.58784	-0.226074	0.094003	0.361012	0.227709	0.174305	-0.094003	-0.219339	4.94885	0.02515
Bm1_09855	sarcoma antigen NY-SAR-91		0.0893544	0.0527352	-0.078237	-0.000134457	0.000134457	-0.43437	-0.121256	0.474569	0.908938	0.664139
Bm1_09860	Phosphatidylinositol 3- and 4-kinase family protein		0.45446	-0.270609	0.190285	0.0401691	-0.104917	-0.0597078	-0.0401691	0.0709672	0.725069	0.926541
Bm1_09865	hypothetical protein		-0.452953	-0.452953	0.0264696	0.0505388	-0.0264696	0.422491	1.06242	-0.0543392	1.51538	0.203823
Bm1_09870	hypothetical protein		-0.0180575	0.364847	0.0118334	-0.0118334	-0.104372	-0.145517	0.359493	0.223804	0.510365	0.80557
Bm1_09875	hypothetical protein		0	0	0.473915	0	0	0	0.19682	0	0.473915	0.719928
Bm1_09885	hypothetical protein	P5	-3.36132	-0.675434	-0.738037	0.52544	0.650361	-0.121262	0.121262	0.47458	4.01168	0.00197805
Bm1_09895	basement membrane proteoglycan	P1	-4.47743	-2.38633	-1.19867	-0.550181	0.550181	1.5981	3.31903	2.68053	7.79646	3.71725e-105
Bm1_09900	40S ribosomal protein S7	P16	0.137166	0.45313	0.435721	-0.137166	0.151534	-0.200744	-1.05359	-1.13751	1.59064	9.54568e-16
Bm1_09905	hypothetical protein	P6	-1.91413	0.17801	-0.00892022	-0.49578	-0.260672	0.00892022	2.05848	2.42347	4.3376	8.84207e-15
Bm1_09910	hypothetical protein		-0.33399	-0.33399	0.15225	-0.0600359	-0.0860781	0.114058	0.845466	0.0600359	1.17946	0.416263
Bm1_09915	CG12491-PA		0.00821856	-0.354819	-0.251835	-1.14343	0.525835	-0.00821856	0.358355	0.481465	1.66927	0.0526586
Bm1_09920	voltage-dependent calcium channel	P11	-0.559299	-0.559299	-0.559299	-0.0555009	0.0555009	0.658371	1.9316	2.04656	2.60586	1.33939e-07
Bm1_09930	kinesin light chain		-0.981936	1.10831	-0.493642	-0.104548	0.104548	-0.41577	0.483714	0.191579	2.09024	0.42222
Bm1_09935	hypothetical protein		-1.08839	-1.08839	0.97635	-0.584095	0.107319	-0.104488	0.298784	0.104488	2.06474	0.260891
Bm1_09940	P40	P4	-1.54189	0.124592	-0.704002	-0.124592	-1.31174	1.43356	0.378106	0.133976	2.97545	6.59414e-07
Bm1_09945	hypothetical protein	P9	-1.2861	-1.2861	-0.809505	1.53228	-1.2861	0.809505	4.03168	2.12282	5.31778	6.32256e-25
Bm1_09950	Gamma-glutamyltranspeptidase family protein	P7	-4.34178	-4.34178	-2.14592	0.204301	-0.189857	1.12974	1.07777	0.189857	5.47152	2.18332e-34
Bm1_09955	hypothetical protein	P7	-3.21186	-2.15052	-0.786015	-0.309309	0.309309	0.950159	1.58645	1.15337	4.79831	2.45332e-17
Bm1_09960	hypothetical protein	P6	-2.43651	0.250087	-1.06786	-0.250087	-0.342537	0.285794	0.908238	0.441193	3.34475	0.00316721
Bm1_09970	hypothetical protein		-0.588109	-0.588109	-0.0955384	1.59604	0.41585	0.386445	0.0955384	-0.588109	2.18415	0.0223801
Bm1_09975	hypothetical protein	P9	-1.56067	-1.56067	0.193978	1.90314	0.649342	-0.196053	0.844264	-0.193978	3.46381	8.6397e-07
Bm1_09980	Zinc carboxypeptidase family protein	P9	-0.843652	-0.843652	-0.843652	0.965328	-0.843652	1.60924	2.57625	0.843652	3.4199	4.51088e-12
Bm1_09985	hypothetical protein		-0.197985	-0.197985	-0.197985	-0.197985	0.222795	0.239652	0.197985	0.201775	0.437638	0.773181
Bm1_10000	HEAT repeat family protein	P6	-3.54396	-1.12531	-0.83383	-0.136159	0.136159	0.973132	1.90588	1.7331	5.44985	2.14847e-25
Bm1_10005	Rap/ran-GAP family protein		-2.85797	0.202189	-0.13701	0.225425	0.0112689	0.0179468	-0.0112689	-0.406452	3.08339	0.0233042
Bm1_10010	Torsin family protein		-1.38878	0.274141	0.293614	0.307792	0.0313607	-0.0313607	-0.0802984	-0.135434	1.69657	0.704859
Bm1_10015	hypothetical protein		-2.82764	0.450023	0.905617	0.115908	-0.223561	4.71504e-06	-4.71504e-06	-0.311908	3.73326	0.165679
Bm1_10020	hypothetical protein		-0.104103	0.132454	0.524198	-0.928825	0.0162641	-0.0162641	0.0891778	-0.123953	1.45302	0.37643
Bm1_10025	Probable RNA 3'-terminal phosphate cyclase-like protein, putative	P15	1.09063	0.42505	0.233396	-0.106899	0.106899	-0.474378	-1.19566	-1.25265	2.34329	6.68104e-13
Bm1_10030	hypothetical protein		-0.39459	-0.39459	0.0830012	0.307773	-0.16849	0.183816	0.00155547	-0.00155547	0.702364	0.95007
Bm1_10035	GCC2 and GCC3 family protein	P2	-4.38937	0.184353	1.36291	-0.347649	1.95013	1.85667	-0.184353	-0.842293	6.3395	8.78646e-43
Bm1_10040	Lipase family protein	P3	-1.41953	-0.358534	1.9536	-0.543286	0.358534	3.72579	1.28102	-0.461787	5.14532	1.8762e-36
Bm1_10045	TBC domain containing protein		0.252587	-0.389896	0.0226566	-0.027031	-0.392855	0.177744	-0.0226566	0.23318	0.645442	0.515503
Bm1_10050	hypothetical protein	P5	-3.34251	0.226129	0.509542	0.752671	0.0501287	-0.0501287	-0.422852	-0.410223	4.09518	0.00166567
Bm1_10055	Patatin-like phospholipase family protein		-0.0317609	0.36794	0.0475312	-0.107248	-0.299963	0.0231608	-0.0231608	0.115578	0.667904	0.87668
Bm1_10060	hypothetical protein	P4	-1.09745	-0.980054	-0.584529	-0.195067	0.195067	0.701256	0.545553	0.520202	1.7987	1.5605e-05
Bm1_10065	hypothetical protein		-1.10392	-0.0429268	-0.62383	-0.401905	0.0429268	0.756037	0.692455	0.265833	1.85996	0.134463
Bm1_10070	Bestrophin family protein	P5	0	2.42118	1.13698	0.702345	0	0	0	0	2.42118	0.000163265
Bm1_10075	hypothetical protein		-1.0464	0.0146906	1.1463	-0.0146906	-0.116777	-0.165105	0.695279	0.32043	2.19269	0.175435
Bm1_10080	Hepatocellular carcinoma-associated antigen 66		1.09501	-0.119744	0.319709	0.0427153	-0.0427153	-0.328278	0.400229	-0.518371	1.61338	0.677592
Bm1_10100	transcription enhancer factor-1-like protein EGL-44		-2.11109	-1.05023	-0.0574868	0.664557	0.335661	-0.634661	0.265609	0.0574868	2.77565	0.110844
Bm1_10110	hypothetical protein		0.146748	1.39187	0.31482	-0.498293	0.397678	-0.183152	-0.474806	-0.146748	1.89016	0.168372
Bm1_10115	hypothetical protein	P1	-2.20234	-0.111478	0.584961	0.111478	-0.169155	-0.326907	1.09677	2.1373	4.33964	1.01529e-09
Bm1_10120	Viral A-type inclusion protein repeat containing protein		0.769339	-0.040889	0.00588753	-0.00622863	-0.215036	0.0390198	-0.00588753	0.254085	0.984375	0.583212
Bm1_10125	uridine phosphorylase family protein	P10	-0.72201	-0.72201	-0.72201	-0.448128	0.448128	2.48419	3.39638	4.67121	5.39322	3.84729e-50
Bm1_10130	hypothetical protein		0	0	0	0	0	0	0.36954	0.390953	0.390953	0.572772
Bm1_10140	Zinc finger, C2H2 type family protein		-1.11654	-1.11654	0.252868	-0.414326	-0.0629407	0.0936577	0.879985	0.0629407	1.99652	0.120013
Bm1_10145	hypothetical protein		0	0	0	0.702376	0.445274	0.296613	0	0	0.702376	0.437817
Bm1_10150	hypothetical protein		0	0	0	0	0	0.169084	1.0824	0.707198	1.0824	0.0365469
Bm1_10155	hypothetical protein		0	0	0.493473	0	0	0	0.739422	0.389974	0.739422	0.232429
Bm1_10160	hypothetical protein		-1.21022	0.880415	0.359415	0.600544	-0.426933	0.0544099	-0.0544099	-1.21022	2.09064	0.0652107
Bm1_10165	Synapse defective protein 1, isoform b		0	0	0.870606	0	0.395953	0.286215	0	0	0.870606	0.449318
Bm1_10175	Patched related family protein 12, isoform b	P12	0	0	0	0	0	0.324906	0	1.68209	1.68209	0.00172643
Bm1_10185	hypothetical protein		-0.423103	-0.423103	0.705272	0.0806957	0.0444841	-0.112838	-0.0444841	0.536804	1.12837	0.710911
Bm1_10190	hypothetical protein		-1.23344	0.85977	0.530646	0.577064	0.0554159	-0.350714	-0.0554159	-0.522624	2.09321	0.332734
Bm1_10195	hypothetical protein	P5	-1.308	1.60252	0.888203	0.502163	0.343944	-0.343944	-0.754591	-0.600951	2.91053	0.00198786
Bm1_10200	HMG box family protein	P6	-0.739974	0.0862927	-0.0788637	-0.0999846	0.0437808	-0.0437808	1.05477	1.38238	2.12235	2.3296e-06
Bm1_10205	GH08189p		0	0	0	0	0.219689	0.153507	0	0	0.219689	0.898964
Bm1_10215	Calcium-binding protein		0	0	0	0.274185	0	0	0.19682	0	0.274185	0.833009
Bm1_10225	hypothetical protein		-1.99254	1.43893	-0.0755155	1.20043	-0.0726387	0.0471626	0.403941	-0.0471626	3.43147	0.0132898
Bm1_10230	Calcium binding EGF domain containing protein	P2	-3.50617	-0.819694	1.96821	-0.380839	0.353033	2.22504	0.57392	-0.353033	5.7312	1.29971e-30
Bm1_10240	hypothetical protein		1.95857	0.627759	-0.0900025	0.0900025	-0.269515	-0.310095	-0.245704	0.396955	2.26866	0.225075
Bm1_10245	Probable 26S proteasome non-ATPase regulatory subunit 9, putative		-0.564437	0.498564	-0.0756353	0.736079	0.0756353	-0.141525	0.163282	-0.17188	1.30052	0.720227
Bm1_10250	RNA binding protein		0.816367	1.07647	0.306161	-0.306161	0.378692	-0.320937	-0.384002	-0.957329	2.0338	0.033841
Bm1_10255	hypothetical protein		-0.113261	-0.113261	-0.113261	0.160153	-0.113261	0.558788	0.113261	0.835682	0.948943	0.321238
Bm1_10275	Type III restriction enzyme, res subunit family protein	P14	0.951146	1.05405	0.0167929	-0.0167929	-0.207967	-0.834186	-0.205543	0.547068	1.88823	0.00181832
Bm1_10280	transketolase	P15	3.48341	0.901125	1.59069	0.00690674	-0.00690674	-0.392838	-1.40435	-0.46342	4.88776	3.9777e-09
Bm1_10290	hypothetical protein		0.802201	-0.0813568	0.0888367	-0.310108	0.0922217	0.0760297	-0.0760297	-0.448992	1.25119	0.677033
Bm1_10295	RE23670p		-0.0470354	0.0802945	0.0470354	0.237	-0.109074	-0.13086	-0.195699	0.078906	0.432699	0.855842
Bm1_10300	PXA domain containing protein		1.2174	-0.221297	0.21176	0.0744552	0.0468656	-0.195354	-0.0468656	-0.40005	1.61745	0.464797
Bm1_10305	MSF1-like conserved region family protein		0.286865	0.0781919	0.373502	0.615975	-0.0999583	-0.0781919	-0.358065	-0.284514	0.974039	0.247744
Bm1_10310	trehalase I		1.95843	-1.3321	-0.836147	0.191607	-0.191607	0.211571	-0.20868	0.984118	3.29053	0.184793
Bm1_10315	Long protein 1, isoform b		-0.609455	0.453482	0.223759	-0.105143	-0.164012	0.949825	-0.609455	0.105143	1.55928	0.0314418
Bm1_10320	Protein kinase C and casein kinase substrate in neurons protein 2		1.71423	0.739131	-0.268101	-0.0195215	0.0362277	0.0195215	-0.344624	-0.331946	2.05885	0.153774
Bm1_10325	hypothetical protein		0	0	0.829117	0	0	0	0	0.697319	0.829117	0.130766
Bm1_10330	hypothetical protein		0.775074	0.026557	-0.570272	0.409307	-0.218479	-0.026557	-0.141109	0.348911	1.34535	0.603982
Bm1_10335	hypothetical protein	P10	-1.06144	-1.06144	-0.581001	-0.787551	0.581001	0.964398	1.87794	1.613	2.93938	2.63307e-08
Bm1_10350	hypothetical protein		-0.776796	0.339276	0.113304	0.0296028	-0.126888	-0.066265	-0.0296028	0.243955	1.11607	0.966819
Bm1_10355	hypothetical protein		-0.29762	1.16876	0.466435	0.509217	-0.0176767	-0.265071	0.0176767	-0.22784	1.46638	0.134528
Bm1_10360	hypothetical protein	P1	-3.0223	0.0818789	-0.405244	-0.336487	-0.0818789	1.45992	1.47845	1.50331	4.52561	1.83893e-12
Bm1_10365	hypothetical protein		-0.497962	-0.497962	-0.00654173	0.00654173	0.539908	0.582945	0.103433	-0.497962	1.08091	0.450938
Bm1_10385	hypothetical protein		-0.136996	-0.136996	-0.136996	0.136996	0.498136	-0.136996	1.01606	0.823011	1.15305	0.0374701
Bm1_10390	hypothetical protein		-1.30702	-1.30702	-0.166718	0.504773	-0.0328505	0.0328505	0.741146	0.835585	2.14261	0.367533
Bm1_10395	Heavy chain, unconventional myosin protein 2, isoform d, putative	P6	-3.21775	0.215191	-0.421795	0.102172	-1.01451	-0.102172	1.42339	0.956133	4.64114	3.49253e-13
Bm1_10400	haloacid dehalogenase-like hydrolase domain containing 2, putative		1.12224	-0.05229	-0.301306	0.057659	-0.213414	-0.253524	0.05229	0.591928	1.42355	0.0467715
Bm1_10405	Serine/threonine-protein kinase K06H7.1		0	0	0.843905	0	0.444313	0	0	0.399517	0.843905	0.23534
Bm1_10410	Cuticle collagen	P12	-0.363856	-0.363856	-0.363856	-0.0904782	0.93948	0.0904782	4.84514	9.01339	9.37725	2.32797e-74
Bm1_10435	Chitin binding Peritrophin-A domain containing protein	P5	-2.34435	-0.253389	0.184337	0.944549	1.48986	1.22535	-0.498274	-0.184337	3.83422	3.38141e-07
Bm1_10440	hypothetical protein		-1.14277	-0.0797478	-1.14277	-0.440374	0.102271	0.0797478	0.754945	0.551519	1.89771	0.120392
Bm1_10445	Orcokinin peptides type B precursor	P1	-2.73888	-1.6776	-0.8213	-0.691204	0.691204	1.98181	2.2123	3.22917	5.96806	1.16088e-50
Bm1_10450	Protamine P1 family protein		-2.18453	-2.18453	0.0164195	0.591825	-0.406253	-0.0164195	0.296933	0.253755	2.77636	0.0838713
Bm1_10455	hypothetical protein	P12	-1.43313	0.231725	-0.946824	-0.55698	0.205954	-0.205954	1.45656	3.2051	4.63823	9.811e-21
Bm1_10460	hypothetical protein		-0.0998014	-0.0998014	0.376331	0.403998	0.15685	-0.0998014	0.0998014	-0.0998014	0.503799	0.675075
Bm1_10465	hypothetical protein		-2.29923	-1.23714	0.0116986	-0.17964	0.582008	0.123647	-0.0116986	0.303187	2.88124	0.359406
Bm1_10470	hypothetical protein		-0.968503	1.12359	0.398417	-0.266217	0.202905	-0.202905	0.313381	-0.569877	2.0921	0.443094
Bm1_10475	hypothetical protein		0.873414	0.152608	0.153554	-0.0437585	-0.226005	-0.148052	-0.0156497	0.0156497	1.09942	0.568641
Bm1_10480	metallopeptidase family M24 containing protein	P16	0.181935	0.395607	0.455988	0.0416247	-0.0416247	-0.163971	-0.727933	-1.03156	1.48755	6.14553e-08
Bm1_10485	hypothetical protein		-0.469503	-0.269633	0.0800683	0.0777046	0.195262	0.151775	-0.0777046	-0.433448	0.664765	0.386041
Bm1_10490	kynurenine-oxoglutarate transaminase		0.79872	0.380428	-0.251692	0.00247766	-0.00247766	-0.155841	-0.0838583	0.156465	1.05041	0.926642
Bm1_10500	AMOP domain containing protein	P8	-1.41007	-0.81354	-0.11792	0.742129	0.322964	0.168607	0.11792	-0.252085	2.1522	1.36332e-09
Bm1_10505	cuticle collagen 34	P6	-1.28225	0.813708	-0.437991	-0.109367	0.109367	-0.715481	0.253832	1.8186	3.10085	0.000988009
Bm1_10510	hypothetical protein		-0.71986	0.342874	-0.242045	-0.216061	0.177786	-0.177786	0.566855	1.4512	2.17106	0.0619017
Bm1_10515	Serine/threonine-protein kinase F42G10.2		-3.65916	0.258576	-0.106699	0.489375	0.0717875	-0.0717875	0.188622	-0.496229	4.14854	0.153075
Bm1_10520	DESR1	P15	0.885318	0.26541	0.112793	-0.112793	0.140147	-0.504538	-0.780223	-0.802522	1.68784	0.000255226
Bm1_10525	EGF-like domain containing protein		0	0	0	0.273396	0	0	0.197417	0.402311	0.402311	0.762966
Bm1_10530	PX domain containing protein		0.268238	0.522148	0.347594	-0.314119	-0.0572361	-0.28678	-0.218173	0.0572361	0.836267	0.689499
Bm1_10535	hypothetical protein	P1	-3.39941	-0.732875	-0.0881263	-0.0384832	0.0384832	0.636899	1.17442	0.447852	4.57383	3.38687e-14
Bm1_10540	hypothetical protein		1.18393	-3.05091	-0.246868	-0.318802	-0.111368	0.284973	0.111368	0.342213	4.23484	0.0130349
Bm1_10545	hypothetical protein		0	0	0	0	0	0.330134	0.22728	0	0.330134	0.787198
Bm1_10550	hypothetical protein		0	0	0	0	0	0.173881	0.425943	0	0.425943	0.737387
Bm1_10555	hypothetical protein		-1.51627	0.150212	0.535177	-0.216137	0.184333	0.223974	-0.567492	-0.150212	2.05145	0.628413
Bm1_10560	hypothetical protein		0	0	0	0	0	0.153507	0	0.390633	0.390633	0.807316
Bm1_10565	MGC83825 protein		-1.30208	-1.30208	-0.181781	0.592355	-0.382647	0.181781	0.326614	0.228224	1.89444	0.436392
Bm1_10570	glycosyltransferase 28 domain containing 1		-3.34197	0.0886418	0.214877	0.438612	-0.0886418	0.187523	-0.500518	-0.662537	3.78059	0.0409341
Bm1_10575	hypothetical protein		-2.73426	-0.313086	0.368079	0.127089	0.394793	0.518756	-0.316123	-0.127089	3.25301	0.280697
Bm1_10585	Integrase core domain containing protein		0	0	0	0	0.448231	0	0	0	0.448231	0.59116
Bm1_10590	hypothetical protein	P12	0	0	0	0	0	0.156749	0.84949	1.67691	1.67691	0.00200956
Bm1_10595	unknown, identical	P11	-0.156725	-0.156725	-0.156725	-0.156725	0.276853	0.156725	4.67931	4.9792	5.13592	4.00315e-88
Bm1_10600	unknown, identical	P11	0	0	0	0	0	0	2.19671	2.88359	2.88359	3.77101e-15
Bm1_10605	Variant SH3 domain containing protein		-0.997792	-0.388817	-0.0146866	0.0146866	-0.17161	0.120417	0.0480439	0.114538	1.11821	0.84209
Bm1_10630	WW domain containing protein	P7	-3.25745	-3.25745	-0.54286	-0.772487	0.54286	0.607415	0.86613	0.729502	4.12358	1.44533e-09
Bm1_10635	hypothetical protein		0	0	0	0	0	0.153879	0.425943	0	0.425943	0.738259
Bm1_10640	chloramphenicol acetyltransferase	P13	3.94426	1.08887	0.289851	0.452392	-0.362689	-0.289851	-0.57769	-0.57769	4.52195	1.3306e-05
Bm1_10645	aminoglycoside 3'-phosphotransferase	P13	4.55804	-0.412148	0.731025	0.463564	-0.412148	0.0227206	-0.412148	-0.0227206	4.97019	6.98937e-08
Bm1_10650	resolvase	P13	4.6619	-0.136667	-0.136667	0.136667	-0.136667	0.392745	-0.136667	0.809402	4.79857	2.5024e-07
Bm1_10655	SPRY domain containing protein		0.366952	-0.524614	0.283622	-0.0400256	-0.294354	-0.22885	0.0400256	0.0455325	0.891566	0.878929
Bm1_10660	Hypothetical 20.9 kDa protein in PLB1-HXT2 intergenic region, putative	P1	-2.75821	-1.09173	-0.134932	-0.571435	0.134932	0.767057	1.63919	2.82773	5.58594	2.28104e-20
Bm1_10665	Trypsin family protein		-0.453556	-0.453556	0.0261089	-0.179632	-0.0261089	0.320602	0.390527	0.726099	1.17965	0.672403
Bm1_10670	coatomer gamma subunit	P2	-1.18139	-0.235073	0.301563	-0.17042	0.0655154	0.413498	0.0215075	-0.0215075	1.59488	0.00334412
Bm1_10675	hypothetical protein		-3.29272	0.402581	-0.580164	-0.166228	-0.142393	0.386294	0.142393	0.260615	3.6953	0.103353
Bm1_10680	hypothetical protein	P15	0.3429	0.00394923	0.182775	0.342243	-0.00394923	-0.320096	-0.441031	-1.38603	1.72893	2.78287e-07
Bm1_10685	Proable exocyst complex component Sec6		1.62072	0.353125	-0.135511	0.200446	0.135511	-0.178897	-0.654165	-0.182176	2.27489	0.231127
Bm1_10690	Proable exocyst complex component Sec6		0.0743987	-0.184096	0.475284	0.292321	0.0423992	-0.0423992	-0.333903	-0.600293	1.07558	0.0140991
Bm1_10695	hypothetical protein	P14	1.22745	0.264817	-0.0782375	0.178335	0.0782375	-0.38507	-0.432119	-0.708624	1.93607	0.00351651
Bm1_10700	OV39 antigen (Fragment)-like		-0.193406	0.0790227	0.121382	0.117168	-0.536199	-0.81789	-0.0286987	0.0286987	0.939272	0.0509094
Bm1_10705	hypothetical protein	P3	-1.79004	-1.55619	-0.0423689	0.22489	0.528667	0.856099	0.0423689	-0.0675703	2.64613	4.10719e-05
Bm1_10725	hypothetical protein		-0.688897	0.372266	0.887917	0.61148	-0.256883	-0.0149013	0.0149013	-0.2937	1.57681	0.380249
Bm1_10730	Type III restriction enzyme, res subunit family protein		-0.796627	0.0932066	-0.137877	-0.0308588	0.121758	0.0308588	-0.14387	0.253071	1.0497	0.855902
Bm1_10735	Helix-loop-helix DNA-binding domain containing protein		-0.327255	0.134143	0.380326	-0.134143	-0.17145	-0.15656	0.177975	0.324144	0.707581	0.942382
Bm1_10740	TAP C-terminal domain containing protein	P14	1.42607	0.799374	-0.151889	-0.0315078	0.104801	-0.369241	-0.677702	0.0315078	2.10377	9.72687e-05
Bm1_10745	hypothetical protein		0.812255	0.593738	0.31093	0.0650689	-0.0650689	-0.305859	-0.694827	-0.332347	1.50708	0.186611
Bm1_10750	Leucine Rich Repeat family protein		0.423561	-0.0816793	0.00462794	-0.00462794	0.0223185	0.148369	-0.220298	-0.243677	0.667239	0.831439
Bm1_10755	hypothetical protein		0.325391	0.292789	0.170685	-0.0302433	0.0302433	-0.666194	-0.804065	-0.706541	1.12946	0.134064
Bm1_10760	Ras-related protein M-Ras	P16	-0.41115	0.0276164	0.2157	-0.0276164	0.0987304	0.17156	-1.59762	-1.66336	1.87906	6.10508e-09
Bm1_10770	hypothetical protein		0.165474	-2.28322	-0.369327	0.305141	0.0504739	-0.166233	-0.0504739	0.0676165	2.58836	0.360934
Bm1_10775	GH09271p		0	0	0	0	0	0.174358	0	0.390633	0.390633	0.806126
Bm1_10780	mannosyltransferase		-1.0562	-0.144906	0.0686017	0.129864	-0.0400627	0.147461	0.0400627	-0.29431	1.20366	0.63682
Bm1_10785	diphthine synthase	P15	1.17911	0.439751	0.241322	0.0927088	-0.0927088	-0.574821	-1.7163	-1.65056	2.89541	9.84305e-18
Bm1_10790	hypothetical protein		-1.06083	-0.35248	0.0902941	0.261111	-0.0902941	0.171936	0.169238	-0.125395	1.32195	0.573004
Bm1_10795	Peptide methionine sulfoxide reductase family protein	P9	-0.124554	-0.542047	-0.363609	1.34292	0.124554	0.575032	0.2827	-0.348863	1.88497	3.28729e-07
Bm1_10800	protein F10G7.2	P16	-0.0323466	0.337764	0.351296	0.0323466	0.237898	-0.0385225	-1.0309	-1.44912	1.80042	8.1602e-19
Bm1_10805	protein F10G7.1	P13	1.34049	0.200971	0.355712	0.139973	-0.139973	-0.229587	-0.55661	-0.713574	2.05407	7.61816e-10
Bm1_10810	hypothetical protein		-1.204	2.0713	0.370103	-0.0310793	0.655159	-0.137486	0.0310793	-0.506148	3.2753	0.0575841
Bm1_10820	KIAA1033 protein	P16	0.557892	0.43645	-0.103368	0.103368	0.2465	-0.258543	-0.53572	-1.04336	1.60125	0.00017083
Bm1_10825	GTP-ase activating protein for Arf containing protein		-0.858382	0.0219545	-0.200975	-0.225164	-0.0219545	0.257258	0.298237	0.141868	1.15662	0.039885
Bm1_10830	hypothetical protein		0.426306	0.198422	0.0964365	0.204811	-0.0964365	-0.28191	-0.152606	-0.368332	0.794638	0.240704
Bm1_10835	hypothetical protein		-2.6952	0.409257	0.0950234	0.247078	0.0522804	-0.0522804	-0.118057	-0.327666	3.10446	0.7753
Bm1_10840	hypothetical protein		0.178672	-0.0267304	0.0267304	0.220545	0.0657354	-0.284144	-0.359821	-1.18988	1.41042	0.242029
Bm1_10845	hypothetical protein		-1.13691	0.532925	-0.661243	0.672383	-0.723624	-0.220355	0.748852	0.220355	1.88576	0.116297
Bm1_10850	hypothetical protein	P5	-1.99717	-0.162129	-0.472486	-0.0360604	0.342869	0.0360604	0.179952	0.651725	2.6489	0.00507005
Bm1_10855	hypothetical protein		-0.625336	-0.14542	0.116956	0.123692	-0.0865698	0.0865698	-0.458148	0.253864	0.8792	0.242773
Bm1_10860	hypothetical protein		-2.69065	-0.272373	0.0315841	-0.317538	-0.0315841	0.263357	0.594685	1.04171	3.73236	0.030926
Bm1_10865	MGC79624 protein		-1.18608	-1.18608	0.389039	0.624427	-0.0555482	0.0555482	-0.0850295	0.34365	1.81051	0.61503
Bm1_10870	Zinc finger, C2H2 type family protein	P14	2.46643	2.05383	0.800308	-0.501108	-0.356729	-0.426371	-0.294375	0.294375	2.96754	0.000249466
Bm1_10875	dihydrolipoamide S-acetyltransferase		-0.179395	0.333478	0.23972	-0.0426172	0.342085	-0.0951835	-0.0581229	0.0426172	0.52148	0.777187
Bm1_10880	Histone H2A		0.559731	0.196641	-0.757639	-0.26643	-0.196641	0.311561	0.247667	-0.53258	1.31737	0.623657
Bm1_10885	Hypothetical 48.3 kDa protein in MOB1-SGA1 intergenic region, putative		1.33607	0.210472	-0.0181934	0.45467	0.0181934	-0.617682	-0.339709	-0.842292	2.17836	0.0442583
Bm1_10890	RNA recognition motif domain containing protein		-2.27081	0.414693	0.0288383	-0.153091	0.403258	0.552854	-0.0288383	-0.223459	2.82367	0.563884
Bm1_10895	hypothetical protein	P10	-0.113469	-0.113469	-0.113469	-0.113469	0.113469	3.80744	6.07891	3.65709	6.19238	1.31878e-52
Bm1_10900	hypothetical protein	P11	0	0	0	0	0	0.809835	4.59417	1.53555	4.59417	3.0157e-29
Bm1_10905	cation diffusion facilitator family transporter containing protein	P5	-3.56192	0.249634	-0.94127	0.0575686	0.631549	0.208616	-0.0575686	-0.818944	4.19347	0.000539008
Bm1_10910	SART-1 family protein		0.780367	0.0062821	0.273599	-0.0488773	0.0642411	-0.0062821	-0.162377	-0.0556334	0.942744	0.423726
Bm1_10915	Cyclin-dependent kinases regulatory subunit	P5	-0.550694	1.00682	0.765887	0.589002	0.550694	-0.91926	-1.1668	-0.712953	2.17362	1.70072e-15
Bm1_10920	hypothetical protein		-0.573003	-0.573003	-0.573003	0.129624	-0.129624	0.488121	0.887415	0.606725	1.46042	0.151535
Bm1_10930	hypothetical protein		-2.6729	-0.581836	0.817272	0.585147	0.0915794	0.5657	-0.0915794	-0.151445	3.49017	0.0629785
Bm1_10935	hypothetical protein		-2.24559	0.442426	-0.0481971	-0.197964	0.384188	-0.0551822	0.0481971	0.11032	2.68802	0.826238
Bm1_10940	hypothetical protein		-1.7624	0.328156	0.423759	0.284947	-0.0621522	-0.551325	-0.620638	0.0621522	2.18616	0.424224
Bm1_10945	glyceraldehyde 3-phosphate dehydrogenase		-1.57386	-0.511141	0.177934	-0.696555	-0.115557	0.115557	0.153379	0.684265	2.25813	0.498025
Bm1_10950	Protein kinase domain containing protein		-0.136733	-0.136733	0.353007	0.136733	-0.136733	-0.136733	0.260212	0.255296	0.48974	0.620014
Bm1_10955	hypothetical protein	P10	-1.05946	0.00270041	-0.22096	-0.356945	-0.00270041	1.71435	3.84591	3.76394	4.90537	2.13594e-39
Bm1_10960	hypothetical protein		-3.45405	0.981748	0.517563	-0.0174719	0.0174719	0.133254	-0.0522273	-0.636958	4.4358	0.0312053
Bm1_10965	F-box domain containing protein	P13	0.686432	-0.701693	-0.44901	-0.567083	-0.248863	0.367982	0.248863	0.343949	1.38812	0.0035076
Bm1_10970	14-3-3-like protein 2		-0.728462	0.0699429	0.065239	-0.0866876	0.000147312	0.172334	-0.0297173	-0.000147312	0.900796	0.112999
Bm1_10975	hypothetical protein		0.485154	0.0460363	0.130384	-0.548883	-0.0460363	-0.257579	0.189629	-0.0487859	1.03404	0.17002
Bm1_10980	CPSF A subunit region family protein	P5	-1.19362	0.400228	0.308333	0.18263	-0.152933	-0.0693863	0.0693863	-0.3716	1.59385	0.00574973
Bm1_10990	Hypothetical 90.8 kDa protein T05H10.7 in chromosome II, putative	P11	-0.863966	-0.354517	-0.384373	-0.051477	0.051477	0.0992638	1.23179	0.352992	2.09576	1.55369e-19
Bm1_10995	Conserved oligomeric Golgi complex component 6		0.267342	-0.355428	0.17978	-0.17978	-0.59529	-0.315259	0.260473	0.25687	0.862632	0.457065
Bm1_11000	Conserved oligomeric Golgi complex component 6	P1	-1.91017	-1.0832	-0.402474	0.271484	-0.00564394	0.00564394	0.662859	0.325795	2.57303	0.00100298
Bm1_11005	MGC84665 protein		0.896076	-2.27393	0.160127	-0.559151	-0.499433	-0.160127	0.285324	0.176582	3.17	0.0163953
Bm1_11010	Serologically defined colon cancer antigen 1		-0.401612	-0.760632	0.830964	0.00905669	0.367071	0.125261	-0.00905669	-0.108271	1.5916	0.317876
Bm1_11015	Probable 26S proteasome non-ATPase regulatory subunit 9, putative		-0.13664	-0.13664	-0.13664	0.13664	-0.13664	0.151852	0.226964	0.25242	0.38906	0.853224
Bm1_11030	hypothetical protein		0	0	0	0.274185	0	0.174358	0	0	0.274185	0.872489
Bm1_11050	hypothetical protein		0	0	0.491247	0	0.484599	0	0.197868	0	0.491247	0.583607
Bm1_11055	CUB domain containing protein	P1	-2.73011	-1.06431	-0.667036	-0.0923814	0.0923814	0.817572	0.782876	1.25553	3.98564	1.45453e-05
Bm1_11060	hypothetical protein		-0.90675	-0.122363	0.182391	-0.187737	-0.0747564	0.0747564	0.0756168	0.135729	1.08914	0.717928
Bm1_11065	SAND family protein		0.339838	0.773458	0.204033	0.291282	-0.204033	-0.259147	-0.332465	-0.504905	1.27836	0.0174477
Bm1_11070	Ribosomal Proteins L2, RNA binding domain containing protein		-0.016455	0.0301726	-0.0778013	-0.0723438	-0.178739	0.016455	0.13704	0.0664726	0.315778	0.978952
Bm1_11075	RNA-dependent helicase	P15	1.43981	0.68292	0.127998	-0.127998	0.129903	-0.434081	-0.989446	-0.759918	2.42925	2.8302e-26
Bm1_11080	hypothetical protein		-0.991638	0.253684	0.108973	0.422562	-0.108973	-0.817768	0.168624	-0.769065	1.4142	0.0163407
Bm1_11100	hypothetical protein	P10	-0.677599	-0.677599	-0.677599	-0.403603	0.403603	0.949698	1.28284	1.3807	2.0583	0.00155121
Bm1_11105	recombinant antigen R1, identical		-0.0784836	-0.0784836	0.409078	-0.0784836	-0.0784836	0.0784836	0.628602	0.31478	0.707086	0.398056
Bm1_11115	Cuticle collagen 7 precursor	P9	-3.16389	-2.10171	-2.32551	1.0963	-1.0963	3.88108	5.84622	3.84217	9.01011	6.99256e-131
Bm1_11120	40S ribosomal protein S8	P16	0.0983098	0.739057	0.291738	-0.0290987	0.0290987	-0.535803	-1.26556	-1.70962	2.44868	2.69801e-27
Bm1_11125	DNA replication licensing factor MCM3		-2.50665	0.0675413	0.192135	0.121923	0.303956	-0.0827077	-0.0675413	-0.240042	2.8106	0.0716362
Bm1_11130	hypothetical protein		-1.82592	-1.82592	0.0782065	-0.299916	0.416084	-0.0782065	0.361757	0.512237	2.33815	0.268989
Bm1_11135	hypothetical protein		-1.77487	-0.10838	-0.038041	-0.601379	0.038041	0.499937	1.22129	1.17936	2.99616	0.0116596
Bm1_11170	Leucine Rich Repeat family protein		-0.265978	0.796844	-0.265978	-0.265978	0.153367	0.0444521	-0.0444521	0.441291	1.06282	0.587641
Bm1_11175	hypothetical protein		1.89075	-1.41875	0.158206	-0.118525	0.0497302	-0.366228	0.18069	-0.0497302	3.3095	0.385913
Bm1_11180	uncoordinated protein 1	P4	-2.42583	-1.18054	-1.09292	-0.206877	0.206877	1.613	1.33518	1.16942	4.03883	4.79688e-41
Bm1_11185	Zinc finger, C2H2 type family protein	P14	3.10508	1.27732	0.416245	-0.442727	0.168023	-0.441361	-0.747688	-0.168023	3.85277	0.00272145
Bm1_11190	hypothetical protein	P9	0.636196	0.0956074	-0.641794	-0.111367	-0.605093	-0.0956074	0.75142	0.824266	1.46606	4.22675e-05
Bm1_11195	P40		-0.281515	-0.281515	-0.281515	-0.00724328	0.678158	0.00724328	0.330738	0.122731	0.959673	0.694613
Bm1_11215	hypothetical protein		0	0	0	0	0.71879	0.149427	0	0.407464	0.71879	0.537538
Bm1_11225	Heparan sulfate	P10	-2.05261	-0.990579	-1.21317	-0.329917	0.329917	1.60811	3.53429	2.87373	5.5869	1.1439e-43
Bm1_11230	Alpha-mannosidase C1orf22		0.584215	-1.66277	-0.0121769	-0.186219	-0.421126	0.173408	0.0624739	0.0121769	2.24699	0.521158
Bm1_11235	DNA polymerase alpha subunit B family protein		0.0681352	0.501758	-0.0681352	0.424193	0.199621	-0.0937646	-0.306695	-0.245485	0.808453	0.205766
Bm1_11240	MGC80090 protein		0.616418	0.194277	0.126298	-0.126298	-0.423647	-0.63095	-0.264542	0.283843	1.24737	0.312154
Bm1_11245	hypothetical protein		0	1.06363	0	0	0.68157	0	0	0	1.06363	0.151798
Bm1_11250	Ground-like domain containing protein	P4	-0.590813	-0.590813	-0.111477	0.111477	-0.590813	4.13972	1.92834	1.6613	4.73054	3.76467e-34
Bm1_11255	SNARE domain containing protein		-0.39286	-0.321942	-0.373537	0.0958628	0.285681	0.307567	0.068516	-0.068516	0.700427	0.520288
Bm1_11260	hypothetical protein	P16	0.596139	0.461686	0.245215	-0.126126	0.126126	-0.486245	-0.59312	-0.935843	1.53198	8.87666e-08
Bm1_11265	Single-strand binding protein family protein	P16	0.497107	0.631188	0.0648953	-0.0648953	0.17411	-0.274083	-0.315612	-0.645501	1.27669	8.86553e-06
Bm1_11270	hypothetical protein	P12	0	0	0	0	0	0	1.21625	4.71003	4.71003	4.30287e-34
Bm1_11275	hypothetical protein	P12	-0.476124	0.583892	-0.476124	-0.202045	0.165419	-0.165419	0.725196	1.86096	2.33708	0.00111159
Bm1_11280	GDP-L-fucose synthetase		-0.815635	0.208383	0.160026	0.0350753	0.0435666	-0.0350753	-0.224001	-0.075194	1.02402	0.668039
Bm1_11285	DNA replication licensing factor MCM6 homolog	P5	-0.246567	1.05616	0.42868	0.628203	0.246567	-0.403751	-0.900265	-0.721634	1.95643	3.15516e-13
Bm1_11290	TPR Domain containing protein	P5	-2.78285	-0.691966	-0.70724	0.65306	1.5988	0.772906	-0.155168	0.155168	4.38166	3.35677e-07
Bm1_11300	Zinc finger, C2H2 type family protein		-0.0961666	-0.0961666	-0.0961666	0.178176	0.462468	0.240815	0.0961666	-0.0961666	0.558635	0.83389
Bm1_11305	hypothetical protein	P1	-1.30136	-0.211997	-0.0923882	-0.276289	0.0923882	0.996416	1.22707	1.00475	2.52843	3.11147e-21
Bm1_11310	lipoprotein		2.84627	0.605239	0.0200796	0.244365	-0.23138	-0.0200796	-0.255859	-0.457548	3.30382	0.100474
Bm1_11315	Leucine Rich Repeat family protein		-1.90264	-0.841935	0.968749	0.216732	0.0309581	0.262895	-0.0309581	-0.0783131	2.87138	0.430539
Bm1_11320	Tensin	P9	-1.49157	-0.430745	-1.49157	0.229453	-0.0288486	0.0288486	1.88736	1.10562	3.37893	4.15007e-08
Bm1_11325	110-R orphan receptor	P7	-2.83063	-2.83063	-0.770715	0.396166	0.335925	0.0159456	0.430662	-0.0159456	3.26129	0.00434209
Bm1_11330	hypothetical protein		-0.775929	-0.775929	-0.286376	0.749434	0.815926	0.412682	0.0769448	-0.0769448	1.59186	0.416682
Bm1_11335	MBCTL1		-0.4259	1.24063	0.0670673	0.275119	0.0228047	-0.0939225	-0.196803	-0.0228047	1.66653	0.732485
Bm1_11345	hypothetical protein		-0.199511	-0.199511	-0.199511	-0.199511	0.224892	0.238777	0.749536	0.199511	0.949047	0.327361
Bm1_11350	Protein kinase domain containing protein	P12	-0.967182	-0.967182	0.779556	0.0652985	-0.0652985	-0.184775	0.413545	2.24501	3.21219	3.54793e-06
Bm1_11355	ATP-dependent helicase DDX1		-0.023574	0.023574	0.0336839	0.116946	-0.0395207	0.075785	-0.203055	-0.670606	0.787552	0.147462
Bm1_11360	LIM domain containing protein		-0.159089	0.501084	-0.259326	0.159089	-0.200582	-0.296212	0.48392	0.439795	0.797296	0.287266
Bm1_11365	hypothetical protein	P11	-0.791885	-0.791885	-0.791885	-0.0896432	0.840381	0.0896432	1.31671	1.26336	2.1086	0.000599214
Bm1_11370	hypothetical protein		-1.26736	-0.204959	-0.423579	0.259221	0.104384	-0.104384	0.785542	0.556864	2.0529	0.456512
Bm1_11380	hypothetical protein	P13	-0.345474	-1.56445	-0.49741	-0.879158	0.345474	1.09234	1.46723	0.903064	3.03168	1.15068e-18
Bm1_11385	Flightless-I protein homolog		-0.52428	-0.52428	-0.0482243	0.648099	-0.0778654	0.474816	0.0482243	0.426506	1.17238	0.729267
Bm1_11390	protein C37C3.6a	P5	-1.45606	0.475636	0.457222	0.370025	0.275473	-0.275473	-0.819885	-1.03377	1.9317	6.40045e-08
Bm1_11395	UBA/TS-N domain containing protein		-0.859875	-0.459756	0.182958	-0.00108146	0.108408	0.00108146	0.0476619	-0.255388	1.04283	0.675982
Bm1_11400	Homeobox domain containing protein		-0.488801	1.17773	0.355737	0.0157527	0.613045	-0.0157527	-0.260728	-0.488801	1.66653	0.299878
Bm1_11405	Zinc carboxypeptidase family protein		1.3849	-0.71738	-0.17155	0.215945	-0.534003	0.0854124	-0.0854124	0.300095	2.10228	0.0634097
Bm1_11410	hypothetical protein		0.632383	-0.153524	-0.690289	0.153524	-0.531576	-0.15915	0.315759	0.240896	1.32267	0.588064
Bm1_11415	NADH-ubiquinone oxidoreductase 39 kDa subunit, mitochondrial precursor	P1	-1.90624	-0.0984128	-0.0460141	-0.307011	0.0460141	0.162783	0.827226	0.834083	2.74032	1.42505e-08
Bm1_11420	hypothetical protein	P13	0.944574	-0.280203	-0.687707	-0.15839	-0.0612198	0.0612198	0.403997	1.19427	1.88197	5.15466e-07
Bm1_11425	hypothetical protein		-0.452121	0.354514	0.0558446	-0.244791	-0.0558446	0.156002	-0.242377	0.409809	0.86193	0.606553
Bm1_11430	Protein C20orf142 homolog precursor	P6	-1.60286	0.381653	-1.53018	-0.339942	0.103592	-0.103592	0.420147	0.260168	2.02301	0.000119279
Bm1_11435	hypothetical protein		0.98126	0.87731	0.614511	-0.042107	0.042107	-0.335809	-0.513072	-0.163013	1.49433	0.0107667
Bm1_11440	hypothetical protein		0.399104	0.188012	-0.270234	0.299095	0.0863369	-0.0863369	-0.522349	-0.501547	0.921453	0.512153
Bm1_11445	GDSL-like Lipase/Acylhydrolase family protein	P5	-4.81393	-0.699709	0.146139	0.238305	0.199369	0.337519	-0.146139	-0.853806	5.15145	4.75901e-06
Bm1_11450	chaperonin homolog HSP60, mitochondrial precursor	P16	0.261971	0.575467	0.467994	-0.165363	0.165363	-0.357472	-1.73554	-2.00958	2.58505	1.71873e-27
Bm1_11455	all-trans-13,14-dihydroretinol saturase		-1.33235	0.332397	0.413956	-1.05839	-0.567033	-0.19393	0.264842	0.19393	1.74631	0.170589
Bm1_11460	cytidine deaminase, identical	P8	-3.68059	-3.68059	-2.55034	-0.0129503	0.519811	0.0129503	0.627081	1.22026	4.90084	5.98697e-16
Bm1_11465	T-cell receptor beta chain ANA 11		2.442	0	0	0	0.219689	0	0	0	2.442	0.266898
Bm1_11475	Thrombospondin N-terminal -like domain containing protein		-0.122625	-0.122625	0.721023	-0.122625	0.122625	0.187082	0.272132	-0.122625	0.843648	0.611079
Bm1_11480	Stomatin protein 2		-0.6379	-0.6379	-0.6379	0.661869	-0.0459227	0.0459227	0.74591	0.541939	1.38381	0.201908
Bm1_11485	Nuclear hormone receptor family member nhr-35	P7	-2.69626	-2.69626	-0.507541	-0.72335	0.507541	0.812857	1.1439	0.654275	3.84016	4.06244e-07
Bm1_11490	Cytochrome c oxidase polypeptide Va, mitochondrial precursor, putative		-0.183557	-0.263565	-0.316867	-0.249248	0.215534	0.183557	0.544606	0.614729	0.931596	4.1926e-05
Bm1_11495	Twik (KCNK-like) family of potassium channels, alpha subunit 39A		-0.470539	-0.470539	-0.470539	0.405935	-0.240851	1.00576	0.719299	0.240851	1.4763	0.0522545
Bm1_11515	hypothetical protein		-0.775472	0.285252	0.0683093	-0.271331	0.515989	-0.346771	0.173779	-0.0683093	1.29146	0.687724
Bm1_11520	PHD-finger family protein		-0.141937	-0.0271667	0.173938	0.0271667	0.0727181	0.144523	-0.141752	-0.23772	0.411658	0.7271
Bm1_11525	hypothetical protein	P5	-3.13098	1.30495	0.978014	0.604961	0.193841	-0.193841	-0.249069	-0.875007	4.43593	8.85205e-06
Bm1_11530	ZIP Zinc transporter family protein	P16	-0.2027	0.636298	0.99786	0.2027	0.600235	-0.32471	-1.09679	-1.6193	2.61716	9.29881e-27
Bm1_11535	ubiquitin-conjugating enzyme E2-17 kDa		-0.0204251	0.0204251	0.0875054	-0.312943	0.143329	0.0803716	-0.176612	-0.150843	0.456271	0.509178
Bm1_11545	KOW motif family protein		0.946348	-0.42453	0.00789277	-0.00789277	0.0640676	0.14872	-0.363696	-0.0855072	1.37088	0.659242
Bm1_11550	hypothetical protein		0	0	0	0	0	0.153507	0.19682	0	0.19682	0.911732
Bm1_11555	26S protease regulatory subunit 6A		-0.128959	0.207436	0.234928	0.0225736	-0.0225736	0.0581634	-0.262912	-0.4697	0.704628	0.0398083
Bm1_11560	Ribosomal protein L13 containing protein		-1.01094	0.34908	0.548166	0.404338	0.255419	-0.255419	-0.3499	-0.303907	1.55911	0.0504022
Bm1_11565	39S ribosomal protein L13, mitochondrial		0.420697	-0.205122	-0.0117332	0.0117332	-0.220716	0.273291	-0.0328075	0.0435788	0.641413	0.915365
Bm1_11570	hypothetical protein		-0.601451	0.222756	0.499111	0.0730957	0.140478	-0.535312	-0.0730957	-0.798294	1.2974	0.179241
Bm1_11575	Frataxin-like domain containing protein		-3.57712	0.11858	0.0235944	0.113554	-0.117326	0.128465	-0.0235944	-0.10152	3.70558	0.640902
Bm1_11580	oxidoreductase, zinc-binding dehydrogenase family protein		0.564204	-0.165096	0.150789	0.155959	0.177397	-0.150789	-0.508713	-0.797176	1.36138	0.0117459
Bm1_11585	adenylosuccinate lyase	P16	0.100565	0.863994	0.399303	-0.0305506	0.0305506	-0.600294	-1.03995	-0.693434	1.90394	6.57529e-20
Bm1_11590	Hypothetical 30.1 kDa protein ZC434.4 in chromosome I	P14	1.20102	1.02107	0.0406619	0.420481	-0.0406619	-0.087027	-0.497108	-0.164893	1.69813	0.00167843
Bm1_11595	zrfp1-pending-prov protein		-0.155818	0.454205	-0.0699118	-0.484823	0.184677	-0.0106185	0.0106185	0.434316	0.939028	0.375085
Bm1_11600	hypothetical protein		-0.781642	0.277743	0.07916	-0.07916	-0.520068	0.177917	-0.0971541	0.729041	1.51068	0.64294
Bm1_11605	hypothetical protein		0.730452	-0.45027	0.237725	0.246119	0.101808	-0.150463	-0.295324	-0.101808	1.18072	0.289264
Bm1_11610	Zinc finger, C2H2 type family protein		-2.05369	-0.0658022	0.0813098	0.0298943	-0.105723	0.107534	0.223722	-0.0298943	2.27741	0.566599
Bm1_11620	Protein kinase domain containing protein	P5	-3.65427	0.547009	0.423961	0.292475	0.0952992	-0.406491	-0.714005	-0.0952992	4.20128	0.00219592
Bm1_11625	Hypothetical 24.1 kDa protein C01C10.2 in chromosome X, putative	P6	-2.57746	-0.159142	-0.26272	0.64863	-0.190199	0.159142	1.49628	2.65702	5.23448	2.50661e-19
Bm1_11630	quiescin Q6, isoform b	P9	1.18999	0.410062	-0.778343	0.929823	-1.25643	-0.795087	-0.104022	0.104022	2.44642	0.000288116
Bm1_11640	RhoGAP domain containing protein	P1	-4.14631	-1.04055	0.00462127	-0.321895	0.609084	0.553555	-0.00462127	0.247841	4.75539	0.000443244
Bm1_11645	peptidase family M13 containing protein	P8	-2.25318	-2.25318	-2.25318	-0.134012	0.443742	0.134012	0.782083	0.344597	3.03527	1.09461e-05
Bm1_11650	Vps54 protein		-1.72255	-0.660545	0.340761	-0.690456	0.172294	-0.172294	0.662034	0.437432	2.38458	0.127799
Bm1_11655	hypothetical protein		-1.44858	-1.44858	0.146162	0.272745	0.527283	-0.146162	0.263752	-0.268572	1.97586	0.555073
Bm1_11660	TPR Domain containing protein	P13	-0.764583	-1.54689	-1.02375	-0.0866546	0.132926	0.631766	1.05799	0.0866546	2.60489	7.3316e-06
Bm1_11665	Wnt-4 protein precursor	P14	0.427233	-0.324728	-0.763537	0.0132515	0.427388	0.171832	-0.36969	-0.0132515	1.19092	0.00112703
Bm1_11675	Immunoglobulin domain containing protein	P10	-1.43703	-1.43703	-0.951838	-0.135932	0.135932	1.4356	3.21203	2.77469	4.64906	1.93236e-27
Bm1_11680	hypothetical protein		-1.18909	0.474822	0.184353	0.227894	-0.549759	0.0224211	-0.813181	-0.0224211	1.66392	0.45001
Bm1_11685	Patched related family protein 4	P7	-3.55667	-3.55667	0.0400728	-0.0400728	-0.543909	1.50501	2.10927	0.116561	5.66594	1.13584e-29
Bm1_11690	hypothetical protein		-0.941063	1.15235	0.433126	0.089352	-0.089352	-0.610002	0.223288	-0.550458	2.09342	0.342052
Bm1_11695	G-protein-linked acetylcholine receptor protein 2		-1.17267	-1.17267	-0.328703	-0.000292851	0.000292851	1.25727	0.742971	0.989116	2.42994	0.024599
Bm1_11705	hypothetical protein		-1.17772	-0.1155	0.744254	-0.00560544	0.656859	0.430612	-0.227485	0.00560544	1.92198	0.546972
Bm1_11710	Sestrin		-2.88641	0.0249275	-0.176335	-0.0249275	-0.28795	0.364092	0.534665	0.945865	3.83228	0.0159892
Bm1_11715	Phospholipase c like protein 1, isoform b	P2	-1.14234	-1.14234	-0.0132718	-0.868385	0.0132718	0.83592	1.29723	1.52015	2.66249	5.39804e-05
Bm1_11720	Armadillo/beta-catenin-like repeat family protein		-0.333655	-0.333655	0.144966	-0.060072	0.110247	0.10445	-0.333655	0.060072	0.47862	0.803283
Bm1_11725	GLT25D1 protein		-2.76771	-0.676617	-0.57954	0.134909	-0.134909	0.3331	0.36423	0.487343	3.25506	0.156597
Bm1_11730	Protein kinase domain containing protein		-3.31145	-0.0338364	0.585214	-0.256022	-0.349943	0.0871256	0.124029	0.0338364	3.89667	0.140795
Bm1_11735	hypothetical protein		0	0	0	0	0	0.174358	0	0.390633	0.390633	0.806126
Bm1_11745	hypothetical protein		-0.166175	0.898	-0.166175	-0.166175	-0.166175	0.166175	0.411634	0.237087	1.06417	0.436546
Bm1_11755	cuticle collagen	P3	-0.966694	-0.966694	1.53898	0.333088	-0.966694	2.86359	0.265132	-0.265132	3.83029	4.44534e-17
Bm1_11760	cyclophilin-type peptidyl-prolyl cis-trans isomerase-1, Bmcyp-1 fragment		1.86771	-0.571161	0.767574	0.306904	-0.355242	-0.136488	-0.571161	0.136488	2.43887	0.124428
Bm1_11765	hypothetical protein	P5	-3.47211	-0.160211	3.02845	2.38107	1.91997	0.160211	-0.83333	-0.390708	6.50055	3.55478e-87
Bm1_11770	Zinc finger, C2H2 type family protein		-0.659322	1.00325	0.169175	0.51248	-0.0481483	-0.329206	-0.0570724	0.0481483	1.66257	0.671495
Bm1_11775	Zinc finger, C2H2 type family protein	P7	0	0	1.37284	1.97315	1.07377	0	0	0	1.97315	1.25488e-06
Bm1_11780	Protein-tyrosine phosphatase containing protein		0	0	0	0	0.26248	0	0.19682	0	0.26248	0.855344
Bm1_11790	cAMP-dependent protein kinase catalytic subunit	P13	0.136171	-2.11682	-0.853733	-0.275686	-0.0649964	0.0649964	1.47999	1.66709	3.78391	4.14576e-15
Bm1_11795	RhoGAP domain containing protein		-1.30648	-1.33811	-0.600266	0.228009	-0.219411	0.219411	0.275915	0.287039	1.62515	0.0192
Bm1_11800	protein phosphatase 2A	P6	-3.16652	-0.747317	-1.10344	0.0907109	-0.0907109	0.859871	1.13776	0.789368	4.30428	7.6368e-08
Bm1_11805	small nuclear ribonucleoprotein G	P16	0.360226	0.724613	0.427923	0.0268515	-0.0268515	-0.921914	-1.29881	-1.47524	2.19985	1.78429e-24
Bm1_11810	IBR domain containing protein		-0.258071	0.261474	-0.448436	-0.367588	-0.0143269	0.0143269	0.143996	0.484555	0.932991	0.0657408
Bm1_11815	eukaryotic translation initiation factor 2 subunit 2		-0.126964	0.204429	0.237386	0.200197	-0.0687617	0.0430508	-0.0430508	-0.207658	0.445044	0.599526
Bm1_11820	hypothetical protein		-1.79075	0.300145	0.397991	0.0195687	0.280895	-0.0195687	-0.107543	-0.617023	2.18874	0.731607
Bm1_11825	hypothetical protein	P2	-2.65963	-0.56768	2.78365	-0.764322	1.71028	1.61298	0.56768	-0.598845	5.44328	4.30084e-22
Bm1_11830	WW domain containing protein	P1	-3.37043	-1.70337	-1.18242	-0.467605	0.467605	0.612998	1.12271	1.28373	4.65416	5.54341e-13
Bm1_11835	Protein kinase domain containing protein		-0.413312	0.161215	0.339405	-0.0221462	-0.0173338	0.0173338	-0.33687	0.314015	0.752717	0.655762
Bm1_11840	hypothetical protein	P6	-0.348243	0.3141	-0.13381	-0.178248	-0.116683	0.116683	0.539272	1.05163	1.39987	2.22645e-09
Bm1_11845	oxidative-stress responsive 1		-0.87117	-0.356462	0.311926	0.00828706	0.308585	-0.00828706	-0.0265765	0.0462883	1.1831	0.455382
Bm1_11850	TRAF4-associated factor 2		0.783595	-0.106827	0.192409	0.115332	0.106827	-0.154272	-0.549211	-0.465412	1.33281	0.748722
Bm1_11855	hypothetical protein	P15	0.823942	0.396905	0.318842	0.305282	-0.305282	-0.546534	-0.870608	-1.04784	1.87179	0.000176025
Bm1_11860	hypothetical protein		-1.25813	0.0698854	-0.559009	-0.0355315	0.117106	0.00774954	-0.00774954	0.166264	1.42439	0.371692
Bm1_11865	Nematode cuticle collagen N-terminal domain containing protein	P12	-0.381275	-0.381275	-0.381275	-0.381275	0.381275	0.727264	2.06099	3.14626	3.52754	1.56019e-12
Bm1_11870	Peptidase family M3 containing protein		0.388767	0.0693437	-0.0693437	0.187884	0.209934	-0.141775	-0.187796	-0.592201	0.980969	0.709109
Bm1_11875	Mov34/MPN/PAD-1 family protein		-0.279749	0.0568277	-0.00426065	0.361919	0.254123	0.00426065	-0.398946	-0.417374	0.779293	0.0935625
Bm1_11880	40S ribosomal protein S3	P15	0.577907	0.395926	0.165394	-0.165394	0.1751	-0.324558	-1.35703	-1.73531	2.31322	1.25675e-31
Bm1_11890	hypothetical protein	P15	1.0768	0.151599	-0.0833226	0.170795	0.0833226	-0.315711	-0.878759	-0.408587	1.95556	8.09413e-06
Bm1_11895	hypothetical protein		-0.659358	0.400115	-0.184793	-0.154849	-0.0481037	0.0785032	0.388315	0.0481037	1.05947	0.962421
Bm1_11900	cell division cycle protein 20 homolog (p55CDC)	P5	-3.73912	0.961823	0.0392825	0.642725	0.36965	-0.0392825	-0.162	-0.390831	4.70094	0.00064217
Bm1_11905	hypothetical protein		0.125127	-0.195444	0.0359796	-0.0359796	-0.280322	-0.0694954	0.630355	0.609064	0.910676	0.0333762
Bm1_11910	hypothetical protein		0	0	0	0.503799	0	0.292753	0.197947	0	0.503799	0.720919
Bm1_11915	Caspase recruitment domain containing protein		1.33084	0.976028	0.0132459	0.78086	-0.0132459	-0.141002	-0.18679	-1.11405	2.44489	0.0842
Bm1_11920	hypothetical protein	P8	-1.79408	-1.79408	-0.942577	0.745	0.862869	0.219692	-0.219692	1.19965	2.99373	0.00178496
Bm1_11925	Viral A-type inclusion protein repeat containing protein		0.0284308	-0.122066	0.0376275	-0.0284308	-0.169265	0.141469	-0.0597244	0.0394836	0.310735	0.909115
Bm1_11930	hypothetical protein	P5	-0.704093	0.27485	0.959752	0.667572	0.267954	-0.267954	-0.993116	-0.991281	1.95287	2.58315e-06
Bm1_11940	hypothetical protein		0.203572	-1.18416	-0.0496939	-0.0587603	0.0185663	-0.0185663	0.174978	0.195251	1.38773	0.904609
Bm1_11945	hypothetical protein		-2.39863	1.03293	0.0252194	0.376651	-0.0252194	-0.381239	-0.443489	0.336235	3.43156	0.186599
Bm1_11950	hypothetical protein		0.226078	0.191062	0.277465	0.0463499	-0.244094	-0.227703	-0.0463499	-0.274368	0.551832	0.803635
Bm1_11955	trafficking protein particle complex 5		-0.495889	-0.0353516	0.215003	0.69537	0.022823	0.469161	-0.022823	-0.689531	1.3849	0.10516
Bm1_11960	DNA polymerase I family protein		0.605343	-0.0192773	0.134937	0.0843775	0.0192773	-0.283987	-0.418973	-0.782837	1.38818	0.263861
Bm1_11965	Serine/threonine-protein kinase C05D10.2 in chromosome III, putative		-0.820754	-0.820754	0.0125727	-0.546708	0.352776	-0.0125727	0.126098	0.138684	1.17353	0.707897
Bm1_11980	hypothetical protein		-0.248427	-0.248427	0.228438	0.0256319	0.364254	-0.0771954	-0.0256319	0.152104	0.612681	0.922081
Bm1_11985	eukaryotic translation initiation factor 3 subunit 6	P15	0.177082	0.184279	0.178321	0.0437751	-0.0437751	-0.545776	-1.19029	-1.36029	1.54457	3.43363e-16
Bm1_12000	Leucine Rich Repeat family protein		-0.453069	-0.856901	0.175191	-0.418263	0.247698	-0.175191	0.356692	0.762038	1.61894	0.0367882
Bm1_12005	RNA binding protein	P16	0.237252	0.462578	0.193395	-0.0521717	0.0521717	-0.326864	-0.690827	-0.303336	1.1534	0.000607945
Bm1_12010	vacuolar ATP synthase subunit B		0.195185	-0.319645	-0.00176723	0.0241834	0.00176723	-0.0917749	0.0276677	-0.496302	0.691487	0.173545
Bm1_12015	MGC83759 protein		-0.200131	0.0353053	0.0631569	0.21272	-0.0353053	-0.418682	-1.20833	0.0945607	1.42105	0.0918407
Bm1_12020	Smr domain containing protein		0.149096	-0.0316451	-0.320062	0.310678	-0.144123	-0.0562286	0.137888	0.0316451	0.63074	0.639345
Bm1_12025	Bromodomain associated family protein		-0.499349	-0.260273	0.594982	-0.00448299	0.00820042	-0.127485	0.00448299	0.0517169	1.09433	0.876249
Bm1_12030	Variant SH3 domain containing protein		-0.369856	0.262215	0.112879	0.269986	-0.0785352	0.0313679	-0.0313679	-0.13763	0.639842	0.821856
Bm1_12035	Cyclin, N-terminal domain containing protein	P5	-4.43963	-0.628565	0.287445	0.489435	0.91098	0.98236	-0.287445	-0.28776	5.42199	4.04525e-12
Bm1_12040	hypothetical protein	P16	0.0102187	0.540578	0.301898	0.00109973	-0.00109973	-0.182204	-0.456107	-1.01577	1.55635	0.000126954
Bm1_12050	Ubl3 protein	P7	-2.47999	-2.47999	-0.559403	-0.293682	0.293682	1.37825	1.96778	2.72439	5.20437	1.95979e-26
Bm1_12055	aspartic protease BmAsp-2, identical	P5	-4.23851	-2.25294	-1.29801	0.0319045	0.87889	0.767284	0.117091	-0.0319045	5.1174	4.20562e-38
Bm1_12060	hypothetical protein	P1	-4.20583	-1.29555	-0.244787	0.0233247	-0.0233247	0.265393	0.497907	0.305394	4.70374	0.00187579
Bm1_12065	Cytochrome b5-like Heme/Steroid binding domain containing protein	P9	-0.350522	-0.460243	-0.24106	0.165024	-0.165024	0.251254	0.561937	0.571273	1.03152	0.00224958
Bm1_12070	Voltage-gated potassium channel, Shal-family (KCND, Kv4-like) alpha-subunit. C. elegans shl-1 ortholog	P9	-1.96422	-1.96422	-1.12354	0.222376	-0.222376	0.649446	2.17965	1.80369	4.14388	1.57931e-18
Bm1_12075	hypothetical protein	P11	0	0	0	0	0	0	1.35803	0.397719	1.35803	0.000505725
Bm1_12080	hypothetical protein		0	0	0	1.16986	0.390725	0.149353	0	0	1.16986	0.185828
Bm1_12090	hypothetical protein		-0.53299	-0.53299	-0.0410439	0.344796	0.0410439	0.357467	-0.163944	0.425085	0.958075	0.873807
Bm1_12095	CES-1		2.90472	1.25074	-0.41885	-0.41885	-0.195429	0.0177794	0.131063	-0.0177794	3.32357	0.0267418
Bm1_12105	hypothetical protein		0	0	0	0	0	0.309731	0.694407	0.707106	0.707106	0.256021
Bm1_12110	DnaJ protein		0.333466	0.298757	0.278627	-0.270504	-0.0469037	0.0469037	-0.559928	-0.344873	0.893394	0.0111538
Bm1_12115	SNARE domain containing protein		-0.0742966	0.0896292	-0.249235	0.144319	-0.118297	0.0742966	-0.154156	0.248057	0.497292	0.671516
Bm1_12120	alpha-tubulin	P5	-1.85275	1.05729	1.23006	1.23828	0.0250451	-0.231035	-0.316889	-0.0250451	3.09103	0.00130608
Bm1_12125	hypothetical protein	P10	0	0	0	0	0	0.771852	1.77672	2.15234	2.15234	2.94622e-06
Bm1_12130	ubiquitin		-0.261134	0.393125	0.771067	0.605627	-0.00856886	0.00856886	-0.0411099	-0.283603	1.05467	0.397538
Bm1_12135	vacuolar ATP synthase subunit G		-0.0683373	0.0262016	0.16873	0.0970357	0.0346952	-0.0262016	-0.195512	-0.278903	0.447633	0.565975
Bm1_12140	hypothetical protein		-0.742468	-0.0992206	0.00714026	0.160412	-0.00714026	0.195502	0.221555	-0.130922	0.964023	0.502499
Bm1_12145	CG8793-PA		-1.85001	-0.789428	0.207594	0.122628	-0.0751396	0.0751396	-0.0922593	0.667483	2.51749	0.724917
Bm1_12150	Chloride intracellular channel exc-4 (Excretory canal abnormal protein4)		0.620178	-0.000509953	0.104494	0.000509953	-0.267775	-0.255387	-0.430762	0.124165	1.05094	0.340157
Bm1_12160	ABTAP		0.27061	0.187533	-0.00261985	-0.338805	0.00261985	-0.192341	-0.201614	0.0895149	0.609415	0.798336
Bm1_12165	methionyl-tRNA synthetase	P15	0.306072	0.127037	0.10705	0.0381078	-0.0381078	-0.130035	-0.798522	-1.14107	1.44714	4.46358e-07
Bm1_12170	Protein-tyrosine phosphatase containing protein		0	1.06374	0	0.274164	0	0	0	0.390953	1.06374	0.400982
Bm1_12175	hypothetical protein		0.14459	0.608647	0.217509	-0.25624	0.118266	-0.118266	-0.12657	-0.933986	1.54263	0.569104
Bm1_12180	Protein C20orf22	P5	-0.976573	0.420716	-0.0432627	0.0432627	0.360087	0.740269	-0.350375	-0.650679	1.71684	2.70698e-06
Bm1_12185	hypothetical protein		0.0179356	0.0867145	-0.0179356	0.176816	0.11633	-0.162765	-0.226803	-0.499057	0.675873	0.115722
Bm1_12190	Calcium/calmodulin-dependent serine/threonine-protein kinase, putative	P10	-0.699721	-0.699721	-0.219219	-0.425841	0.219219	1.23907	1.50476	0.983444	2.20448	0.000225732
Bm1_12195	hypothetical protein		-1.47242	-1.47242	0.0999725	-0.299835	0.255516	0.239084	0.6159	-0.0999725	2.08832	0.330296
Bm1_12200	HMG box family protein		0.094816	-0.307743	0.117447	0.582368	-0.36358	-0.53986	0.019451	-0.019451	1.12223	0.262226
Bm1_12205	hypothetical protein		-0.524504	0.540916	0.295902	-0.0217359	-0.524504	0.0217359	-0.164118	0.977906	1.50241	0.306486
Bm1_12210	mRNA capping enzyme, C-terminal domain containing protein		-0.12006	-1.01137	-0.0867001	0.394375	-0.21225	0.0867001	0.319309	0.441239	1.45261	0.230735
Bm1_12215	Matrixin family protein		-1.42687	0.992371	-0.0538019	0.467551	1.1473	-0.0107599	0.0107599	-0.461516	2.57417	0.098723
Bm1_12220	hypothetical protein		-0.300793	0.76205	0.18736	-0.300793	0.144327	-0.144327	0.268794	-0.300793	1.06284	0.524722
Bm1_12225	G-patch domain containing protein		0.282025	0.119738	-0.0423839	-0.228162	-0.110851	-0.0236027	0.0236027	0.129674	0.510187	0.878
Bm1_12230	Protein kinase domain containing protein		0.0204672	-0.244373	0.134229	-0.0204672	0.0366545	0.0242699	-0.279957	-0.277279	0.414186	0.58376
Bm1_12235	Probable NADH-ubiquinone oxidoreductase 13 kDa-A subunit,mitochondrial precursor	P6	-2.00697	-0.0224762	-0.0298187	0.0224762	0.154618	-0.13859	0.81868	0.965329	2.9723	0.000113176
Bm1_12245	hypothetical protein	P13	1.14009	-1.11453	-1.32727	-0.649621	-0.512461	0.512461	2.17851	2.27199	3.59926	1.01774e-22
Bm1_12255	hypothetical protein		0	0	0	0	0.4095	0	0	0.402311	0.4095	0.524262
Bm1_12265	hypothetical protein		0	0	0	0	0	0	0	0.958174	0.958174	0.132425
Bm1_12270	hypothetical protein	P12	0	0	0	0	0	0	0.218254	3.05424	3.05424	4.78105e-15
Bm1_12275	hypothetical protein	P12	0	0	0	0	0.415153	0	0.852833	2.50644	2.50644	7.01576e-07
Bm1_12280	hypothetical protein		-3.00951	-0.918495	0.0806465	0.0813945	0.105302	0.340639	-0.0806465	-0.341006	3.35015	0.359406
Bm1_12285	hypothetical protein	P11	-0.252288	0.80989	-0.252288	0.0216259	-0.0216259	-0.0851836	1.85763	0.71209	2.10992	5.25237e-06
Bm1_12290	hypothetical protein		-1.14269	-0.0796969	-1.14269	0.158258	-0.329224	0.0796969	0.178984	0.798971	1.94166	0.229438
Bm1_12295	NDRG3 protein	P11	-0.00273919	-0.208181	-0.0316791	0.176209	-0.29595	0.00273919	0.761011	1.15709	1.45304	0.000284296
Bm1_12300	Fibronectin type III domain containing protein		-2.09115	1.18712	-0.0223171	0.497484	0.897213	0.0223171	-0.208243	-0.27335	3.27827	0.0269479
Bm1_12305	hypothetical protein	P10	-0.54327	-0.54327	-0.54327	-0.269763	0.269763	2.33309	2.84833	2.46593	3.3916	7.75505e-12
Bm1_12310	Probable exocyst complex component Sec15		0.498417	0.2358	-0.223192	0.070802	-0.12255	0.0263203	-0.0263203	-0.181246	0.72161	0.863393
Bm1_12315	Mitochondrial carrier protein	P10	-0.155204	0.199961	-0.449435	-0.807225	-0.300358	0.155204	0.550863	0.200424	1.35809	0.000150866
Bm1_12325	Tubulin beta chain		-1.36375	-1.36375	-0.524618	0.263333	0.597484	0.291209	-0.00586331	0.00586331	1.96123	0.381696
Bm1_12330	hypothetical protein		-0.223881	-0.223881	0.250775	0.280622	-0.00298419	0.0872166	0.00298419	-0.223881	0.504503	0.922049
Bm1_12335	Zinc finger, C2H2 type family protein		0.980882	0.617579	0.279629	-0.595721	-0.838608	-0.896771	-0.214197	0.214197	1.87765	0.131803
[truncated: 8,244 more rows]

## Sheet: 2b
Gene ID	Description	Cluster	Day 0	Day 1	Day 2	Day 3	Day 4	Day 5	Day 6	Day 7	Day 8	Range	FDR
AAEL000001	bystin	H13	0.437942	-0.871146	-0.324681	-0.0994202	0.188299	-0.00382135	-0.0465743	-0.0218976	0.00382135	1.30909	1.03e-06
AAEL000002	hypothetical protein		-0.464936	-0.225916	0.520753	0.49038	0.363081	0.526614	0.527759	-0.194992	-0.191316	0.992695	0.58803
AAEL000003	conserved hypothetical protein	H1	-1.02115	-0.735926	0.168193	0.442479	0.493138	0.533056	0.477868	-0.0156742	-0.14522	1.55421	2.65e-13
AAEL000004	glycosyltransferase	H13	0.636834	-0.652755	-0.342568	0.135009	0.396917	0.209706	0.027443	0.156197	0.380978	1.28959	2.09e-05
AAEL000005	hypothetical protein		0.110022	0.321085	-0.0429093	0.0961323	0.00110633	-0.00110633	-0.02721	-0.203914	-0.234675	0.55576	0.73422
AAEL000006	phosphoenolpyruvate carboxykinase	H4	-0.421397	3.68385	0.516058	-1.18286	-0.513895	-0.243582	-0.611545	0.0669473	0.450551	4.8667	1.56e-137
AAEL000008	WD and tetratricopeptide repeat protein		-0.0705199	0.681541	-0.0836504	-0.0446641	-0.00628615	0.00876805	-0.0227722	-0.0976125	0.100206	0.779153	0.000326775
AAEL000010	ribosomal protein L36, putative		0.440718	0.0966087	-0.409835	-0.334425	-0.127342	0.314458	0.132594	0.23285	-0.0636774	0.850554	0.0142933
AAEL000013	peptidyl-prolyl cis-trans isomerase (cyclophilin)		0.0318897	-0.0837345	-0.217852	-0.0318897	0.132227	0.173318	0.195406	-0.0343655	0.0717798	0.413257	0.809739
AAEL000014	cyclic-nucleotide-gated cation channel		-0.290489	0.201272	-0.418296	0.498317	0.108	0.590537	0.120695	-0.108	-0.276379	1.00883	0.799006
AAEL000015	PHD finger transcription factor		-0.151476	0.202709	-0.15949	-0.0610502	-0.0233491	-0.067385	0.120367	0.126864	0.0556822	0.362199	0.691139
AAEL000016	UPF0483 protein AAEL000016	H13	0.440366	-0.728013	-0.410289	-0.217845	0.0743996	0.283562	0.210915	0.240441	0.172124	1.16838	4.68e-07
AAEL000019	conserved hypothetical protein	H7	-0.0941567	-1.19684	0.108252	0.349306	0.055214	0.429627	0.302052	0.381405	0.886049	2.08289	9.84e-07
AAEL000020	conserved hypothetical protein		-0.109784	-0.243947	-0.0864752	-0.00785234	0.0194644	0.0798641	-0.00122514	-0.0672127	0.0397017	0.323811	0.93977
AAEL000021	conserved hypothetical protein	H3	1.08954	3.06424	-0.419144	0.463959	-0.00167019	-0.762278	-0.779235	-1.09003	-0.517583	4.15427	6.05e-21
AAEL000022	conserved hypothetical protein		-0.31949	-0.290796	-0.0186018	-0.127104	0.113434	0.127018	0.153429	0.259455	0.276516	0.596006	0.163332
AAEL000024	dopachrome-conversion enzyme (DCE), putative		-0.393195	-0.428363	0.452731	0.117385	-0.13246	-0.0268873	0.360539	-0.0953134	-0.0525099	0.881094	0.00180941
AAEL000025	phosphoenolpyruvate carboxykinase	H4	-0.386626	4.27992	0.806273	0.0137593	0.169079	-0.461142	-0.471212	0.111739	-0.0137593	4.75113	4.27e-99
AAEL000026	dynein light chain, putative		-0.294218	0.221422	-0.204796	0.0448505	0.197437	0.181682	0.199137	0.0441441	-0.313718	0.53514	0.65413
AAEL000028	Clip-domain serine protease, family B		-0.0935367	0.227369	-0.282068	0.00107204	-0.361111	-0.0748186	0.17206	0.0740069	0.498923	0.860034	0.00110897
AAEL000030	Clip-domain serine protease, putative		0.310344	0.761385	-0.125918	0.157213	-0.216123	-0.0758325	0.00161371	-0.135252	0.0671483	0.977508	1.48e-05
AAEL000032	40S ribosomal protein S6	H10	0.295523	-0.0128731	-0.735485	-0.373811	-0.275532	0.138774	0.0342878	0.069543	-0.200966	1.03101	0.00963258
AAEL000033	conserved hypothetical protein		-0.0555871	-0.508258	0.0842003	0.152924	0.143446	0.139196	0.0675953	0.108455	0.103686	0.661182	0.642714
AAEL000034	meiotic recombination repair protein 11 (mre11)		-0.394435	-0.414039	0.048653	-0.106309	0.168916	0.160826	0.258843	0.230272	0.107011	0.672883	0.61077
AAEL000035	odorant-binding protein 56e, putative		-0.856391	-0.837659	0.00908224	-0.752314	0.260257	0.374138	0.0372779	0.462193	-0.00340603	1.31858	0.115132
AAEL000037	Clip-domain serine protease, family B	H11	-0.139644	-0.284304	-0.181747	-0.0574421	-0.31718	0.0619037	0.65481	0.329629	0.975763	1.29294	4.37e-13
AAEL000038	Clip-domain serine protease, family B		-0.0359765	-0.0799317	-0.247031	-0.126258	-0.111229	0.0359765	0.218609	0.102997	-0.051982	0.46564	0.664214
AAEL000040	elastase, putative	H3	0.206595	0.933172	-0.29161	0.120072	-0.129225	-0.266415	-0.319187	-0.174015	-0.0985989	1.25236	4.03e-09
AAEL000042	conserved hypothetical protein		-0.242882	-0.960173	-0.498269	0.00942085	-0.176612	0.0598689	0.257638	-0.00942085	0.246362	1.21781	0.0463658
AAEL000044	ornithine decarboxylase	H6	-0.167981	-1.12486	1.27484	0.348059	-0.164381	-0.392454	0.0160758	0.0341453	0.49753	2.3997	1.94e-28
AAEL000045	NMDA receptor glutamate-binding chain		-0.0579246	0.49521	-0.368801	-0.314052	0.320213	0.246769	-0.168612	-0.401564	0.110574	0.896774	0.469503
AAEL000046	conserved hypothetical protein	H13	0.433637	-1.45118	-0.510601	0.109853	-0.290565	0.207063	-0.0271768	-0.508361	-0.132699	1.88481	0.00307247
AAEL000049	three prime repair exonuclease 1, putative	H3	0.158875	1.25087	-0.116262	-0.329676	0.0738721	-0.0593895	0.224419	0.30522	0.756029	1.58055	1.35e-11
AAEL000050	conserved hypothetical protein		-0.328624	0.417698	-0.083939	-0.126412	-0.0316633	-0.00628544	0.00628544	0.0102777	0.212191	0.746322	0.357458
AAEL000053	myotubularin		-0.912487	-0.178892	0.558032	0.643384	-0.0320549	-0.359487	0.0320549	0.227385	-0.166861	1.55587	0.45451
AAEL000054	mixed-lineage leukemia protein, mll		-0.0466092	-0.313392	-0.132817	0.0509209	-0.0004508	-0.126868	0.0899981	0.0004508	-0.0153248	0.40339	0.918031
AAEL000055	conserved hypothetical protein	H4	-0.376271	1.46933	0.0557356	-0.132593	-0.0561197	-0.01218	0.134125	0.0129166	0.320786	1.8456	7.1e-26
AAEL000057	Toll-likeReceptor.		0.773984	0.747508	0.278193	0.213098	0.256582	-0.905534	-0.838199	-0.0878439	-0.0269149	1.67952	0.0549734
AAEL000059	Clip-domain serine protease, family B. Protease homologue.	H7	-0.164904	-1.61969	0.0170657	-0.121077	0.0646842	0.102362	0.581364	0.385197	1.04735	2.66704	4.08e-32
AAEL000062	adenylate cyclase	H7	-0.0329247	-0.282422	0.879843	1.39797	0.831614	0.248473	-0.0682235	0.0922749	-0.137963	1.68039	4.12e-19
AAEL000064	dopachrome-conversion enzyme (DCE) isoenzyme, putative		0.416823	-0.368104	-0.000234056	-0.00335893	0.000234056	0.164471	0.364497	0.297194	0.535311	0.903415	0.00447313
AAEL000065	conserved hypothetical protein		-0.692639	0.145561	-0.0151792	0.101811	0.205006	-0.203537	0.00194927	-0.00194927	-0.0510174	0.897644	0.772324
AAEL000068	ribosomal protein S25, putative		0.0256809	0.313818	-0.590491	-0.264084	-0.280926	0.317025	0.103962	0.0895	-0.22618	0.907516	8.06e-05
AAEL000070	conserved hypothetical protein		0.425415	0.0169736	-0.0244005	-0.0189508	-0.0169736	0.136121	0.459683	0.209433	0.415472	0.484083	0.330527
AAEL000072	hypothetical protein		0.870627	0.923492	0.017372	-0.00327679	0.00327679	0.0056886	-0.354721	-0.395448	-0.278064	1.31894	0.101723
AAEL000074	Clip-domain serine protease, family B.	H11	0.0265012	-0.27787	-0.296942	-0.239622	-0.29576	0.0470501	0.427751	0.334056	0.724887	1.02183	1.01e-08
AAEL000077	cation efflux protein/ zinc transporter		-0.170805	-0.0962683	-0.0261048	0.0332772	0.0639106	0.106545	0.137187	0.269115	0.412783	0.583588	0.167881
AAEL000079	hypothetical protein		0	0.0465656	0.183542	0.438308	-0.0424817	-0.295775	-0.249687	-0.253669	-0.768218	1.20653	0.100542
AAEL000080	phosphoenolpyruvate carboxykinase	H4	-1.10757	3.4786	0.501382	-0.0653383	0.176492	0.0653383	0.130581	0.479244	0.365584	4.58617	5.83e-177
AAEL000081	peroxisome assembly factor-2 (peroxisomal-type ATPase 1)		-0.195376	-0.718924	-0.289075	0.102921	0.0691616	0.0245665	-0.0100841	-0.051197	0.0156093	0.821845	0.00291693
AAEL000083	conserved hypothetical protein		-0.158278	0.26082	0.128862	0.861777	0.000449051	-0.29451	0.0372258	-0.000449051	0.154822	1.15629	0.744669
AAEL000084	elongin b		-0.3357	0.234617	0.222343	0.0152985	-0.270324	-0.0208162	-0.021052	-0.0429313	0.21852	0.570317	0.144591
AAEL000086	Clip-domain serine protease, family B.		-0.170921	-0.612945	0.875384	0.167043	-0.00869066	-0.203575	0.431985	0.658872	0.606849	1.48833	0.0394497
AAEL000087	macroglobulin/complement	H10	0.434184	0.908593	-0.796251	-0.673055	-0.626475	-0.0681876	0.635513	0.739902	1.01458	1.81083	1.01e-23
AAEL000088	brefeldin A-sensitive peripheral Golgi protein, putative		-0.337644	0.0414243	-0.00940999	-0.0437658	0.00940999	-0.0559223	0.045011	-0.177771	0.178056	0.5157	0.897125
AAEL000090	secretory carrier-associated membrane protein (scamp)		-0.428457	0.174456	-0.340584	-0.18125	0.0027861	-0.0027861	0.101131	0.0882713	0.319224	0.747681	0.0163141
AAEL000091	sumo-1-activating enzyme E1a	H1	-0.521705	-0.208607	-0.00646022	0.00646022	0.221842	0.369323	0.539401	0.44724	0.602353	1.12406	7.3e-05
AAEL000092	glutathionetransferase	H8	0.723119	-0.211066	0.377161	-0.709507	-0.731579	0.0507657	-0.0507657	0.824015	0.909219	1.6408	0.00739912
AAEL000093	conserved hypothetical protein		0.199274	0.299644	-0.197867	-0.151858	-0.180879	-0.121045	-0.0179118	0.0171747	0.254498	0.497511	0.110754
AAEL000094	hypothetical protein		0.764966	0.750038	0.219857	0.332234	-0.117914	-0.114027	-0.171935	-0.256716	-0.451873	1.21684	0.0520489
AAEL000096	conserved hypothetical protein		0.294585	0.446618	-0.363888	-0.0279752	-0.265277	0.103878	0.489859	0.0279752	0.812938	1.17683	0.517309
AAEL000097	n-acetylneuraminate synthetase		-0.368858	0.460526	-0.0889771	0.129519	0.410557	0.419942	-0.0678648	-0.62893	0.77496	1.40389	0.413713
AAEL000099	Clip-domain serine protease, family B.		0.310051	0.367597	0.10843	-0.0225492	-0.165485	-0.00985049	0.319872	0.169385	0.638189	0.803674	0.000731465
AAEL000100	hypothetical protein		-1.30574	-0.131864	0.88237	0.555149	0.619909	0.637749	0.688798	0.0806342	0.0743076	2.18811	0.349245
AAEL000101	AMP dependent coa ligase	H3	-0.080766	1.92838	0.21167	0.150689	-0.265925	-0.374453	-0.609749	-0.251907	-1.0407	2.96908	2.91e-69
AAEL000102	conserved hypothetical protein	H9	-1.3392	-0.27326	-0.384818	0.0763203	0.206361	0.541428	0.619731	0.42226	0.779794	2.11899	9.47e-14
AAEL000103	conserved hypothetical protein		-0.404441	0.0830209	-0.0755638	-0.207133	-0.306879	-0.0594955	-0.123951	0.249837	-0.10516	0.654278	0.979261
AAEL000105	beta-alanine synthase, putative	H4	0.337295	1.79187	0.901855	-0.0374603	-0.27081	-0.181104	-0.353263	-0.0320891	-0.419482	2.21135	1.71e-42
AAEL000106	conserved hypothetical protein		0.445001	0.107416	0.263884	-0.149937	0.0135529	0.111253	-0.0233845	0.36356	0.134841	0.594938	0.716353
AAEL000107	hypothetical protein		-0.111992	-0.150081	-0.200531	-0.0463398	0.421966	0.268683	0.0344023	-0.0111747	-0.147395	0.622497	0.369685
AAEL000109	Enolase-phosphatase E1 (EC 3.1.3.77)(2,3-diketo-5-methylthio-1-phosphopentane phosphatase)		-0.754535	0.0198085	0.242378	0.368988	0.229813	0.0438157	0.00328018	0.0455004	0.156157	1.12352	0.016081
AAEL000110	conserved hypothetical protein		0.0821618	0.220398	0.0956792	-0.186347	-0.141645	0.0063603	-0.03655	0.182737	-0.217282	0.43768	0.94453
AAEL000111	nitrilase, putative	H6	-0.0990742	-0.451069	1.35991	0.57372	0.089451	-0.00783623	-0.077198	-0.0505528	0.00783623	1.81098	1.02e-20
AAEL000115	conserved hypothetical protein		0.293475	-0.886903	0.175065	-0.0830872	-0.212289	0.154239	-0.0368451	0.282824	-0.0248427	1.18038	0.0413346
AAEL000116	conserved hypothetical protein		-0.301997	-0.152184	0.111045	0.181916	0.29696	0.239489	0.0737104	0.0154798	0.189261	0.598957	0.870292
AAEL000118	cleavage and polyadenylation specificity factor		-0.740388	-0.550815	-0.255672	0.0745962	0.00051359	0.00837566	0.10615	-0.122396	0.0133641	0.846538	0.0280004
AAEL000119	AMP dependent coa ligase		-0.253118	0.505856	0.474296	0.022342	-0.0593829	-0.258025	-0.21207	0.00693895	-0.0315335	0.763882	0.000968839
AAEL000121	dihydropyridine-sensitive l-type calcium channel		-0.0336011	-0.0434467	-0.0303623	0.0467519	0.123841	0.209822	-0.107807	0.0507196	-0.104717	0.317629	0.996809
AAEL000122	conserved hypothetical protein		-0.282483	-0.109148	0.228341	0.0884916	0.0858534	0.0795558	0.130723	-0.0134079	0.0134079	0.510824	0.981445
AAEL000124	conserved hypothetical protein		-0.207035	0.327475	-0.463538	-0.173333	-0.490228	0.0511241	0.118594	0.462007	-0.629872	1.09188	0.0464459
AAEL000126	molybdopterin cofactor synthesis protein a		0.0640235	-0.513796	0.110322	-0.110392	-0.0675106	0.0194485	0.108673	0.164714	0.0613196	0.67851	0.0634953
AAEL000127	AMP dependent coa ligase		0.383534	-0.949792	0.0146859	0.0446953	-0.129541	-0.156174	-0.310906	-0.184629	-0.0146859	1.33333	0.20838
AAEL000128	P130		-0.316043	0.168808	0.0215332	0.291749	0.116965	0.247624	0.406626	0.428913	0.55258	0.868623	0.00950623
AAEL000129	hypothetical protein		0.509145	0.25285	-0.0470735	0.360436	-0.0222515	-0.0239798	0.476527	-0.194277	-0.270207	0.779352	0.963605
AAEL000134	conserved hypothetical protein		-0.434654	0.283891	-0.232217	-0.148506	0.0873956	-0.0672158	0.0672158	-0.186182	-0.28697	0.718545	0.612809
AAEL000135	sterol desaturase	H4	0.071528	1.21039	0.369536	0.149831	-0.576207	-0.264181	-0.491252	0.0552501	-0.0329206	1.7866	0.00209649
AAEL000136	conserved hypothetical protein		0.0551307	-0.217504	0.0177785	0.0771678	-0.000430425	0.0031516	-0.288419	-0.167962	-0.298776	0.375944	0.911751
AAEL000137	conserved hypothetical protein		0.116122	-0.593556	-0.491772	-0.383013	-0.0372791	0.103113	0.0251378	-0.0131402	0.286013	0.879569	0.0126126
AAEL000138	NADH dehydrogenase, putative	H12	1.16077	0.599351	0.657945	0.255268	0.011561	-0.107351	-0.418999	-0.358548	-0.597908	1.75867	9.27e-18
AAEL000140	conserved hypothetical protein		-0.524038	-0.106228	-0.189087	0.0636724	0.0471916	0.103567	0.327526	-0.0116672	0.0895755	0.851564	0.329566
AAEL000142	hypothetical protein		0.173677	0.0743703	0.191894	-0.0289653	0.0212414	0.118474	-0.0806017	0.0460154	-0.129688	0.321583	0.996809
AAEL000143	conserved hypothetical protein		0.188304	-0.286165	-0.0138198	0.0252387	0.180575	-0.068044	0.0138198	0.148498	0.04519	0.474468	0.71334
AAEL000146	nitrilase, putative		0.26206	0.808397	0.09149	-0.160829	-0.697598	-0.445863	-0.397896	-0.25456	-0.464544	1.50599	0.0157142
AAEL000147	single-stranded DNA binding protein, putative	H6	-0.165458	0.0100381	0.636701	0.163874	-0.0100381	0.379383	0.659872	0.819112	1.1049	1.27036	5.18e-10
AAEL000148	conserved hypothetical protein		0.327347	-0.383886	-0.0664594	0.0690311	0.221406	0.121549	0.165573	-0.00168348	-0.010612	0.711233	0.934815
AAEL000149	Histone deacetylase complex subunit SAP30 homolog		-0.491624	0.199333	0.11069	0.101033	-0.100362	0.088293	0.225297	0.0638953	-0.363454	0.716921	0.207038
AAEL000153	conserved hypothetical protein		0.606094	-0.250356	-0.00915804	0.0824505	-0.0431118	0.00915804	-0.107184	-0.25711	-0.310106	0.9162	0.116255
AAEL000157	hypothetical protein		-0.152116	0.00239298	-0.287035	-0.156193	0.193431	0.0737552	0.0254264	-0.00239298	-0.10117	0.480465	0.990758
AAEL000159	nipsnap	H6	-0.364765	-0.0137995	1.08135	0.187695	-0.126763	-0.140882	-0.108643	0.00148259	-0.0323348	1.44611	2.76e-16
AAEL000161	conserved hypothetical protein		0.332646	-0.267459	-0.0393773	0.15001	0.0206207	0.179332	-0.137745	-0.115834	-0.111785	0.600106	0.79448
AAEL000163	mitochondrial inner membrane protein translocase, 22kD-subunit, putative		0.0330602	-0.116498	-0.228343	-0.219008	-0.0838207	0.149624	0.175557	0.174335	-0.166976	0.4039	0.41082
AAEL000164	d-amino acid oxidase		-0.0409226	0.135201	0.277569	-0.139724	-0.0625287	0.0611635	0.0448734	0.0512043	-0.017992	0.417293	0.767282
AAEL000165	conserved hypothetical protein	H6	-0.0360636	-0.375513	1.31088	0.658555	0.170705	0.269894	-0.0293626	0.38458	0.0293626	1.68639	1.45e-12
AAEL000166	conserved hypothetical protein		-0.123319	-0.195988	0.857756	0.0346592	0.320904	0.13576	0.621305	-0.0350249	0.0569492	1.05374	0.0949139
AAEL000168	conserved hypothetical protein		-0.144856	0.561624	0.0686441	-0.00933301	-0.297061	0.374748	-0.0291016	-0.124426	0.00933301	0.858685	0.546541
AAEL000170	hypothetical protein		-0.40024	0.180438	-0.00510594	0.0968538	0.278692	0.0459914	-0.143179	-0.0273131	-0.0909241	0.678931	0.720567
AAEL000171	hypothetical protein		-0.510727	-0.206887	-0.106859	0.132982	0.216099	-0.00369653	0.227337	0.148151	0.0926255	0.738064	0.25009
AAEL000172	hypothetical protein		-0.229058	-0.287984	-0.115741	0.0815326	-0.0146848	0.00465148	0.105526	0.0408066	0.0716649	0.39351	0.626411
AAEL000173	chromatin assembly factor-I p150 subunit, putative		0.265045	-0.696506	-0.380535	-0.000537281	-0.0790429	0.000537281	-0.0361271	-0.220325	0.0117086	0.96155	0.329867
AAEL000174	retinal protein		0	-1.09767	-0.1641	0.147912	-0.0891	-0.0107653	-0.100726	0.182215	-0.0088779	1.27988	0.257716
AAEL000175	Eukaryotic translation initiation factor 3 subunit C (eIF3c)(Eukaryotic translation initiation factor 3 subunit 8)		0.0362438	-0.677463	-0.385719	-0.0455048	0.0970926	0.0215963	-0.0777499	-0.0729347	-0.0689531	0.774555	0.0211214
AAEL000176	conserved hypothetical protein		0.0148378	-0.0992197	-0.130275	-0.0479862	0.253954	0.0285204	-0.084395	0.0688059	-0.244967	0.498921	0.882849
AAEL000177	conserved hypothetical protein		0.132858	-0.551194	-0.0517793	-0.0328247	0.00949102	-0.0304616	-0.00949102	0.124942	-0.121155	0.684051	0.0910107
AAEL000178	ubiquinone/menaquinone biosynthesis methyltransferase		-0.425412	0.298406	-0.092565	-0.173474	0.121014	0.197053	0.191419	0.175074	-0.0493385	0.723818	0.248596
AAEL000179	ubiquitin-conjugating enzyme E2 l		0.174927	0.752842	0.196588	0.125749	0.212588	0.138807	0.170966	0.0126976	-0.0439242	0.796766	0.0106098
AAEL000180	mitochondrial ribosomal protein, L17, putative		0.0384622	-0.210918	0.263176	0.114016	-0.139384	0.11982	-0.0282439	0.273139	-0.13264	0.484058	0.475123
AAEL000181	polybromo-1		-0.357432	-0.573124	-0.132141	0.143545	0.0244925	0.0724631	-0.0496552	-0.0242894	-0.0925746	0.716668	0.00961971
AAEL000182	conserved hypothetical protein	H12	1.07577	0.573381	0.673754	0.198304	-0.0121114	0.0121114	-0.875695	-0.61245	-0.915971	1.99174	6.88e-21
AAEL000184	conserved hypothetical protein	H9	-0.431022	0.601995	0.135674	-0.0833191	-0.560287	-0.0310913	0.0310913	0.116203	0.619996	1.18028	0.00249541
AAEL000185	eukaryotic translation initiation factor	H3	0.235756	0.920606	0.0340868	0.0871501	0.207097	0.00216386	-0.0102835	-0.170681	0.0665828	1.09129	6.24e-06
AAEL000186	conserved hypothetical protein		-0.428682	-0.312594	0.0559839	-0.241404	-0.00902009	-0.135069	-0.266447	0.091365	0.251113	0.679795	0.0607569
AAEL000187	lim-kinase1		0.293458	0.463579	-0.0489638	0.00688916	0.184967	-0.423354	-0.419619	-0.433367	-0.512527	0.976106	0.534585
AAEL000191	conserved hypothetical protein		-0.500244	-0.0650876	0.360611	-0.0455878	0.0885333	-0.057302	-0.0400448	0.211513	0.246585	0.860855	0.0189716
AAEL000192	hypothetical protein		0.0196783	-0.606983	0.0509097	-0.0196783	0.0440031	-0.208128	0.165845	-0.0906837	-0.224257	0.772827	0.940058
AAEL000193	histone-lysine n-methyltransferase		-0.232922	0.026928	0.0479796	0.173572	0.0581475	-0.0885782	-0.05612	-0.369511	-0.210501	0.543082	0.689689
AAEL000194	phosphatidylinositol 4-kinase		-0.27158	0.132985	0.118692	0.0907081	0.00105604	-0.0100108	0.00789339	0.05412	0.0674791	0.404565	0.924264
AAEL000195	conserved hypothetical protein		0.428655	0.0736336	-0.373547	-0.331631	-0.133648	-0.722952	0.0787504	-0.0945163	-0.0646635	1.15161	0.807916
AAEL000197	hypothetical protein		-0.650529	-0.362518	-0.0723709	0.130726	0.0828039	0.162046	0.282318	0.285008	0.0946421	0.935537	0.00337204
AAEL000198	conserved hypothetical protein		-0.0785706	-0.441626	-0.0766722	0.097197	-0.0852763	0.044784	0.0264427	-0.0601401	-0.0608979	0.538823	0.436842
AAEL000199	arginyl-tRNA synthetase		-0.368779	-0.195519	0.0210208	0.391272	0.325289	0.533529	0.436815	0.240158	0.364763	0.902308	0.000156011
AAEL000200	conserved hypothetical protein	H13	0.0773482	-1.1546	-0.166891	0.21413	0.0261449	0.306734	0.534044	0.480151	1.22645	2.38104	1.36e-13
AAEL000201	DNA replication helicase dna2		-0.50845	0.355458	-0.025286	0.521278	0.025286	-0.187656	0.112943	-0.0552887	0.128392	1.02973	0.815768
AAEL000202	T-box protein		-0.210766	-0.0233404	-0.728834	0.146963	-0.688864	0.32113	0.148986	-0.17065	0.101064	1.04996	0.473787
AAEL000204	conserved hypothetical protein		0.160019	-0.346769	-0.191738	-0.459281	-0.10606	-0.0979442	0.0120983	0.296872	0.15581	0.756153	0.196169
AAEL000205	conserved hypothetical protein		-0.256512	0.167696	-0.0845825	0.0288589	0.235956	-0.0288589	-0.164486	0.0962322	-0.446725	0.682681	0.990758
AAEL000206	ninjurin A, putative		0.287336	0.283526	0.0989535	-0.302954	0.00101282	-0.210602	-0.72768	-0.529251	-0.508789	1.01502	0.260572
AAEL000207	hypothetical protein		-0.40885	-0.0608842	-0.198247	0.214284	-0.00445668	0.00935561	0.105431	-0.266532	0.146701	0.623134	0.8942
AAEL000208	copii-coated vesicle membrane protein P24		-0.198094	0.639253	-0.10684	-0.0593907	0.0738114	0.111038	0.0696001	0.162286	0.165737	0.837347	0.00323833
AAEL000209	conserved hypothetical protein		0.309624	-0.0334887	0.198149	0.104914	-0.635162	-0.293171	-0.573853	-0.564451	0.309732	0.944894	0.368829
AAEL000210	mitochondrial ribosomal protein L2		-0.00054191	0.722274	0.0738822	-0.107734	-0.0756309	0.141175	0.0916052	-0.0882614	-0.165056	0.88733	0.000221939
AAEL000211	conserved hypothetical protein		0.382829	-0.260366	0.0389403	0.202852	-0.101095	0.107884	-0.059527	-0.0237917	-0.0769503	0.643195	0.361065
AAEL000212	conserved hypothetical protein		0	-0.105964	-0.22865	0.0838961	-0.0243408	0.012119	0.0881344	-0.0549096	-0.057995	0.316785	0.924086
AAEL000213	d-amino acid oxidase	H4	0	2.83783	1.8591	0.423314	-0.0208948	-0.148173	-0.22493	-0.185206	0.160378	3.06276	2.29e-132
AAEL000214	vacuolar protein sorting (vps33)		0	0.183848	0.129374	-0.294076	0.200583	0.000760007	0.234951	0.356384	0.562448	0.856524	0.0596196
AAEL000215	ribonuclease P, 29kD-subunit, putative	H7	-0.0472116	-1.15516	0.18256	-0.12716	0.0817664	-0.0226205	0.0226205	0.276794	-0.140138	1.43196	0.000347815
AAEL000217	serine/threonine protein kinase	H9	-0.545707	0.0432133	-0.0427967	0.168825	-0.0889816	0.0427967	0.278406	-0.0524611	0.747204	1.29291	0.00584691
AAEL000218	hypothetical protein	H12	1.00992	0.312547	0.433349	-0.0829382	-0.430953	0.03887	-0.106609	0.0702703	-0.424815	1.44087	0.00724809
AAEL000219	lactoylglutathione lyase		-0.339353	-0.123718	0.0203127	0.466432	0.374697	0.260318	-0.0203127	0.0489875	0.206341	0.805784	0.218564
AAEL000220	conserved hypothetical protein		-0.470009	0.23301	-0.0733701	-0.269516	0.0668652	0.0906796	-0.179226	0.0192396	0.257153	0.727163	0.217185
AAEL000221	mediator complex, subunit, putative		-0.0906361	0.333209	0.232782	-0.0201716	0.161008	-0.0967146	-0.298256	-0.155359	-0.271427	0.631465	0.0957268
AAEL000222	conserved hypothetical protein		0.240765	0.0232562	-0.110511	-0.0232562	0.161704	-0.206292	-0.364404	0.148055	-0.471692	0.712457	0.303193
AAEL000223	alpha-glucosidase	H4	0.393073	1.83975	0.411558	-0.250191	-0.744807	-0.0207011	-0.432076	0.208077	-0.209733	2.58456	8.02e-13
AAEL000226	conserved hypothetical protein		-0.486617	0.23508	-0.0218188	0.0642508	-0.252847	0.0562811	-0.050074	-0.121165	0.0360663	0.721697	0.864207
AAEL000227	ClassB Scavenger Receptor (CD36 domain).	H5	0.0577184	0.915202	0.692151	-0.0699532	0.00225061	-0.383747	-0.292033	-0.0907149	-0.100256	1.29895	2.42e-15
AAEL000228	leucine rich repeat containing 16, putative		-0.509917	0.161757	-0.0757449	-0.152804	0.223496	-0.124336	-0.0472571	0.0472571	0.057857	0.733412	0.387633
AAEL000229	Prosialokinin Precursor [Contains Sialokinin(Sialokinin-1)(Sialokinin I)(Sia I)(Sialokinin-2)(Sialokinin II)(Sia II)]	H13	0.487704	-0.036171	0.397972	0.543435	0.00378326	-0.142856	-0.620609	-0.581686	-0.817441	1.36088	1e-10
AAEL000230	conserved hypothetical protein		0.124799	0.309864	0.129451	-0.0748433	0.015903	-0.0283689	0.0187378	0.10046	-0.232263	0.542128	0.673836
AAEL000231	oligopeptidase		-0.491064	-0.725624	-0.598757	-0.301735	-0.0420321	0.0957178	0.044992	0.115228	0.0420321	0.840852	3.42e-06
AAEL000233	membrane-associated guanylate kinase, putative	H14	0.576091	0.254825	0.0949011	0.0165171	-0.0104906	-0.249495	-0.376833	-0.558597	-0.590764	1.16685	0.000127169
AAEL000234	ClassB Scavenger Receptor (CD36 domain).	H5	-0.863835	0.3237	0.751707	0.0481666	0.00605496	-0.358651	-0.164762	-0.0616477	0.0248796	1.61554	4.6e-11
AAEL000235	hypothetical protein		-0.380444	0.0869681	0.404431	0.215739	0.275871	0.0572074	-0.0945919	-0.0948098	-0.166379	0.784875	0.0101633
AAEL000237	hypothetical protein		-0.47469	-0.140414	0.0173968	-0.0173968	0.301719	0.0619877	0.419498	0.467302	0.435266	0.941992	0.916815
AAEL000239	clathrin coat assembly protein		-0.0443569	-0.131535	-0.0870418	0.0543296	-0.0458008	0.0290899	-0.0101845	0.022319	-0.0751817	0.185865	0.999122
AAEL000240	conserved hypothetical protein		-0.137723	0.00283736	-0.00283736	-0.135002	0.0633172	0.116147	-0.14797	0.0568982	-0.224409	0.340557	0.833048
AAEL000241	conserved hypothetical protein		0.0335657	-0.531969	-0.102852	-0.00796162	0.211433	0.00796162	0.142278	0.116239	0.114121	0.743402	0.0928487
AAEL000242	voltage-gated potassium channel		-0.398593	-0.244439	-0.126319	0.237519	0.317603	0.0559528	0.357777	-0.0559528	-0.313832	0.75637	0.642714
AAEL000243	leucine-rich transmembrane protein		0.824126	0.166632	-0.265832	0.196542	-0.301737	-0.021871	-0.0614538	0.021871	-0.0506533	1.12586	0.948015
AAEL000244	alpha(1,3)fucosyltransferase	H8	0.0460174	-0.169664	-0.342041	-0.625611	-0.301205	0.110581	0.377761	0.828997	0.991622	1.61723	4.82e-08
AAEL000245	conserved hypothetical protein		0.0318228	0.0977288	0.00983427	-0.00983427	0.0565122	-0.0372544	-0.135989	-0.0357154	-0.0920451	0.233717	0.997387
AAEL000246	GPCR Frizzled/Smoothened Family		-0.0634592	-0.439	0.0189807	0.117035	0.207105	0.0950324	-0.107255	-0.496115	0.381589	0.877704	0.449066
AAEL000248	GTP binding protein	H1	-0.324647	0.393705	1.18444	1.12847	0.62092	0.520307	0.475039	0.0540368	-0.270992	1.50909	5.99e-17
AAEL000249	mitochondrial carrier protein	H4	-0.074499	1.15582	0.796899	0.15129	0.0376407	-0.0317016	0.000213036	-0.267184	-0.213488	1.42301	4.21e-18
AAEL000250	forkhead box protein (AaegFOXP)		-0.205308	0.0810026	0.026188	-0.098338	0.177356	-0.227225	-0.042972	-0.425889	-0.0406536	0.603245	0.894789
AAEL000251	conserved hypothetical protein		0.051196	-0.231208	0.101529	0.153572	0.0525143	-0.175502	-0.150793	-0.0857059	-0.362932	0.516504	0.447381
AAEL000252	hypothetical protein		-0.414887	-0.662862	-0.340295	0.290117	-0.222854	0.110787	0.254019	-0.0523758	-0.0847929	0.952979	5.59e-06
AAEL000254	nuclear factor i	H13	-0.579004	-0.862682	-0.416663	-0.0230763	0.077531	0.0230763	0.454923	0.325126	0.141944	1.3176	0.00674996
AAEL000255	conserved hypothetical protein		-0.218968	0.621013	0.275972	0.33501	0.144704	-0.165019	-0.181731	-0.0750709	-0.0161541	0.839981	0.662758
AAEL000256	ClassB Scavenger Receptor (CD36 domain).		-0.185658	-0.125931	-0.0275354	0.118217	0.0635124	-0.188373	-0.169679	0.0275354	0.136322	0.324696	0.785076
AAEL000257	hypothetical protein		-0.0174167	0.000110331	0.0252223	0.147962	-0.0532188	0.143386	-0.113529	0.0243282	-0.0725885	0.261491	0.968453
AAEL000258	conserved hypothetical protein	H3	0.830452	1.91062	0.261131	0.171058	-0.070595	-0.143079	-0.211565	-0.31476	-0.328324	2.23895	2.46e-54
AAEL000259	Copper-Zinc(Cu-Zn) Superoxide Dismutase.	H2	1.07979	1.31361	0.696208	0.195611	-0.637883	-0.128783	-1.04822	-0.0356119	-0.900465	2.36183	2.48e-14
AAEL000260	conserved hypothetical protein		-0.113932	-0.480041	-0.116494	0.0495764	-0.110421	-0.00380989	0.0382922	0.137499	0.055424	0.617541	0.937232
AAEL000261	hypothetical protein		-0.00126179	0.176385	-0.0408628	0.421025	-0.0537788	0.184708	0.14193	0.00126179	0.167018	0.474804	0.912776
AAEL000262	conserved hypothetical protein		-0.321303	0.0110877	-0.181654	-0.159061	0.0498395	-0.050907	0.0735138	-0.0110877	-0.0309286	0.394817	0.909908
AAEL000263	Zinc finger protein jing homolog		-0.105637	0.592004	-0.167868	-0.061124	-0.0663891	-0.0985223	-0.0304625	0.177619	0.0628179	0.759871	0.591859
AAEL000264	phopholipase d	H9	0	0.210129	-0.377051	-0.382095	-0.115666	-0.020238	0.230378	0.213759	0.619838	1.00193	0.000197633
AAEL000265	Protein crossbronx homolog		0.392894	0.0701367	0.205379	-0.284128	0.0221696	-0.00964714	-0.279398	0.158619	-0.325944	0.718838	0.157846
AAEL000266	GPCR Orphan/Putative Class A Family		0.676533	-0.679318	-0.106974	-0.026731	0.132005	-0.00397306	0.446179	-0.26706	-0.353774	1.35585	0.50945
AAEL000267	conserved hypothetical protein		-0.650033	-0.381416	-0.698428	0.0389774	0.131006	0.276433	-0.352535	-0.0389774	-0.476252	0.974861	0.66563
AAEL000268	lipase		-0.0455755	0.206841	0.447718	0.196625	-0.320137	0.207637	-0.145305	-0.0610177	-0.614791	1.06251	0.899413
AAEL000269	conserved hypothetical protein	H14	0.288007	-0.565399	-0.756355	-0.0609201	0.12461	0.0609201	-0.0928379	-0.379629	-0.430621	1.04436	0.000211175
AAEL000270	26S proteasome regulatory subunit 7, psd7		-0.0523863	-0.0815943	0.087928	0.0441975	0.0692269	0.333044	0.382357	0.628989	0.394173	0.710583	0.0205801
AAEL000271	gamma-glutamyl hydrolase, putative	H9	0.174657	0.947003	0.184619	-0.323562	-0.473873	-0.339098	0.209044	0.15003	1.04495	1.51882	6.43e-20
AAEL000272	conserved hypothetical protein		-0.528652	0.213622	0.581292	-0.272505	0.791554	0.0130156	0.259225	0.116936	-0.0341965	1.32021	0.425736
AAEL000273	inositol triphosphate 3-kinase c		-0.0350485	-0.419245	-0.12786	0.0241863	-0.0570909	0.0941001	0.18948	0.0949303	0.162219	0.608725	0.11823
AAEL000274	Copper-Zinc(Cu-Zn) Superoxide Dismutase.		-0.0287496	0.0200253	0.746121	0.165937	-0.110657	-0.108596	-0.0571912	0.151464	-0.0946149	0.856778	0.000742098
AAEL000276	conserved hypothetical protein		0.0768273	-0.719201	-0.253642	0.115405	-0.0184995	0.13205	0.187533	0.0871397	0.244074	0.963275	1.54e-05
AAEL000277	conserved hypothetical protein		0.127341	-0.242858	-0.180723	-0.430594	-0.467645	0.0840028	0.367639	0.263861	0.488942	0.956587	4.93e-09
AAEL000278	poly(p)/ATP NAD kinase	H1	-0.556461	-0.0368251	0.147761	0.492667	0.202052	-0.00832964	-0.00102153	-0.310735	-0.471756	1.04913	4.49e-06
AAEL000279	N-formylmethionylaminoacyl-tRNA deformylase, putative		0.175781	0.403028	0.0171925	-0.182065	-0.0930693	0.233345	0.116482	0.161023	-0.115566	0.585094	0.417013
AAEL000281	conserved hypothetical protein		0.153267	-0.0127748	-0.131609	0.0395843	-0.112507	-0.106527	0.252551	-0.0813547	0.275685	0.407294	0.74476
AAEL000282	syntaxin, putative		-0.182502	0.35113	-0.277302	0.590203	-0.207148	-0.00358651	0.00358651	-0.402024	-0.193094	0.992227	0.271193
AAEL000283	C-Type lectin (CTL) - mannose binding.	H10	1.03768	0.477302	-1.71663	-0.285786	-0.385975	0.0070952	0.673654	-0.0070952	0.392042	2.75431	0.000276868
AAEL000284	conserved hypothetical protein		-0.204173	0.127367	-0.0923133	0.165474	0.150783	0.240833	0.0668291	-0.00344524	-0.00169031	0.445006	0.973319
AAEL000287	hypothetical protein	H9	0.0418278	0.755426	-0.0661488	-0.155809	0.267366	-0.491563	0.140603	-0.26328	0.144066	1.24699	0.00661229
AAEL000288	conserved hypothetical protein		0.187119	-0.125233	0.012068	0.0204932	-0.0562471	-0.190304	-0.179096	-0.174422	-0.177967	0.377423	0.831831
AAEL000289	conserved hypothetical protein		0.0403943	-0.137815	-0.00228516	0.0944766	0.00228516	0.0811861	0.228109	-0.186462	-0.0305373	0.414571	0.897516
AAEL000290	conserved hypothetical protein		-0.163639	0.178878	0.0961891	-0.22814	0.134686	0.0245453	-0.0344449	-0.0735339	0.0363342	0.407018	0.949713
AAEL000291	V-type proton ATPase 16 kDa proteolipid subunit (V-ATPase 16 kDa proteolipid subunit)(Vacuolar proton pump 16 kDa proteolipid subunit)(V-ATPase subunit C)	H7	0.00183037	-0.64019	0.0366121	0.107173	-0.0267381	0.215079	0.259927	0.49096	0.417741	1.13115	0.000117237
AAEL000292	conserved hypothetical protein		-0.330988	-0.052484	-0.029242	0.0681946	0.260397	0.216328	0.00832009	-0.0258153	0.0315917	0.591385	0.891852
AAEL000293	ebna2 binding protein P100	H10	0.709098	0.945236	-0.352261	-0.196033	-0.219686	0.0540738	0.0976072	0.131131	0.341759	1.2975	7.58e-11
AAEL000294	conserved hypothetical protein	H10	0.0224632	0.0154911	-0.825482	-0.766665	-0.562984	-0.225624	0.109647	0.198163	1.00316	1.82864	6.45e-08
AAEL000295	hypothetical protein		0.0624273	-0.223525	-0.00692934	0.0407556	0.00692934	0.0205383	0.103445	0.100217	-0.156947	0.326969	0.820589
AAEL000296	conserved hypothetical protein		-0.252013	0.0597342	-0.253427	-0.00234692	0.00234692	-0.178675	0.0530164	-0.0143315	-0.0222131	0.313161	0.97243
AAEL000297	mitochondrial ribosomal protein S25		0.0504329	0.470402	0.0746337	-0.198597	0.0703677	0.0716849	-0.1046	-0.0556359	-0.410556	0.880958	0.003121
AAEL000299	hypothetical protein		-0.0442154	0.698118	0.0413689	0.0536676	0.46817	-0.0744547	-0.0485736	-0.106911	-0.154089	0.852207	0.24746
AAEL000300	WD-repeat protein	H13	0.214941	-1.60473	-0.549622	-0.0605304	-0.0604561	0.0604561	-0.0840263	-0.17556	0.176952	1.81968	7.32e-10
AAEL000301	heat shock protein		0.14573	-0.27993	0.061584	-0.120828	0.00870825	-0.00870825	-0.126278	0.0342349	-0.132334	0.42566	0.747838
AAEL000304	conserved hypothetical protein		-0.0201609	-0.0353846	-0.0292923	-0.0228539	-0.0602774	0.123628	0.352357	0.296264	0.774934	0.835211	3.17e-05
AAEL000305	conserved hypothetical protein		-0.174687	-0.0592981	0.064817	0.0904641	0.0934043	0.0423088	-0.0297177	-0.260648	0.0302254	0.354052	0.995629
AAEL000306	conserved hypothetical protein		-0.34642	0.581326	0.238969	-0.131449	0.402158	-0.254285	0.47459	0.854468	0.816797	1.20089	0.0593631
AAEL000308	conserved hypothetical protein		0.132702	0.532059	0.102616	-0.612818	-0.160265	-0.0526762	0.494168	0.223986	0.392162	1.14488	0.0191224
AAEL000309	hypothetical protein	H6	-0.328876	0.305881	1.19061	1.11733	0.794573	0.223751	0.10765	0.123538	0.619156	1.51949	6.03e-15
AAEL000310	hypothetical protein		0.32788	-0.487925	-0.27885	-0.0801419	-0.286585	0.205811	0.0587865	0.255007	0.0739425	0.815805	0.358276
AAEL000311	conserved hypothetical protein	H7	0.37426	-4.11682	0.369192	0.0180367	-0.321852	-0.131539	-0.217046	-0.0880636	0.200755	4.49108	2.15e-77
AAEL000312	hypothetical protein		0.0591582	-0.437349	-0.0921405	0.459857	0.10407	-0.42641	0.0666757	-0.341796	0.332568	0.897206	0.422286
AAEL000313	conserved hypothetical protein	H8	-0.597536	-0.467678	-0.0166802	-0.499244	-0.448801	0.220946	0.469759	0.516003	0.839847	1.43738	0.000571042
AAEL000314	malate dehydrogenase	H5	-0.521763	0.560823	0.800842	-0.00538927	-0.170811	0.00538927	0.129676	0.080103	0.053872	1.3226	0.0026415
AAEL000315	pigeon protein (linotte protein)		0	-0.562897	-0.237717	-0.180485	0.164967	0.126899	0.283875	0.310746	0.338366	0.901263	5.27e-05
AAEL000316	hypothetical protein		-0.221828	0.34067	0.448802	-0.0539898	-0.0994026	-0.157616	-0.0637946	-0.193879	0.195199	0.67063	0.0215396
AAEL000319	hypothetical protein	H3	0.806047	1.69699	0.252371	-0.146931	0.055234	-0.380268	0.107513	-0.272763	-0.126733	2.07726	0.000191808
AAEL000320	cytochrome P450		0	-0.545852	0.648933	0.183397	-0.0461171	-0.282865	-0.683504	0.159159	0.40951	1.33244	0.433342
AAEL000321	acetyl-coa synthetase	H7	-0.17172	-0.914653	0.606854	1.07033	0.350225	0.0844955	-0.0105759	-0.039716	-0.478404	1.98499	1.23e-16
AAEL000322	hypothetical protein		-0.337581	-0.134718	0.398205	0.223172	-0.0459392	0.183755	0.027103	-0.0221483	-0.038187	0.735785	0.493309
AAEL000324	tyrosine-protein kinase drl		0.259549	-0.107441	-0.0243335	0.0243335	0.145109	-0.109545	0.353996	0.182499	-0.208846	0.562841	0.912968
AAEL000327	Ecdysone-inducedprotein 78C, Nuclear receptor		-0.0881416	-0.289161	0.0881416	0.269917	0.155268	-0.300843	-0.246607	-0.287298	-0.311327	0.581244	0.566884
AAEL000328	conserved hypothetical protein		0.632165	0.34826	0.408044	0.0856101	-0.0330805	0.0122415	-0.0122415	-0.149929	-0.329032	0.961198	0.00218172
AAEL000330	conserved hypothetical protein		-0.0615487	-0.455394	0.0632029	0.0967165	0.325742	0.0913682	-0.101913	0.274159	0.144526	0.781137	0.174899
AAEL000331	elongation factor ts		-0.00887845	-0.230915	-0.228603	0.00131731	0.0113651	0.0841777	-0.123324	0.000191374	-0.0919776	0.315092	0.836546
AAEL000332	conserved hypothetical protein		-0.0061977	0.392557	0.161081	-0.137451	-0.00916572	0.298602	0.147865	-0.0256221	-0.182159	0.574716	0.173514
AAEL000334	villin		-1.18451	0.738086	0.131538	-0.10193	0.483552	-0.119899	0.108236	0.0452457	-0.293379	1.9226	0.519723
AAEL000336	conserved hypothetical protein		0.0926919	-0.807771	-0.227782	-0.122919	-0.163012	0.0168268	0.0982354	-0.00370141	-0.225422	0.906006	0.100481
AAEL000337	hypothetical protein		-0.265767	-0.437327	-0.0878171	0.0589185	0.376133	-0.044463	0.000222329	0.216959	-0.000222329	0.81346	0.343088
AAEL000339	lim domain		0.701824	-0.00106651	0.167072	-0.0568851	0.00106651	-0.0404259	-0.0385928	-0.0417814	-0.116831	0.818655	0.0903953
AAEL000340	cytochrome P450	H12	1.31276	0.957816	1.41176	0.369236	-0.0379557	-0.211514	-0.162828	-0.426185	-0.819139	2.2309	2.81e-18
AAEL000341	basic helix-loop-helix protein		0.462949	0.125596	0.0839503	-0.283347	-0.110521	0.0450666	-0.0717614	0.26065	-0.0538683	0.746296	0.860623
AAEL000342	peroxidasin		-0.282362	0.471832	0.0113097	0.41541	-0.155844	-0.0701705	0.193844	0.00978313	0.442891	0.754193	0.101632
AAEL000343	serine/threonine-protein kinase vrk		-0.236245	0.247139	0.0768187	-0.0406328	0.011091	-0.0690986	0.0174362	-0.011091	-0.0911833	0.483383	0.754719
AAEL000345	membrane associated guanylate kinase inverted 1, magi1		0.0871164	0.0302727	-0.226001	0.0879162	0.0335573	-0.0654281	-0.0302727	-0.337798	-0.077154	0.425714	0.963727
AAEL000346	spastin		0.00935022	0.652411	-0.0712249	0.0998454	-0.00935022	-0.0465399	-0.107112	-0.263719	-0.0915277	0.91613	0.143304
AAEL000348	conserved hypothetical protein		0	0.13322	-0.214728	0.438755	-1.22056	-0.859455	0.786844	-0.121602	0.011828	2.00741	0.0152361
AAEL000349	conserved hypothetical protein		-0.0757704	0.282895	-0.372974	-0.49376	-0.0350011	-0.105296	0.237394	0.315791	0.488721	0.982482	0.597236
AAEL000351	conserved hypothetical protein		-0.920163	-0.386916	-0.0252349	-0.200132	-0.966287	0.0252349	0.152148	0.477273	0.868009	1.8343	0.0439354
AAEL000354	dimeric dihydrodiol dehydrogenase	H1	0.416217	0.991109	1.31747	1.40156	1.08511	0.443938	-0.0526488	-0.318004	-0.399552	1.80111	7.45e-35
AAEL000362	conserved hypothetical protein		-0.244333	-0.160818	-0.0358512	0.265967	0.31563	0.386222	0.461552	0.26421	0.316794	0.705885	0.258218
AAEL000365	hypothetical protein		-0.0726016	0.127509	0.269793	0.112282	0.103786	-0.0781085	-0.00539226	0.0498072	-0.00289873	0.347901	0.834663
AAEL000368	conserved hypothetical protein		-0.185837	0.0502512	0.104874	0.203523	-0.260004	-0.0278149	-0.00152069	-0.221909	-0.0431729	0.463527	0.641904
AAEL000370	acyl-CoA oxidase	H7	-0.239499	-0.697593	0.00663581	0.0980701	0.095765	0.0637188	0.350098	0.353659	0.583098	1.28069	3.87e-07
AAEL000371	hypothetical protein		0.0209685	-0.763422	-0.685899	0.345192	-0.264225	-0.0627555	-0.243349	0.0849174	-0.442199	1.10861	0.278922
AAEL000372	myo inositol monophosphatase		-0.23	0.251625	-0.49595	0.338207	-0.0157906	0.12323	-0.156019	-0.143837	-0.288692	0.834158	0.000282656
AAEL000374	cysteine-rich venom protein, putative	H11	0	-0.301087	-0.0932579	-0.224633	-0.218604	0.265344	2.258	2.10056	2.01336	2.55909	4.37e-25
AAEL000376	heme peroxidase		0.0138651	0.0598771	-0.161641	-0.0138651	-0.0600308	-0.185662	0.345782	-0.232019	0.569284	0.801303	0.327093
AAEL000378	integrin-linked protein kinase 2 (ilk-2)	H2	0.518443	0.61429	0.420596	0.153722	0.0303757	-0.0798844	-0.162743	-0.243154	-0.419394	1.03368	2.21e-08
AAEL000380	conserved hypothetical protein		-0.152613	-0.064074	-0.0963639	0.0607783	0.158016	-0.0508509	0.014298	-0.327208	0.00102117	0.485224	0.919286
AAEL000381	syntrophin		0.13201	0.0227689	-0.015548	-0.196865	-0.206089	0.191837	-0.258068	-0.249583	0.0488863	0.449905	0.985451
AAEL000383	beta-1,3-galactosyltransferase brn		-0.0333085	-0.0217065	0.140871	0.150998	0.127406	-0.167233	0.0217065	0.176502	0.213091	0.380324	0.942363
AAEL000385	developmentally regulated RNA-binding protein		-0.177799	-0.0450932	0.00594401	0.139521	0.398432	0.180407	0.0306944	0.208127	0.110436	0.57623	0.463924
AAEL000386	phopsphatidylinositol 3-kinase, drosophila		-0.142623	-0.21413	0.249721	0.0322202	0.00235948	-0.0814919	0.0360274	0.195756	0.30743	0.521559	0.161122
AAEL000387	hypothetical protein	H5	0.595552	0.68331	0.822701	0.0947367	-0.0947367	-0.230235	-0.242928	0.131185	0.527348	1.06563	0.0019587
AAEL000388	isoleucyl tRNA synthetase		-0.266885	-0.231079	-0.042949	0.466244	0.439604	0.565975	0.430791	0.290681	0.392068	0.83286	9.62e-05
AAEL000390	hypothetical protein		-0.627411	0.132286	-0.0219583	0.232062	0.342063	-0.188728	0.00554782	-0.208864	0.130416	0.969474	0.509962
AAEL000392	Probable maltase Precursor (EC 3.2.1.20)		-0.454916	-0.493039	0.021337	-0.0812864	-0.0646207	0.126271	0.00579781	-0.074528	-0.00579781	0.619309	0.585827
AAEL000393	suppressors of cytokine signalling	H11	0.0503298	-0.0329754	-0.416325	0.0329754	-0.0792464	0.176776	0.576273	0.754644	1.51479	1.93112	1.7e-12
AAEL000394	U2 small nuclear ribonucleoprotein, putative		-0.0677429	0.0431028	-0.0231803	-0.0871156	0.170675	0.0939762	0.231862	0.248787	0.0231803	0.335903	0.81402
AAEL000395	Ultraspiracleisoform A, nuclear receptor		-0.0121493	0.281718	-0.0458527	-0.206018	-0.0800717	-0.0239973	0.0278348	-0.0111506	0.000413039	0.487736	0.700313
AAEL000396	hypothetical protein		0.0249944	-0.133415	0.154643	0.158678	0.349526	0.00696067	-0.0262076	0.170392	-0.217261	0.566787	0.827969
AAEL000397	conserved hypothetical protein		-1.2641	-0.218035	0.367378	0.173976	-0.0107818	0.0133613	0.211836	0.0107818	-0.0741046	1.63148	0.74104
AAEL000398	sidestep protein		0.125847	-0.147198	0.0718565	-0.130999	-0.237547	-0.0718565	-0.0868567	0.0757033	-0.261358	0.387204	0.962249
AAEL000399	conserved hypothetical protein		-0.0978478	0.773142	0.0667218	-0.167436	0.0196389	-0.112857	0.0347768	0.219294	0.162357	0.940578	0.00888178
AAEL000400	hypothetical protein	H9	-0.183618	0.286551	-0.380183	-0.105193	0.100175	0.109557	0.376236	0.596426	1.22204	1.60222	2.33e-11
AAEL000401	conserved hypothetical protein		-0.0202891	-0.0942889	0.112807	0.117769	0.218301	0.108856	0.0202891	0.160434	0.0356652	0.31259	0.999649
AAEL000402	conserved hypothetical protein		0.596941	0.380437	-0.551635	-0.248085	-0.352465	-0.385379	0.344572	-0.048347	0.665071	1.21671	0.0101161
AAEL000403	conserved hypothetical protein		0.0827446	-0.739684	-0.107703	0.0632083	0.212559	0.147503	-0.0139582	0.000910979	0.101377	0.952243	0.469503
AAEL000404	DNA repair helicase rad3/xp-d		-0.346773	-0.695178	-0.278495	0.108256	0.0664243	0.102903	0.136323	0.0283504	0.136284	0.831501	0.00194045
AAEL000405	odd Oz protein		-0.137375	0.146816	-0.188908	0.269944	-0.0778605	0.0565012	0.465363	0.333322	0.655573	0.84448	0.00309485
AAEL000406	conserved hypothetical protein	H8	-0.118235	-0.357359	-0.316361	-0.318725	0.110692	0.263026	0.237281	0.619433	0.778261	1.13562	0.00322133
AAEL000407	conserved hypothetical protein		0.0409322	0.516596	0.162393	-0.0990461	-0.00717438	0.225003	-0.310447	0.481382	0.178886	0.827042	0.365027
AAEL000408	conserved hypothetical protein		0.064192	-1.1754	-0.064192	0.133964	-0.183238	-0.113853	-0.274812	0.139325	0.113629	1.31472	0.237947
AAEL000409	conserved hypothetical protein		0.693443	-0.458216	-0.3737	0.252292	-0.0509481	0.312921	-0.0555429	0.0509481	0.0809032	1.15166	0.734811
AAEL000410	glycoprotein 25l		-0.10727	0.3601	0.00683246	-0.100324	-0.0193122	0.128305	0.142934	0.126397	0.167934	0.46737	0.448585
AAEL000412	conserved hypothetical protein		-0.000841665	0.0411783	0.531473	-0.0920864	-0.175182	-0.0312039	0.000841665	0.199231	0.472254	0.706655	0.0115079
AAEL000415	AMP dependent coa ligase	H8	-0.342639	-0.124517	0.405442	-0.322284	-0.206976	0.0690513	-0.0360138	0.5588	0.806516	1.14916	5.49e-09
AAEL000416	hypothetical protein		-0.748934	0.306053	-0.458569	0.226523	-0.0186182	0.0186182	0.231047	0.146111	0.763078	1.51201	0.0116696
AAEL000417	monocarboxylate transporter		0.454847	0.150118	0.252003	0.0863478	-0.167885	-0.0369833	-0.144605	-0.131402	-0.134937	0.622732	0.0832809
AAEL000418	conserved hypothetical protein	H2	0.0218058	0.274752	0.329609	-0.00117483	-0.157992	-0.298818	-0.702512	-0.548879	-0.840866	1.17047	1.13e-10
AAEL000419	conserved hypothetical protein		0.106135	-0.684672	0.156291	0.155146	-0.00268055	-0.0837541	-0.0273991	7.03086e-05	0.106643	0.840963	0.294242
AAEL000420	cathepsin o		-0.421489	0.241843	0.107266	-0.214819	0.0845007	-0.0213332	-0.1594	0.0213332	-0.16237	0.663332	0.44192
AAEL000421	protein farnesyltransferase alpha subunit/rab geranylgeranyl transferase alpha subunit		0.0495331	-0.098892	-0.140408	0.0800422	-0.11198	-0.186678	-0.274078	-0.498853	-0.294821	0.578895	0.408291
AAEL000422	U3 small nucleolar RNA-associated protein homolog, putative	H13	0.353773	-1.23864	-0.399457	-0.0750129	0.0682714	0.00557226	-0.200921	-0.180719	-0.0919277	1.59241	9.36e-08
AAEL000423	conserved hypothetical protein		-0.241622	-0.0259777	-0.0272419	0.197348	0.234023	-0.0748214	0.104944	0.0916904	-0.210792	0.475645	0.805053
AAEL000424	leucine aminopeptidase		0.486185	0.552965	0.0865599	0.0499935	-0.0442483	-0.074662	-0.176144	-0.151834	-0.233837	0.786802	2.81e-05
AAEL000425	conserved hypothetical protein		-0.486624	-0.257992	-0.0320137	0.0424546	0.260776	0.151043	0.26475	0.0326383	0.041507	0.751374	0.633318
AAEL000427	conserved hypothetical protein	H10	0.188017	0.287583	-0.266074	0.486704	0.312363	0.0752272	-0.204194	-0.470155	-0.580039	1.06674	4.12e-09
AAEL000428	Tryptophan 2,3-dioxygenase (TDO)(EC 1.13.11.11)(Tryptophan pyrrolase)(Tryptophanase)(Tryptophan oxygenase)(TRPO)(TO)(Tryptamin 2,3-dioxygenase)	H11	0.198903	0.115092	0.534055	0.0801	-0.0381797	-0.238536	0.253091	-0.0371805	1.06154	1.30007	8.28e-07
AAEL000429	hypothetical protein		-0.537079	0.290667	0.260438	0.379066	0.197725	0.168126	0.225468	-0.288628	-0.178358	0.916145	0.157307
AAEL000430	hypothetical protein		-0.241803	0.0305924	0.10985	-0.071163	0.169223	-0.108369	-0.100163	-0.00730034	-0.104695	0.411025	0.831017
AAEL000431	conserved hypothetical protein		-0.230242	-0.190914	-0.000177706	-0.166801	0.000177706	-0.131362	-0.527326	-0.522793	-0.669943	0.670121	0.0161528
AAEL000433	glypican		-0.487618	-0.417767	-0.00667575	0.0595255	0.00667575	-0.216354	-0.123604	0.138397	0.148971	0.636589	0.571527
AAEL000434	lipid a export ATP-binding/permease protein msba		0.139758	0.239899	0.217363	0.11392	0.0492137	0.243003	0.0191416	-0.297646	-0.349311	0.592314	0.0260119
AAEL000435	THO complex, putative		-0.203758	-0.124276	0.0127636	0.497343	0.552809	0.576699	0.362869	0.237779	-0.0446295	0.780458	0.00491654
AAEL000436	conserved hypothetical protein	H13	1.1706	-1.61469	-0.606287	-0.0521667	0.100005	0.150638	0.0433132	0.0887774	-0.0404283	2.78529	2.87e-21
AAEL000438	epoxide hydrolase	H7	0.0347537	-0.705832	0.458112	0.879295	0.17562	-0.38776	-0.490545	-0.517007	-0.638012	1.58513	3.86e-30
AAEL000439	hypothetical protein		0.385608	0.300775	-0.0681144	0.319736	0.234685	0.131921	0.0485678	-0.108851	-0.0665035	0.494459	0.849758
AAEL000440	DNA repair/transcription protein met18/mms19		-0.00211999	0.756636	-0.143743	-0.211666	-0.0151555	0.0577136	-0.0568868	0.0675413	0.0391144	0.968303	7.71e-06
AAEL000444	udp-glucose glycoprotein:glucosyltransferase		0.056032	0.189045	-0.270191	-0.147819	-0.0213905	0.0110231	0.00730245	0.128216	0.272799	0.54299	0.238361
AAEL000445	conserved hypothetical protein	H14	1.26369	0.541532	0.141867	-0.0953711	-0.0206503	0.0206503	0.174425	-0.0798978	-0.377798	1.64148	1.09e-11
AAEL000446	tight junction protein		0.00332283	0.00513161	0.006165	-0.0229554	-0.0107442	0.0670827	-0.0188734	0.0261323	-0.00332283	0.0900382	0.99998
AAEL000447	V-1 protein, putative		-0.116361	0.798405	0.244091	-0.00775948	0.350358	0.00775948	-0.293609	0.634958	0.775989	1.09201	0.612188
AAEL000448	conserved hypothetical protein	H4	0.0216158	0.693358	0.214506	0.0982828	-0.0196599	-0.211582	-0.172135	-0.309306	0.0196599	1.00266	3.16e-05
AAEL000449	acidic ribosomal protein P1, putative	H14	1.8331	-0.319263	-0.418854	-0.3558	0.0877219	0.959234	0.0984602	0.891801	0.376461	2.25195	1.12e-05
AAEL000450	ras GTPase activating protein	H9	-0.591234	0.413198	-0.130965	0.0713548	-0.123181	0.0742589	0.297629	0.125892	0.63997	1.2312	6.33e-06
AAEL000451	beta1,4 mannosyltransferase		0.386611	-0.0330774	0.0183417	0.11086	-0.0452149	0.229979	0.0530318	0.129907	-0.0183417	0.431826	0.788462
AAEL000452	histone acetyltransferase gcn5		-0.176068	-0.136024	-0.203505	0.0646057	-0.0517055	0.0542517	0.030606	0.0714136	0.0248382	0.274919	0.884211
AAEL000454	isocitrate dehydrogenase	H12	0.950368	0.452514	0.451265	-0.00109938	-0.305536	-0.331822	-0.626193	-0.466188	-0.77173	1.7221	2.11e-12
AAEL000455	conserved hypothetical protein		-0.0100427	0.481228	0.0452687	0.208298	0.0890549	-0.0244994	-0.33971	-0.170416	-0.453147	0.934375	0.0574661
AAEL000456	conserved hypothetical protein		-0.0327533	0.466445	0.0201063	-0.0201063	0.0246214	-0.202604	-0.505737	-0.371881	-0.665559	1.132	0.0149016
AAEL000458	conserved hypothetical protein		0.523799	0.189723	0.453143	0.236783	-0.144778	-0.0231514	-0.383502	-0.370347	-0.440129	0.963928	5.56e-05
AAEL000459	conserved hypothetical protein	H3	-0.147033	1.18785	0.10521	0.0720236	0.0856647	-0.0998096	0.0100063	-0.0100063	0.283063	1.33489	5.65e-15
AAEL000460	conserved hypothetical protein		0.0159559	0.332828	0.373188	0.022703	-0.0144902	0.00995938	-0.0984437	-0.187114	-0.225341	0.598529	0.0117593
AAEL000461	conserved hypothetical protein		-0.236703	-0.543356	0.320229	0.145247	0.0755131	-0.0841167	-0.13008	-0.0925687	-0.243577	0.863585	0.00997466
AAEL000464	conserved hypothetical protein		-0.0149212	0.488831	0.0632047	-0.0355315	0.247221	-0.209109	0.180141	-0.193358	-0.263254	0.752085	0.298215
AAEL000465	conserved hypothetical protein		-0.347358	0.519569	0.16623	0.0948076	-0.16768	0.00862334	0.224257	-0.231086	0.0399652	0.866927	0.324428
AAEL000466	voltage and ligand gated potassium channel		0.158374	-0.747914	-0.324511	0.224861	-0.132513	-0.79134	0.264836	0.082219	-0.618395	1.05618	0.56979
AAEL000467	mitochondrial ribosomal protein, L49, putative		0.191879	0.695139	0.526334	-0.0225348	-0.0704717	0.0491872	-0.122912	0.196519	-0.205112	0.90025	0.000207216
AAEL000468			0.0775882	0.00756496	-0.196849	-0.0662419	0.20021	-0.0507022	-0.14001	-0.177638	-0.297766	0.497976	0.538034
AAEL000469	conserved hypothetical protein		0.581911	0.202465	0.109487	0.0324027	-0.0306798	-0.257671	-0.281724	-0.297895	-0.40316	0.985071	0.000375242
AAEL000470	hypothetical protein		0.614491	0.694935	0.367539	0.394231	0.244494	-0.23492	-0.225761	-0.708732	0.0547484	1.40367	0.0879587
AAEL000471	monocarboxylate transporter	H4	-0.0951742	1.12661	0.363376	-0.0070864	-0.00902651	0.0732818	0.087003	-0.12282	0.216732	1.24943	3.75e-07
AAEL000472	zinc finger protein, putative	H6	-0.0158144	0.235231	0.72251	0.25698	0.0385778	0.0158144	-0.0901447	-0.236581	-0.320449	1.04296	4.04e-05
AAEL000474	conserved hypothetical protein		0.159322	-0.0888204	0.0160618	0.0322582	-0.0592568	-0.34046	-0.301768	0.0092199	-0.214734	0.499783	0.875336
AAEL000475	conserved hypothetical protein		-0.538305	-0.0257044	-0.0997943	0.00504031	0.181995	0.0365801	0.0314426	0.016936	0.0760001	0.7203	0.787417
AAEL000476	conserved hypothetical protein		-0.302754	-0.0195114	-0.423801	0.112554	0.267434	0.193682	-0.0882589	0.785203	0.0840482	1.209	0.364076
AAEL000477	NADPH FAD oxidoreductase		-0.427115	-0.0744812	0.401092	0.0976013	0.302325	0.00284665	0.110601	0.191328	0.0467012	0.828207	0.538629
AAEL000478	Sm protein G, putative		-0.377812	0.234389	-0.00888813	-0.119669	0.097622	0.180556	-0.208861	0.0915068	-0.0716583	0.612201	0.63498
AAEL000479	conserved hypothetical protein		0	-0.0303481	-0.033438	-0.021461	0.280061	-0.0728493	-0.0221622	-0.0500167	0.026256	0.352911	0.999122
AAEL000481	rab3 interacting molecule		0.434299	-0.187125	-0.0327876	0.450466	0.176272	-0.0789713	0.0327876	0.0815893	-0.363407	0.813873	0.934815
AAEL000483	exostosin-2		-0.0286882	0.209391	0.131042	0.0286882	0.142071	-0.0315183	0.0461576	-0.0401106	0.0765747	0.249502	0.978665
AAEL000485	paramyosin, putative	H6	0.343057	0.408673	0.812946	0.549629	0.329958	-0.0380487	-0.223263	-0.357827	-0.455671	1.26862	6.73e-11
AAEL000486	chaperonin		0.155937	-0.542791	-0.339115	-0.0327594	0.0375925	0.132187	0.00405611	0.169419	0.208424	0.751214	0.00760963
AAEL000487	hypothetical protein		0.0970292	0.309548	-0.0348142	0.0936247	0.110621	-0.0936984	-0.016184	-0.182472	-0.0343315	0.49202	0.855225
AAEL000488	conserved hypothetical protein	H11	-0.454603	-0.452845	-0.147088	0.184005	0.0818967	0.244825	0.22307	0.36311	0.938831	1.39343	8.25e-08
AAEL000489	P21-activated kinase, pak		0.135702	0.00182662	-0.27255	-0.280697	0.107763	-0.00182662	0.03668	-0.0464307	0.105802	0.416399	0.869043
AAEL000491	hypothetical protein		-0.0259554	-0.0683867	0.134143	0.0114921	0.204595	-0.105817	0.16682	0.305162	-0.0114921	0.410978	0.906344
AAEL000493	heparan sulphate 6-o-sulfotransferase		0.165118	-0.125887	0.250944	-0.456053	-0.369022	-0.155304	0.100293	0.169194	0.0505656	0.706997	0.422986
AAEL000498	defective proboscis extension response, putative		-0.00829945	0.00829945	-0.111516	0.319965	0.26246	-0.329059	-0.372325	-0.274922	0.398112	0.770437	0.858407
AAEL000500	conserved hypothetical protein	H3	0.480379	3.9712	0.278452	-0.316538	-0.034852	-0.175949	-0.202571	0.514159	-0.194898	4.28774	6.51e-28
AAEL000502	NADPH FAD oxidoreductase		-0.0498194	-0.132015	-0.242895	0.0163393	0.180806	0.077941	0.212447	0.121827	0.23652	0.479415	0.810083
AAEL000503	hypothetical protein		0.00644784	0.0615819	0.0479417	-0.124744	-0.0696379	-0.0337416	-0.0140137	0.233653	0.0206521	0.358397	0.993913
AAEL000504	conserved hypothetical protein		0.274745	-0.915347	0.0013858	-0.170012	-0.170736	-0.275968	0.0681906	0.0973046	0.144429	1.19009	0.14381
AAEL000505	conserved hypothetical protein		-0.355792	-0.0460886	0.339659	0.230401	0.375835	0.0513958	-0.0129287	-0.0964922	0.0129287	0.731628	0.249034
AAEL000508	fibrinogen and fibronectin	H11	-0.424368	-0.361877	-0.494647	-0.0205532	0.74703	1.14129	1.2921	1.0387	1.41755	1.9122	1e-14
AAEL000509	rho GTPase activating protein		-0.0822005	0.319617	0.404567	0.579073	0.477338	-0.0544796	0.11877	-0.00780074	-0.0285747	0.661274	0.163535
AAEL000510	conserved hypothetical protein		-0.21583	0.286719	-0.0784988	0.0525366	0.141174	-0.044666	-0.147205	-0.305058	-0.247426	0.591777	0.091899
AAEL000511			-0.0059759	0.109023	0.103615	0.159832	0.251552	-0.106358	-0.137112	-0.0701123	-0.230079	0.481631	0.692458
AAEL000515	juvenile hormone-inducible protein, putative		-0.206846	-0.334872	-0.124579	0.0795012	0.433923	0.0251554	0.112485	0.159872	0.631477	0.966349	0.000988362
AAEL000516	juvenile hormone-inducible protein, putative		-0.382104	-0.034884	-0.212	-0.0656775	0.0250089	0.233561	0.207081	0.135429	0.194041	0.615665	0.14141
AAEL000519	hypothetical protein		0.325441	-0.229413	0.141811	-0.143269	-0.141811	-0.625789	0.269155	-0.282775	-0.189044	0.95123	0.908378
AAEL000520	conserved hypothetical protein	H5	-0.702703	-0.15979	0.105771	-0.0352688	0.0736069	-0.18442	0.0181856	-0.0181856	0.515698	1.2184	0.00226989
AAEL000522	hypothetical protein		-0.551397	-0.23542	-0.279854	0.126729	0.10209	-0.0531987	0.0838862	-0.25918	0.147664	0.699061	0.699308
AAEL000523	ring finger protein		0	-0.0672615	0.126119	0.101901	-0.130222	-0.135323	0.15714	0.0341831	-0.0986257	0.292463	0.972553
AAEL000524	regulating synaptic membrane exocytosis protein		-0.690125	-0.0580089	-0.0359678	0.116581	0.106921	-0.866262	0.0359678	0.234151	-0.43911	1.10041	0.786099
AAEL000527	polynucleotide kinase- 3'-phosphatase		-0.853493	0.00650459	-0.316733	0.0368791	-0.00317969	-0.311164	0.14801	0.152765	0.0139812	1.00626	0.664488
AAEL000529	conserved hypothetical protein	H12	0.972112	-0.541622	0.302377	-0.0417872	-0.304479	0.612714	-0.592416	0.902852	0.285949	1.56453	0.000501011
AAEL000530		H7	-0.0359476	-1.79934	0.272813	0.0229918	0.00668559	-0.0401006	0.196355	0.096	0.900759	2.7001	9.48e-21
AAEL000531	conserved hypothetical protein		-0.0554528	0.528679	-0.0437921	0.195477	0.087691	-0.160628	-0.179238	-0.163456	-0.264878	0.793556	0.00182919
AAEL000532	conserved hypothetical protein		0.00558548	0.660738	-0.386256	0.213641	0.442755	0.309988	0.735628	-0.00558548	-0.0798258	1.12188	0.701784
AAEL000533	C-Type lectin (CTL).	H14	0.727583	0.04005	0.144823	0.335168	-0.0895136	0.0765834	-0.327889	-0.248991	-0.640224	1.36781	6.69e-07
AAEL000536	conserved hypothetical protein		0.482688	-0.0258822	0.0012588	-0.0178325	-0.167363	-0.0012588	-0.149892	0.152506	0.00487799	0.650051	0.874204
AAEL000539	hypothetical protein		0.0206551	0.276575	-0.215406	-0.19537	-0.022629	-0.0111569	-0.0925162	0.0111569	0.148878	0.491981	0.892164
AAEL000540	fasciclin, putative		0.165799	0.215341	-0.234871	-0.0772472	-0.246373	-0.0720423	-0.153887	-0.0403533	0.162514	0.461714	0.313624
AAEL000541	fasciclin, putative		0.57193	-0.175014	-0.00875638	-0.0891979	-0.0356239	0.0399303	-0.21137	0.0454543	-0.00772601	0.7833	0.107921
AAEL000543	C-Type lectin (CTL) - mannose binding.		-0.33456	0.318604	0.323385	-0.419022	-0.541001	-0.14238	0.0272399	0.0355203	0.410421	0.951422	3.54e-08
AAEL000544	hypothetical protein		-0.945508	-0.54475	-0.394427	0.380676	-0.00878065	-0.259707	0.00878065	0.780916	0.112669	1.72642	0.322391
AAEL000545			-0.72122	-0.108929	0.101329	0.319858	-0.00319623	-0.0252018	-0.108206	-0.111946	0.00319623	1.04108	0.0326909
AAEL000546		H7	-0.119904	-2.46299	0.577494	0.289775	0.208981	-0.036523	-0.234003	0.0579457	0.115512	3.04048	4.78e-31
AAEL000549	fibulin 1 and		-0.0238892	-0.334887	0.0449438	-0.209917	-0.24415	0.205754	-0.0373822	0.269099	0.321803	0.65669	0.368115
AAEL000550	werner helicase interacting protein	H13	-0.510571	-0.768117	-0.488243	0.0632078	0.0108044	0.294033	0.248308	-0.0108044	0.239142	1.06215	2.72e-06
AAEL000551	hypothetical protein	H9	-0.123078	1.18402	-0.764833	-0.189282	-0.357015	-0.00510302	0.82928	0.434062	2.44144	3.20627	3.45e-37
AAEL000553	tropomyosin, putative		0.0846123	0.31298	-0.00104395	0.00657471	-0.0341484	0.00104395	0.0570205	-0.0126298	-0.177912	0.490892	0.6661
AAEL000556	C-Type lectin (CTL).	H12	0.533253	0.0601205	0.345436	0.216267	-0.04646	-0.163383	-0.727884	-0.70627	-0.776282	1.30954	1.11e-09
AAEL000557	conserved hypothetical protein		-0.332038	0.372066	0.0252521	-0.582082	0.0432516	-0.580619	0.0529703	0.278226	0.189685	0.954148	0.426237
AAEL000558	neural stem cell-derived dendrite regulator		0.202131	-0.539285	-0.0365084	-0.00645773	-0.141198	0.0835816	-0.0730307	-0.0116598	-0.160671	0.741416	0.447381
AAEL000559	glycosyl transferase		-0.0302596	0.722999	-0.152434	0.0433588	-0.0697708	0.00723213	-0.00723213	-0.145936	0.0149314	0.875433	8.86e-05
AAEL000561	hypothetical protein		0	0.0114637	0.0442183	0.180971	0.0742677	0.269901	-0.242317	0.0888749	-0.260826	0.530727	0.738286
AAEL000562	conserved hypothetical protein		0.0731019	0.604115	0.265118	0.0163679	0.271237	0.0270854	-0.0442587	-0.0227218	-0.091846	0.695961	0.0388196
AAEL000563	C-Type lectin (CTL) - mannose binding.	H7	1.61371	0.257813	1.38706	0.382681	0.158063	-0.723812	-0.158063	-0.172276	-0.746732	2.36044	1.26e-14
AAEL000564	myotubularin		0.00215132	0.504645	0.0624239	-0.0815434	-0.0654813	-0.0648484	-0.0567023	0.0198392	-0.0403077	0.586189	0.109504
AAEL000565	hypothetical protein		0.167797	-0.660635	-0.301482	-0.0592677	-0.178402	-0.0261925	0.173404	0.0799402	-0.0980289	0.834039	0.111544
AAEL000566	conserved hypothetical protein	H3	-0.0150306	2.38798	-0.10055	-0.221982	-0.343309	-0.287094	0.0150306	0.23523	0.764972	2.73129	3.37e-39
AAEL000567	Facilitated trehalose transporter Tret1	H6	-0.508667	-0.994081	0.920946	0.325939	0.300713	0.0621456	-0.00397954	0.027502	-0.0375454	1.91503	1.25e-13
AAEL000568	26S proteasome non-ATPase regulatory subunit		-0.237105	-0.12751	-0.0600882	0.0285497	0.156023	0.157036	0.107457	0.367757	0.333842	0.604862	0.452553
AAEL000569	omega-crystallin, putative		-0.504886	0.132226	0.0346807	0.206889	0.221055	-0.00858894	-0.0398673	0.0192157	-0.150265	0.725941	0.397181
AAEL000570	conserved hypothetical protein	H3	-0.342435	1.18862	-0.874815	0.00538605	0.172321	0.514256	0.840773	0.486859	0.373163	2.06343	1.02e-06
AAEL000571	hypothetical protein		-0.180574	0.319601	-0.15183	0.0546223	0.324474	-0.0215389	0.129859	-0.00633069	-0.000394059	0.505048	0.919456
AAEL000572	AMP dependent ligase		0.374302	0.438008	0.210147	-0.165563	-0.208461	-0.145416	-0.144714	0.042373	-0.0315163	0.646469	0.00735488
AAEL000573	conserved hypothetical protein		-0.157891	-0.81451	-0.188544	0.157891	0.380551	0.513763	0.265855	-0.29228	-0.712994	1.32827	0.469526
AAEL000574	conserved hypothetical protein		-0.126248	0.329992	-0.0742429	-0.0153752	0.0175451	-0.0306176	0.0793939	0.00103061	0.375648	0.501896	0.154725
AAEL000575	apyrase, putative		-0.288279	0.53017	0.0371821	0.365651	-0.0198597	-0.0992605	0.0198597	-0.220494	-0.0636651	0.818449	0.00959272
AAEL000576	lachesin, putative		0.0977024	-0.290275	-0.156604	0.0634288	0.108676	-0.217134	-0.199309	0.103989	0.0141562	0.398951	0.990938
AAEL000577	DNA binding protein elf-1		-0.0712927	-0.168064	-0.27691	0.049579	0.0802294	-0.185936	-0.0426453	0.0197268	-0.0775568	0.35714	0.852047
AAEL000578	conserved hypothetical protein		1.25104	0.188345	0.107234	-0.720246	-0.649774	0.153373	-0.209113	-0.428785	-0.289674	1.97129	0.297632
AAEL000579	conserved hypothetical protein		0.179531	0.400759	0.218391	-0.0466588	0.0738963	-0.181382	0.0466588	-0.127931	-0.154578	0.582141	0.43635
AAEL000581	conserved hypothetical protein		0.558109	0.741673	0.316926	0.130554	0.214326	-0.0327052	0.0182054	0.0283662	-0.12726	0.868933	0.00022128
AAEL000583	peroxisome assembly factor-2 (peroxisomal-type ATPase 1)		-0.191911	-0.452381	0.0658383	-0.036139	0.0130263	-0.0130263	0.10267	-0.101169	-0.0573226	0.555051	0.392785
AAEL000586	hypothetical protein		-0.0323821	-0.333248	0.0323821	0.548927	-0.0908735	-0.407625	-0.167215	0.427237	0.402131	0.956552	0.693823
AAEL000587	hypothetical protein		-1.35207	-0.257706	-0.0348795	0.536914	0.130692	-0.760119	0.0881318	-0.408153	0.0348795	1.88899	0.337293
AAEL000588	conserved hypothetical protein	H10	-0.0114419	0.3527	-0.666389	-0.419229	0.0183416	0.616683	0.389547	0.446923	0.291117	1.28307	0.00787437
AAEL000589	serine/threonine protein kinase		-0.428226	0.0179542	-0.092071	0.00446357	-0.156281	-0.105835	-0.0773142	-0.205884	-0.00427758	0.44618	0.954156
AAEL000590	Defenserepressor 1	H3	0.307937	1.09671	0.345273	0.226628	-0.0217944	-0.0355549	-0.280172	-0.101103	-0.212863	1.37689	6.55e-16
AAEL000591	hypothetical protein		0.58935	-0.416427	-0.0758378	-0.0357475	0.00023216	0.0208652	0.213236	0.142461	-0.0584148	1.00578	0.243361
AAEL000593	mitochondrial 18 kda protein (mtp18)	H4	-0.105115	0.972822	0.912238	0.55879	0.387503	0.213202	0.0278623	-0.154131	-0.41237	1.38519	3.27e-13
AAEL000594	conserved hypothetical protein		-0.158708	-0.493267	0.045527	0.232087	0.181938	0.0235738	-0.152006	-0.104993	-0.0235738	0.725354	0.100328
AAEL000595	beat protein		-0.748864	0.0935814	-0.0145237	0.0204578	0.00433354	0.129833	-0.148083	-0.0864988	-0.18559	0.878697	0.931659
AAEL000597	cadherin		0	-0.225585	-0.0704079	0.25499	-0.0944209	0.116996	0.0880535	-0.0368489	-0.0900958	0.480575	0.722716
AAEL000599	wingless protein, putative		0.0631338	-0.0242185	0.0681693	-0.303051	-0.249915	0.133024	-0.0713338	0.0194518	0.2474	0.550451	0.996363
AAEL000600	Wnt10a protein, putative		-0.113063	0.125383	-0.444865	-0.648781	0.093906	0.321134	0.10438	0.0834441	0.17512	0.969914	0.772324
AAEL000602	GPCR Orphan/Putative Class B Family		0.119141	0.172644	-0.0810224	-0.0950064	-0.0109211	-0.0706294	-0.249367	-0.190343	-0.247377	0.422011	0.835761
AAEL000604	hypothetical protein		-0.0426293	-0.202958	-0.0846543	0.481163	0.302541	-0.119115	0.0426293	-0.0656458	-0.090451	0.684121	0.347847
AAEL000605	rab geranylgeranyl transferase alpha subunit		-0.529206	0.181795	0.282948	-0.0121456	0.0178855	0.127096	0.0650961	-0.0363966	0.56225	1.09146	0.0880637
AAEL000607	hypothetical protein		-0.0168924	0.247257	-0.669225	0.0168924	-0.0640902	0.614908	0.336094	-0.415141	0.836981	1.50621	0.0351884
AAEL000608	conserved hypothetical protein		0.302441	0.321491	-0.256738	0.119402	0.0945574	-0.0627088	-0.0330552	-0.193442	-0.0458801	0.57823	0.118477
AAEL000609	conserved hypothetical protein	H7	0.865547	-2.09478	0.125752	-0.239203	-0.199044	0.0697253	-0.0323206	-0.510949	-0.508334	2.96033	1.08e-05
AAEL000610	hypothetical protein	H3	0.809732	1.21631	-0.538736	-0.607841	0.00964499	-0.00964499	-0.373388	-0.235435	0.109074	1.82416	2.39e-05
AAEL000611	Cecropin, Anti-Microbial Peptide.	H10	0.539347	-0.100976	-2.53264	-1.07202	-0.942741	-0.323668	0.588721	0.667886	0.272988	3.20053	2.72e-11
AAEL000612	hypothetical protein		-0.0577092	-0.718019	-0.677584	-0.332948	-0.462532	0.246668	0.0577092	0.370609	0.360032	1.08863	0.0150752
AAEL000615	hypothetical protein	H11	-0.71357	-0.332697	-0.153824	0.0967605	-0.294651	0.148522	0.183615	-0.928383	0.279152	1.20753	0.000113311
AAEL000617	carbonic anhydrase		0.637435	0.495664	0.00515948	-0.422535	0.0556163	-0.688867	0.170521	0.266973	-0.00515948	1.3263	0.556096
AAEL000618	wingless protein, putative		-0.440017	0.481327	-0.585394	-0.188296	0.258193	-0.0883342	0.0532818	0.160846	0.157833	1.06672	0.474717
AAEL000620	hypothetical protein		-0.0395553	0.572425	0.0946483	-0.197355	0.0395553	-0.086081	-0.122262	0.103206	0.180044	0.769781	0.00776488
AAEL000621	Cecropin,Anti-Microbial Peptide.	H14	1.13371	0.0200461	-2.0237	-1.32687	-0.744884	-0.0657842	-0.0200461	0.843165	0.460028	3.15741	1.45e-06
AAEL000622	conserved hypothetical protein		-0.119848	0.0981387	-0.248259	-0.0812363	0.0868797	-0.00738645	0.0341802	-0.0317728	0.0601556	0.346398	0.876331
AAEL000624	rho-gap 92b		-0.118572	0.556846	-0.141667	-0.035096	-0.143268	-0.0735762	0.220008	0.139943	0.267812	0.700114	0.0257388
AAEL000626	hypothetical protein	H7	0.0853675	-2.50271	0.477234	-0.295735	0.0927855	-0.0539613	-0.138334	0.72155	-0.126688	3.22426	2.11e-09
AAEL000629	adenylate kinase 3,	H6	-0.68764	-1.59829	1.68138	0.263294	-0.030673	-0.117675	0.030673	0.330966	0.557695	3.27967	3.27e-58
AAEL000630	cardioacceleratory peptide 2a, putative		0.159158	-0.101761	0.0181001	-0.144235	-0.00746327	-0.203096	0.00746327	0.249912	0.433596	0.636692	0.973319
AAEL000632	WNT4 precursor, putative		-0.337588	0.301687	0.0989372	-0.558854	0.454453	0.286228	-0.515273	-0.305282	0.488549	1.0474	0.489464
AAEL000634	ceramide glucosyltransferase		0.0394454	-0.136708	0.131068	-0.210294	0.00104679	0.0359043	0.0914369	0.208436	0.620793	0.831086	0.0520198
AAEL000635	cop9 complex subunit 7a		0.0553439	0.281515	0.208027	-0.0430804	0.0786761	0.000545264	-0.173667	-0.0250736	-0.182781	0.464296	0.259486
AAEL000636	conserved hypothetical protein	H9	-0.153674	0.477034	0.0468284	0.514816	0.349622	0.127623	0.954349	0.758901	1.6775	1.83117	3.37e-18
AAEL000638	hypothetical protein	H2	-0.0594667	0.0822513	0.318962	-0.0849302	0.386317	0.0188092	-0.177713	-0.342377	-0.832514	1.21883	3.52e-08
AAEL000639	n-acetylgalactosaminyltransferase		-0.121872	-0.440203	-0.0148158	-0.421721	0.0148158	0.116925	0.102192	0.506368	0.534725	0.974927	0.00646629
AAEL000640	alanine-glyoxylate aminotransferase		-0.145034	-0.32739	0.562452	0.0621549	-0.0982935	0.03012	0.189503	0.00310269	-0.0941104	0.889842	0.000326474
AAEL000641	protein disulfide isomerase	H3	0.538649	1.32678	-0.324549	-0.311344	-0.177736	0.0401233	0.0382873	-0.0149783	0.388307	1.65133	5.21e-20
AAEL000642	alpha-amylase	H3	0.214595	1.75994	0.0155139	0.073397	-0.0155139	-0.258547	-0.430141	-0.580916	-1.13509	2.89503	3.58e-72
AAEL000643	zinc finger protein		0.049472	0.36288	0.14686	-0.0507773	0.0596154	0.131918	-0.089883	-0.0131363	-0.294577	0.657457	0.290095
AAEL000644	conserved hypothetical protein		0.503117	-0.489698	0.228672	-0.131365	0.0102876	0.0450929	-0.141909	0.0996913	-0.225306	0.992815	0.0653558
AAEL000645	hypothetical protein		-0.505177	-0.574788	-0.259422	0.122883	-0.00149724	0.145116	0.00149724	-0.0215771	0.272397	0.847185	0.133558
AAEL000647	predicted protein		0.109581	0.231237	0.154872	-0.218352	-0.0897929	-0.0126457	-0.195075	0.0098943	-0.0637592	0.449589	0.952952
AAEL000649	conserved hypothetical protein		0.0137894	-0.689894	-0.285822	0.0499285	-0.115459	-0.0463381	0.0862556	0.105863	0.0972216	0.795756	0.0335688
AAEL000650	conserved hypothetical protein	H7	0.862593	-0.463027	0.725039	0.0606426	-0.0426943	-0.0428689	-0.021677	0.179159	0.329895	1.32562	1.19e-05
AAEL000651	alpha-amylase	H2	0.736408	1.03932	0.700482	0.068032	-0.0377938	-0.152981	-0.634364	-0.052341	-0.413414	1.67368	2.99e-06
AAEL000652	Gram-NegativeBinding Protein (GNBP), or Beta-1,3-Glucan Binding Protein (BGBP).		0.316251	0.300747	0.0779307	-0.00404474	0.13764	-0.352654	-0.500429	-0.069658	-0.28792	0.81668	0.46934
AAEL000653	zinc carboxypeptidase	H6	0	0.92755	2.61483	2.25217	1.34132	1.32543	0.310697	0	0	2.61483	2.7e-07
AAEL000654	n-acetylgalactosaminyltransferase		-0.174354	-0.337865	0.123908	-0.078922	-0.1424	0.0765158	0.220759	0.327562	0.12644	0.665427	0.335519
AAEL000655	conserved hypothetical protein		0.0856944	0.160666	0.104679	-0.0508187	0.270594	0.257715	0.0131096	-0.0131096	-0.193155	0.46375	0.582031
AAEL000656	pangolin		-0.386613	-0.224429	-0.0897474	0.285784	-0.0182448	0.0625596	0.190686	0.00101746	0.0277855	0.672397	0.81998
AAEL000657	hypothetical protein		0	0.129033	0.31803	0.297513	0.414418	0.455682	-0.00603121	0.224013	0.175496	0.461714	0.660686
AAEL000658	conserved hypothetical protein		-0.398918	-0.282294	0.510289	0.109774	-0.199366	0.246442	-0.0740915	-0.37011	-0.546981	1.05727	0.0728214
AAEL000659	exosome complex exonuclease rrp43 (ribosomal RNA processing protein 43)		0.16691	-0.797274	-0.462665	0.0509383	-0.00467168	0.16112	0.00467168	-0.0340952	0.0953624	0.964184	0.0329398
AAEL000660	peptide methionine sulfoxide reductase, putative	H3	0.0139994	1.78707	0.202624	-0.00860461	0.137887	0.213405	-0.0107305	-0.0233444	-0.0721891	1.85926	6.57e-21
AAEL000662	conserved hypothetical protein	H10	1.2871	1.19123	0.257925	0.0261878	-0.175234	-0.162905	0.175521	0.0325968	0.481241	1.46233	0.0027837
AAEL000663	conserved hypothetical protein		-0.0321512	-0.0816971	0.267167	-0.107051	0.140331	0.0321512	-0.0780738	-0.291983	-0.690151	0.957318	0.000117237
AAEL000666	pmp22 peroxisomal membrane protein, putative		-0.266854	0.0720263	-0.0276972	0.109494	0.404961	-0.0025257	-0.0521198	-0.185088	-0.179425	0.671815	0.128072
AAEL000667	alpha-amylase		0.146315	0.373182	0.383771	-0.00729141	0.0257317	-0.0679018	-0.272071	-0.192937	-0.293001	0.676772	0.194448
AAEL000668	conserved hypothetical protein	H7	0.772277	-0.584054	0.844757	0.0957054	0.226563	-0.14447	0.0799305	0.261188	0.783905	1.42881	9.19e-07
AAEL000670	methionine sulfoxide reductase	H3	1.13961	3.41214	1.21355	0.772734	0.247643	-0.301445	-0.450046	-0.266262	-0.43592	3.86219	1.53e-145
AAEL000671	Toll-likeReceptor.		0.268422	-0.107791	-0.00738844	0.0657025	-0.0173413	-0.163019	-0.0373961	-0.231971	-0.133319	0.500393	0.984537
AAEL000672	cyclin a		-0.311632	-0.463635	-0.0424579	0.0404603	0.212272	-0.0294448	0.0285219	0.0358855	0.00794391	0.675908	0.168942
AAEL000673	conserved hypothetical protein		-0.389457	0.131212	0.0795462	0.0708601	0.0396241	-0.0792103	0.0110748	-0.161387	-0.0110748	0.520668	0.860623
AAEL000674	RNA m5u methyltransferase	H13	-0.245321	-1.11263	-0.400374	0.00308838	0.0928818	0.146868	0.10058	0.00610949	0.240873	1.3535	1.75e-06
AAEL000676	hypothetical protein		-0.178169	0.441414	0.120309	0.086158	-0.0372473	0.301464	0.0148027	-0.225134	-0.220003	0.666548	0.764095
AAEL000677	DNA-directed RNA polymerase subunit rpb8		0.103561	-0.552012	-0.0661803	-0.00327746	0.183226	0.22202	0.0321849	0.262729	0.209995	0.814741	0.122766
AAEL000678	alpha-amylase	H4	0	2.14658	1.51686	0.570618	-0.588351	-0.406742	-0.633019	-0.824075	-0.475404	2.97065	7.78e-27
AAEL000679	NEDD8, putative		-0.0446146	0.0906528	-0.0678069	-0.00484439	0.0879058	0.214372	0.244031	0.131682	0.139481	0.311838	0.933607
AAEL000682	hypothetical protein		-0.115992	0.146565	-0.286987	0.00334128	-0.057604	-0.167709	-0.0561643	-0.176361	-0.159529	0.433552	0.77172
AAEL000685	conserved hypothetical protein		0.268021	-0.533258	0.02749	-0.0927949	0.183049	-0.0748773	0.0569689	0.265824	0.0524837	0.801279	0.176056
AAEL000687	glucosyl/glucuronosyl transferases		0.0567119	-0.0492031	-0.0905694	-0.101933	-0.159481	0.275039	0.0760876	0.503021	0.500911	0.662502	0.0545827
AAEL000689	steroid dehydrogenase		0.247484	-0.00463392	0.165191	0.00463392	0.0154082	-0.382028	-0.149851	-0.383479	-0.24928	0.630964	0.6088
AAEL000690	steroid dehydrogenase		0.476078	-0.0564742	0.248315	-0.0219555	-0.397968	0.120998	0.10777	-0.526466	-0.259901	1.00254	0.288054
AAEL000691	conserved hypothetical protein		0	0.308742	-0.0200803	0.14042	-0.222937	-0.00332021	0.0975166	-0.439089	-0.399871	0.74783	0.826859
AAEL000692	partner of sld5		0.523177	0.427436	0.0695504	-0.235209	0.00122751	-0.405129	-0.0246027	0.31087	0.0484816	0.928305	0.48584
AAEL000693	fkbp-rapamycin associated protein		-0.33569	-0.0876623	-0.126671	0.0889037	-0.0280301	0.0280301	-0.0637717	-0.0598191	-0.136882	0.424593	0.903008
AAEL000695	conserved hypothetical protein		0.34244	-0.51904	-0.012323	0.0201727	-0.258449	0.00673074	0.0305217	0.12092	-0.177364	0.861481	0.412668
AAEL000696	hypothetical protein		0	-0.69845	-0.158375	-0.116529	-0.129256	-0.126957	0.145353	0.178915	0.200738	0.899188	0.00544747
AAEL000697	hypothetical protein		-1.80964	0.123665	-0.339475	0.0878242	-0.120887	0.170285	0.163464	0.207532	0.0442083	2.01717	0.471227
AAEL000699	conserved hypothetical protein		1.11176	-0.421663	-0.14813	-0.320886	-0.264545	0.429041	-0.00421158	0.709007	0.242762	1.53342	0.26725
AAEL000700	cadherin		-0.0362955	0.158448	-0.297042	0.00115346	-0.140451	0.185454	-0.404046	-0.00115346	0.1227	0.5895	0.957046
AAEL000702	hypothetical protein		-0.504028	0.385149	0.335907	0.179308	0.198698	0.146301	0.100453	0.00689689	0.0500709	0.889177	0.0886401
AAEL000703	glycogen phosphorylase	H5	0.359879	1.25881	1.68304	0.379944	-0.0534377	-0.251654	-0.533326	-0.394532	-0.789336	2.47238	7.51e-43
AAEL000704	synaptotagmin,		0	-0.133362	-0.0682805	0.119796	0.0142698	-0.10075	-0.054908	-0.272506	-0.25092	0.392302	0.881025
AAEL000705	steroid dehydrogenase		-0.320244	-0.146649	0.818241	0.00210254	-0.0710841	-0.0589448	0.0304115	0.0102217	-0.393441	1.21168	0.0357321
AAEL000706	serine palmitoyltransferase	H9	-0.0576687	0.428948	-0.394325	-0.146631	-0.0498819	0.018121	-0.018121	0.0716828	0.63178	1.02611	4.56e-05
AAEL000707	cell cycle control protein cwf22		-0.336992	-0.513165	-0.331299	0.114299	-0.134333	0.134884	0.0948685	0.0118722	0.131375	0.648049	0.00653468
AAEL000708	hiv-1 rev binding protein		0.364338	-0.838027	-0.325199	0.0532223	0.144337	-0.0155717	-0.0334563	-0.120288	0.109982	1.20237	0.0136751
AAEL000709	TOLLpathway signalling.		0.191526	-0.139802	-0.242224	-0.21378	0.029834	-0.0195912	0.0195912	0.115464	0.220318	0.462542	0.857265
AAEL000711	hypothetical protein	H12	1.14333	0.698229	0.327989	-0.180379	-0.394611	-0.38422	-0.497289	-0.635715	-0.472512	1.77904	4.64e-22
AAEL000712	hypothetical protein		-0.0129782	-0.662008	-0.0838947	-0.116944	-0.0803077	-0.0258098	0.0937663	0.166673	0.109897	0.828681	0.0911106
AAEL000713	reticulon/nogo		0.421716	0.398847	0.0394734	-0.157579	0.0771102	-0.242608	-0.506072	-0.372115	-0.475419	0.927787	0.000134243
AAEL000714	sodium-dependent excitatory amino acid transporter	H13	0.865908	-0.30741	-0.000525895	0.03106	0.0800212	0.000525895	-0.167096	-0.440795	-0.313542	1.3067	1.24e-06
AAEL000715	zinc finger protein		0.517363	-0.168399	0.297616	0.0345603	-0.0467825	-0.0375741	0.101765	0.194851	-0.0837684	0.685762	0.807263
AAEL000716	chondroitin 4-sulfotransferase		0.367709	0.180635	0.499756	0.0151828	0.147751	-0.0607758	-0.145112	-0.176291	-0.449922	0.949677	8.51e-05
AAEL000718	virus-induced RNA, putative		-0.470344	-0.00132207	0.4898	0.34169	0.279237	0.241047	0.35055	0.20427	0.311246	0.960144	0.09212
AAEL000719	pak-interacting exchange factor, beta-pix/cool-1	H2	0.715484	0.743902	0.141399	-0.061382	-0.120491	-0.107905	-0.145046	-0.262026	-0.293328	1.03723	1.51e-09
AAEL000720	Mediator of RNA polymerase II transcription subunit 11 (Mediator complex subunit 11)		0.145633	-0.198216	0.019148	-0.224814	0.295235	0.121868	-0.0547425	0.156024	-0.0361805	0.52005	0.857387
AAEL000721	hypothetical protein		0.234289	0.020732	-0.0516912	-0.154024	0.0384899	-0.318781	-1.13123	0.155933	0.194194	1.36552	0.613154
AAEL000722	conserved hypothetical protein		-0.0695374	0.290973	0.315471	-0.00715461	-0.0149467	0.211762	0.0248452	0.103802	-0.142563	0.458033	0.679707
AAEL000723	hypothetical protein		-1.01954	-0.206049	-0.510867	0.000842054	-0.142887	-0.314529	0.634079	0.0938692	-0.270039	1.65362	0.5235
AAEL000724	conserved hypothetical protein		-0.00295198	0.0245548	0.0996285	0.0357143	0.00295198	0.130798	-0.035955	-0.0616273	-0.239152	0.369949	0.952176
AAEL000726	fibrinogen and fibronectin	H13	0.667503	0.0262022	0.197034	0.478161	-0.0262022	-0.201852	-0.608735	-0.845774	-0.978048	1.64555	2.78e-16
AAEL000727	hypothetical protein		-0.354113	-0.230492	0.113335	0.364705	0.00618985	0.101928	0.193972	0.150187	-0.00618985	0.718818	0.761179
AAEL000728	ribosomal protein S6 kinase	H7	-0.39341	-1.54107	0.038476	0.146569	-0.0197153	-0.200981	0.0173647	-0.306914	-0.24794	1.68764	0.000278756
AAEL000729	hypothetical protein	H3	0.836744	1.34338	0.189987	0.065656	-0.122388	-0.160208	-0.0439383	-0.239958	-0.262939	1.60631	1.24e-12
AAEL000730	conserved hypothetical protein		-0.0816025	0.331586	0.138886	0.111166	0.0973061	0.186271	0.214094	0.0874624	0.00216427	0.413189	0.837806
AAEL000731	hypothetical protein		0.205977	0.0124439	0.280118	-0.134826	0.236401	-0.237162	-0.278036	-0.171272	-0.108104	0.558155	0.241315
AAEL000732	conserved hypothetical protein	H13	0.432683	-0.394525	0.123658	0.224941	0.0984489	-0.0853087	-0.444516	-0.550338	-0.58481	1.01749	6.1e-05
AAEL000733	hydroxysteroid dehydrogenase	H7	0.705784	-3.09905	0.374994	0.00357876	-0.00357876	0.292294	-0.0929266	-0.171633	-0.540504	3.80483	4.3e-30
AAEL000735	acyl-CoA oxidase		-0.216593	-0.445275	0.383055	-0.0707833	0.0147047	-0.0213789	-0.00231252	0.328344	0.216027	0.82833	0.0048015
AAEL000737	rab6 GTPase activating protein, gapcena (rabgap1 protein)		-0.109957	0.11229	-0.101794	0.0603638	0.100448	-0.0913764	-0.0317704	-0.00163058	-0.032256	0.222246	0.975057
AAEL000738	conserved hypothetical protein		0.190271	0.071803	0.269329	-0.105408	-0.0591044	-0.152472	-0.0917547	0.0336347	-0.0336347	0.421801	0.610225
AAEL000741	ecdysone-induced protein 74EF (ETS transcription factor E74A)	H3	0.228327	2.68347	-0.437359	-0.387226	-0.487609	-0.255242	0.112815	0.0953932	-0.0837072	3.17108	8.9e-44
AAEL000744	troponin C	H7	-2.81885	-3.26734	-1.21366	-0.609187	0.0519032	0.441537	0.553877	1.22277	1.52346	4.7908	1.75e-124
AAEL000745	hypothetical protein	H3	-0.0750353	2.70486	0.0179717	-0.00593578	-0.435314	-0.204499	-0.497575	0.122351	-0.21628	3.20243	1.37e-36
AAEL000746	NADP-specific isocitrate dehydrogenase	H3	-0.0851274	1.8249	0.0927807	-0.247917	-0.263645	0.0595633	0.0398439	0.267196	0.0334221	2.08854	1.82e-35
AAEL000747	conserved hypothetical protein		-0.225354	-0.44447	-0.172941	0.0676141	0.0855879	0.0285488	0.124966	0.14531	-0.0577197	0.58978	0.644796
AAEL000748	conserved hypothetical protein	H13	1.03477	-0.460215	0.511267	0.636155	0.198439	-0.0381885	-0.687334	-0.702062	-0.879369	1.91414	1.48e-14
AAEL000749	conserved hypothetical protein	H13	0.453789	-0.070837	0.381233	0.555581	-0.0571023	-0.132675	-0.490031	-0.592196	-0.725347	1.28093	7.24e-10
AAEL000750	hypothetical protein		0.14789	-0.341785	-0.0343988	-0.0916097	-0.00124483	0.0351122	0.0280784	0.186709	0.100572	0.528494	0.57858
AAEL000752	conserved hypothetical protein		-0.151565	0.773153	0.162971	-0.0771905	0.0776211	-0.0295544	-0.00734769	-0.035514	-0.0242509	0.924718	7.28e-06
AAEL000753	conserved hypothetical protein	H2	0.512768	1.15617	0.194275	-0.163321	-0.110408	-0.54078	-0.667252	-0.719233	-1.33524	2.49141	5.95e-28
AAEL000755	conserved hypothetical protein		-0.602076	-0.578818	-0.542548	0.0343246	0.396761	0.0745123	-0.0343246	-0.620481	0.103886	1.01724	0.376001
AAEL000757	anterior fat body protein		-0.213495	0.400774	0.686185	-0.043027	-0.0162025	-0.24686	-0.170769	-0.11613	0.113607	0.933045	9.66e-05
AAEL000758	ubiquitin-activating enzyme E1		-0.24978	-0.213138	0.0444889	0.14077	0.11792	0.0815125	0.111791	0.187222	0.29523	0.54501	0.363528
AAEL000759	gamma-glutamylcysteine synthetase, putative	H9	-0.696307	0.62453	-0.372013	0.0282627	0.0174557	0.183228	0.115613	0.152107	0.735361	1.43167	4.52e-12
AAEL000760	Clip-domain serine protease, family B.		-0.274575	0.663145	-0.0133142	-0.119457	0.055845	-0.0138821	-0.136664	0.0970031	0.294903	0.93772	0.0292125
AAEL000761	hypothetical protein		-0.0567938	-0.0838066	0.164328	0.260362	0.355417	0.0969373	-0.210987	0.0342759	0.052844	0.566404	0.66563
AAEL000762	lumican, putative		0.017521	-0.499481	-0.345729	0.215479	-0.0631558	0.0265196	-0.488893	0.0812945	-0.00885073	0.714961	0.236245
AAEL000763	Plenty of SH3s, putative		-0.259082	0.000264622	-0.000264622	0.112383	0.0384955	-0.0386862	0.0159851	-0.0230671	-0.146757	0.371465	0.995629
AAEL000765	hexamerin 2 beta	H6	-0.379067	-0.320675	1.31063	0.764849	0.884418	-0.681189	-0.723095	-0.129737	-2.15998	3.47062	6.06e-18
AAEL000766	ubiquinol cytochrome C oxidoreductase-subunit 6.4kD-subunit, putative	H12	1.50258	0.660004	0.882478	0.211159	-0.00938839	0.00938839	-0.806762	-0.501109	-1.01056	2.51314	2.42e-25
AAEL000767	phospholipid-transporting ATPase 1 (aminophospholipid flippase 1)		-0.162513	0.207454	-0.00590914	0.0247622	0.0675001	0.00437947	0.0800237	0.153988	0.0656413	0.369967	0.924945
AAEL000768	conserved hypothetical protein		-0.928486	-0.120543	-0.0617766	0.0894674	0.310195	0.128552	0.0386714	0.242093	0.0819805	1.23868	0.6661
AAEL000770	platelet-activating factor acetylhydrolase isoform 1b alpha subunit		0.324557	0.00103796	-0.00103796	0.025574	-0.105443	-0.156764	-0.13878	-0.147789	-0.272274	0.596831	0.522708
AAEL000771	hypothetical protein		-1.37011	-0.400373	-0.12287	0.563125	0.0344008	-0.0273666	0.0650374	0.628107	0.967191	2.3373	0.110289
AAEL000772	conserved hypothetical protein		-0.00194283	-0.249909	0.167844	0.00194283	0.413176	0.16526	-0.234389	0.313689	0.112236	0.663085	0.972707
AAEL000773	kinesin heavy chain		-0.718004	0.00907939	0.499248	-0.00907939	0.493009	-0.0720649	-0.0562944	-0.229416	0.422868	1.21725	0.836526
AAEL000774	conserved hypothetical protein		0.344155	0.669374	0.52916	-0.0223388	-0.067369	-0.12658	-0.206477	-0.193487	0.0659318	0.87585	9.45e-07
AAEL000778	conserved hypothetical protein	H5	-0.620188	0.229436	0.734497	-0.00574467	0.166262	-0.039976	-0.433724	-0.46822	-0.714214	1.44871	1.72e-05
AAEL000780	amino acid transporter		0.263621	0.116709	0.0426864	-0.00436695	-0.178574	-0.0583799	-0.340427	-0.318751	-0.35007	0.613691	0.578511
AAEL000782	conserved hypothetical protein		0.0734015	-0.701539	0.076638	-0.0611734	0.0611734	0.287571	0.0905502	0.266427	0.253252	0.98911	0.0176067
AAEL000783	conserved hypothetical protein		0.0377075	0.272922	0.0272141	0.00666552	-0.333429	-0.17729	-0.00666552	-0.169969	-0.196348	0.606351	0.954156
AAEL000784	hypothetical protein		0.0688458	-0.0820755	-0.221783	0.15768	-0.0148125	0.0072943	0.134316	-0.0802206	-0.0940107	0.379463	0.967165
AAEL000785	conserved hypothetical protein		-0.175501	0.2301	-0.160869	0.00964535	0.0617701	-0.0155114	-0.00964535	0.0296327	0.0254574	0.405601	0.973864
AAEL000786	hypothetical protein	H4	-0.0072304	1.19018	0.207038	0.0632054	-0.0690365	-0.331426	-0.190285	-0.173248	0.276861	1.52161	2.65e-14
AAEL000787	Ubiquitin carboxyl-terminal hydrolase calypso (EC 3.4.19.12)(BAP1 homolog)		0.375476	-0.176876	-0.00856903	-0.108439	-0.116902	-0.221433	0.118867	0.0233186	0.0264306	0.59691	0.961242
AAEL000788	matrix metalloproteinase		0.179732	0.0582539	0.0292252	-0.248616	-0.0624809	-0.114005	-0.136251	0.00290114	-0.00290114	0.428348	0.995094
AAEL000789	hypothetical protein		-0.0488188	0.0847929	-0.0364368	-0.00451066	0.201866	0.00451066	-0.287874	-0.152421	0.186576	0.48974	0.92222
AAEL000790	conserved hypothetical protein		1.03413	-0.674465	0.0976784	0.149417	-0.48242	-0.641065	-0.384912	-0.777244	-0.0289872	1.81138	0.296529
AAEL000791	hypothetical protein	H2	0.692554	0.993881	0.718929	0.0763699	-0.00478462	-0.0876856	-0.295604	-0.180891	-0.412496	1.40638	4.75e-17
AAEL000792	conserved hypothetical protein		0.00230926	-0.148213	0.58603	-0.346776	0.680786	-0.00230926	0.401573	0.386805	0.756538	1.10331	0.632149
AAEL000793	venom allergen	H13	0.632418	-0.458714	0.227456	0.210069	-0.00152747	0.00152747	-0.203111	-0.420163	-0.440404	1.09113	0.00066139
AAEL000794	Protein KIAA0664 homolog		0.369967	0.370653	0.230782	-0.0749774	-0.00787042	-0.162461	-0.3128	-0.198228	-0.423283	0.793937	0.00111368
AAEL000797	dimethylaniline monooxygenase	H4	0.16143	1.65242	0.197413	-0.403077	-0.322502	0.318348	-0.231135	-0.714422	-0.736533	2.38895	1.52e-07
AAEL000798	sterol regulatory element binding protein cleavage-activating protein (srebp cleavage-activating protein) (scap)		-0.0425303	-0.16944	-0.304414	0.0815583	-0.173822	-0.014777	-0.0644463	-0.0422304	0.014777	0.385972	0.74476
AAEL000800	microsomal dipeptidase		0.568206	-1.32315	0.0559941	0.277399	0.00360992	-0.178621	-0.289949	0.0776928	0.241283	1.89136	0.0123137
AAEL000802	conserved hypothetical protein		-0.419963	-0.017388	-0.188657	0.0759047	0.0379934	0.197924	0.234759	0.128537	0.241149	0.661111	0.0945848
AAEL000803	conserved hypothetical protein		0.171938	0.392314	-0.128344	-0.315233	-0.373966	-0.226947	0.267129	0.0715636	0.0252178	0.76628	0.587152
AAEL000804	conserved hypothetical protein		-0.0716311	-0.290885	0.154775	0.296152	0.107404	0.313987	-0.0424817	0.11339	-0.0339311	0.604872	0.248596
AAEL000805	conserved hypothetical protein		-0.548231	-0.163742	0.381073	0.0301616	0.140238	0.0117988	0.435837	0.229038	0.598339	1.14657	0.0414345
AAEL000806	hypothetical protein		-0.792486	0.0347598	0.483051	0.340121	0.147092	0.454131	-0.130719	0.248166	0.461118	1.27554	0.890482
AAEL000807	tetratricopeptide repeat protein, putative	H4	-0.628054	0.638663	0.179922	-0.0169204	0.142458	0.144661	0.0231105	-0.0889807	0.206443	1.26672	2.92e-05
AAEL000809	conserved hypothetical protein		-0.822887	0.463894	-0.143015	-0.105136	0.0281014	-0.066115	0.211853	-0.0145212	0.0145212	1.28678	0.243051
AAEL000810	protein kinase c		0.0383235	-0.0164992	-0.150315	0.0360245	-0.100035	-0.0893332	0.0946854	0.121376	-0.169843	0.291219	0.987233
AAEL000811	GPCR Methuselah Family	H13	-0.461337	-1.09225	-1.09548	-0.552557	0.168635	0.189795	0.16919	0.495095	1.05936	2.15484	4.77e-05
AAEL000812	conserved hypothetical protein		0.0863069	0.168215	-0.00540765	0.00536616	0.0889219	0.214832	-0.125773	-0.160277	-0.215973	0.430805	0.409705
AAEL000815	conserved hypothetical protein		0	0.301084	0.229331	-0.00687364	0.0868978	-0.0879225	-0.0151578	0.0904075	0.0990742	0.389007	0.608861
AAEL000816	carbonic anhydrase	H7	0.46599	-0.92801	0.800932	-0.0595786	-0.115068	-0.124256	-0.131435	0.0663338	-0.25657	1.72894	3.86e-14
AAEL000817	rhomboid		-0.717864	0.252396	0.239832	-0.102709	-0.0254664	0.0254664	-0.250024	-0.300478	0.178922	0.97026	0.096652
AAEL000819	hypothetical protein	H6	-0.554221	-0.632046	0.246351	0.0217235	0.059767	-0.128685	0.266174	0.0438515	0.512733	1.14478	0.000534758
AAEL000820	dimethylaniline monooxygenase	H4	-0.0601062	1.66324	0.972464	0.104449	0.0442173	0.0621044	-0.449836	-0.134274	-0.3439	2.11307	1.62e-10
AAEL000822	kinesin-like protein KLP68D		-0.311516	0.17358	-0.121071	0.0742734	-0.100579	0.192812	0.110719	-0.0103774	0.0922015	0.504327	0.744077
AAEL000823	ribosomal protein L35A, putative		0.603301	-0.226997	-0.38944	-0.297258	-0.245617	0.304215	0.129063	0.404629	0.138946	0.992741	0.0212392
AAEL000824	hypothetical protein	H3	0.121018	1.52028	-0.0152453	0.0638661	0.0552929	-0.0713918	-0.0847816	0.107164	-0.0549324	1.60506	3.71e-33
AAEL000825	eukaryotic peptide chain release factor GTP-binding subunit (erf2) (translation release factor 3) (erf3) (erf-3)		-0.381028	0.0231178	-0.0210072	0.194466	0.134134	0.4204	0.547515	0.0682735	0.0098449	0.928543	0.0273262
AAEL000828	vitellogenin,, putative		-0.0199504	-0.835265	0.201784	0.0348395	0.0947881	-0.698759	0.0704795	0.0199504	0.624279	1.45954	0.203762
AAEL000829	dimethylaniline monooxygenase		0.192018	-0.208055	0.0490478	0.0439402	0.284091	-0.00507721	-0.0612674	-0.0202353	-0.108655	0.492146	0.538609
AAEL000832	cleavage and polyadenylation specificity factor cpsf		-0.127416	-0.677026	-0.143281	0.0976095	0.136292	-0.115677	0.0703801	-0.00434537	0.064712	0.813318	0.00410454
AAEL000834	dimethylaniline monooxygenase	H3	0.00869616	1.30321	0.0264258	-0.166015	-0.136857	-0.211388	-0.0962255	-0.00869616	0.283594	1.5146	3.34e-13
AAEL000836	spermatogenesis associated factor		-0.436321	-0.577296	-0.0174967	0.0741242	0.00807906	-0.0513052	0.0774018	0.074214	0.0747826	0.654698	0.312693
AAEL000838	hypothetical protein	H13	-0.178257	-0.900495	-0.314226	0.094387	-0.0418155	0.10528	0.036129	-0.036129	-0.14501	1.00578	3.66e-06
AAEL000839	O-fucosyltransferase, putative	H3	-0.718268	0.50095	-0.656828	-0.03135	0.389431	0.03135	-0.0441231	0.0444092	0.116418	1.21922	0.000219246
AAEL000840	skeletal muscle/kidney enriched inositol 5-phosphatase		-0.109199	0.000799934	-0.0768596	-0.0187121	0.0860397	0.209501	0.314988	0.261179	0.255438	0.424187	0.298278
AAEL000841	hypothetical protein		0.0647593	0.156865	-0.366178	0.173675	-0.0247252	-0.0535428	-0.161223	-0.303346	-0.0693955	0.539853	0.643364
AAEL000844	ad-003	H13	-0.108225	-0.775605	-0.534872	-0.248273	-0.05444	0.249323	0.167475	0.05444	0.22939	1.02493	0.000140596
AAEL000845	protein-tyrosine phosphatase		0	0.766332	-0.0320573	-0.16115	-0.185974	-0.0208032	0.143197	0.380857	0.562166	0.952306	7.39e-06
AAEL000847	conserved hypothetical protein		0.0555534	0.0951303	-0.0701052	-0.0702177	-0.0555534	-0.0654705	0.0681112	0.110097	0.0864143	0.180315	0.995629
AAEL000848	poly(a) polymerase		0	-0.693008	-0.379555	-0.0205287	0.217267	0.165018	-0.0745213	-0.0675773	-0.116096	0.910275	0.0144408
AAEL000850	tyrosine kinase receptor		0.0804011	0.498114	0.0139486	-0.343917	-0.10525	0.07116	0.137907	0.00711921	-0.0125016	0.842032	0.107838
AAEL000851	conserved hypothetical protein		0.275522	-0.522345	-0.357054	-0.283648	-0.212111	0.130865	0.11486	0.205336	0.157871	0.797867	0.0515239
AAEL000852	peptidyl-prolyl cis/trans isomerase, putative		-0.14676	0.228152	-0.0469444	-0.0850403	0.197321	0.108436	0.0825999	-0.00332757	-0.0167614	0.374912	0.967859
AAEL000853	skinny hedgehog/sightless/rasp		-0.0360664	-0.441872	0.344657	0.324432	0.376993	0.0360664	0.0835961	-0.042686	0.363123	0.818865	0.325364
AAEL000854	fumarylacetoacetate hydrolase		-0.315124	0.229818	-0.256899	-0.142205	-0.210307	0.0259744	-0.0315905	-0.0124623	0.162243	0.544941	0.21761
AAEL000855	mannosyltransferase 1,		0.513464	-0.468256	0.222805	-0.0154525	0.00285428	0.214333	-0.166448	-0.0701824	-0.00285428	0.98172	0.313521
AAEL000856	germ cell-less protein		0.0156679	0.501262	0.0882669	0.104805	0.189666	-0.1422	-0.147443	-0.279369	-0.411808	0.91307	8.77e-05
AAEL000857	conserved hypothetical protein		0	0.372123	0.115595	-0.0587204	0.101032	-0.203634	-0.171051	-0.270797	-0.251515	0.64292	0.0191872
AAEL000858	ral guanine nucleotide exchange factor,		0.0502583	0.0277673	-0.195891	0.137623	-0.023794	-0.12207	-0.0804654	-0.0994867	0.0273501	0.333514	0.950564
AAEL000859	hypothetical protein	H10	-0.150598	-0.175197	-1.10889	-0.971503	-0.339453	1.04887	1.245	1.85898	1.80985	2.96787	7.55e-17
AAEL000860	conserved hypothetical protein		0.00664524	-0.0754923	-0.123034	0.070856	-0.0442514	-0.0649194	0.151172	-0.135719	-0.00664524	0.286891	0.94532
AAEL000861	hypothetical protein		0.242263	-0.284098	-0.100907	-0.327211	-0.135726	0.188648	-0.0726749	0.407442	0.0876948	0.734653	0.466242
AAEL000863	SPASIC protein, putative	H6	-1.09678	-0.736349	0.159992	-0.00855418	-0.0697135	-0.165216	0.415454	0.560965	0.487146	1.65775	7.47e-06
AAEL000864	sex-determining region y protein, sry		-0.689897	0.028654	-0.154111	-0.45113	-0.247569	0.0273143	0.00354686	0.160317	0.840355	1.53025	0.210037
AAEL000865	hypothetical protein		-0.423058	-0.358152	0.271932	-0.0523003	0.327944	0.0174461	0.196144	-0.0388785	0.225574	0.751002	0.586061
AAEL000867	F-box protein		0.019171	-0.00393191	-0.109203	-0.125919	-0.0775898	0.00393191	-0.0428667	-0.10499	-0.0794668	0.14509	0.999695
AAEL000868	conserved hypothetical protein		0.00195147	-0.628878	0.846793	0.112268	-0.340329	0.151581	-0.298442	-0.246081	-0.604623	1.47567	0.0320654
AAEL000869	zinc finger protein		-0.397443	-0.169549	-0.0107286	-0.428566	0.111873	-0.122371	0.0265548	0.471292	-0.21936	0.899858	0.85371
AAEL000874	Apaf-1 Related Killer	H3	-0.24177	2.2645	-0.00606409	0.00606409	-0.0218171	-0.0818329	-0.0090315	0.377267	0.121539	2.50627	1.1e-48
AAEL000875	conserved hypothetical protein		-0.28828	-0.20863	-0.340173	-0.0806723	0.0356889	0.140199	0.233667	-0.0601878	0.141579	0.57384	0.128072
AAEL000878	cuticle protein, putative		0.624803	0.41849	-0.0116259	-0.670301	-0.757321	-0.505513	-0.329369	0.0959253	-0.144782	1.38212	0.0462795
AAEL000879	cuticle protein, putative		0.17417	0.0892357	0.061214	-0.0308267	-0.463646	-0.590672	-0.184074	0.186115	-0.352035	0.776787	0.345363
AAEL000880	hypothetical protein		-0.0125819	0.270864	0.323817	-0.117016	0.0125819	0.0226006	0.036456	0.0495129	-0.147523	0.47134	0.721256
AAEL000883	hypothetical protein		-0.167219	0.0934092	-0.115097	-0.0346462	0.0489219	0.0484786	0.105679	0.0346462	0.329105	0.496323	0.589565
AAEL000884	eukaryotic translation initiation factor 2 alpha kinase 1 (heme-regulated eukaryotic initiation factor eif-2-alpha kinase)		0	-0.285423	0.35214	0.689974	0.487661	0.429056	0.415107	0.236376	0.433407	0.975397	0.00914341
AAEL000885	cytoplasmic dynein heavy chain		0	0.0091573	0.0712448	0.486451	-0.186734	-0.251375	-0.23179	0.37748	-0.00704364	0.737826	0.894439
AAEL000886	hypothetical protein	H7	0.0114238	-0.645569	0.336712	-0.14301	-0.0193136	0.351586	-0.0114238	0.441452	0.309309	1.08702	0.00493763
AAEL000888	single stranded DNA binding protein		0.436054	0.224795	-0.144649	-0.233115	-0.212466	-0.120938	0.232783	0.0693249	-0.0579124	0.669169	0.14506
AAEL000893	sex-determining region y protein, sry		0	0.34938	-0.448277	-0.301098	-0.248687	0.00734797	-0.471789	0.177367	0.128309	0.821168	0.760922
AAEL000895	peroxisome biogenesis factor 1 (peroxin-1)		0.0222254	-0.526144	-0.292287	-0.00472255	-0.127081	-0.0392435	-0.0124286	-0.106028	0.126302	0.652446	0.067797
AAEL000897	conserved hypothetical protein	H3	0.434519	1.19873	-0.172849	-0.207592	-0.151214	-0.109577	-0.0518934	-0.35603	-0.524821	1.72355	3.29e-18
AAEL000898		H7	-0.244992	-0.810354	-0.125483	-0.217263	0.125483	0.351314	0.551261	0.79082	1.12321	1.93357	5.99e-10
AAEL000899	glycosyltransferase		-0.299527	0.0145926	-0.105577	0.037098	0.0773804	0.129497	0.126951	0.0945754	0.135716	0.435242	0.967165
AAEL000900	conserved hypothetical protein		-0.410964	0.81667	-0.0206718	-0.161138	0.29949	-0.255107	0.49587	0.337199	0.790489	1.22763	0.102446
AAEL000902	sugar transporter	H7	0.0866695	-1.6137	0.409974	0.0138043	-0.192987	-0.168154	-0.163666	0.0248656	0.368342	2.02367	9.9e-16
AAEL000903	Enhancer of yellow 2 transcription factor		-0.302497	-0.283566	-0.0509501	-0.0856028	0.159792	0.525956	0.111675	0.348938	-0.0685011	0.828453	0.0227137
AAEL000904			-0.0224186	-0.0139386	0.0619729	-0.606955	-0.403341	0.0610193	0.0139386	0.483825	0.468166	1.09078	0.0273654
AAEL000905		H3	-0.344539	0.0624596	-0.259976	-0.10624	-0.0434041	0.258467	-0.0131448	0.560986	0.664058	1.0086	0.00452341
AAEL000906	guanyl-nucleotide exchange factor		-0.0190126	0.23431	-0.113899	-0.0237995	-0.150059	0.0562957	0.229131	0.0544803	-0.105287	0.384369	0.621051
AAEL000907	hypothetical protein	H12	0.117432	0.128351	1.09843	-0.764704	-0.451462	0.169696	-0.893983	-0.179516	-0.642902	1.99241	0.00395892
AAEL000909	histone H1, putative		1.0629	0.0524482	0.24357	-0.166888	-0.0524482	0.322015	0.23991	0.422381	-0.171277	1.23417	0.554015
AAEL000910	conserved hypothetical protein		-0.952456	0.143738	-0.186662	-0.180741	-0.197147	-0.0405271	-0.204968	0.034973	-0.088251	1.09619	0.471761
AAEL000912	conserved hypothetical protein		0.0219116	-0.923161	-0.0171761	0.131338	0.0171761	0.563694	-0.296489	0.108329	-0.545731	1.48685	0.471004
AAEL000915	hypothetical protein	H12	0.644711	0.55637	0.702758	-0.305633	-0.917239	-0.111616	-0.713489	0.0157263	-1.20376	1.90652	0.00132435
AAEL000918			-0.843849	0.211746	0.462226	0.0199525	0.00071047	-0.00071047	0.314008	0.206312	0.284416	1.30608	0.0533718
AAEL000920	hypothetical protein	H7	0	-1.2408	0.559094	0.319834	-0.435981	-0.231964	-0.191521	0.0341088	0.160952	1.79989	1.58e-07
AAEL000922	polyribonucleotide nucleotidyltransferase		-0.0687574	-0.0641637	-0.238383	-0.00726005	0.105869	0.130742	0.106059	-0.0874936	-0.209302	0.369125	0.63498
AAEL000924	eukaryotic translation initiation factor 2-alpha kinase		-0.0254725	-0.375303	-0.162661	0.217518	0.0896917	0.133557	-0.0280898	-0.0810451	-0.183333	0.592821	0.12237
AAEL000925	leucine-zipper-like transcriptional regulator 1 (LZTR-1)		0.126608	-0.0441114	-0.0657271	-0.0257243	-0.0068184	0.0216683	-0.0250374	0.11221	0.172923	0.23865	0.989067
AAEL000926	pickpocket		0.875344	-1.09486	0.519363	-0.0550459	-0.108377	0.318605	-0.491018	-0.275792	-0.476272	1.9702	0.302883
AAEL000927	hypothetical protein		-0.100796	0.40481	-0.151937	0.143146	-0.0796306	0.0164908	0.134763	-0.330813	-0.0164908	0.735623	0.504314
AAEL000930	conserved hypothetical protein		-0.141519	0.405396	0.000418079	-0.155468	0.0560854	-0.000418079	0.0598269	0.178675	0.358452	0.560864	0.0478302
AAEL000931	alkaline phosphatase		-0.0924318	0.0409115	0.118219	0.115483	-0.414434	-0.18557	-0.312675	-0.18543	-0.17434	0.532653	0.23107
AAEL000933	conserved hypothetical protein	H4	-0.300909	1.51973	0.5648	-0.000883197	0.00529844	-0.281264	-0.0215837	0.0154473	-0.0198407	1.82064	7.02e-29
AAEL000934	clathrin light chain		-0.0757116	0.37064	0.00414247	-0.0937385	0.0533026	-0.056568	-0.00213292	0.051532	0.311062	0.464379	0.233783
AAEL000936	hypothetical protein		0.0153162	-0.426004	-0.621045	-0.298678	-0.237817	0.185211	0.128067	-0.0153162	-0.238617	0.806256	0.23954
AAEL000938	conserved hypothetical protein		0.212965	-0.750903	-0.0630356	0.167884	-0.069221	-0.0179557	0.0752647	0.0179557	-0.020237	0.963868	0.16459
AAEL000939	conserved hypothetical protein		0.00188036	-0.128713	-0.0999083	0.156554	0.176861	0.0987035	-0.00188036	-0.0687447	-0.117891	0.305574	0.944823
AAEL000940	conserved hypothetical protein		0.0881668	0.149011	0.0461581	-0.341477	-0.449238	-0.0616341	-0.357456	0.110838	0.0336501	0.598249	0.570868
AAEL000941	mitochondrial inner membrane protein translocase, 8kD-subunit, putative		0.00651019	-0.301471	-0.0928454	0.0311527	0.201916	0.396346	0.224411	0.175287	-0.000441541	0.697818	0.0880637
AAEL000942	conserved hypothetical protein		0.0501084	-0.0544454	0.172385	0.263381	0.375832	0.363771	-0.160708	-0.114128	-0.131988	0.536539	0.682011
AAEL000943	conserved hypothetical protein		0.679106	0.421059	-0.188391	-0.375545	0.0019655	-0.0600214	-0.129588	0.2008	-0.0172605	1.05465	0.306375
AAEL000944	conserved hypothetical protein		0.0570524	0.562759	-0.277402	-0.210906	-0.157541	-0.0405243	0.193552	0.0603793	0.223084	0.840161	8.75e-05
AAEL000946	conserved hypothetical protein		0.799607	0.104493	-0.504781	-0.19524	-0.551081	-0.30771	0.330132	0.0162078	-0.124465	1.35069	0.679707
AAEL000947	microsomal signal peptidase 23 kd subunit (spc22/23)		0.0455067	0.876002	-0.00745122	-0.0248477	0.00745122	0.110636	0.0955232	0.103292	0.289467	0.90085	1.47e-05
AAEL000948	conserved hypothetical protein	H8	-0.318469	-0.183727	-0.315827	-0.54638	-0.0611468	1.1121	1.05974	1.76389	1.73327	2.31027	1.15e-27
AAEL000949	conserved hypothetical protein		-0.0599195	-0.0782867	-0.109334	0.0772252	-0.0901659	-0.0483028	0.101197	0.00710348	0.0626049	0.210532	0.989659
AAEL000950	conserved hypothetical protein		0.185641	-0.488553	-0.587245	-0.0339572	0.093863	0.0339572	-0.108623	-0.365696	-0.347295	0.772886	0.00114349
AAEL000951	elongation factor 1-beta2	H14	0.401292	-0.271269	-0.613171	-0.1727	-0.178265	0.199315	0.030034	0.182728	0.0830027	1.01446	0.00602288
AAEL000952	conserved hypothetical protein	H13	0.659351	-0.867694	-0.105904	0.224559	0.121469	0.120548	0.0527242	-0.061815	-0.124143	1.52705	5.52e-06
AAEL000953	conserved hypothetical protein		-0.745144	0.0550773	0.279183	-0.315326	-0.0733296	-0.153337	0.174152	0.127275	0.311656	1.0568	0.0342272
AAEL000954	conserved hypothetical protein		0.163255	0.498561	-0.461957	-0.862854	-0.376304	-0.00227104	-0.919902	-0.498793	0.586239	1.50614	0.100872
AAEL000955	conserved hypothetical protein		-0.20081	0.309639	-0.268299	-0.0831007	-0.20355	0.0124511	0.0434674	-0.218573	0.161926	0.577938	0.0780356
AAEL000956	conserved hypothetical protein	H4	-0.236995	0.944247	0.343379	-0.118461	-0.463807	0.0505845	-0.0981931	0.212066	-0.129149	1.40805	1.36e-08
AAEL000957	hypothetical protein	H9	-0.773083	-0.232035	-0.878101	-0.797051	-0.401009	0.28225	0.30898	0.738081	1.23351	2.11161	1.39e-12
AAEL000958	conserved hypothetical protein		0.0599319	0.193892	0.310701	0.097724	0.0449531	-0.097743	-0.419318	-0.308827	-0.556084	0.866785	0.00111298
AAEL000962	conserved hypothetical protein		-1.24397	-0.268659	0.0315369	0.0414994	-0.0315369	-0.998642	0.0488288	-0.269452	-0.494344	1.2928	0.525325
AAEL000963	conserved hypothetical protein		0.152204	0.096407	0.178811	-0.00072431	-0.246835	0.0160645	-0.039333	-0.0544223	-0.20516	0.425646	0.662123
AAEL000964	regulatory factor X-associated ankyrin-containing protein, putative		-0.688798	0.0292909	-0.0394071	0.0136682	0.105254	0.174907	-0.0344796	0.253238	0.0279752	0.942036	0.480562
AAEL000965	conserved hypothetical protein		-0.0765348	-0.386272	-0.117133	0.129037	0.098959	0.025023	-0.0751741	-0.0166602	0.0352555	0.515309	0.330107
AAEL000967	tmc7 protein	H13	0.26012	-0.872228	-0.0942367	0.0850569	-0.173278	0.0064178	-0.0674478	0.179976	0.129118	1.13235	2.01e-05
AAEL000970	predicted protein		-0.54707	-0.118562	-0.305027	0.0291519	-0.20855	0.1183	0.251162	0.166161	0.0924434	0.798232	0.284979
AAEL000971	smile protein		0.427678	0.0490658	-0.150001	0.117916	-0.242922	-0.0156477	0.258323	0.0395945	-0.181792	0.6706	0.96627
AAEL000973	conserved hypothetical protein		0.0493544	-0.2711	0.161054	-0.0962013	0.335226	0.182951	0.349582	0.445632	0.683639	0.954739	0.0343823
AAEL000974	zinc finger protein		-0.70682	-0.292858	0.204507	0.576127	-0.296494	0.493017	0.920166	-0.783711	0.259204	1.70388	0.134739
AAEL000977	hypothetical protein	H5	0.318669	0.752289	0.674537	0.442477	-0.184519	-0.082441	0.0562964	-0.311421	-0.40808	1.16037	2.07e-07
AAEL000978	conserved hypothetical protein	H13	0.168437	-1.18063	-0.699869	0.1545	-0.0158964	0.0158964	-0.0810975	-0.439528	-0.140492	1.34907	1.08e-05
AAEL000980	hypothetical protein		-0.707547	0.176343	0.0620074	0.248048	0.234712	0.578949	0.0983545	0.00214132	-0.00214132	1.2865	0.83177
AAEL000981	hypothetical protein		-0.117474	-0.190115	-0.0421921	-0.0319197	-0.0783671	0.0629918	0.0129722	0.212395	0.0763101	0.40251	0.809038
AAEL000982	Mediator of RNA polymerase II transcription subunit 7 (Mediator complex subunit 7)		0.110533	-0.14849	-0.134133	-0.11506	0.000644172	0.0182998	0.189831	0.239548	0.21551	0.388038	0.743737
AAEL000983	clathrin coat assembly protein ap19		-0.0616613	0.0395387	-0.394541	-0.245349	0.0939197	0.034264	-0.0386016	0.0710159	-0.0242684	0.48846	0.399001
AAEL000984	conserved hypothetical protein	H11	0	-0.603146	-0.349134	0.0137291	0.201026	-0.115304	0.154161	0.00372596	0.857409	1.46056	6.41e-11
AAEL000985	conserved hypothetical protein		-0.187838	0.481451	0.0248067	-0.221771	-0.0248067	-0.0910287	0.0455113	-0.178439	0.27811	0.703223	0.00486155
AAEL000986	NADH-ubiquinone oxidoreductase ashi subunit	H2	0.831908	0.737044	0.445361	-0.0228873	-0.10774	-0.283868	-0.621224	-0.714777	-1.02666	1.85857	1.72e-23
AAEL000987	60S ribosomal protein L8	H14	0.536074	-0.326879	-0.765969	-0.404056	-0.127394	0.349261	0.147874	0.296099	0.120521	1.30204	0.000357564
AAEL000988	conserved hypothetical protein	H13	0.0682345	-1.28396	-0.412889	-0.0112527	-0.0290635	-0.0601306	-0.0592237	-0.0215086	0.0112527	1.35219	9.57e-09
AAEL000989	hypothetical protein	H12	0.700327	1.07959	1.321	0.834885	0.142102	-0.0756506	-0.359512	0.00506691	-0.924812	2.24581	7.98e-06
AAEL000990	conserved hypothetical protein		-0.59212	-0.212653	0.0257612	0.10515	-0.0939103	0.0996151	0.0880932	-0.0982958	-0.0702046	0.69727	0.802802
AAEL000992	hypothetical protein		-0.0333122	0.0600394	0.267524	0.050877	0.0126767	-0.0126767	-0.135403	-0.141478	-0.160713	0.428237	0.837232
AAEL000993	dally		0.0103256	-0.134483	0.0610077	-0.0121845	-0.154399	-0.0103256	0.0443066	0.161475	-0.0420967	0.315875	0.982372
AAEL000994	conserved hypothetical protein		0.364479	0.0703268	0.394897	0.0175982	-0.0884127	-0.109081	0.0162946	0.0857595	-0.0289373	0.503978	0.253623
AAEL000996	conserved hypothetical protein		-0.0235158	0.0235158	-0.268835	-0.146394	0.0633467	0.178091	0.0751688	-0.115993	-0.0907865	0.446927	0.562951
AAEL001000	1-acyl-sn-glycerol-3-phosphate acyltransferase		0.150543	0.235699	0.0114309	-0.0158518	0.116522	-0.0485501	-0.211189	-0.125243	-0.224592	0.460291	0.880097
AAEL001001	hypothetical protein		-0.270405	-0.0118709	0.111438	-0.113396	0.111651	0.0356626	0.0118709	-0.0538267	-0.206788	0.382056	0.994059
AAEL001002	sodium/solute symporter		-0.0463949	-0.155363	0.405539	-0.0251084	0.0749972	0.111901	0.00529776	-0.0789627	-0.0696837	0.560902	0.411182
AAEL001004	conserved hypothetical protein		-0.0382964	-0.319608	0.185437	0.060502	0.122699	0.0338106	0.000278971	0.139	-0.000278971	0.505045	0.573306
AAEL001005	calreticulin		-0.199582	0.64575	-0.153423	-0.141573	-0.0341417	0.0418846	0.190446	-0.187356	0.484321	0.845332	0.000841602
AAEL001006	conserved hypothetical protein		-0.0228205	0.0228205	0.0299468	0.0731894	0.211092	-0.10086	0.155598	-0.152923	-0.317391	0.528484	0.76389
AAEL001007	conserved hypothetical protein		0.176886	-0.183021	0.00638413	-0.118291	-0.0693466	-0.00638413	-0.0282457	-0.0623124	-0.12344	0.359908	0.961709
AAEL001008	conserved hypothetical protein		-0.00485472	0.51719	-0.0426676	0.0721706	-0.0939516	0.304976	0.214976	0.135151	0.192938	0.611141	0.517447
AAEL001009	dab2-interacting protein		-0.19491	-0.289639	-0.306687	0.167194	-0.323137	-0.184877	0.243642	0.166712	0.459974	0.783111	0.437469
AAEL001011	conserved hypothetical protein		-0.344464	-0.0876883	-0.246415	-0.114606	0.502129	0.328281	0.331062	0.189627	0.294078	0.846594	0.0394268
AAEL001013	conserved hypothetical protein		-0.159804	-0.177563	0.0826733	-0.0810475	0.084092	0.0828593	0.0948208	0.140242	0.397844	0.575407	0.5092
AAEL001014	vacuolar protein sorting-associated		0.129826	0.173621	0.110396	-0.179108	-0.0105446	-0.16862	0.0105446	0.263238	0.175669	0.442346	0.66563
AAEL001016	zinc finger protein		-0.663793	-0.466018	0.0281769	0.0456511	0.0043303	-0.00235594	0.0434106	-0.240136	0.0113572	0.709444	0.553878
AAEL001017	tyrosine-protein kinase		-0.0525362	0.312075	0.15227	0.0272814	0.0311573	-0.118914	0.320351	0.0115796	0.159468	0.439265	0.849063
AAEL001018	conserved hypothetical protein		-0.283237	-0.71678	0.145534	-0.163058	0.369415	-0.374189	0.0757207	-0.0232151	0.0342997	1.0862	0.919236
AAEL001019	translation elongation factor	H7	-0.391339	-1.33695	-0.103928	0.222131	0.0262171	0.57775	0.545983	0.244954	0.250097	1.9147	1.23e-13
AAEL001020	anterior fat body protein	H6	0.00578113	-0.153938	0.821407	0.345342	0.00186164	-0.0250992	-0.101421	-0.071837	-0.320353	1.14176	3.23e-09
AAEL001022	anterior fat body protein	H6	0.382307	0.50662	1.20284	0.385339	-0.11163	-0.21791	-0.361158	-0.423859	-0.564689	1.76753	7.3e-26
AAEL001024	mitochondrial carrier protein		0.0104056	0.329711	0.0881895	-0.179335	-0.117461	-0.256068	-0.083252	-0.0991885	-0.105721	0.585778	0.255539
AAEL001029	conserved hypothetical protein		0.348503	-0.598735	0.0321121	-0.132268	0.0567086	0.202542	0.100397	0.177477	0.0925636	0.947239	0.1514
AAEL001030	S-formylglutathione hydrolase, putative		-0.552158	-0.135959	0.27636	0.289385	0.105238	0.197	0.290051	-0.00871433	0.28957	0.842209	0.0274516
AAEL001031	conserved hypothetical protein	H7	-0.276469	-1.73377	-0.0296414	0.217394	-0.0486217	0.210905	0.0296414	-0.0361515	-0.0306002	1.95116	2.7e-13
AAEL001032	conserved hypothetical protein		0.056377	-0.455829	-0.322569	-0.00866982	0.1431	0.18877	0.362393	0.312458	0.462345	0.918173	5.1e-05
AAEL001033	methyl-cpg binding protein, mbd		-0.066149	-0.335889	-0.0502888	-0.140722	0.0361101	0.178787	0.131219	0.354671	0.140073	0.69056	0.458774
AAEL001034	adenylate cyclase type vi		-0.884975	-0.469548	0.235091	0.245233	0.223827	0.235771	0.0550854	-0.175166	-0.0298186	1.13021	0.793309
AAEL001036	ikappab kinase complex-associated protein		-0.00225893	-0.856803	-0.385599	0.0879187	0.0510069	0.0789863	-0.0523061	-0.184255	-0.0115268	0.944722	0.000192695
AAEL001037	ribosomal RNA methyltransferase	H13	0.111938	-1.93905	-0.930099	0.00324119	-0.0571946	-0.00324119	-0.123132	-0.350013	-0.0184569	2.05099	5.34e-16
AAEL001038	cak1		0.125455	-0.526029	-0.00737511	-0.0157874	-0.0239131	0.223403	0.0324688	0.146285	0.225044	0.751073	0.452553
AAEL001039	metaxin		0.340503	-0.111644	0.357795	0.233136	0.0876882	0.146229	0.00313712	0.0410616	-0.290732	0.648527	0.333723
AAEL001041	guanine nucleotide-binding protein beta 3 (g protein beta3)		0.0497174	-0.107605	0.109199	0.115328	-0.117545	-0.0232417	0.041778	-0.0417103	0.112154	0.232873	0.932609
AAEL001043	hypothetical protein		-0.0271453	-0.104224	0.0271453	0.141886	0.637513	0.507068	0.501118	-0.581043	-0.237375	1.21856	0.42151
AAEL001044	tyrosyl-tRNA synthetase		0.0686401	-0.199725	-0.494448	-0.00101329	-0.0310545	0.148589	0.0352478	-0.111559	-0.069388	0.643037	0.105631
AAEL001045	hypothetical protein		0.303336	1.1504	-0.202185	0.0250834	-0.00462339	-0.404797	-0.0096425	-0.134774	0.00462339	1.55519	0.307743
AAEL001046	phosphatase fragment		0.131476	0.102871	0.0211404	-0.0460966	-0.137367	-0.118262	0.0322483	-0.0120378	-0.077915	0.268843	0.995133
AAEL001047	adenylate cyclase	H7	0.785189	-0.358568	0.894555	0.664942	0.229475	0.0217888	-0.0707661	-0.113713	-0.139433	1.25312	1.48e-14
AAEL001048	short-chain dehydrogenase		-0.275187	-0.218163	0.10811	-0.00898369	-0.139416	0.29261	0.271699	0.532086	0.669721	0.944908	0.000130648
AAEL001050	conserved hypothetical protein		-0.471528	-0.308054	-0.180246	-0.313439	-0.0258685	0.0407067	0.0200032	0.224507	0.235178	0.706706	0.0352126
AAEL001052	heat shock protein, putative	H7	0.640781	-0.883779	0.471141	0.00441046	-0.0345736	0.0459445	-0.0755744	0.0758425	0.107611	1.52456	3.66e-09
AAEL001054	glutathionetransferase	H8	-0.576956	-0.305096	-0.291686	-0.481042	0.210312	0.754632	0.666452	2.01627	1.99349	2.59323	1.65e-06
AAEL001056	hypothetical protein		-0.101919	0.293946	0.115941	-0.138778	-0.158574	-0.154288	-0.139079	-0.179339	-0.250662	0.544609	0.222121
AAEL001058	jun activation domain binding protein		-0.733514	1.24724	-0.225481	0.000694746	0.432919	-0.000694746	0.68306	-0.113909	-0.746031	1.99327	0.0112947
AAEL001060	conserved hypothetical protein		0.214435	-0.641021	-0.0987765	-0.0625682	-0.0937663	0.0161615	-0.391793	0.00880941	0.336425	0.977447	0.545727
AAEL001061	glutathionetransferase		-0.0258635	0.149338	0.391701	-0.339184	-0.225431	-0.00603902	0.0476481	0.548396	0.625174	0.964358	0.00152698
AAEL001062	hypothetical protein	H10	-0.151145	0.129626	-0.31082	-0.321569	-0.116776	0.442241	0.668841	0.95677	1.19088	1.51245	0.000143314
AAEL001065	conserved hypothetical protein		0.166038	0.633778	0.212012	-0.301602	0.124495	-0.00265097	-0.18703	0.151483	0.00265097	0.93538	0.145776
AAEL001066	mitochondrial ribosomal protein, L22, putative		0.234915	0.217032	0.0699396	-0.943798	-0.346051	0.0916473	-0.268903	-0.136805	-0.934018	1.17871	0.0139331
AAEL001068	myosin light chain 2V, putative	H14	1.04017	0.239977	0.126292	0.237232	-0.126292	-0.130288	-0.222144	-0.591671	-0.708526	1.7487	1.77e-09
AAEL001069	histone deacetylase		-0.276803	-0.098925	0.122157	-0.131865	0.0290695	-0.0249684	0.163637	0.211529	0.0116575	0.488332	0.617725
AAEL001071	glutathionetransferase		-0.0482274	0.0482274	-0.25475	0.352239	-0.125107	-0.232076	0.224658	0.428936	0.936631	1.19138	0.40461
AAEL001075	conserved hypothetical protein	H14	1.21958	0.403486	0.125927	-0.327845	-0.467264	-0.125927	-0.497367	-0.75624	-0.495751	1.97582	3.14e-06
AAEL001077	Clip-domain serine protease, family B. Protease homologue.	H3	-0.65891	0.440738	-0.267115	-0.148414	-0.33675	-0.0422446	0.103883	0.0422446	0.0835823	1.09965	5.33e-05
AAEL001078	glutathionetransferase		0.536506	0.129701	-0.426196	0.0380833	-0.167686	-0.65892	-0.925778	-0.428104	0.0772169	1.46228	0.438232
AAEL001079	fgf receptor activating protein		0.682434	-0.0461676	-0.185905	-0.0972198	0.00741469	-0.077324	0.0187788	-0.00873926	-0.00741469	0.868339	0.931465
AAEL001080	RNA 3' terminal phosphate cyclase	H13	0.285721	-1.31058	-0.341414	0.0120012	-0.248393	0.0957334	-0.0812338	-0.138577	-0.0120012	1.5963	1.52e-07
AAEL001082	conserved hypothetical protein	H2	1.1004	0.789682	0.354843	0.104802	0.264724	-0.300141	-0.378625	-0.549417	-0.679061	1.77946	1.87e-11
AAEL001084	Clip-domain serine protease, family B. Protease homologue.	H11	0	-0.389153	-0.524649	-0.50922	-0.418696	0.0967092	0.70777	0.636282	0.819688	1.34434	3.42e-10
AAEL001085	conserved hypothetical protein		0.128198	0.504983	0.0410937	0.100162	0.00297683	0.138275	0.0378483	-0.167798	-0.268135	0.773118	0.140203
AAEL001086	hypothetical protein		-0.189381	-0.0444062	-0.118842	0.241655	-0.0112183	-0.0127228	0.0112183	0.121522	0.0282749	0.431036	0.995087
AAEL001087	synaptic vesicle protein	H6	0.324778	0.442231	0.953807	0.352866	-0.211642	-0.261334	-0.311219	-0.128308	-0.321463	1.27527	1.26e-13
AAEL001088	beta-1,3-galactosyltransferase		0.190761	-0.182092	0.165163	0.0296702	0.132464	-0.0285474	-0.146897	-0.0387048	-0.147469	0.372852	0.613292
AAEL001089	conserved hypothetical protein		0.394441	0.445255	0.239073	-0.00254682	0.0831226	0.128452	-0.00896064	-0.0423543	-0.0720273	0.517282	0.769279
AAEL001090	glutathionetransferase		0.256455	-1.25188	-0.359098	-0.279683	-0.604597	-0.00661393	-0.156444	0.126097	0.36774	1.61962	0.406162
AAEL001091	malic enzyme	H2	0.869952	1.83205	1.30092	0.373969	-0.0856812	-0.224773	-0.40438	-0.38534	-0.684984	2.51703	6.67e-39
AAEL001092	udp-glucose pyrophosphatase		0.153557	-0.0578938	0.317567	-0.287538	-0.270004	0.0834695	-0.0193629	-0.0193927	-0.185711	0.605105	0.030244
AAEL001093	PHD finger protein		0.177957	0.20107	0.0204993	-0.2292	-0.617729	0.0588243	-0.27416	-0.0204993	-0.209133	0.818799	0.919236
AAEL001094	conserved hypothetical protein		0.160248	0.311317	0.193563	0.14615	0.15576	-0.00988956	-0.00816283	-0.060318	0.233471	0.371635	0.665087
AAEL001095	hypothetical protein		0.22963	-0.243267	0.0374195	-0.270209	-0.0545958	-0.139944	-0.10332	0.000732365	0.0605748	0.499839	0.550591
AAEL001097	hypoxia-inducible factor		-0.129743	-0.392209	0.10177	0.153769	-0.0875387	-0.496384	0.0308322	-0.255671	0.0951722	0.650153	0.437469
AAEL001098	clip-domain serine protease, putative	H9	-0.851555	0.603848	-0.259096	-0.239858	-0.447574	-0.00452436	0.516576	0.319265	0.428232	1.4554	1.51e-11
AAEL001099	DEAD box polypeptide		-0.0382669	0.10552	-0.203518	0.00494187	-0.0899013	0.113808	0.194401	-0.00494187	0.16917	0.397919	0.728814
AAEL001100	phosphoserine phosphatase	H4	0.567845	3.75749	1.49992	0.00257347	0.268488	-0.307306	-0.246099	-0.39426	-0.0992905	4.15175	4.36e-224
AAEL001101	ATP-dependent transporter		-0.233543	0.00528949	-0.135776	0.213792	0.0243493	0.177706	0.196647	-0.0586898	0.12428	0.447335	0.585243
AAEL001102	adenosine kinase		0.58426	-0.256749	-0.0299641	-0.206984	-0.0934561	0.0329798	-0.0421024	0.0851031	0.127339	0.84101	0.0456314
AAEL001103	prefoldin, subunit, putative		0	0.0699863	-0.0422543	0.0308499	0.178848	-0.0601876	0.146599	0.0190093	-0.0133465	0.239036	0.996809
AAEL001104	conserved hypothetical protein	H9	-0.478225	0.159538	-0.203766	-0.235739	-0.0634474	0.0590509	0.196106	0.304986	0.805013	1.28324	4.82e-06
AAEL001105	von Hippel-Lindau disease tumor suppressor, putative		-0.0738092	0.393905	0.0606543	-0.164634	0.0855851	0.1491	-0.0606543	0.133153	0.0843545	0.558539	0.670108
AAEL001106	conserved hypothetical protein		0.309114	0.288706	0.0802238	-0.163934	0.430056	-0.21232	-0.639894	0.322001	0.26622	1.06995	0.645626
AAEL001107	hypothetical protein	H10	0.544425	0.473188	-0.171637	-0.0713376	-0.291901	-0.250807	-0.538704	0.0703863	0.0531054	1.08313	7.23e-07
AAEL001108	protein kinase c		0.162496	-0.499704	-0.26257	0.170567	-0.00694728	-0.458661	0.00694728	-0.127878	-0.113129	0.670271	0.575249
AAEL001109	glutaredoxin		-0.00631721	0.369225	0.719781	0.217247	0.044971	0.193025	-0.127146	0.231821	-0.225887	0.945668	0.00109245
AAEL001110	jnk stimulatory phosphatase (jsp1)		0.235948	0.190235	-0.25493	-0.22709	0.0291988	-0.164881	-0.108952	-0.0291988	-0.356132	0.59208	0.872788
AAEL001111	zinc finger protein		-0.4938	0.240941	0.0256193	0.0732583	0.241674	0.0365074	-5.68681e-05	-0.0774716	0.310127	0.803926	0.73526
AAEL001112	conserved hypothetical protein		-0.0125123	0.197569	-0.0137253	-0.00177347	-0.0569949	0.0212744	0.092663	0.00967508	0.0562971	0.254564	0.984294
AAEL001113	inorganic phosphate cotransporter, putative		0.544189	0.517943	-0.138033	-0.337153	-0.328554	-0.262074	-0.176657	0.106548	0.0329563	0.881342	0.000472636
AAEL001114	amino acid transporter		-0.328046	0.0491451	-0.129371	-0.0162262	-0.0130313	0.063457	0.00462538	-0.0948106	0.113184	0.44123	0.872141
AAEL001116	hypothetical protein		-0.244377	0.623967	0.00798134	0.00546022	-0.203925	0.0155553	-0.00546022	-0.179911	0.186725	0.868344	0.584295
AAEL001117	conserved hypothetical protein		-0.151789	0.0124513	0.435255	0.275092	0.17779	-0.29235	-0.329906	-0.411264	-0.636642	1.0719	0.731014
AAEL001119	DNA-binding protein Ewg, putative		-0.0890328	-0.341915	-0.258348	0.0449126	-0.177872	-0.0815003	-0.00924121	0.142794	-0.184406	0.484709	0.566884
AAEL001120	conserved hypothetical protein		0.196167	-0.557246	0.0579989	0.658465	0.00342982	-0.117223	0.55083	-0.0697418	-0.285978	1.21571	0.382023
AAEL001121	n-acetylgalactosaminyltransferase		-0.034372	-0.460305	-0.00944597	-0.0171215	-0.171695	0.118045	-0.0305981	0.00568902	0.108035	0.57835	0.403295
AAEL001122	n-acetylgalactosaminyltransferase	H10	-0.116305	0.0689632	-0.613852	-0.377946	-0.0689632	0.184479	0.141841	0.638108	0.957746	1.5716	0.00126815
AAEL001124	conserved hypothetical protein		0.2083	-0.598535	0.0030602	-0.101761	0.124487	-0.0516502	-0.0030602	0.0414248	0.0248088	0.806835	0.263656
AAEL001126	rest corepressor (corest) protein		0.0745933	0.120496	-0.00776715	-0.0589203	0.0326067	-0.0374983	-0.0966561	0.0582267	0.0852765	0.217152	0.991253
AAEL001127	defective proboscis extension response, putative		0.0508044	-0.227248	0.184304	-0.0244983	-0.331105	-0.103025	-0.0324611	0.0244983	-0.578667	0.762971	0.767038
AAEL001128	AMP dependent coa ligase	H6	-0.219354	-2.17595	2.36814	0.792639	-0.0178058	-0.0807544	-0.0912623	0.0178058	-0.126859	4.54409	2.58e-113
AAEL001129	conserved hypothetical protein		-0.0596841	-0.222082	0.0253631	0.061869	0.166676	-0.0901132	-0.0167282	-0.0511791	-0.170402	0.388758	0.758316
AAEL001131	splicing factor, putative		0.0732428	0.465955	-0.310437	0.122915	-0.0465927	0.113252	-0.184826	-0.264211	-0.383444	0.849399	0.285079
AAEL001132	conserved hypothetical protein		-0.491575	0.159239	0.0138502	0.0898686	0.105654	0.225536	0.233097	0.0405226	0.157084	0.724672	0.258624
AAEL001133	conserved hypothetical protein		0.0719931	-0.250701	-0.0829302	0.155073	0.0807895	0.215899	0.0672599	0.0456028	-0.0456028	0.4666	0.526036
AAEL001134	Probable methylmalonate-semialdehyde dehydrogenase [acylating], mitochondrial Precursor (Malonate-semialdehyde dehydrogenase [acylating])(MMSDH)(EC 1.2.1.27)(EC 1.2.1.18)		0.779645	0.353645	-0.0775649	0.00228674	-0.17016	-0.00228674	-0.0952921	0.137813	-0.210663	0.990309	0.00939776
AAEL001135	hypothetical protein		-0.366077	-0.599751	-0.420901	0.24624	0.0438105	0.133148	0.126982	-0.375652	-0.012553	0.84599	0.731665
AAEL001136	hypothetical protein		-0.0162934	-0.362916	0.0162934	0.31634	0.177944	0.123366	0.123563	-0.0170285	0.349317	0.712233	0.51175
AAEL001138	hypothetical protein		0	0.11469	0.0700531	-0.123789	0.0134355	0.284467	0.0249949	-0.0446581	0.314693	0.438482	0.999143
AAEL001139	br serine/threonine-protein kinase		0.152261	-0.870916	-0.0177648	0.0167209	-0.183325	0.0070047	-0.215698	0.092851	-0.172755	1.02318	0.347047
AAEL001141	transcriptional regulator ATRX (X-linked helicase II)		-0.253801	-0.241082	-0.307281	0.104252	0.0491932	-0.0350212	0.0617874	-0.000263017	0.000263017	0.411533	0.495717
AAEL001142	rab gdp/GTP exchange factor		-0.0438296	-0.0332086	0.0435873	-0.256122	-0.0371881	-0.059068	0.0348853	0.253537	0.153734	0.50966	0.737934
AAEL001143	conserved hypothetical protein		0.210164	-0.431932	-0.0822032	-0.226579	-0.0451607	-0.131041	-0.0491513	0.0202857	0.116966	0.642097	0.654777
AAEL001144	conserved hypothetical protein		-0.165149	0.326448	0.0273875	-0.161885	0.0279828	-0.102371	-0.0843661	0.155252	0.347696	0.512845	0.0702411
AAEL001145	dual specificity protein phosphatase 7, putative	H3	0.218693	0.847097	-0.301793	-0.0731317	0.0555322	-0.166247	-0.0813405	0.0415289	0.275497	1.14889	6.77e-08
AAEL001146	n-acetylgalactosaminyltransferase		-0.34301	0.0605503	-0.108309	-0.246145	-0.459326	-0.140474	0.0942936	0.0498851	0.024169	0.55362	0.931136
AAEL001147	hypothetical protein		-0.196052	-0.456188	-0.263906	0.0690075	-0.0454286	0.0262889	0.128317	0.058582	-0.0262889	0.584506	0.324523
AAEL001148	homeobox protein	H14	0.836692	0.14407	-0.0305959	-0.172645	-0.0854408	-0.132204	-0.517237	-0.790839	-0.949706	1.7864	0.0044354
AAEL001149	conserved hypothetical protein		0.260781	-0.199128	0.147347	-0.132591	0.0175497	0.0519207	-0.124711	-0.199252	-0.178893	0.460033	0.790259
AAEL001150	conserved hypothetical protein		-0.13069	0.667108	-0.198357	0.0315481	0.0151771	-0.258973	0.109757	0.0157086	0.196498	0.926081	0.0705404
AAEL001151	n-acetylgalactosaminyltransferase		0.541773	-0.260338	-0.0344665	0.0479553	-0.146978	0.0299032	-0.188813	-0.0967741	-0.153455	0.802111	0.154
AAEL001152	beta-1,3-galactosyltransferase-6		-0.515523	-0.362035	-0.285127	0.113037	-0.0470499	0.220151	0.065412	-0.0621813	0.0470499	0.735674	0.278918
AAEL001154	conserved hypothetical protein		0.0195507	0.131852	-0.300184	-0.0999464	-0.019505	0.0473159	0.0989094	-0.0218481	-0.100829	0.432036	0.754471
AAEL001155	hypothetical protein		-0.476595	-0.0830559	0.094137	-0.00578246	0.0649889	0.019813	0.242969	-0.108589	0.151233	0.719564	0.994078
AAEL001156	conserved hypothetical protein		-0.102084	0.304198	-0.0984456	-0.118503	-0.135039	0.0216211	-0.0217826	0.870846	0.646303	1.00588	0.651023
AAEL001157	light protein		-0.599492	0.251567	0.216773	-0.0165413	0.20376	-0.0610756	0.0324717	-0.0264767	0.106434	0.851059	0.298093
AAEL001158	fructose-1,6-bisphosphatase	H4	0.237252	1.37991	0.519655	-0.000428127	-0.190648	-0.0040356	-0.163625	-0.0512439	-0.122521	1.57056	4.69e-15
AAEL001159	ribonuclease t2		-0.0934014	0.291414	0.202987	0.0234527	0.367451	-0.0720112	-0.0568631	-0.0234527	-0.131674	0.499125	0.148114
AAEL001160	zinc finger protein		0.0884029	0.0182802	-0.0182802	0.158583	0.0430592	-0.0970395	-0.0489686	-0.311772	0.314605	0.626377	0.87199
AAEL001162	conserved hypothetical protein		-0.70072	0.710547	-0.126931	0.0163492	0.143103	0.282039	0.0898165	0.231412	0.131885	1.41127	0.190082
AAEL001163	macroglobulin/complement		0.0435842	0.587454	-0.124264	-0.283014	-0.224915	-0.0435842	0.304474	0.419598	0.660077	0.943091	5.54e-06
AAEL001164	NADH:ubiquinone dehydrogenase, putative	H2	0.576944	0.634746	0.34297	0.134895	-0.174901	-0.133492	-0.360566	-0.570373	-0.71714	1.35189	9.92e-15
AAEL001165	ras GTP exchange factor, son of sevenless		-0.559083	-0.114643	-0.093184	0.0027534	0.0456484	0.121296	0.473435	-0.0901904	0.662057	1.22114	0.0112563
AAEL001166	protein phosphatases pp1 regulatory subunit		-0.317554	0.48099	0.0680152	0.0937337	0.0203764	0.0687574	0.0950917	0.193494	0.338011	0.798544	0.298804
AAEL001167	synaptotagmin		0.270558	-0.198206	-0.0998938	-0.123128	-0.132201	0.14156	-0.0649427	0.00757176	-0.00757176	0.468764	0.995629
AAEL001168	hypothetical protein		-0.564706	-0.556256	0.354062	-0.0265292	0.719832	0.117925	0.390926	0.0265292	-0.178054	1.28454	0.652024
AAEL001169	Ribosome biogenesis protein BOP1 homolog	H13	0.338969	-1.31291	-0.529321	0.0348198	0.00672712	-0.00672712	-0.212451	-0.222287	-0.154453	1.65188	1.64e-10
AAEL001170	conserved hypothetical protein		-0.0222278	0.51198	0.19281	-0.0117353	-0.00832867	0.0942027	-0.0330153	-0.130365	-0.221449	0.733429	0.021503
AAEL001171	tRNA-dihydrouridine synthase	H14	0.170967	-0.771543	-0.841672	-0.268261	0.000819763	0.125294	-0.18153	0.0427919	-0.200288	1.01264	3.11e-08
AAEL001172	conserved hypothetical protein		0.0485708	0.178581	-0.107401	-0.0507898	0.105325	-0.00325066	0.10526	-0.146327	0.00325066	0.324908	0.983678
AAEL001173	amidase		0.210384	0.711571	0.738266	0.234756	0.16719	-0.0542224	-0.165358	-0.0279734	-0.0703926	0.903624	9e-07
AAEL001175	DNA photolyase		-0.0516258	-0.129252	-0.0932965	0.0706992	0.153716	0.199068	-0.182266	-0.0539911	0.00345545	0.381334	0.927902
AAEL001176	s-adenosylmethionine decarboxylase	H14	0.911854	0.331038	-0.314613	0.0166109	0.156925	0.116934	-0.0225358	0.0488052	-0.259169	1.22647	2.31e-05
AAEL001177	signal recognition particle, 14kD, putative		0.0903419	-0.26621	0.030299	0.138774	0.135351	0.0467234	0.000828728	0.0226458	0.62615	0.89236	0.41082
AAEL001179	conserved hypothetical protein		0.13368	0.0178423	-0.391907	-0.170963	-0.236718	-0.0178423	0.160627	0.103944	0.144112	0.552533	0.904843
AAEL001180	hypothetical protein		0.650751	0.298139	-0.319046	-0.134735	0.0150976	0.135459	-0.0150976	-0.286225	-0.800921	1.45167	0.843133
AAEL001181	hypothetical protein		0.20236	0.304269	-0.112101	-0.178876	0.263541	-0.101409	-0.159252	-0.291002	-0.21896	0.595271	0.740544
AAEL001182	phosphotyrosyl phosphatase activator		-0.550374	-0.0993921	-0.158272	-0.0972295	0.134037	0.17514	0.094859	-0.0520164	-0.074583	0.725514	0.13343
AAEL001183	zinc binding dehydrogenase		0.13573	-0.121522	-0.255984	-0.161267	-0.258063	-0.0258121	-0.148169	-0.302381	-0.480322	0.616053	0.330976
AAEL001184	conserved hypothetical protein		0.250786	0.200024	0.005063	-0.0423923	-0.0700344	-0.248936	-0.337626	-0.454817	-0.543137	0.793923	0.000688066
AAEL001185	conserved hypothetical protein		-0.554391	0.14509	-0.0529653	-0.0390332	0.0339125	-0.0514564	0.00657134	0.170005	0.107649	0.724396	0.838975
AAEL001186	hypothetical protein		-0.839377	-0.0427039	0.577679	0.455352	0.600519	-0.722079	-0.465431	0.0427039	0.417969	1.4399	0.215385
AAEL001187	conserved hypothetical protein		0.0654262	-0.300034	-0.17269	-0.112906	0.125762	0.113985	0.0887577	0.1256	0.171913	0.471947	0.305713
AAEL001188	conserved hypothetical protein		-0.121754	-0.181026	0.155156	-0.0182059	0.0632004	-0.05241	-0.0574885	-0.0463244	-0.0412494	0.336182	0.914868
AAEL001190	conserved hypothetical protein		-0.098845	0.439409	0.543949	-0.198531	-0.0942246	0.0206795	0.00974473	0.26525	0.502085	0.742479	0.00914341
AAEL001191	conserved hypothetical protein		-0.137598	0.0380139	-0.129273	-0.0356943	0.21248	0.0374748	-0.131025	-0.128731	-0.117583	0.350078	0.686812
AAEL001192	hypothetical protein		-0.865571	-0.100943	-0.616694	-0.227469	0.0113638	0.153882	0.489358	0.329666	0.103213	1.35493	0.0278555
AAEL001193	regulator of g protein signaling		0.226282	0.0085792	-0.165798	-0.0085792	-0.0878959	0.0235466	-0.475676	-0.169166	-0.0268785	0.701959	0.996809
AAEL001194	fatty acid synthase	H7	-0.443476	-1.86056	0.649913	0.794026	0.416361	-0.0940832	-0.152416	-0.119852	-0.382023	2.65458	1.3e-14
AAEL001195	juvenile hormone-inducible protein, putative		1.14272	-0.131837	-0.1047	-0.360666	-0.0909384	-0.0063706	-0.592712	0.948318	0.651959	1.73544	0.0490184
AAEL001196	cadherin		-0.269452	-0.771657	-0.326089	0.255285	0.0127737	0.0709826	-0.294168	-0.0162323	-0.204628	1.02694	0.86807
AAEL001197	hypothetical protein		-0.0258705	0.21019	-0.0718442	-0.345572	-0.0407566	-0.29761	-0.75295	0.155199	-0.0170254	0.963139	0.923793
AAEL001198	sodium/solute symporter		0.171933	-0.0862048	0.104405	-0.216871	-0.343356	-0.2506	-0.482576	-0.335569	-0.377405	0.654509	0.0718372
AAEL001199	Putative GTP-binding protein 5		0.137531	0.438644	0.125012	-0.0644435	-0.10554	-0.0473804	-0.247708	-0.257891	-0.516263	0.954908	3.53e-05
AAEL001200	aspartyl-tRNA synthetase		-0.561988	-0.186837	-0.286532	-0.17135	0.0210615	0.0273676	0.0529005	0.0767822	0.029282	0.63877	0.169373
AAEL001201	hypothetical protein		-0.202961	0.0860768	-0.131812	-0.0469395	-0.0536915	0.045094	-0.071671	-0.196664	-0.117486	0.289037	0.938371
AAEL001202	conserved hypothetical protein		-0.376439	-0.0868636	0.270153	-0.0698884	0.0604382	-0.0137791	0.0137791	0.2519	0.311482	0.687921	0.745774
AAEL001203	conserved hypothetical protein		0.118742	-0.111542	0.024345	-0.121155	-0.000137401	0.255208	-0.0536179	-0.228991	-0.227887	0.484199	0.890801
AAEL001204	sterol o-acyltransferase	H6	-0.342685	-0.0773034	0.858629	-0.0329619	-0.160309	-0.0999413	-0.0789813	0.111876	0.0329619	1.20131	2.89e-09
AAEL001205	ubiquitin protein ligase		-0.116193	0.228777	-0.0218397	-0.0155646	0.049425	-0.014168	0.0470189	0.0673515	0.109135	0.34497	0.928008
AAEL001206	threonyl-tRNA synthetase		0.266642	-0.0630934	-0.406317	-0.113127	-0.0635093	0.00752939	-0.0906204	-0.00752939	0.0357108	0.672959	0.400424
AAEL001207	hypothetical protein		-0.122106	-0.0516359	-0.105633	0.232435	0.00760223	0.164625	0.0860738	-0.00760223	0.0383796	0.354541	0.902072
AAEL001208	ubiquitin-conjugating enzyme variant		0.273796	-0.413868	0.362687	0.13494	-0.270044	0.38356	-0.287635	-0.925677	-0.718285	1.30924	0.0525704
AAEL001209	sodium-dependent phosphate transporter	H5	-0.689372	0.0549048	0.424809	-0.132054	0.0270437	-0.0778974	-0.130289	-0.0270437	-0.256472	1.11418	0.00331669
AAEL001210	NADH ubiquinone oxidoreductase subunit, putative	H12	1.02749	0.619884	0.558161	0.0237603	-0.00949131	0.00949131	-0.391028	-0.231354	-0.652227	1.67971	7.24e-10
AAEL001211	COMPASS component SWD2, putative		-0.245917	-0.287516	0.0522046	-0.125599	0.2247	-0.0282838	0.0203399	0.132083	0.112662	0.512216	0.802515
AAEL001212	phosphoinositide-binding protein, putative		-0.117394	0.296979	-0.098133	-0.0251713	-0.0448194	0.0402637	0.201161	0.0559317	0.381652	0.499045	0.100828
AAEL001215	hypothetical protein		0.439259	-0.163968	-0.0496963	-0.10331	0.0681923	-0.199832	-0.350495	-0.171507	-0.429849	0.869108	0.0400215
AAEL001216	DEAD box ATP-dependent RNA helicase	H13	0.146265	-0.875253	-0.169199	0.00725023	-0.00285547	0.0369289	-0.0957574	0.00285547	0.00352503	1.02152	0.000184483
AAEL001218	alanyl-tRNA synthetase		0.0848637	-0.285496	-0.253261	0.0138711	0.0514283	0.119964	0.0378163	0.025785	0.142141	0.427637	0.388029
AAEL001219	hypothetical protein		0.267774	-0.537705	0.375435	0.263474	0.511923	-0.405501	0.0672532	-0.0423413	-0.380058	1.04963	0.520012
AAEL001220	Myosin-VIIa (Protein crinkled)		-0.115171	-0.529385	-0.200021	-0.0184181	0.201422	-0.0287788	-0.000992062	0.198948	0.0122683	0.730807	0.236245
AAEL001223	engulfment and cell motility protein		-0.0342573	0.146306	-0.00684716	0.264732	-0.118545	0.283365	0.349188	0.103153	0.62097	0.739514	0.398477
AAEL001225	glycoside hydrolases	H3	0.158162	2.13567	0.0905866	0.311324	0.000565119	-0.125753	-0.160502	-0.0581791	0.482966	2.29617	3.61e-21
AAEL001228	myelin transcription factor 1, myt1		0.015278	-0.260684	-0.407228	-0.0240824	-0.419927	0.237394	-0.00756173	0.186496	0.00756173	0.65732	0.560335
AAEL001230	myelin transcription factor 1, myt1		0.246699	-0.550197	-0.0273985	-0.082223	0.433743	0.105025	-0.0847911	-0.174487	0.239238	0.98394	0.456473
AAEL001231	MIND-MELD/ADAM		-0.562523	0.257982	-0.37465	0.169442	-0.248954	-0.018177	0.567243	0.018177	-0.0590553	1.12977	0.836041
AAEL001232	tubulointerstitial nephritis antigen	H10	1.26385	1.05743	0.303298	0.100378	-0.230658	-0.240461	-0.187103	-0.340734	0.360982	1.60458	1.46e-19
AAEL001233	Clip-domain serine protease, family E. Protease homologue.		0.220989	0.24576	0.0663907	-0.385324	0.0729752	-0.533777	-0.285201	-0.362283	0.0701159	0.779537	0.80662
AAEL001235	palmitoyl-protein thioesterase		-0.351428	0.414879	0.0260661	-0.0502012	0.169742	0.127292	-0.0222888	0.0222888	0.0863453	0.766307	0.240523
AAEL001236	conserved hypothetical protein		-0.41822	0.104077	-0.449475	-0.217077	0.209539	-0.0895555	0.12452	0.147371	0.331409	0.780884	0.0374188
[truncated: 11,258 more rows]

## Sheet: 2c
Gene ID	Description	Cluster	Day 1	Day 2	Day 3	Day 4	Day 5	Day 6	Day 7	Day 8	FDR
[truncated: 12,151 more rows]

## Sheet: 2d
Gene ID	Description	Cluster	Day 1	Day 2	Day 3	Day 4	Day 5	Day 6	Day 7	Day 8
[truncated: 60 more rows]

[truncated: 8 more sheets: 3a, 3b, 3c, 4, 5a, 5b, 5c, 5d]
